# Supplementary material for: Reconstructing the three-dimensional architecture of extrachromosomal DNA with ec3D
Source: Nat Commun. 2025 Dec 20;17:894. doi: 10.1038/s41467-025-67614-7 (PMC12830899; doi:10.1038/s41467-025-67614-7)
Supplement: Supplementary file 3 — Supplementary Data 1 [file 41467_2025_67614_MOESM3_ESM.xlsx]

## Sheet: Reconstruction RMSD & PCC from 
Supplementary Data 1 - RMSD and PCC ranges from simulated Hi-C. RMSD and PCC between the 900 (450 without duplication and 450 with duplication) ground truth and reconstructed structures were compared to those computed with two randomly selected structures, with the same or different base structure(s).
Sample group	Metric	Mean	Std	Min	0.25	0.5	0.75	Max
Ground truth - reconstruction, non- duplication	RMSD	0.092	0.096	0.012	0.032	0.058	0.106	0.513
Ground truth - reconstruction, duplication	RMSD	0.139	0.103	0.014	0.054	0.102	0.201	0.482
Two random structures with the same base	RMSD	0.369	0.146	0.134	0.268	0.338	0.429	0.846
Two random structures with different bases	RMSD	0.578	0.073	0.418	0.525	0.573	0.638	0.735
Ground truth - reconstruction, non- duplication	PCC	0.982	0.034	0.72	0.984	0.996	0.999	1
Ground truth - reconstruction, duplication	PCC	0.952	0.068	0.625	0.936	0.984	0.996	1
Two random structures with the same base	PCC	0.732	0.17	0.253	0.637	0.786	0.858	0.964
Two random structures with different bases	PCC	0.456	0.106	0.152	0.386	0.454	0.531	0.709
