# Supplementary material for: Reconstructing the three-dimensional architecture of extrachromosomal DNA with ec3D
Source: Nat Commun. 2025 Dec 20;17:894. doi: 10.1038/s41467-025-67614-7 (PMC12830899; doi:10.1038/s41467-025-67614-7)
Supplement: Supplementary file 4 — Supplementary Data 2 [file 41467_2025_67614_MOESM4_ESM.xlsx]

## Sheet: Statistical significance of rec
Supplementary Data 2 - Statistical difference, through a two-sided Wilcoxon rank-sum test, between the RMSD and PCC values from ec3D's reconstruction and two random structures.
Ec3D reconstruction	Two random structures	RMSD p-value	PCC p-value
Ground truth - reconstruction, non- duplication (450 pairs)	Two random structures with the same base structure	3.7525e-122	2.7649e-140
Ground truth - reconstruction, non- duplication (450 pairs)	Two random structures with different base structures	1.2276e-147	5.945e-149
Ground truth - reconstruction, duplication (450 pairs)	Two random structures with the same base structure	5.4972e-102	7.8665e-112
Ground truth - reconstruction, duplication (450 pairs)	Two random structures with different base structures	1.999e-148	8.0252e-149
