# Supplementary material for: Reconstructing the three-dimensional architecture of extrachromosomal DNA with ec3D
Source: Nat Commun. 2025 Dec 20;17:894. doi: 10.1038/s41467-025-67614-7 (PMC12830899; doi:10.1038/s41467-025-67614-7)
Supplement: Supplementary file 5 — Supplementary Data 3 [file 41467_2025_67614_MOESM5_ESM.xlsx]

## Sheet: Cell lines
Supplementary Data 3 - Summary characteristics of the 9 cell lines used in this study.
Cell line	Tissue type	EC/HSR	Duplication	Size (MB)	Oncogene(s) amplified	Optimal alpha	Ratio smallest dimension / largest dimension (from MBB)	# Significant interactions wrt different methods			# Crossing toplogical constrictions
								Reference + Hi-C	Circular + Hi-C	Circular + Spatial distance
GBM39	GBM	EC	FALSE	1.25	EGFR	-0.998669	0.476	585	517	679	0
GBM39HSR	GBM	HSR	FALSE	1.25	EGFR	-1.05436	0.543	374	364	1178	N/A
CHP-212	NB	EC	FALSE	1.685	DDX1, MYCN, TRIB2	-0.904208	0.599	397	9	1018	2
IMR-5/75	NB	HSR	TRUE	3.535	MEIS1, MYCN	-0.938317	0.488	6543	604	188	N/A
RCMB56	MB	EC	FALSE	3.2	DNTTIP2	-1.31492	0.662	3303	1405	3871	86
D458	MB	EC	TRUE	2.545	MYC, OTX2, PVT1	-1.24591	0.834	2971	1542	3205	15
H2170	LUSC	EC	TRUE	3.305	ERBB2, RARA, PVT1, THRA, MYC, CSF3, MIEN1, CDC6	-1.47651	0.895	6745	3212	5467	4
MSTO211H (G1 - rep1)	BMM	EC	FALSE	0.498	MYC, CASC11	-1.21534	0.512	132	41	24	N/A
MSTO211H (G1 - rep2)						-1.25757	0.547	139	34	16	N/A
MSTO211H (M - rep1)						-0.606485	0.716	166	164	61	N/A
MSTO211H (M - rep2)						-0.602537	0.813	147	144	95	N/A
TR14 (MDM2)	NB	EC	FALSE	1.01	MDM2	-1.15508	0.488	145	156	587	N/A
TR14 (MYCN)			FALSE	0.715	MYCN	-0.911036	0.663	363	123	55	N/A
					Alpha mean	-1.05238
					Alpha std	0.270159
