# Supplementary material for: Reconstructing the three-dimensional architecture of extrachromosomal DNA with ec3D
Source: Nat Commun. 2025 Dec 20;17:894. doi: 10.1038/s41467-025-67614-7 (PMC12830899; doi:10.1038/s41467-025-67614-7)
Supplement: Supplementary file 7 — Supplementary Data 5 [file 41467_2025_67614_MOESM7_ESM.xlsx]

## Sheet: RMSD & PCC between duplicated s
Supplementary Data 5 - RMSD and PCC values computed from local structures of duplicated segments reconstructed by ec3D, and their empirical P-values from a permutation test.
Cell line	Starting and ending bins	Starting and ending bins (duplication)	Size (# 5K bins)	RMSD	PCC	Empirical P-value
D458	[9, 12]	[370, 373]	4	0.16	0.9973	0.3092
D458	[115, 156]	[415, 374]	42	0.202	0.9581	0.0706
D458	[236, 239]	[416, 419]	4	0.156	0.9923	0.161
D458	[240, 255]	[369, 354]	16	0.1251	0.9973	0.0168
D458	[341, 351]	[497, 507]	11	0.0756	0.9967	0.0242
H2170	[18, 96]	[364, 442]	79	0.2759	0.9319	0.016
H2170	[260, 281]	[342, 363]	22	0.3363	0.8175	0.8348
H2170	[97, 259]	[443, 605]	163	0.302	0.7758	0.175
IMR-5/75	[6, 99]	[100, 193]	94	0.4067	0.8389	0.3366
