# Supplementary material for: Reconstructing the three-dimensional architecture of extrachromosomal DNA with ec3D
Source: Nat Commun. 2025 Dec 20;17:894. doi: 10.1038/s41467-025-67614-7 (PMC12830899; doi:10.1038/s41467-025-67614-7)
Supplement: Supplementary file 8 — Supplementary Data 6 [file 41467_2025_67614_MOESM8_ESM.xlsx]

## Sheet: Significant interaction methods
Supplementary Data 6 - Summary of methods to compute significant interactions, and the types of significant interactions they can capture. Dark grey indicates that the corresponding method for sure captures that cause of significant interactions; Light grey indicates that we do not intend to capture such interactions, but they can still play a role in our computation of significant interactions.
Method	Breakpoint on ecDNA primary sequence	Breakpoint NOT on ecDNA primary sequence	Topological Constriction (TCs), indicating chromatin conformations	Secondary interactions (due to e.g. alternative 3D structures, intermolecular interactions and so on)
A: Reference genomic distance + HiC	TRUE	TRUE	TRUE	TRUE
B: Circular genomic distance + HiC	FALSE	TRUE	TRUE	TRUE
C: Circular genomic distance + Spatial distance	FALSE	TRUE	TRUE	FALSE
