# Supplementary material for: Reconstructing the three-dimensional architecture of extrachromosomal DNA with ec3D
Source: Nat Commun. 2025 Dec 20;17:894. doi: 10.1038/s41467-025-67614-7 (PMC12830899; doi:10.1038/s41467-025-67614-7)
Supplement: Supplementary file 9 — Supplementary Data 7 [file 41467_2025_67614_MOESM9_ESM.xlsx]

## Sheet: Significant interaction cluster
Supplementary Data 7 - TAD boundaries (from 3D structure) matched to CTCF peaks on CHP-212 ecDNA. TAD boundaries and CTCF peaks are represented by 5-kb bins on the ecDNA.
TAD boundary	Matched to a CTCF peak	CTCF peak
6	TRUE	6
18	TRUE	19
27	TRUE	26
37	TRUE	37
47	TRUE	46
57	FALSE	N/A
64	TRUE	65
75	TRUE	74
84	TRUE	84
92	FALSE	N/A
102	FALSE	N/A
109	FALSE	N/A
119	FALSE	N/A
125	FALSE	N/A
145	TRUE	145
153	FALSE	N/A
162	TRUE	163
171	FALSE	N/A
180	FALSE	N/A
189	FALSE	N/A
200	TRUE	199
211	TRUE	211
218	TRUE	218
230	FALSE	N/A
231	FALSE	N/A
239	FALSE	N/A
248	FALSE	N/A
249	FALSE	N/A
258	FALSE	N/A
275	FALSE	N/A
281	TRUE	280
292	FALSE	N/A
303	FALSE	N/A
314	FALSE	N/A
322	FALSE	N/A
327	FALSE	N/A
