# Supplementary material for: Reconstructing the three-dimensional architecture of extrachromosomal DNA with ec3D
Source: Nat Commun. 2025 Dec 20;17:894. doi: 10.1038/s41467-025-67614-7 (PMC12830899; doi:10.1038/s41467-025-67614-7)
Supplement: Supplementary file 10 — Supplementary Data 8 [file 41467_2025_67614_MOESM10_ESM.xlsx]

## Sheet: Significant interaction cluster
Supplementary Data 8 - TAD boundaries (from Hi-C) matched to CTCF peaks on CHP-212 ecDNA. TAD boundaries and CTCF peaks are represented by 5-kb bins on the ecDNA.
TAD boundary	Matched to a CTCF peak	CTCF peak
7	TRUE	6
12	FALSE	N/A
26	TRUE	26
36	TRUE	37
37	TRUE	37
59	FALSE	N/A
67	FALSE	N/A
83	TRUE	84
96	FALSE	N/A
108	FALSE	N/A
120	FALSE	N/A
131	FALSE	N/A
139	FALSE	N/A
145	TRUE	145
150	FALSE	N/A
160	FALSE	N/A
183	FALSE	N/A
192	FALSE	N/A
202	FALSE	N/A
218	TRUE	218
220	FALSE	N/A
223	FALSE	N/A
238	FALSE	N/A
251	FALSE	N/A
258	FALSE	N/A
270	FALSE	N/A
276	FALSE	N/A
277	FALSE	N/A
282	FALSE	N/A
284	FALSE	N/A
293	FALSE	N/A
300	FALSE	N/A
306	FALSE	N/A
315	FALSE	N/A
322	FALSE	N/A
337	FALSE	N/A
