# Supplementary material for: Reconstructing the three-dimensional architecture of extrachromosomal DNA with ec3D
Source: Nat Commun. 2025 Dec 20;17:894. doi: 10.1038/s41467-025-67614-7 (PMC12830899; doi:10.1038/s41467-025-67614-7)
Supplement: Supplementary file 11 — Supplementary Data 9 [file 41467_2025_67614_MOESM11_ESM.xlsx]

## Sheet: Significant interaction cluster
Supplementary Data 9 - Clusters of significant interactions (ref-SI) in D458. Clusters with single interactions are omitted.
Cluster	Bin range	Reference Coordinates	Connections
0	A - [0, 23]	chr8:128460000-128580000	C, D
0	B - [49, 54]	chr8:128705000-128735000	C, D
0	C - [350, 352]	chr8:127955000-127970000	A, B, D
0	D - [482, 509]	chr14:56800000-56875000; chr8:127960000-128015000; chr8:128445000-128455000	A, B, C
1	A - [58, 60]	chr8:128750000-128765000	B
1	B - [300, 305]	chr8:128190000-128220000	A
2	A - [24, 35]	chr8:128580000-128640000	C
2	B - [38, 48]	chr8:128650000-128705000	C
2	C - [433, 481]	chr14:56660000-56795000; chr14:56875000-56985000	A, B
4	A - [36, 37]	chr8:128640000-128650000	C, D
4	B - [79, 81]	chr8:128855000-128870000	D
4	C - [89, 148]	chr8:127295000-127415000; chr8:128905000-129085000	A, D
4	D - [211, 234]	chr8:127725000-1278450000	A, B, C
5	A - [152, 157]	chr8:127430000-127460000	B
5	B - [353, 432]	chr8:127850000-127955000; chr8:128505000-128525000; chr8:127450000-129040000; chr14:56595000-56660000	A
6	A - [84, 86]	chr8:128880000-128895000	C, D, E
6	B - [150, 150]	chr8:127420000-127425000	C
6	C - [205, 210]	chr8:127695000-127725000	A, B, D
6	D - [235, 289]	chr8:127845000-127950000; chr8:128270000-128440000	A, C, E
6	E - [340, 344]	chr8:127995000-128020000	A, D
