# Supplementary material for: Reconstructing the three-dimensional architecture of extrachromosomal DNA with ec3D
Source: Nat Commun. 2025 Dec 20;17:894. doi: 10.1038/s41467-025-67614-7 (PMC12830899; doi:10.1038/s41467-025-67614-7)
Supplement: Supplementary file 12 — Supplementary Data 10 [file 41467_2025_67614_MOESM12_ESM.xlsx]

## Sheet: Sheet1
Supplementary Data 10 - MDM2 Oligopaints
GGGTAGCGCTAGGTTGACGCCGTGGTTGTGGGACCCGATCGACGACCCCCCAGATCAATATGTTCCTTTGCTCTGACCCATTGTCGCAGACGCCTAACCGGAAGCACCCTCCGACGCTGCAACCAAAGTGC
GGGTAGCGCTAGGTTGACGCCGTGGTTGTGGGACCCGATCGACGACCAAAGGCCTGGCATCCTTACTCTATAAAGGATAGGCCTCGCAGACGCCTAACCGGAAGCACCCTCCGACGCTGCAACCAAAGTGC
GGGTAGCGCTAGGTTGACGCCGTGGTTGTGGGACCCGATCGACGACCCCTCACATACTTGTTACTGAACCAACCTAGTGCAGGGCGCAGACGCCTAACCGGAAGCACCCTCCGACGCTGCAACCAAAGTGC
GGGTAGCGCTAGGTTGACGCCGTGGTTGTGGGACCCGATCGACGACCAAACATGTCCCACAGTACAGATAGTGGCAACGTTTCCCGCAGACGCCTAACCGGAAGCACCCTCCGACGCTGCAACCAAAGTGC
GGGTAGCGCTAGGTTGACGCCGTGGTTGTGGGACCCGATCGACGACCAGTTGATATGGTAAGATGCCAGTGACCCCAGTACAGCCGCAGACGCCTAACCGGAAGCACCCTCCGACGCTGCAACCAAAGTGC
GGGTAGCGCTAGGTTGACGCCGTGGTTGTGGGACCCGATCGACGACCGAAATCGCTTGATACTGAAAACCTTGCGAGCAGACACGCAGACGCCTAACCGGAAGCACCCTCCGACGCTGCAACCAAAGTGC
GGGTAGCGCTAGGTTGACGCCGTGGTTGTGGGACCCGATCGACGACCTAGTGAGGAATGGAGTCAACCGCATACACCACACGCAGACGCCTAACCGGAAGCACCCTCCGACGCTGCAACCAAAGTGC
GGGTAGCGCTAGGTTGACGCCGTGGTTGTGGGACCCGATCGACGACCAATATAGGAGGTCACCTGATTTTACCACCAGAGGGCACGCAGACGCCTAACCGGAAGCACCCTCCGACGCTGCAACCAAAGTGC
GGGTAGCGCTAGGTTGACGCCGTGGTTGTGGGACCCGATCGACGACCTTAAGAAGTAGGGCAAACAATGTCCACTTGCTCGTGACGCAGACGCCTAACCGGAAGCACCCTCCGACGCTGCAACCAAAGTGC
GGGTAGCGCTAGGTTGACGCCGTGGTTGTGGGACCCGATCGACGACCATTCTGCTACTGAAACATACCAGGAGGGAAAGCAGTCGCAGACGCCTAACCGGAAGCACCCTCCGACGCTGCAACCAAAGTGC
GGGTAGCGCTAGGTTGACGCCGTGGTTGTGGGACCCGATCGACGACCTCACAGCATGCACTGAGGGCCACAGACAAACGCAGACGCCTAACCGGAAGCACCCTCCGACGCTGCAACCAAAGTGC
GGGTAGCGCTAGGTTGACGCCGTGGTTGTGGGACCCGATCGACGACCAAGTTGGCAGTGTTAAATTTGATGTTTCCTCTCCCGGCGCAGACGCCTAACCGGAAGCACCCTCCGACGCTGCAACCAAAGTGC
GGGTAGCGCTAGGTTGACGCCGTGGTTGTGGGACCCGATCGACGACCATGCAATCTTTATCTAGCAAAACAGGGGTGAGCTGGTCGCAGACGCCTAACCGGAAGCACCCTCCGACGCTGCAACCAAAGTGC
GGGTAGCGCTAGGTTGACGCCGTGGTTGTGGGACCCGATCGACGACCTTAAATTTCTCCTATTCCTCTCACCACCCTCCCCTCACGCAGACGCCTAACCGGAAGCACCCTCCGACGCTGCAACCAAAGTGC
GGGTAGCGCTAGGTTGACGCCGTGGTTGTGGGACCCGATCGACGACCACTCCCACCTTTTACATTTCTATGTTCTTCCCCACGTCGCAGACGCCTAACCGGAAGCACCCTCCGACGCTGCAACCAAAGTGC
GGGTAGCGCTAGGTTGACGCCGTGGTTGTGGGACCCGATCGACGACCCCCAACTGGTCTATCTCTATTCTCTGCATGAGATGGCCGCAGACGCCTAACCGGAAGCACCCTCCGACGCTGCAACCAAAGTGC
GGGTAGCGCTAGGTTGACGCCGTGGTTGTGGGACCCGATCGACGACCACCTTACCCATTACAAGGATATCATTTCCCGCCTGCCGCAGACGCCTAACCGGAAGCACCCTCCGACGCTGCAACCAAAGTGC
GGGTAGCGCTAGGTTGACGCCGTGGTTGTGGGACCCGATCGACGACCATCCAAAGGAGCCTTCCTGGGTTTGAGGATAATCACGCAGACGCCTAACCGGAAGCACCCTCCGACGCTGCAACCAAAGTGC
GGGTAGCGCTAGGTTGACGCCGTGGTTGTGGGACCCGATCGACGACCGGACTGATGCTGCATTTGTGCAGCAGAAAGTATCACGCAGACGCCTAACCGGAAGCACCCTCCGACGCTGCAACCAAAGTGC
GGGTAGCGCTAGGTTGACGCCGTGGTTGTGGGACCCGATCGACGACCGTGAGCCACATGCTGTCATGTGCTGCGTTCCGCAGACGCCTAACCGGAAGCACCCTCCGACGCTGCAACCAAAGTGC
GGGTAGCGCTAGGTTGACGCCGTGGTTGTGGGACCCGATCGACGACCTTCATTTTCCTCTTTAGAAATGGGTGAGGTGGAGCCCCGCAGACGCCTAACCGGAAGCACCCTCCGACGCTGCAACCAAAGTGC
GGGTAGCGCTAGGTTGACGCCGTGGTTGTGGGACCCGATCGACGACCATACCTTTGGGAACACAAATGGAGTTGAGTGAGTCCCCGCAGACGCCTAACCGGAAGCACCCTCCGACGCTGCAACCAAAGTGC
GGGTAGCGCTAGGTTGACGCCGTGGTTGTGGGACCCGATCGACGACCAGAGGAAAAGCCTACCTAGAACCTACTCAACCTGAGTCGCAGACGCCTAACCGGAAGCACCCTCCGACGCTGCAACCAAAGTGC
GGGTAGCGCTAGGTTGACGCCGTGGTTGTGGGACCCGATCGACGACCTTTTGCATTGAGCACCTGATTAACCTCCATGAGTCCACGCAGACGCCTAACCGGAAGCACCCTCCGACGCTGCAACCAAAGTGC
GGGTAGCGCTAGGTTGACGCCGTGGTTGTGGGACCCGATCGACGACCAAGTGACACTGAGAAAGAGCACATCTTCTCATCTCCCCGCAGACGCCTAACCGGAAGCACCCTCCGACGCTGCAACCAAAGTGC
GGGTAGCGCTAGGTTGACGCCGTGGTTGTGGGACCCGATCGACGACCATGTGTCCCTCAAGGGTCCCTCATCACCTTCGCAGACGCCTAACCGGAAGCACCCTCCGACGCTGCAACCAAAGTGC
GGGTAGCGCTAGGTTGACGCCGTGGTTGTGGGACCCGATCGACGACCCCCTTCCTGAACTCAGGTCAGATGGATTTCCTCCCGCAGACGCCTAACCGGAAGCACCCTCCGACGCTGCAACCAAAGTGC
GGGTAGCGCTAGGTTGACGCCGTGGTTGTGGGACCCGATCGACGACCTTTCCCAAGCTTCAATGCCTCCCTTGCGCTCGCAGACGCCTAACCGGAAGCACCCTCCGACGCTGCAACCAAAGTGC
GGGTAGCGCTAGGTTGACGCCGTGGTTGTGGGACCCGATCGACGACCTCCGTATTAATTTGGCCACTATCCGAGGCTATGTTGGCGCAGACGCCTAACCGGAAGCACCCTCCGACGCTGCAACCAAAGTGC
GGGTAGCGCTAGGTTGACGCCGTGGTTGTGGGACCCGATCGACGACCAAAACAGGACACTTGGGTATACTGGATAAAGCCCTGCCGCAGACGCCTAACCGGAAGCACCCTCCGACGCTGCAACCAAAGTGC
GGGTAGCGCTAGGTTGACGCCGTGGTTGTGGGACCCGATCGACGACCCCTAGGGATCTGGATTGCAGTTGAAGCCATGCCGCAGACGCCTAACCGGAAGCACCCTCCGACGCTGCAACCAAAGTGC
GGGTAGCGCTAGGTTGACGCCGTGGTTGTGGGACCCGATCGACGACCCCCCTCACACCTGAGTGGGCTTGGGTATGCCGCAGACGCCTAACCGGAAGCACCCTCCGACGCTGCAACCAAAGTGC
GGGTAGCGCTAGGTTGACGCCGTGGTTGTGGGACCCGATCGACGACCTTTTCCCCAAGTGCTCCAAACAGTGATGGGGCGCAGACGCCTAACCGGAAGCACCCTCCGACGCTGCAACCAAAGTGC
GGGTAGCGCTAGGTTGACGCCGTGGTTGTGGGACCCGATCGACGACCAATTGGACTCTTCTCTGGACTTTTCTTAGCGGGATGCCGCAGACGCCTAACCGGAAGCACCCTCCGACGCTGCAACCAAAGTGC
GGGTAGCGCTAGGTTGACGCCGTGGTTGTGGGACCCGATCGACGACCTTCCTTAGAGGGTTTACACCCTCAGAAGGCCTATACTCGCAGACGCCTAACCGGAAGCACCCTCCGACGCTGCAACCAAAGTGC
GGGTAGCGCTAGGTTGACGCCGTGGTTGTGGGACCCGATCGACGACCGACAGACAATCCTGTCTGCTGACTTAGCCACGACGCAGACGCCTAACCGGAAGCACCCTCCGACGCTGCAACCAAAGTGC
GGGTAGCGCTAGGTTGACGCCGTGGTTGTGGGACCCGATCGACGACCCATTCTCCCCTTACACCCACCTCTTTGGAAATGTCCCGCAGACGCCTAACCGGAAGCACCCTCCGACGCTGCAACCAAAGTGC
GGGTAGCGCTAGGTTGACGCCGTGGTTGTGGGACCCGATCGACGACCATCTCAGACCAGCTAAGACTGCAGATTACGGGTTACTCGCAGACGCCTAACCGGAAGCACCCTCCGACGCTGCAACCAAAGTGC
GGGTAGCGCTAGGTTGACGCCGTGGTTGTGGGACCCGATCGACGACCGATCAATGAATTCTTAGGGCCTGGGGCCTGCCGCAGACGCCTAACCGGAAGCACCCTCCGACGCTGCAACCAAAGTGC
GGGTAGCGCTAGGTTGACGCCGTGGTTGTGGGACCCGATCGACGACCTTTTAGCGTAAAACGCTGGAGGAGAAGTCAGTAGCACGCAGACGCCTAACCGGAAGCACCCTCCGACGCTGCAACCAAAGTGC
GGGTAGCGCTAGGTTGACGCCGTGGTTGTGGGACCCGATCGACGACCAGCAGCTAAGACAACATGGTACATGTGGTGAGTACACGCAGACGCCTAACCGGAAGCACCCTCCGACGCTGCAACCAAAGTGC
GGGTAGCGCTAGGTTGACGCCGTGGTTGTGGGACCCGATCGACGACCTACCCAACAGGTGATCAAAGGACAAAAGTGACAAGGTCGCAGACGCCTAACCGGAAGCACCCTCCGACGCTGCAACCAAAGTGC
GGGTAGCGCTAGGTTGACGCCGTGGTTGTGGGACCCGATCGACGACCCAGTATTTAGCCATCTCCCTCACTCATGAAGGAAGGGCGCAGACGCCTAACCGGAAGCACCCTCCGACGCTGCAACCAAAGTGC
GGGTAGCGCTAGGTTGACGCCGTGGTTGTGGGACCCGATCGACGACCATCATTCCTGAGAGTTTCTTAATGCCCTCTCTCCCCTCGCAGACGCCTAACCGGAAGCACCCTCCGACGCTGCAACCAAAGTGC
GGGTAGCGCTAGGTTGACGCCGTGGTTGTGGGACCCGATCGACGACCACTGCTAAAGACTAGCTACCTCAGAATTGCAAGGGGCGCAGACGCCTAACCGGAAGCACCCTCCGACGCTGCAACCAAAGTGC
GGGTAGCGCTAGGTTGACGCCGTGGTTGTGGGACCCGATCGACGACCTCATCTCATCCAGTGTGTAGAGATACACCAGGGAAGCCGCAGACGCCTAACCGGAAGCACCCTCCGACGCTGCAACCAAAGTGC
GGGTAGCGCTAGGTTGACGCCGTGGTTGTGGGACCCGATCGACGACCGTACTCACTGTGGTCAGAGCTAAGAATTCAGTGCTGCCGCAGACGCCTAACCGGAAGCACCCTCCGACGCTGCAACCAAAGTGC
GGGTAGCGCTAGGTTGACGCCGTGGTTGTGGGACCCGATCGACGACCTTGCCACATATGAATGTTTACCACTACACCCAAGGGACGCAGACGCCTAACCGGAAGCACCCTCCGACGCTGCAACCAAAGTGC
GGGTAGCGCTAGGTTGACGCCGTGGTTGTGGGACCCGATCGACGACCACAGAGTGGTTCTGAAGTCTGGACCACTATTAAGGCACGCAGACGCCTAACCGGAAGCACCCTCCGACGCTGCAACCAAAGTGC
GGGTAGCGCTAGGTTGACGCCGTGGTTGTGGGACCCGATCGACGACCATATCCATGGTTTTCTGGTCTTCAGACGCCAGTTTGCCGCAGACGCCTAACCGGAAGCACCCTCCGACGCTGCAACCAAAGTGC
GGGTAGCGCTAGGTTGACGCCGTGGTTGTGGGACCCGATCGACGACCTTCAGAGCAAAATACGTCTCTGCATGCCTCATCTTCTCGCAGACGCCTAACCGGAAGCACCCTCCGACGCTGCAACCAAAGTGC
GGGTAGCGCTAGGTTGACGCCGTGGTTGTGGGACCCGATCGACGACCTCATTTTCCCAGTTTCAAACCTTACTTCCCCTACCCCCGCAGACGCCTAACCGGAAGCACCCTCCGACGCTGCAACCAAAGTGC
GGGTAGCGCTAGGTTGACGCCGTGGTTGTGGGACCCGATCGACGACCTTGCCACAATCACACACTTTCTGTGCTGTCCTCGCAGACGCCTAACCGGAAGCACCCTCCGACGCTGCAACCAAAGTGC
GGGTAGCGCTAGGTTGACGCCGTGGTTGTGGGACCCGATCGACGACCCCCCGGTAAGCATCTCATAACATGCTGCCTTCGCAGACGCCTAACCGGAAGCACCCTCCGACGCTGCAACCAAAGTGC
GGGTAGCGCTAGGTTGACGCCGTGGTTGTGGGACCCGATCGACGACCAACTCTTGCTGACCATAAAGTTGATTAGAGCCTGGCTCGCAGACGCCTAACCGGAAGCACCCTCCGACGCTGCAACCAAAGTGC
GGGTAGCGCTAGGTTGACGCCGTGGTTGTGGGACCCGATCGACGACCCACAAGAATACAACCTCCTTCTGTGTTCTTGCCTTGGCGCAGACGCCTAACCGGAAGCACCCTCCGACGCTGCAACCAAAGTGC
GGGTAGCGCTAGGTTGACGCCGTGGTTGTGGGACCCGATCGACGACCAAAATGTTTGGGATACCCTTCATGTGCCAGGCCCGCAGACGCCTAACCGGAAGCACCCTCCGACGCTGCAACCAAAGTGC
GGGTAGCGCTAGGTTGACGCCGTGGTTGTGGGACCCGATCGACGACCTGGCTCAGCTGATAATATTTGCTTCCTAAGGCACAGTCGCAGACGCCTAACCGGAAGCACCCTCCGACGCTGCAACCAAAGTGC
GGGTAGCGCTAGGTTGACGCCGTGGTTGTGGGACCCGATCGACGACCAATAACCATCTCATCGTGCTCTCTGTTTAGCAGCACTCGCAGACGCCTAACCGGAAGCACCCTCCGACGCTGCAACCAAAGTGC
GGGTAGCGCTAGGTTGACGCCGTGGTTGTGGGACCCGATCGACGACCTGTTTGGTGGTTCTTTGCCACATCAGCCCACGCAGACGCCTAACCGGAAGCACCCTCCGACGCTGCAACCAAAGTGC
GGGTAGCGCTAGGTTGACGCCGTGGTTGTGGGACCCGATCGACGACCACCACTGTAAGTGCAGTCTTTCTTTTGTGGTCTCTCTCGCAGACGCCTAACCGGAAGCACCCTCCGACGCTGCAACCAAAGTGC
GGGTAGCGCTAGGTTGACGCCGTGGTTGTGGGACCCGATCGACGACCAAGGACCATGGAACTGATCTTGAGATGATGTTCCAGCCGCAGACGCCTAACCGGAAGCACCCTCCGACGCTGCAACCAAAGTGC
GGGTAGCGCTAGGTTGACGCCGTGGTTGTGGGACCCGATCGACGACCATGAGAAAACTCAAATGCAGACTGAACTTGGGAGTGCCGCAGACGCCTAACCGGAAGCACCCTCCGACGCTGCAACCAAAGTGC
GGGTAGCGCTAGGTTGACGCCGTGGTTGTGGGACCCGATCGACGACCTGGTGTCAACAGAACCATCAGACCGCAGCACGCAGACGCCTAACCGGAAGCACCCTCCGACGCTGCAACCAAAGTGC
GGGTAGCGCTAGGTTGACGCCGTGGTTGTGGGACCCGATCGACGACCTGCTGAGACCAATTGGTCTCCACTACTAGTACCAGGCGCAGACGCCTAACCGGAAGCACCCTCCGACGCTGCAACCAAAGTGC
GGGTAGCGCTAGGTTGACGCCGTGGTTGTGGGACCCGATCGACGACCAAATCAATGGTGTTGGGGCCTCACCGAGGCCGCAGACGCCTAACCGGAAGCACCCTCCGACGCTGCAACCAAAGTGC
GGGTAGCGCTAGGTTGACGCCGTGGTTGTGGGACCCGATCGACGACCAGCCCAACCTTACGGGAGCCAAAAGTCACCCGCAGACGCCTAACCGGAAGCACCCTCCGACGCTGCAACCAAAGTGC
GGGTAGCGCTAGGTTGACGCCGTGGTTGTGGGACCCGATCGACGACCCCTGCTCAGCCTACAAGGCAAGAGGCACTTCGCAGACGCCTAACCGGAAGCACCCTCCGACGCTGCAACCAAAGTGC
GGGTAGCGCTAGGTTGACGCCGTGGTTGTGGGACCCGATCGACGACCAGAATAGAGAAGCTTCTCCAGCAGATTCCAATGCTGTCGCAGACGCCTAACCGGAAGCACCCTCCGACGCTGCAACCAAAGTGC
GGGTAGCGCTAGGTTGACGCCGTGGTTGTGGGACCCGATCGACGACCTGCCTTTCAGTTTCCTGTTTGGGTTTTGCAAGCCGCAGACGCCTAACCGGAAGCACCCTCCGACGCTGCAACCAAAGTGC
GGGTAGCGCTAGGTTGACGCCGTGGTTGTGGGACCCGATCGACGACCTCCTTCAGTTACCCTGGAATGTCAGAACAAGCAATCTCGCAGACGCCTAACCGGAAGCACCCTCCGACGCTGCAACCAAAGTGC
GGGTAGCGCTAGGTTGACGCCGTGGTTGTGGGACCCGATCGACGACCAAAAGCCCGCCTCCTGAGCTCAGTAGTGTGCGCAGACGCCTAACCGGAAGCACCCTCCGACGCTGCAACCAAAGTGC
GGGTAGCGCTAGGTTGACGCCGTGGTTGTGGGACCCGATCGACGACCTGTAGCACATCCTACTCTGATGTTTCTTTCCTGCCTCCGCAGACGCCTAACCGGAAGCACCCTCCGACGCTGCAACCAAAGTGC
GGGTAGCGCTAGGTTGACGCCGTGGTTGTGGGACCCGATCGACGACCTTTAAGTACTAGGGAAAGCTTTTATCTGCCACCGGCCCGCAGACGCCTAACCGGAAGCACCCTCCGACGCTGCAACCAAAGTGC
GGGTAGCGCTAGGTTGACGCCGTGGTTGTGGGACCCGATCGACGACCAGGACTGGAGAGATGAGTTTGCAAATGTTCCACCTCGCAGACGCCTAACCGGAAGCACCCTCCGACGCTGCAACCAAAGTGC
GGGTAGCGCTAGGTTGACGCCGTGGTTGTGGGACCCGATCGACGACCTCATGCTTTGCCCCATATGAGGCTCTCTTCTATCCCGCAGACGCCTAACCGGAAGCACCCTCCGACGCTGCAACCAAAGTGC
GGGTAGCGCTAGGTTGACGCCGTGGTTGTGGGACCCGATCGACGACCCATTTGCATTCAGGGGAGTTACTCTGAGTTTGGTCCACGCAGACGCCTAACCGGAAGCACCCTCCGACGCTGCAACCAAAGTGC
GGGTAGCGCTAGGTTGACGCCGTGGTTGTGGGACCCGATCGACGACCTGACAGCCACTGGTCAGGAAAGGAAACAAGGCGCAGACGCCTAACCGGAAGCACCCTCCGACGCTGCAACCAAAGTGC
GGGTAGCGCTAGGTTGACGCCGTGGTTGTGGGACCCGATCGACGACCTCATGCAGCTGTGTTAGCCTCAACAAAGAAGGCCGCAGACGCCTAACCGGAAGCACCCTCCGACGCTGCAACCAAAGTGC
GGGTAGCGCTAGGTTGACGCCGTGGTTGTGGGACCCGATCGACGACCAGGAATACACTATGCTCAACCAGGGGAATGCTGCCGCAGACGCCTAACCGGAAGCACCCTCCGACGCTGCAACCAAAGTGC
GGGTAGCGCTAGGTTGACGCCGTGGTTGTGGGACCCGATCGACGACCACGTGCAACCAGCTTCCTTCTCCCAAACACCGCAGACGCCTAACCGGAAGCACCCTCCGACGCTGCAACCAAAGTGC
GGGTAGCGCTAGGTTGACGCCGTGGTTGTGGGACCCGATCGACGACCAAGAATTCATGTCAAAGCCACAGACACAATCTGGGCCGCAGACGCCTAACCGGAAGCACCCTCCGACGCTGCAACCAAAGTGC
GGGTAGCGCTAGGTTGACGCCGTGGTTGTGGGACCCGATCGACGACCGGGGTGAAGAATCTGGATTCCCTCAGTTGGTTTGACGCAGACGCCTAACCGGAAGCACCCTCCGACGCTGCAACCAAAGTGC
GGGTAGCGCTAGGTTGACGCCGTGGTTGTGGGACCCGATCGACGACCATTATCATCACCTCACAGGCATACCATAGTTCCAGCCCGCAGACGCCTAACCGGAAGCACCCTCCGACGCTGCAACCAAAGTGC
GGGTAGCGCTAGGTTGACGCCGTGGTTGTGGGACCCGATCGACGACCAAGGAAAGACGACTAGCGATGCATAGAGTTCAGGATGCGCAGACGCCTAACCGGAAGCACCCTCCGACGCTGCAACCAAAGTGC
GGGTAGCGCTAGGTTGACGCCGTGGTTGTGGGACCCGATCGACGACCAGGAGGCCTTTGCTATCAAGTGCAGAAAGAGAACACGCAGACGCCTAACCGGAAGCACCCTCCGACGCTGCAACCAAAGTGC
GGGTAGCGCTAGGTTGACGCCGTGGTTGTGGGACCCGATCGACGACCTACTTCCTTTTGCTTTTGTTTAGAGCTCCCTTGGGGACGCAGACGCCTAACCGGAAGCACCCTCCGACGCTGCAACCAAAGTGC
GGGTAGCGCTAGGTTGACGCCGTGGTTGTGGGACCCGATCGACGACCAGAGAGGAAGCATGAAGTGGCAAAAGAGAGAGGTCGCAGACGCCTAACCGGAAGCACCCTCCGACGCTGCAACCAAAGTGC
GGGTAGCGCTAGGTTGACGCCGTGGTTGTGGGACCCGATCGACGACCTCAAGAGAGCAAAGTGATAGAGCTGGAAAGACCAAGCCGCAGACGCCTAACCGGAAGCACCCTCCGACGCTGCAACCAAAGTGC
GGGTAGCGCTAGGTTGACGCCGTGGTTGTGGGACCCGATCGACGACCAGGATTTGGGATTTATAGGGAAACAACCCTAGCCCCCGCAGACGCCTAACCGGAAGCACCCTCCGACGCTGCAACCAAAGTGC
GGGTAGCGCTAGGTTGACGCCGTGGTTGTGGGACCCGATCGACGACCACTTCCTCTCAATGCATTGGTGGAGGTTGGGCGCAGACGCCTAACCGGAAGCACCCTCCGACGCTGCAACCAAAGTGC
GGGTAGCGCTAGGTTGACGCCGTGGTTGTGGGACCCGATCGACGACCGCTGCAAGGTGAAGGACCACGTAATACAAGCTCGCAGACGCCTAACCGGAAGCACCCTCCGACGCTGCAACCAAAGTGC
GGGTAGCGCTAGGTTGACGCCGTGGTTGTGGGACCCGATCGACGACCTTTTGAGAAAAGCATTTTCCTAGCCCAGGGCATGGCGCAGACGCCTAACCGGAAGCACCCTCCGACGCTGCAACCAAAGTGC
GGGTAGCGCTAGGTTGACGCCGTGGTTGTGGGACCCGATCGACGACCAGGTCTTATCTAAAGCAAGCCAGATGGACACAAAGCTCGCAGACGCCTAACCGGAAGCACCCTCCGACGCTGCAACCAAAGTGC
GGGTAGCGCTAGGTTGACGCCGTGGTTGTGGGACCCGATCGACGACCTTTAGCTGACAATGCAGGCAGGGGCTTCAACGCAGACGCCTAACCGGAAGCACCCTCCGACGCTGCAACCAAAGTGC
GGGTAGCGCTAGGTTGACGCCGTGGTTGTGGGACCCGATCGACGACCACATTCTAAAAGTAAGGCCACAGAAGGAGGGATGTGGCGCAGACGCCTAACCGGAAGCACCCTCCGACGCTGCAACCAAAGTGC
GGGTAGCGCTAGGTTGACGCCGTGGTTGTGGGACCCGATCGACGACCAATAAAGACATAGCCAGAGGAAAGCTGCAAACAAGCCCGCAGACGCCTAACCGGAAGCACCCTCCGACGCTGCAACCAAAGTGC
GGGTAGCGCTAGGTTGACGCCGTGGTTGTGGGACCCGATCGACGACCACCCCTAAAGGGTAGAGTCCACGTAAGGTTTGGCGCAGACGCCTAACCGGAAGCACCCTCCGACGCTGCAACCAAAGTGC
GGGTAGCGCTAGGTTGACGCCGTGGTTGTGGGACCCGATCGACGACCAAGGGAAGGGCCGAGACAAGATCCCAGGACCGCAGACGCCTAACCGGAAGCACCCTCCGACGCTGCAACCAAAGTGC
GGGTAGCGCTAGGTTGACGCCGTGGTTGTGGGACCCGATCGACGACCACTTGCTGATCTTTTCACCTGAGGTGAGGTAAGGTCGCAGACGCCTAACCGGAAGCACCCTCCGACGCTGCAACCAAAGTGC
GGGTAGCGCTAGGTTGACGCCGTGGTTGTGGGACCCGATCGACGACCGTCAGGAGCAAGCAATCCCACCCCTCTGGCCGCAGACGCCTAACCGGAAGCACCCTCCGACGCTGCAACCAAAGTGC
GGGTAGCGCTAGGTTGACGCCGTGGTTGTGGGACCCGATCGACGACCAGAGGCTTCACCTTCTCATCTCCTCATATGTGCTACTCGCAGACGCCTAACCGGAAGCACCCTCCGACGCTGCAACCAAAGTGC
GGGTAGCGCTAGGTTGACGCCGTGGTTGTGGGACCCGATCGACGACCCTAGAGATTTCCCATTTCCAAGCATCCCAAACAGTGCCGCAGACGCCTAACCGGAAGCACCCTCCGACGCTGCAACCAAAGTGC
GGGTAGCGCTAGGTTGACGCCGTGGTTGTGGGACCCGATCGACGACCTTCCAAATGTAACTTACCCACCAGTATAGCGTGGAGGCGCAGACGCCTAACCGGAAGCACCCTCCGACGCTGCAACCAAAGTGC
GGGTAGCGCTAGGTTGACGCCGTGGTTGTGGGACCCGATCGACGACCTATAGACAAAATGGAGTCATGGAGGCTCCAAGGCTTCGCAGACGCCTAACCGGAAGCACCCTCCGACGCTGCAACCAAAGTGC
GGGTAGCGCTAGGTTGACGCCGTGGTTGTGGGACCCGATCGACGACCTCAGAAGTTACAGGTGACCTCAGATCTCCTCTCTTGCCGCAGACGCCTAACCGGAAGCACCCTCCGACGCTGCAACCAAAGTGC
GGGTAGCGCTAGGTTGACGCCGTGGTTGTGGGACCCGATCGACGACCGCTGAGCAAATATGACCTCCTTGCTAAATCCAATCGCCGCAGACGCCTAACCGGAAGCACCCTCCGACGCTGCAACCAAAGTGC
GGGTAGCGCTAGGTTGACGCCGTGGTTGTGGGACCCGATCGACGACCTTTTGGTGGAGCCATTTACCAAGGGGAGGCCGCAGACGCCTAACCGGAAGCACCCTCCGACGCTGCAACCAAAGTGC
GGGTAGCGCTAGGTTGACGCCGTGGTTGTGGGACCCGATCGACGACCTAGCTTGTCTTGTTCAAACCTAGTCATGAACTGGCCACGCAGACGCCTAACCGGAAGCACCCTCCGACGCTGCAACCAAAGTGC
GGGTAGCGCTAGGTTGACGCCGTGGTTGTGGGACCCGATCGACGACCCTCTCAGGGAACTCATCTCACAATCTAAGCCTCTTGCCGCAGACGCCTAACCGGAAGCACCCTCCGACGCTGCAACCAAAGTGC
GGGTAGCGCTAGGTTGACGCCGTGGTTGTGGGACCCGATCGACGACCAAAGTAGCCTGTGAATGCAGTCATAGCAAGCTACAGCCGCAGACGCCTAACCGGAAGCACCCTCCGACGCTGCAACCAAAGTGC
GGGTAGCGCTAGGTTGACGCCGTGGTTGTGGGACCCGATCGACGACCTTCACCCTACATGGCTATTTAGGCCCAAACTTAAGCCCGCAGACGCCTAACCGGAAGCACCCTCCGACGCTGCAACCAAAGTGC
GGGTAGCGCTAGGTTGACGCCGTGGTTGTGGGACCCGATCGACGACCAACCAGTCATGCCAGGCATAACACCTTTCTTATCTGTCGCAGACGCCTAACCGGAAGCACCCTCCGACGCTGCAACCAAAGTGC
GGGTAGCGCTAGGTTGACGCCGTGGTTGTGGGACCCGATCGACGACCCTCTCACCTCTGCTTTGCTCTTCCTGAGCAATGCGCAGACGCCTAACCGGAAGCACCCTCCGACGCTGCAACCAAAGTGC
GGGTAGCGCTAGGTTGACGCCGTGGTTGTGGGACCCGATCGACGACCTGGGGCCCATGCCTTTCTGAGGAACAGAGGCGCAGACGCCTAACCGGAAGCACCCTCCGACGCTGCAACCAAAGTGC
GGGTAGCGCTAGGTTGACGCCGTGGTTGTGGGACCCGATCGACGACCACAACTTTACAAAACCTTCCTTCACCCCTCAATGCAGCGCAGACGCCTAACCGGAAGCACCCTCCGACGCTGCAACCAAAGTGC
GGGTAGCGCTAGGTTGACGCCGTGGTTGTGGGACCCGATCGACGACCGGTAGAGAGAGTGGCTGTATGTGCTGTATTAACAGGCCGCAGACGCCTAACCGGAAGCACCCTCCGACGCTGCAACCAAAGTGC
GGGTAGCGCTAGGTTGACGCCGTGGTTGTGGGACCCGATCGACGACCAGTTCTAAGTCCTTTCTAACCACCTGACTTTGTGCGGCGCAGACGCCTAACCGGAAGCACCCTCCGACGCTGCAACCAAAGTGC
GGGTAGCGCTAGGTTGACGCCGTGGTTGTGGGACCCGATCGACGACCAAGGTCCAAACACCATTAGGCAAACCCCAGTCGCAGACGCCTAACCGGAAGCACCCTCCGACGCTGCAACCAAAGTGC
GGGTAGCGCTAGGTTGACGCCGTGGTTGTGGGACCCGATCGACGACCAATGTTACAAGCACAGTGACCTATCCCAGAGCAACTCGCAGACGCCTAACCGGAAGCACCCTCCGACGCTGCAACCAAAGTGC
GGGTAGCGCTAGGTTGACGCCGTGGTTGTGGGACCCGATCGACGACCTTTTACCACGCCTTTGAGTGGAAGCAGAATTTGAACTCGCAGACGCCTAACCGGAAGCACCCTCCGACGCTGCAACCAAAGTGC
GGGTAGCGCTAGGTTGACGCCGTGGTTGTGGGACCCGATCGACGACCAATTCTTGTGGAGCCTTCAACCTCCATAAAGTGTGCCGCAGACGCCTAACCGGAAGCACCCTCCGACGCTGCAACCAAAGTGC
GGGTAGCGCTAGGTTGACGCCGTGGTTGTGGGACCCGATCGACGACCAAGCGTTTGGGTCTCTGAGGGAAAAGTTAAAGAGGACGCAGACGCCTAACCGGAAGCACCCTCCGACGCTGCAACCAAAGTGC
GGGTAGCGCTAGGTTGACGCCGTGGTTGTGGGACCCGATCGACGACCTTCTGAGATGTCTAGAGTGCCCAAGAACAGCAAATGTCGCAGACGCCTAACCGGAAGCACCCTCCGACGCTGCAACCAAAGTGC
GGGTAGCGCTAGGTTGACGCCGTGGTTGTGGGACCCGATCGACGACCACTGTTTAGAACCTTCCACTGATCCAGAAGGCAGTCGCAGACGCCTAACCGGAAGCACCCTCCGACGCTGCAACCAAAGTGC
GGGTAGCGCTAGGTTGACGCCGTGGTTGTGGGACCCGATCGACGACCACTATGTCTTTTGTTACAGGCTAGAAGCCCACCAACTCGCAGACGCCTAACCGGAAGCACCCTCCGACGCTGCAACCAAAGTGC
GGGTAGCGCTAGGTTGACGCCGTGGTTGTGGGACCCGATCGACGACCGCTAACAACCAGCTGGAGGGTAAGTCAAAAGCTATGACGCAGACGCCTAACCGGAAGCACCCTCCGACGCTGCAACCAAAGTGC
GGGTAGCGCTAGGTTGACGCCGTGGTTGTGGGACCCGATCGACGACCGAGCCCAGAAGGAGAACAATTATTTAGACCTGGAGGGCGCAGACGCCTAACCGGAAGCACCCTCCGACGCTGCAACCAAAGTGC
GGGTAGCGCTAGGTTGACGCCGTGGTTGTGGGACCCGATCGACGACCTGGGAAAGTCTTTGAAGGGTCTTCAGAAAATGGACCACGCAGACGCCTAACCGGAAGCACCCTCCGACGCTGCAACCAAAGTGC
GGGTAGCGCTAGGTTGACGCCGTGGTTGTGGGACCCGATCGACGACCTACTGAGAGGTGTTTGTGTAATCAAAGCAACCGAGGCCGCAGACGCCTAACCGGAAGCACCCTCCGACGCTGCAACCAAAGTGC
GGGTAGCGCTAGGTTGACGCCGTGGTTGTGGGACCCGATCGACGACCAAGATTAGAAAAGGGTAAAGGATGCCTGGAAAGCCGGCGCAGACGCCTAACCGGAAGCACCCTCCGACGCTGCAACCAAAGTGC
GGGTAGCGCTAGGTTGACGCCGTGGTTGTGGGACCCGATCGACGACCTCAGTTTGACATCGACAGTACAGGAAACCATTTGGGTCGCAGACGCCTAACCGGAAGCACCCTCCGACGCTGCAACCAAAGTGC
GGGTAGCGCTAGGTTGACGCCGTGGTTGTGGGACCCGATCGACGACCACACACCAACACATTAAAATCTTGAGAGAGAGGGCCACGCAGACGCCTAACCGGAAGCACCCTCCGACGCTGCAACCAAAGTGC
GGGTAGCGCTAGGTTGACGCCGTGGTTGTGGGACCCGATCGACGACCAAGCTAAGAATTTGGAGTTGTTGGCAAAACTGCCACACGCAGACGCCTAACCGGAAGCACCCTCCGACGCTGCAACCAAAGTGC
GGGTAGCGCTAGGTTGACGCCGTGGTTGTGGGACCCGATCGACGACCTCGTAGACTTATGCACATACTTCCACCAGAGAAGGGACGCAGACGCCTAACCGGAAGCACCCTCCGACGCTGCAACCAAAGTGC
GGGTAGCGCTAGGTTGACGCCGTGGTTGTGGGACCCGATCGACGACCAATTCCTTTGCTCTTCACCAAGAAGAGCCAACAGAGTCGCAGACGCCTAACCGGAAGCACCCTCCGACGCTGCAACCAAAGTGC
GGGTAGCGCTAGGTTGACGCCGTGGTTGTGGGACCCGATCGACGACCAAGGGACAAGTAACTGCACTTTTGACACACATCCTCTCACGGGAGTTGTGCGAAGGGTGCCCTCCGACGCTGCAACCAAAGTGC
GGGTAGCGCTAGGTTGACGCCGTGGTTGTGGGACCCGATCGACGACCAAAAGGTAGGGTGGGAGTGTTTCAAAGAACCAAGTCTCACGGGAGTTGTGCGAAGGGTGCCCTCCGACGCTGCAACCAAAGTGC
GGGTAGCGCTAGGTTGACGCCGTGGTTGTGGGACCCGATCGACGACCAGCATATACCACTTCCCCATATACACGTTCGAGCATGCACGGGAGTTGTGCGAAGGGTGCCCTCCGACGCTGCAACCAAAGTGC
GGGTAGCGCTAGGTTGACGCCGTGGTTGTGGGACCCGATCGACGACCGGGGAGCAGGAAGCTGGGTAATTGAATGCACACGGGAGTTGTGCGAAGGGTGCCCTCCGACGCTGCAACCAAAGTGC
GGGTAGCGCTAGGTTGACGCCGTGGTTGTGGGACCCGATCGACGACCGTTGTGCACACTGGCAATTTTCCCGCCACACACGGGAGTTGTGCGAAGGGTGCCCTCCGACGCTGCAACCAAAGTGC
GGGTAGCGCTAGGTTGACGCCGTGGTTGTGGGACCCGATCGACGACCTACCATTTCTTCGGTGTCTCTCCCAAAATTCTCCTCCCACGGGAGTTGTGCGAAGGGTGCCCTCCGACGCTGCAACCAAAGTGC
GGGTAGCGCTAGGTTGACGCCGTGGTTGTGGGACCCGATCGACGACCAACAATCTTCCTAAGGTCTCTGCAACATTTTGTGGCCCACGGGAGTTGTGCGAAGGGTGCCCTCCGACGCTGCAACCAAAGTGC
GGGTAGCGCTAGGTTGACGCCGTGGTTGTGGGACCCGATCGACGACCTCACAGAACAGGGTCATCTTTGACTTCTACACCAAGGCACGGGAGTTGTGCGAAGGGTGCCCTCCGACGCTGCAACCAAAGTGC
GGGTAGCGCTAGGTTGACGCCGTGGTTGTGGGACCCGATCGACGACCCCTCTATCTTCATATGCCCTTGCTGGGATCCGACACGGGAGTTGTGCGAAGGGTGCCCTCCGACGCTGCAACCAAAGTGC
GGGTAGCGCTAGGTTGACGCCGTGGTTGTGGGACCCGATCGACGACCTGTTCCACTTGGCCAGCTACCTATATTCTCATCAAGGCACGGGAGTTGTGCGAAGGGTGCCCTCCGACGCTGCAACCAAAGTGC
GGGTAGCGCTAGGTTGACGCCGTGGTTGTGGGACCCGATCGACGACCGAGAGTTGGCCACAGGTAATACCACATCAAAGTGCCACGGGAGTTGTGCGAAGGGTGCCCTCCGACGCTGCAACCAAAGTGC
GGGTAGCGCTAGGTTGACGCCGTGGTTGTGGGACCCGATCGACGACCTTTAACTGCCCTTCCACTACTACAACAGCTACTGTGCCACGGGAGTTGTGCGAAGGGTGCCCTCCGACGCTGCAACCAAAGTGC
GGGTAGCGCTAGGTTGACGCCGTGGTTGTGGGACCCGATCGACGACCATTTCCAGCTCAGTCCGTTTAACTAGCTTCATTCCCACACGGGAGTTGTGCGAAGGGTGCCCTCCGACGCTGCAACCAAAGTGC
GGGTAGCGCTAGGTTGACGCCGTGGTTGTGGGACCCGATCGACGACCTTTGCTAGAGAGGACTCTCAGAAGAATGTGGGGAACTCACGGGAGTTGTGCGAAGGGTGCCCTCCGACGCTGCAACCAAAGTGC
GGGTAGCGCTAGGTTGACGCCGTGGTTGTGGGACCCGATCGACGACCTTGCTTGGTTATAGGTTGATCATTGAAGCCCAGTGGACACGGGAGTTGTGCGAAGGGTGCCCTCCGACGCTGCAACCAAAGTGC
GGGTAGCGCTAGGTTGACGCCGTGGTTGTGGGACCCGATCGACGACCTTAATCATTTTCCAAGGAGCTGGTCTCCCTTGAACCACACGGGAGTTGTGCGAAGGGTGCCCTCCGACGCTGCAACCAAAGTGC
GGGTAGCGCTAGGTTGACGCCGTGGTTGTGGGACCCGATCGACGACCGCCCCTTGCAGTCATTGTTCTCCTGACTGATGCACGGGAGTTGTGCGAAGGGTGCCCTCCGACGCTGCAACCAAAGTGC
GGGTAGCGCTAGGTTGACGCCGTGGTTGTGGGACCCGATCGACGACCTCCTATGCAGGATCTAATTCCTACTCATGCCAGAGCACACGGGAGTTGTGCGAAGGGTGCCCTCCGACGCTGCAACCAAAGTGC
GGGTAGCGCTAGGTTGACGCCGTGGTTGTGGGACCCGATCGACGACCAGCCAGGAGAAGCTCTACCAACTCCTGGGACACGGGAGTTGTGCGAAGGGTGCCCTCCGACGCTGCAACCAAAGTGC
GGGTAGCGCTAGGTTGACGCCGTGGTTGTGGGACCCGATCGACGACCTGGCCAGAGACAACTTTTATAAGCTTCCAGGAAGTGGCACGGGAGTTGTGCGAAGGGTGCCCTCCGACGCTGCAACCAAAGTGC
GGGTAGCGCTAGGTTGACGCCGTGGTTGTGGGACCCGATCGACGACCAAAAGCCAAAACACACAAGGTCAAGGGAGCTGACACGGGAGTTGTGCGAAGGGTGCCCTCCGACGCTGCAACCAAAGTGC
GGGTAGCGCTAGGTTGACGCCGTGGTTGTGGGACCCGATCGACGACCGAATCAAAGACTGTGATGACAGGCAAGGCTGTGGCACGGGAGTTGTGCGAAGGGTGCCCTCCGACGCTGCAACCAAAGTGC
GGGTAGCGCTAGGTTGACGCCGTGGTTGTGGGACCCGATCGACGACCATGGAGTGCACCCAAGAGTTCTCTTTCATAAGGGATTCACGGGAGTTGTGCGAAGGGTGCCCTCCGACGCTGCAACCAAAGTGC
GGGTAGCGCTAGGTTGACGCCGTGGTTGTGGGACCCGATCGACGACCGATGATGTGCTTGGGGCGGGCTGGCCATTTCACGGGAGTTGTGCGAAGGGTGCCCTCCGACGCTGCAACCAAAGTGC
GGGTAGCGCTAGGTTGACGCCGTGGTTGTGGGACCCGATCGACGACCAAAACGTACAAAGTCCAACCCATGCCTAAGTGAGTGTCACGGGAGTTGTGCGAAGGGTGCCCTCCGACGCTGCAACCAAAGTGC
GGGTAGCGCTAGGTTGACGCCGTGGTTGTGGGACCCGATCGACGACCACGATAGTGAGAGTATTAAGTCCCTTTGAAGGCGGGCCACGGGAGTTGTGCGAAGGGTGCCCTCCGACGCTGCAACCAAAGTGC
GGGTAGCGCTAGGTTGACGCCGTGGTTGTGGGACCCGATCGACGACCTTGTCAGCCTCATCCACATTTCAAGTCAATTCTGCTGCACGGGAGTTGTGCGAAGGGTGCCCTCCGACGCTGCAACCAAAGTGC
GGGTAGCGCTAGGTTGACGCCGTGGTTGTGGGACCCGATCGACGACCTTTTCACAGGTCGAGTGTGCGGTTTCCATTTAGCCACGGGAGTTGTGCGAAGGGTGCCCTCCGACGCTGCAACCAAAGTGC
GGGTAGCGCTAGGTTGACGCCGTGGTTGTGGGACCCGATCGACGACCACACAGGCCTTCCACCCGGGAAAGTCCAGCCACGGGAGTTGTGCGAAGGGTGCCCTCCGACGCTGCAACCAAAGTGC
GGGTAGCGCTAGGTTGACGCCGTGGTTGTGGGACCCGATCGACGACCTTGGCAGTGGCATTTCCATCCATCTCACCACACGGGAGTTGTGCGAAGGGTGCCCTCCGACGCTGCAACCAAAGTGC
GGGTAGCGCTAGGTTGACGCCGTGGTTGTGGGACCCGATCGACGACCAGTTACCTATCCACTGCTGTGTGCTTTCAGCGTCACGGGAGTTGTGCGAAGGGTGCCCTCCGACGCTGCAACCAAAGTGC
GGGTAGCGCTAGGTTGACGCCGTGGTTGTGGGACCCGATCGACGACCACTACCTGACACACGTCATCTTGAAATCTCAGGAGGACACGGGAGTTGTGCGAAGGGTGCCCTCCGACGCTGCAACCAAAGTGC
GGGTAGCGCTAGGTTGACGCCGTGGTTGTGGGACCCGATCGACGACCAATTACTGCCTACAACACACACACACGACCAGCCACGGGAGTTGTGCGAAGGGTGCCCTCCGACGCTGCAACCAAAGTGC
GGGTAGCGCTAGGTTGACGCCGTGGTTGTGGGACCCGATCGACGACCAATAGGATCTTTCTGTGGAACTTGGCCAACATGTCCACACGGGAGTTGTGCGAAGGGTGCCCTCCGACGCTGCAACCAAAGTGC
GGGTAGCGCTAGGTTGACGCCGTGGTTGTGGGACCCGATCGACGACCAAAGGAGATGGCATTGGTCAATCAGAAACCTGAAGGTCACGGGAGTTGTGCGAAGGGTGCCCTCCGACGCTGCAACCAAAGTGC
GGGTAGCGCTAGGTTGACGCCGTGGTTGTGGGACCCGATCGACGACCTCGAATTGGGGCGAATTTGTAATCCTATACACTGGGCCACGGGAGTTGTGCGAAGGGTGCCCTCCGACGCTGCAACCAAAGTGC
GGGTAGCGCTAGGTTGACGCCGTGGTTGTGGGACCCGATCGACGACCCAACTGGCATCAGAACTTCCACGGACTGTTGTCACGGGAGTTGTGCGAAGGGTGCCCTCCGACGCTGCAACCAAAGTGC
GGGTAGCGCTAGGTTGACGCCGTGGTTGTGGGACCCGATCGACGACCGAAGGCTTATTTCCATCTATCAGGATCTGCTGAGGCACACGGGAGTTGTGCGAAGGGTGCCCTCCGACGCTGCAACCAAAGTGC
GGGTAGCGCTAGGTTGACGCCGTGGTTGTGGGACCCGATCGACGACCTCAGCAGAGATTTACTCCACAGAATTCTAGGCAGCAGCACGGGAGTTGTGCGAAGGGTGCCCTCCGACGCTGCAACCAAAGTGC
GGGTAGCGCTAGGTTGACGCCGTGGTTGTGGGACCCGATCGACGACCTAAAAGCCTAGAGGTGAGTCGTGTGTGTGATAAGTGCCACGGGAGTTGTGCGAAGGGTGCCCTCCGACGCTGCAACCAAAGTGC
GGGTAGCGCTAGGTTGACGCCGTGGTTGTGGGACCCGATCGACGACCAAAACACCTCCACCTCTACACAATTTGTTGTTGGTGGCACGGGAGTTGTGCGAAGGGTGCCCTCCGACGCTGCAACCAAAGTGC
GGGTAGCGCTAGGTTGACGCCGTGGTTGTGGGACCCGATCGACGACCTAAATGGTAGGTATGATGTGCTGATCGGACAAAGGGCCACGGGAGTTGTGCGAAGGGTGCCCTCCGACGCTGCAACCAAAGTGC
GGGTAGCGCTAGGTTGACGCCGTGGTTGTGGGACCCGATCGACGACCAGAGGAGTTGGGAAGAGAAGTGTCATGAAAGGTGACCACGGGAGTTGTGCGAAGGGTGCCCTCCGACGCTGCAACCAAAGTGC
GGGTAGCGCTAGGTTGACGCCGTGGTTGTGGGACCCGATCGACGACCTGACTTTCCCTCTGTCCTCTCAGCTTACGTAAAACACCACGGGAGTTGTGCGAAGGGTGCCCTCCGACGCTGCAACCAAAGTGC
GGGTAGCGCTAGGTTGACGCCGTGGTTGTGGGACCCGATCGACGACCAATTATTTCGCTGAACTGTTGAGTCAGCAACACTGCGCACGGGAGTTGTGCGAAGGGTGCCCTCCGACGCTGCAACCAAAGTGC
GGGTAGCGCTAGGTTGACGCCGTGGTTGTGGGACCCGATCGACGACCACAGAGCACTGTCTTGTGAAGATGTTTTGTGGGATGTCACGGGAGTTGTGCGAAGGGTGCCCTCCGACGCTGCAACCAAAGTGC
GGGTAGCGCTAGGTTGACGCCGTGGTTGTGGGACCCGATCGACGACCAACTAGAGTCAGGAGTATGAAAGTGGGAAGGTTGGCCCACGGGAGTTGTGCGAAGGGTGCCCTCCGACGCTGCAACCAAAGTGC
GGGTAGCGCTAGGTTGACGCCGTGGTTGTGGGACCCGATCGACGACCATTGAAATAAACCTACCTGAGCCAGCTCCTATCCACCCACGGGAGTTGTGCGAAGGGTGCCCTCCGACGCTGCAACCAAAGTGC
GGGTAGCGCTAGGTTGACGCCGTGGTTGTGGGACCCGATCGACGACCTGATAGGATACAAAGAAGACTCACTGGCCTGTGGGTCACGGGAGTTGTGCGAAGGGTGCCCTCCGACGCTGCAACCAAAGTGC
GGGTAGCGCTAGGTTGACGCCGTGGTTGTGGGACCCGATCGACGACCTTTTCCCCTCTACCGATCATGGGAATTTCCAGTTCACACGGGAGTTGTGCGAAGGGTGCCCTCCGACGCTGCAACCAAAGTGC
GGGTAGCGCTAGGTTGACGCCGTGGTTGTGGGACCCGATCGACGACCGGAGTTTTGTTGGCATGCCGTCCTGGACAGCACGGGAGTTGTGCGAAGGGTGCCCTCCGACGCTGCAACCAAAGTGC
GGGTAGCGCTAGGTTGACGCCGTGGTTGTGGGACCCGATCGACGACCAGTGAGAGCAGGAGGACCTGGCCACACACGCACGGGAGTTGTGCGAAGGGTGCCCTCCGACGCTGCAACCAAAGTGC
GGGTAGCGCTAGGTTGACGCCGTGGTTGTGGGACCCGATCGACGACCATCGCTTTCCTTTCTCCAGTTAGAGGTTGGAAAGGTCACGGGAGTTGTGCGAAGGGTGCCCTCCGACGCTGCAACCAAAGTGC
GGGTAGCGCTAGGTTGACGCCGTGGTTGTGGGACCCGATCGACGACCATTCACCCACTCCTATTCACCCCAAAATAGGAGTGGCACGGGAGTTGTGCGAAGGGTGCCCTCCGACGCTGCAACCAAAGTGC
GGGTAGCGCTAGGTTGACGCCGTGGTTGTGGGACCCGATCGACGACCTGATTCATGGATGTCTTAACTTGCTCACTACTGCGCTCACGGGAGTTGTGCGAAGGGTGCCCTCCGACGCTGCAACCAAAGTGC
GGGTAGCGCTAGGTTGACGCCGTGGTTGTGGGACCCGATCGACGACCAGGATAACAAGCATTAACTGGGCACTTTCTTTGCTCCCACGGGAGTTGTGCGAAGGGTGCCCTCCGACGCTGCAACCAAAGTGC
GGGTAGCGCTAGGTTGACGCCGTGGTTGTGGGACCCGATCGACGACCTGACAGTAAGCAAAGATCAGGAGCAGGAGGCACACGGGAGTTGTGCGAAGGGTGCCCTCCGACGCTGCAACCAAAGTGC
GGGTAGCGCTAGGTTGACGCCGTGGTTGTGGGACCCGATCGACGACCTAGGAATGGTGGAGGGGTACAGTAGAAACTCCTTACCCACGGGAGTTGTGCGAAGGGTGCCCTCCGACGCTGCAACCAAAGTGC
GGGTAGCGCTAGGTTGACGCCGTGGTTGTGGGACCCGATCGACGACCTACATGAATGGTCCCAGGACAAAGCTAATGAAAGGGACACGGGAGTTGTGCGAAGGGTGCCCTCCGACGCTGCAACCAAAGTGC
GGGTAGCGCTAGGTTGACGCCGTGGTTGTGGGACCCGATCGACGACCTCTTCTATTTTGTCCACCTCTGGCATGACATGGAAGGCACGGGAGTTGTGCGAAGGGTGCCCTCCGACGCTGCAACCAAAGTGC
GGGTAGCGCTAGGTTGACGCCGTGGTTGTGGGACCCGATCGACGACCGCCAGGAATTCTCCAAAATGAAGGACAGTTTTAGGGGCACGGGAGTTGTGCGAAGGGTGCCCTCCGACGCTGCAACCAAAGTGC
GGGTAGCGCTAGGTTGACGCCGTGGTTGTGGGACCCGATCGACGACCACATGCTCAATCCTCTAAAGTGAGCTCAAAGATGCCTCACGGGAGTTGTGCGAAGGGTGCCCTCCGACGCTGCAACCAAAGTGC
GGGTAGCGCTAGGTTGACGCCGTGGTTGTGGGACCCGATCGACGACCAACCACATGCCAAAGTAGGGAGTTCTAAGAAGAGGACCACGGGAGTTGTGCGAAGGGTGCCCTCCGACGCTGCAACCAAAGTGC
GGGTAGCGCTAGGTTGACGCCGTGGTTGTGGGACCCGATCGACGACCGAAGTCCTCAGGCACACAGTCTTAAGGGTTGAAAGTCACGGGAGTTGTGCGAAGGGTGCCCTCCGACGCTGCAACCAAAGTGC
GGGTAGCGCTAGGTTGACGCCGTGGTTGTGGGACCCGATCGACGACCAAAGAATGTGAAAATGAACCTTGGCTGACAGAAGCCACACGGGAGTTGTGCGAAGGGTGCCCTCCGACGCTGCAACCAAAGTGC
GGGTAGCGCTAGGTTGACGCCGTGGTTGTGGGACCCGATCGACGACCCCTCACCCAGATATGCCAAGGAGATTACCCTCCCACGGGAGTTGTGCGAAGGGTGCCCTCCGACGCTGCAACCAAAGTGC
GGGTAGCGCTAGGTTGACGCCGTGGTTGTGGGACCCGATCGACGACCATTTGAGTTCCTGGCCATACTTCTGGTTATCACACCTCACGGGAGTTGTGCGAAGGGTGCCCTCCGACGCTGCAACCAAAGTGC
GGGTAGCGCTAGGTTGACGCCGTGGTTGTGGGACCCGATCGACGACCTACTGAACTGCTTCAGTGGTTCCTATGGAGGAACTGACACGGGAGTTGTGCGAAGGGTGCCCTCCGACGCTGCAACCAAAGTGC
GGGTAGCGCTAGGTTGACGCCGTGGTTGTGGGACCCGATCGACGACCTCAAGGCTGCCTTCAGCAGGAAGGTACTTGGCACGGGAGTTGTGCGAAGGGTGCCCTCCGACGCTGCAACCAAAGTGC
GGGTAGCGCTAGGTTGACGCCGTGGTTGTGGGACCCGATCGACGACCCGACCCAACTCCAGGGCCCTAGGCTCTAACCACGGGAGTTGTGCGAAGGGTGCCCTCCGACGCTGCAACCAAAGTGC
GGGTAGCGCTAGGTTGACGCCGTGGTTGTGGGACCCGATCGACGACCTTCTCACAAACCAGTTCCTTCAGAGGGAAGGCACACGGGAGTTGTGCGAAGGGTGCCCTCCGACGCTGCAACCAAAGTGC
GGGTAGCGCTAGGTTGACGCCGTGGTTGTGGGACCCGATCGACGACCATATACCTAAGGAGTCCAGGTTCTAGATCGCAGTGCACACGGGAGTTGTGCGAAGGGTGCCCTCCGACGCTGCAACCAAAGTGC
GGGTAGCGCTAGGTTGACGCCGTGGTTGTGGGACCCGATCGACGACCATTTGTCTGTTTCCCTGGAGCTAGGATTCATCCCTGCACGGGAGTTGTGCGAAGGGTGCCCTCCGACGCTGCAACCAAAGTGC
GGGTAGCGCTAGGTTGACGCCGTGGTTGTGGGACCCGATCGACGACCTAGTGAGCCTTCTGACTGCAGCTGATAGCATTCCCACGGGAGTTGTGCGAAGGGTGCCCTCCGACGCTGCAACCAAAGTGC
GGGTAGCGCTAGGTTGACGCCGTGGTTGTGGGACCCGATCGACGACCTCTACCACACCTTCCGATGGGGTGGTTCAGCACGGGAGTTGTGCGAAGGGTGCCCTCCGACGCTGCAACCAAAGTGC
GGGTAGCGCTAGGTTGACGCCGTGGTTGTGGGACCCGATCGACGACCAAATACACAAGCCTGGACATCTGAATGAGTTGGGACTCACGGGAGTTGTGCGAAGGGTGCCCTCCGACGCTGCAACCAAAGTGC
GGGTAGCGCTAGGTTGACGCCGTGGTTGTGGGACCCGATCGACGACCTTCTGGATCAATCATCCAGCCTTGAGGTAAGCTTTCACACGGGAGTTGTGCGAAGGGTGCCCTCCGACGCTGCAACCAAAGTGC
GGGTAGCGCTAGGTTGACGCCGTGGTTGTGGGACCCGATCGACGACCAGTGACTAACAAACATGGCAAGCATGTGCTGCACACGGGAGTTGTGCGAAGGGTGCCCTCCGACGCTGCAACCAAAGTGC
GGGTAGCGCTAGGTTGACGCCGTGGTTGTGGGACCCGATCGACGACCTACGTTTGTTAGTTTTCTCCTTTCTGCTAGGGGACGCCACGGGAGTTGTGCGAAGGGTGCCCTCCGACGCTGCAACCAAAGTGC
GGGTAGCGCTAGGTTGACGCCGTGGTTGTGGGACCCGATCGACGACCTTGGAGTCTCCTAAAGAGCCTAAATGGTTGTGGAAGCCACGGGAGTTGTGCGAAGGGTGCCCTCCGACGCTGCAACCAAAGTGC
GGGTAGCGCTAGGTTGACGCCGTGGTTGTGGGACCCGATCGACGACCATGCTCACAAACTGTGTAGCAATGAGATCCAAACACCCACGGGAGTTGTGCGAAGGGTGCCCTCCGACGCTGCAACCAAAGTGC
GGGTAGCGCTAGGTTGACGCCGTGGTTGTGGGACCCGATCGACGACCAAGTGCTCCAGAGCTTTTGGGATTGTCACAAATGCCACGGGAGTTGTGCGAAGGGTGCCCTCCGACGCTGCAACCAAAGTGC
GGGTAGCGCTAGGTTGACGCCGTGGTTGTGGGACCCGATCGACGACCCACTGTGGAGGAGGCAGATGCATGCATGGCCACGGGAGTTGTGCGAAGGGTGCCCTCCGACGCTGCAACCAAAGTGC
GGGTAGCGCTAGGTTGACGCCGTGGTTGTGGGACCCGATCGACGACCCACACAAGGGGATGGAAGAGTTGTACAACCAAAGAGCCACGGGAGTTGTGCGAAGGGTGCCCTCCGACGCTGCAACCAAAGTGC
GGGTAGCGCTAGGTTGACGCCGTGGTTGTGGGACCCGATCGACGACCTATCTCAGGAGAAGATTCTCAGAGACCAAGTGCCCACACGGGAGTTGTGCGAAGGGTGCCCTCCGACGCTGCAACCAAAGTGC
GGGTAGCGCTAGGTTGACGCCGTGGTTGTGGGACCCGATCGACGACCCTTTGGCGGCAGCTGTGATAGTAGTGGATATGGTCACGGGAGTTGTGCGAAGGGTGCCCTCCGACGCTGCAACCAAAGTGC
GGGTAGCGCTAGGTTGACGCCGTGGTTGTGGGACCCGATCGACGACCATGGATTTGGTAATGACACTGGTTATGGAGGAGGTGGCACGGGAGTTGTGCGAAGGGTGCCCTCCGACGCTGCAACCAAAGTGC
GGGTAGCGCTAGGTTGACGCCGTGGTTGTGGGACCCGATCGACGACCCCCTGGTTACTCTGAAGAAAGCCAAGGCTATGGACACGGGAGTTGTGCGAAGGGTGCCCTCCGACGCTGCAACCAAAGTGC
GGGTAGCGCTAGGTTGACGCCGTGGTTGTGGGACCCGATCGACGACCAGTGGTGGAGAGGGTTGTAGAAACAAGGGCACACGGGAGTTGTGCGAAGGGTGCCCTCCGACGCTGCAACCAAAGTGC
GGGTAGCGCTAGGTTGACGCCGTGGTTGTGGGACCCGATCGACGACCGTGGCTTCTGTGACAGCTATAACGACGGAAGCCACGGGAGTTGTGCGAAGGGTGCCCTCCGACGCTGCAACCAAAGTGC
GGGTAGCGCTAGGTTGACGCCGTGGTTGTGGGACCCGATCGACGACCAGAAGGGGCTTTGGCAGTGGTAGTGGAAGCCACGGGAGTTGTGCGAAGGGTGCCCTCCGACGCTGCAACCAAAGTGC
GGGTAGCGCTAGGTTGACGCCGTGGTTGTGGGACCCGATCGACGACCAGATTTTGAACCCATGAAGGCAGGAAACTTTGAAGGCCACGGGAGTTGTGCGAAGGGTGCCCTCCGACGCTGCAACCAAAGTGC
GGGTAGCGCTAGGTTGACGCCGTGGTTGTGGGACCCGATCGACGACCTATGGTGGTTCCAGTAGCAACAGTAGCTACAGCAGCACGGGAGTTGTGCGAAGGGTGCCCTCCGACGCTGCAACCAAAGTGC
GGGTAGCGCTAGGTTGACGCCGTGGTTGTGGGACCCGATCGACGACCTGGACTTCTCTCTATAAAGCTACCCAATTGGGTCCCACACGGGAGTTGTGCGAAGGGTGCCCTCCGACGCTGCAACCAAAGTGC
GGGTAGCGCTAGGTTGACGCCGTGGTTGTGGGACCCGATCGACGACCTCTTTCAAGATAAACTAGCACCCCACTCTAGCCCAGCCACGGGAGTTGTGCGAAGGGTGCCCTCCGACGCTGCAACCAAAGTGC
GGGTAGCGCTAGGTTGACGCCGTGGTTGTGGGACCCGATCGACGACCTGGCTGACTCTCAGAGCATCATATTTTCCACTGATGGCACGGGAGTTGTGCGAAGGGTGCCCTCCGACGCTGCAACCAAAGTGC
GGGTAGCGCTAGGTTGACGCCGTGGTTGTGGGACCCGATCGACGACCTACATCTACAATGTAGAGGGCTTGTCTTCAGCTCCCTCACGGGAGTTGTGCGAAGGGTGCCCTCCGACGCTGCAACCAAAGTGC
GGGTAGCGCTAGGTTGACGCCGTGGTTGTGGGACCCGATCGACGACCCTTTGCAGATTTCACAATGGAGAAGAGCTGTCACAGGCACGGGAGTTGTGCGAAGGGTGCCCTCCGACGCTGCAACCAAAGTGC
GGGTAGCGCTAGGTTGACGCCGTGGTTGTGGGACCCGATCGACGACCTTTTCTTCCAGTGCTGGAAGGCAGTCAGGAACCACGGGAGTTGTGCGAAGGGTGCCCTCCGACGCTGCAACCAAAGTGC
GGGTAGCGCTAGGTTGACGCCGTGGTTGTGGGACCCGATCGACGACCGGGGCAATGGCATAGCAGGTGAATGCATTTGCACGGGAGTTGTGCGAAGGGTGCCCTCCGACGCTGCAACCAAAGTGC
GGGTAGCGCTAGGTTGACGCCGTGGTTGTGGGACCCGATCGACGACCGACCAGATGGATCTGGAAACAGTTTAATCCTCAGGGCCACGGGAGTTGTGCGAAGGGTGCCCTCCGACGCTGCAACCAAAGTGC
GGGTAGCGCTAGGTTGACGCCGTGGTTGTGGGACCCGATCGACGACCAAACCTGTATGTCAGTCTTTCTGGCTTTAGGCCTGTCACGGGAGTTGTGCGAAGGGTGCCCTCCGACGCTGCAACCAAAGTGC
GGGTAGCGCTAGGTTGACGCCGTGGTTGTGGGACCCGATCGACGACCTTTTGCATATCATCTGGCAAGTGAGCAGGTGCACACGGGAGTTGTGCGAAGGGTGCCCTCCGACGCTGCAACCAAAGTGC
GGGTAGCGCTAGGTTGACGCCGTGGTTGTGGGACCCGATCGACGACCCCGACCCCACCACCACTGCCTCAGAGCAAACACGGGAGTTGTGCGAAGGGTGCCCTCCGACGCTGCAACCAAAGTGC
GGGTAGCGCTAGGTTGACGCCGTGGTTGTGGGACCCGATCGACGACCCCCCTCCCTACTCCCACCCACCAGGCAAGAAACACGGGAGTTGTGCGAAGGGTGCCCTCCGACGCTGCAACCAAAGTGC
GGGTAGCGCTAGGTTGACGCCGTGGTTGTGGGACCCGATCGACGACCAATCTCTGAGTGCTCAACATGGAATGGAAAACCCAGACACGGGAGTTGTGCGAAGGGTGCCCTCCGACGCTGCAACCAAAGTGC
GGGTAGCGCTAGGTTGACGCCGTGGTTGTGGGACCCGATCGACGACCAGAGCAAGGTTGGAAATTGTAGCTGGGAAGTCTCACACGGGAGTTGTGCGAAGGGTGCCCTCCGACGCTGCAACCAAAGTGC
GGGTAGCGCTAGGTTGACGCCGTGGTTGTGGGACCCGATCGACGACCAGTTCTCTGGTTCCTCCTGGAAGAGGGCATCACGGGAGTTGTGCGAAGGGTGCCCTCCGACGCTGCAACCAAAGTGC
GGGTAGCGCTAGGTTGACGCCGTGGTTGTGGGACCCGATCGACGACCATCCACAAATATTGACCATCAGTTTGGGATTGGCAGCCACGGGAGTTGTGCGAAGGGTGCCCTCCGACGCTGCAACCAAAGTGC
GGGTAGCGCTAGGTTGACGCCGTGGTTGTGGGACCCGATCGACGACCACAAGTTATAGCGCCGTTACCTTAGATGCACACATGCCACGGGAGTTGTGCGAAGGGTGCCCTCCGACGCTGCAACCAAAGTGC
GGGTAGCGCTAGGTTGACGCCGTGGTTGTGGGACCCGATCGACGACCATATGCTTCCTATGTCTTTCTAGAGGCCCAAGCACACCACGGGAGTTGTGCGAAGGGTGCCCTCCGACGCTGCAACCAAAGTGC
GGGTAGCGCTAGGTTGACGCCGTGGTTGTGGGACCCGATCGACGACCACCTCCCTCATTTATTGCCTCCTATTCAACTTGCGCCACGGGAGTTGTGCGAAGGGTGCCCTCCGACGCTGCAACCAAAGTGC
GGGTAGCGCTAGGTTGACGCCGTGGTTGTGGGACCCGATCGACGACCAGATTGTGTTTACAGGGTTCCACTGCACATCTCATCCCACGGGAGTTGTGCGAAGGGTGCCCTCCGACGCTGCAACCAAAGTGC
GGGTAGCGCTAGGTTGACGCCGTGGTTGTGGGACCCGATCGACGACCCCAAACCTGCACCATATTTATTGGGTGACTTTAGGCCCACGGGAGTTGTGCGAAGGGTGCCCTCCGACGCTGCAACCAAAGTGC
GGGTAGCGCTAGGTTGACGCCGTGGTTGTGGGACCCGATCGACGACCCCCCAAGCATAAAGGATCTAAATGGGGCAATGTGGCACGGGAGTTGTGCGAAGGGTGCCCTCCGACGCTGCAACCAAAGTGC
GGGTAGCGCTAGGTTGACGCCGTGGTTGTGGGACCCGATCGACGACCCTAATGGCCCCTAGAGGGCAGCAGAGGAATCACGGGAGTTGTGCGAAGGGTGCCCTCCGACGCTGCAACCAAAGTGC
GGGTAGCGCTAGGTTGACGCCGTGGTTGTGGGACCCGATCGACGACCAAGAACAGAGTGGACGACAGGTTCAGAGAAAGATGTCCACGGGAGTTGTGCGAAGGGTGCCCTCCGACGCTGCAACCAAAGTGC
GGGTAGCGCTAGGTTGACGCCGACGCTGCAACCAAAGTGC
GGGTAGCGCTAGGTTGACGCCGTGGTTGTGGGACCCGATCGACGACCGAGACTGAGCTCAGGGCCATTTATAGCCTGCTGGAGGCTCGCACGGTGATTGCACAGGGCGACGCTGCAACCAAAGTGC
GGGTAGCGCTAGGTTGACGCCGTGGTTGTGGGACCCGATCGACGACCAATGAGAAGGATCCAGTCATGCATCTGAGAGCATACGGGAGGCTCGCACGGTGATTGCACAGGGCGACGCTGCAACCAAAGTGC
GGGTAGCGCTAGGTTGACGCCGTGGTTGTGGGACCCGATCGACGACCACTAGATCTGGGCTATCCTTTCTTAGTGTCCTGTGGTGGAGGCTCGCACGGTGATTGCACAGGGCGACGCTGCAACCAAAGTGC
GGGTAGCGCTAGGTTGACGCCGTGGTTGTGGGACCCGATCGACGACCTTTGGCTTTAAGTGGATGAGGAGGAAAGGTACTGTGGGGAGGCTCGCACGGTGATTGCACAGGGCGACGCTGCAACCAAAGTGC
GGGTAGCGCTAGGTTGACGCCGTGGTTGTGGGACCCGATCGACGACCGGGGTAGGTATAGAGGAGAGGAAGAGAACCCGAGGGAGGCTCGCACGGTGATTGCACAGGGCGACGCTGCAACCAAAGTGC
GGGTAGCGCTAGGTTGACGCCGTGGTTGTGGGACCCGATCGACGACCTTCCAGTCTACTTCACTGATTAGGCCTGACACCTAGGGGAGGCTCGCACGGTGATTGCACAGGGCGACGCTGCAACCAAAGTGC
GGGTAGCGCTAGGTTGACGCCGTGGTTGTGGGACCCGATCGACGACCTGTAAGACTTGGAGTTTGAACAGCGGTACTTTGCTCCGGAGGCTCGCACGGTGATTGCACAGGGCGACGCTGCAACCAAAGTGC
GGGTAGCGCTAGGTTGACGCCGTGGTTGTGGGACCCGATCGACGACCCCAGGCAACAAAGTTCTGCATCAAGCTGGAAAATGGGAGGCTCGCACGGTGATTGCACAGGGCGACGCTGCAACCAAAGTGC
GGGTAGCGCTAGGTTGACGCCGTGGTTGTGGGACCCGATCGACGACCAACACTTGCCCACTTTTCCCTGAAATACAGCAGGGGAGGCTCGCACGGTGATTGCACAGGGCGACGCTGCAACCAAAGTGC
GGGTAGCGCTAGGTTGACGCCGTGGTTGTGGGACCCGATCGACGACCGTCCTGGCTCCATGGAAGCTCTGGTGAAATCGGAGGCTCGCACGGTGATTGCACAGGGCGACGCTGCAACCAAAGTGC
GGGTAGCGCTAGGTTGACGCCGTGGTTGTGGGACCCGATCGACGACCAAACAGATGAAAATGGACTGCTTTGGTCAACGTGACAGGAGGCTCGCACGGTGATTGCACAGGGCGACGCTGCAACCAAAGTGC
GGGTAGCGCTAGGTTGACGCCGTGGTTGTGGGACCCGATCGACGACCCTTGGAGCCCCTAAAGCCAGGATGGCCTCAGGAGGCTCGCACGGTGATTGCACAGGGCGACGCTGCAACCAAAGTGC
GGGTAGCGCTAGGTTGACGCCGTGGTTGTGGGACCCGATCGACGACCTAAACCCCTCAGTGGTGAGGCTCAGTGGCAGGAGGCTCGCACGGTGATTGCACAGGGCGACGCTGCAACCAAAGTGC
GGGTAGCGCTAGGTTGACGCCGTGGTTGTGGGACCCGATCGACGACCCCTGGCTGCAGGCTCCCCAAGTCTGTGACAGGAGGCTCGCACGGTGATTGCACAGGGCGACGCTGCAACCAAAGTGC
GGGTAGCGCTAGGTTGACGCCGTGGTTGTGGGACCCGATCGACGACCCCCAGCAGGAGAGGGACAATCTCCTGAGACGGAGGCTCGCACGGTGATTGCACAGGGCGACGCTGCAACCAAAGTGC
GGGTAGCGCTAGGTTGACGCCGTGGTTGTGGGACCCGATCGACGACCGACACCTGAGAGATGCATGCCAGGAAGGTAGCGGAGGCTCGCACGGTGATTGCACAGGGCGACGCTGCAACCAAAGTGC
GGGTAGCGCTAGGTTGACGCCGTGGTTGTGGGACCCGATCGACGACCATGAGCAGATTTATCTCTGAGCATATGCCCTGATGGCGGAGGCTCGCACGGTGATTGCACAGGGCGACGCTGCAACCAAAGTGC
GGGTAGCGCTAGGTTGACGCCGTGGTTGTGGGACCCGATCGACGACCAAAAGGCTGGTGGGGAGGCAACTTTGCAAGGGAGGCTCGCACGGTGATTGCACAGGGCGACGCTGCAACCAAAGTGC
GGGTAGCGCTAGGTTGACGCCGTGGTTGTGGGACCCGATCGACGACCCATTCTGTTGCTCATTAATTTCTCCCAGCCTTGTGGGGGAGGCTCGCACGGTGATTGCACAGGGCGACGCTGCAACCAAAGTGC
GGGTAGCGCTAGGTTGACGCCGTGGTTGTGGGACCCGATCGACGACCAAAGTTAATCATCACTACCTCTCCACCTGGCTCTCCAGGAGGCTCGCACGGTGATTGCACAGGGCGACGCTGCAACCAAAGTGC
GGGTAGCGCTAGGTTGACGCCGTGGTTGTGGGACCCGATCGACGACCCCCCACCCTTCATTCATCTCTCAACACCTCCCGGAGGCTCGCACGGTGATTGCACAGGGCGACGCTGCAACCAAAGTGC
GGGTAGCGCTAGGTTGACGCCGTGGTTGTGGGACCCGATCGACGACCAGAGAGCTCCGGACATCTCTGGCATAATGTTCTGGGAGGCTCGCACGGTGATTGCACAGGGCGACGCTGCAACCAAAGTGC
GGGTAGCGCTAGGTTGACGCCGTGGTTGTGGGACCCGATCGACGACCAAGGCTGGAAATTAGACAAAGATGTGAGATCAGGCCAGGAGGCTCGCACGGTGATTGCACAGGGCGACGCTGCAACCAAAGTGC
GGGTAGCGCTAGGTTGACGCCGTGGTTGTGGGACCCGATCGACGACCAAAATGAAGCAGTTTGTACCTCGGCCAGGAAGACGGAGGCTCGCACGGTGATTGCACAGGGCGACGCTGCAACCAAAGTGC
GGGTAGCGCTAGGTTGACGCCGTGGTTGTGGGACCCGATCGACGACCTTCCTTCAGTAGTTGAAAGTGGTAAGCTGATGAGCCAGGAGGCTCGCACGGTGATTGCACAGGGCGACGCTGCAACCAAAGTGC
GGGTAGCGCTAGGTTGACGCCGTGGTTGTGGGACCCGATCGACGACCAGCAAATGGTCTGGGAGACACTTAAAGAAGTGAGTGTGGAGGCTCGCACGGTGATTGCACAGGGCGACGCTGCAACCAAAGTGC
GGGTAGCGCTAGGTTGACGCCGTGGTTGTGGGACCCGATCGACGACCGAGGACAGCACTAGAACTCTTACGGCTCCCCGGAGGCTCGCACGGTGATTGCACAGGGCGACGCTGCAACCAAAGTGC
GGGTAGCGCTAGGTTGACGCCGTGGTTGTGGGACCCGATCGACGACCGTCCAAACTCTATATCAAGGCATGATCCAGCTCCTGCGGAGGCTCGCACGGTGATTGCACAGGGCGACGCTGCAACCAAAGTGC
GGGTAGCGCTAGGTTGACGCCGTGGTTGTGGGACCCGATCGACGACCTCTTCTCCTGGAGAACTCCTGCTTTTCAAAATTGGGAGGAGGCTCGCACGGTGATTGCACAGGGCGACGCTGCAACCAAAGTGC
GGGTAGCGCTAGGTTGACGCCGTGGTTGTGGGACCCGATCGACGACCTGCTCAAACATCCCAATGTCTCTCCTCCCTAAGGGGAGGCTCGCACGGTGATTGCACAGGGCGACGCTGCAACCAAAGTGC
GGGTAGCGCTAGGTTGACGCCGTGGTTGTGGGACCCGATCGACGACCTCTCCGTCTGACTGGATTAGGTGCTGCTGGGGAGGCTCGCACGGTGATTGCACAGGGCGACGCTGCAACCAAAGTGC
GGGTAGCGCTAGGTTGACGCCGTGGTTGTGGGACCCGATCGACGACCTCTGCACCTCTAAGCACCCTTCCTGTGATTTCCGGAGGCTCGCACGGTGATTGCACAGGGCGACGCTGCAACCAAAGTGC
GGGTAGCGCTAGGTTGACGCCGTGGTTGTGGGACCCGATCGACGACCCCATCATCATGTTGGTGAGACAGCACGGTAGCGGAGGCTCGCACGGTGATTGCACAGGGCGACGCTGCAACCAAAGTGC
GGGTAGCGCTAGGTTGACGCCGTGGTTGTGGGACCCGATCGACGACCTACCCTAACTCTCTCAGCTCCATTTGGAGTAGTCTCCGGAGGCTCGCACGGTGATTGCACAGGGCGACGCTGCAACCAAAGTGC
GGGTAGCGCTAGGTTGACGCCGTGGTTGTGGGACCCGATCGACGACCTCCATACTATTCCCACATGCTCATCTCTCTGAGCTCAGGAGGCTCGCACGGTGATTGCACAGGGCGACGCTGCAACCAAAGTGC
GGGTAGCGCTAGGTTGACGCCGTGGTTGTGGGACCCGATCGACGACCCTCCTGCTTGGATCCAACCATTTTCATAAAGCTTCCCGGAGGCTCGCACGGTGATTGCACAGGGCGACGCTGCAACCAAAGTGC
GGGTAGCGCTAGGTTGACGCCGTGGTTGTGGGACCCGATCGACGACCTGACTCTCCCTGCCAGAACTGCTACCTCCCGGAGGCTCGCACGGTGATTGCACAGGGCGACGCTGCAACCAAAGTGC
GGGTAGCGCTAGGTTGACGCCGTGGTTGTGGGACCCGATCGACGACCTCTTCTGAAGGCCTGATATTGACATGTCCTTTGGCAGGAGGCTCGCACGGTGATTGCACAGGGCGACGCTGCAACCAAAGTGC
GGGTAGCGCTAGGTTGACGCCGTGGTTGTGGGACCCGATCGACGACCACCAGGGACTCAGACAACATTAAGACTGTTCTCCTCAGGAGGCTCGCACGGTGATTGCACAGGGCGACGCTGCAACCAAAGTGC
GGGTAGCGCTAGGTTGACGCCGTGGTTGTGGGACCCGATCGACGACCCCTTGGATCCATCTCAAGTTCTGTCACTATGGTGTGGGGAGGCTCGCACGGTGATTGCACAGGGCGACGCTGCAACCAAAGTGC
GGGTAGCGCTAGGTTGACGCCGTGGTTGTGGGACCCGATCGACGACCCTCTCTCCACACAGCAGGAAAAGTTTCTCTGACTGCGGAGGCTCGCACGGTGATTGCACAGGGCGACGCTGCAACCAAAGTGC
GGGTAGCGCTAGGTTGACGCCGTGGTTGTGGGACCCGATCGACGACCTTCAGGACACAGGCTCATTAGTTAATTCCCACACTGTGGAGGCTCGCACGGTGATTGCACAGGGCGACGCTGCAACCAAAGTGC
GGGTAGCGCTAGGTTGACGCCGTGGTTGTGGGACCCGATCGACGACCTGGCAACTATTATAGTACATGTGACTGGGCAAACGCAGGAGGCTCGCACGGTGATTGCACAGGGCGACGCTGCAACCAAAGTGC
GGGTAGCGCTAGGTTGACGCCGTGGTTGTGGGACCCGATCGACGACCAAAATGGAGGGTGAGTGAACACATCTGAGCGCGGAGGCTCGCACGGTGATTGCACAGGGCGACGCTGCAACCAAAGTGC
GGGTAGCGCTAGGTTGACGCCGTGGTTGTGGGACCCGATCGACGACCTACTCAACAGATTTCAAGCATTCTGCCCTCACACTGAGGAGGCTCGCACGGTGATTGCACAGGGCGACGCTGCAACCAAAGTGC
GGGTAGCGCTAGGTTGACGCCGTGGTTGTGGGACCCGATCGACGACCGAGTGAGGCCCACCTCCCTCTCACTCCTCAGTGCGATGCGTTTGCGAGTGTGTCTGCCGACGCTGCAACCAAAGTGC
GGGTAGCGCTAGGTTGACGCCGTGGTTGTGGGACCCGATCGACGACCTTTCTCTGTGACCAACTTCACACAATCACTAGCACCTGTGCGATGCGTTTGCGAGTGTGTCTGCCGACGCTGCAACCAAAGTGC
GGGTAGCGCTAGGTTGACGCCGTGGTTGTGGGACCCGATCGACGACCTCAGAGTGACTTGTTTGCATCTTTTCCTGAAGGACCAGTGCGATGCGTTTGCGAGTGTGTCTGCCGACGCTGCAACCAAAGTGC
GGGTAGCGCTAGGTTGACGCCGTGGTTGTGGGACCCGATCGACGACCTGTTTCTGCCTCAAGCTGAACACAAAATTTGTAGGGGGTGCGATGCGTTTGCGAGTGTGTCTGCCGACGCTGCAACCAAAGTGC
GGGTAGCGCTAGGTTGACGCCGTGGTTGTGGGACCCGATCGACGACCGCCACTTAAGGAGCGAAAACTGAGATATGTGTGGACTGTGCGATGCGTTTGCGAGTGTGTCTGCCGACGCTGCAACCAAAGTGC
GGGTAGCGCTAGGTTGACGCCGTGGTTGTGGGACCCGATCGACGACCTACCCAAACAGGTCCATTATTCTGTGAAAAGGGCACTGTGCGATGCGTTTGCGAGTGTGTCTGCCGACGCTGCAACCAAAGTGC
GGGTAGCGCTAGGTTGACGCCGTGGTTGTGGGACCCGATCGACGACCAGTGAAAGTTTCTTCTTGTGACAAAGGGACACTGTGCGTGCGATGCGTTTGCGAGTGTGTCTGCCGACGCTGCAACCAAAGTGC
GGGTAGCGCTAGGTTGACGCCGTGGTTGTGGGACCCGATCGACGACCGCCCCTGAGAATTCCTAAACACTACTGTAACCAGAGGGTGCGATGCGTTTGCGAGTGTGTCTGCCGACGCTGCAACCAAAGTGC
GGGTAGCGCTAGGTTGACGCCGTGGTTGTGGGACCCGATCGACGACCCAGTTTAGATACCTCCAGCCTCCGGCATCAAATCAGTGCGATGCGTTTGCGAGTGTGTCTGCCGACGCTGCAACCAAAGTGC
GGGTAGCGCTAGGTTGACGCCGTGGTTGTGGGACCCGATCGACGACCTCTTGGGACCTATTAGAGCAGGACATATGACTGAGGGGTGCGATGCGTTTGCGAGTGTGTCTGCCGACGCTGCAACCAAAGTGC
GGGTAGCGCTAGGTTGACGCCGTGGTTGTGGGACCCGATCGACGACCGATTTTCATTGGAGCAACTCTGTCCTGCTTTACCAGCGTGCGATGCGTTTGCGAGTGTGTCTGCCGACGCTGCAACCAAAGTGC
GGGTAGCGCTAGGTTGACGCCGTGGTTGTGGGACCCGATCGACGACCATGGTGGGAAGGAGCCAAGGGGCAGGTAAAGTGCGATGCGTTTGCGAGTGTGTCTGCCGACGCTGCAACCAAAGTGC
GGGTAGCGCTAGGTTGACGCCGTGGTTGTGGGACCCGATCGACGACCGAGGCTCTGTAGACTCAGTCAGTGATGTCTCTACCGGTGCGATGCGTTTGCGAGTGTGTCTGCCGACGCTGCAACCAAAGTGC
GGGTAGCGCTAGGTTGACGCCGTGGTTGTGGGACCCGATCGACGACCATCCCTTTTCAGCTGCCTCCCTTACCATTTCTTACAGTGCGATGCGTTTGCGAGTGTGTCTGCCGACGCTGCAACCAAAGTGC
GGGTAGCGCTAGGTTGACGCCGTGGTTGTGGGACCCGATCGACGACCTAACTTTCACTTCTTGTTCTCCAAGGTCTCCAGTGCCGTGCGATGCGTTTGCGAGTGTGTCTGCCGACGCTGCAACCAAAGTGC
GGGTAGCGCTAGGTTGACGCCGTGGTTGTGGGACCCGATCGACGACCCTCCCTGACACTGCTACAGTAGTTATTGGCTTCATGGGTGCGATGCGTTTGCGAGTGTGTCTGCCGACGCTGCAACCAAAGTGC
GGGTAGCGCTAGGTTGACGCCGTGGTTGTGGGACCCGATCGACGACCTGTAATACCTGAAATCCTCCTGTCACGGAGCTACTCTGTGCGATGCGTTTGCGAGTGTGTCTGCCGACGCTGCAACCAAAGTGC
GGGTAGCGCTAGGTTGACGCCGTGGTTGTGGGACCCGATCGACGACCTGTTCTAACTCTATTTCCCTTCCCAGACTGTCCTCCCGTGCGATGCGTTTGCGAGTGTGTCTGCCGACGCTGCAACCAAAGTGC
GGGTAGCGCTAGGTTGACGCCGTGGTTGTGGGACCCGATCGACGACCGTAAAACCAGAAAAGTAAACTGCAGTGCACCTGGACAGTGCGATGCGTTTGCGAGTGTGTCTGCCGACGCTGCAACCAAAGTGC
GGGTAGCGCTAGGTTGACGCCGTGGTTGTGGGACCCGATCGACGACCGGAATGTGCAAACTTGGGGAAGATTCTTCACTGGGGTGCGATGCGTTTGCGAGTGTGTCTGCCGACGCTGCAACCAAAGTGC
GGGTAGCGCTAGGTTGACGCCGTGGTTGTGGGACCCGATCGACGACCGAGACATGCGGGAGATGCCTTCCTTCCCTCGTGCGATGCGTTTGCGAGTGTGTCTGCCGACGCTGCAACCAAAGTGC
GGGTAGCGCTAGGTTGACGCCGTGGTTGTGGGACCCGATCGACGACCCAGGTGGTCCAGGCCAAGTATTCATAACATCAGGGGTGCGATGCGTTTGCGAGTGTGTCTGCCGACGCTGCAACCAAAGTGC
GGGTAGCGCTAGGTTGACGCCGTGGTTGTGGGACCCGATCGACGACCGTCATGAACATTAAGGGGAGCAATTGGAAGCAAGTCCGTGCGATGCGTTTGCGAGTGTGTCTGCCGACGCTGCAACCAAAGTGC
GGGTAGCGCTAGGTTGACGCCGTGGTTGTGGGACCCGATCGACGACCTTCTTACTCTTGAACTCTCAGTTGCTACACTCCCCGTGTGCGATGCGTTTGCGAGTGTGTCTGCCGACGCTGCAACCAAAGTGC
GGGTAGCGCTAGGTTGACGCCGTGGTTGTGGGACCCGATCGACGACCAGCTCTACTAGAGTCCCCTGGTATTTGGACATGTAGGGTGCGATGCGTTTGCGAGTGTGTCTGCCGACGCTGCAACCAAAGTGC
GGGTAGCGCTAGGTTGACGCCGTGGTTGTGGGACCCGATCGACGACCAGACAGGATACTTTGGTTTAAGAAGGAAGCAGTGCCAGTGCGATGCGTTTGCGAGTGTGTCTGCCGACGCTGCAACCAAAGTGC
GGGTAGCGCTAGGTTGACGCCGTGGTTGTGGGACCCGATCGACGACCTATGTCAAGCTCTGTGGTAGTGTTGATGTGTGAAGCTGTGCGATGCGTTTGCGAGTGTGTCTGCCGACGCTGCAACCAAAGTGC
GGGTAGCGCTAGGTTGACGCCGTGGTTGTGGGACCCGATCGACGACCAATTGCCTCTAGGGTGTCCTGATTTCCTATTCTCAGCGTGCGATGCGTTTGCGAGTGTGTCTGCCGACGCTGCAACCAAAGTGC
GGGTAGCGCTAGGTTGACGCCGTGGTTGTGGGACCCGATCGACGACCACAAGGGTTCTATCATACAAATGCACCCTCTTTCCCCGTGCGATGCGTTTGCGAGTGTGTCTGCCGACGCTGCAACCAAAGTGC
GGGTAGCGCTAGGTTGACGCCGTGGTTGTGGGACCCGATCGACGACCTTTTGGCCAGCATTGAGGAACAAAGATGAGCATGGGTGCGATGCGTTTGCGAGTGTGTCTGCCGACGCTGCAACCAAAGTGC
GGGTAGCGCTAGGTTGACGCCGTGGTTGTGGGACCCGATCGACGACCTAGTTGTACCCAAATGTCCAAGAAACCCTCTGTGTCAGTGCGATGCGTTTGCGAGTGTGTCTGCCGACGCTGCAACCAAAGTGC
GGGTAGCGCTAGGTTGACGCCGTGGTTGTGGGACCCGATCGACGACCTAAAAGTCTTAATGGCTCTGAGTCCCATCAGTGCTGCGTGCGATGCGTTTGCGAGTGTGTCTGCCGACGCTGCAACCAAAGTGC
GGGTAGCGCTAGGTTGACGCCGTGGTTGTGGGACCCGATCGACGACCTTCAAGTCCTTCCCCGGTCACTGACTAGTGCGTGCGATGCGTTTGCGAGTGTGTCTGCCGACGCTGCAACCAAAGTGC
GGGTAGCGCTAGGTTGACGCCGTGGTTGTGGGACCCGATCGACGACCTCCAACTCTTACTCCAGGAAGCCGTGGAGGGTGCGATGCGTTTGCGAGTGTGTCTGCCGACGCTGCAACCAAAGTGC
GGGTAGCGCTAGGTTGACGCCGTGGTTGTGGGACCCGATCGACGACCAAGGAGTCTCCCAGTTCTCAGGACCGGTCTGTGCGATGCGTTTGCGAGTGTGTCTGCCGACGCTGCAACCAAAGTGC
GGGTAGCGCTAGGTTGACGCCGTGGTTGTGGGACCCGATCGACGACCAAACTTGTTCTCTCTCCAGCTCCTGTCAAGTTTCTCCGTGCGATGCGTTTGCGAGTGTGTCTGCCGACGCTGCAACCAAAGTGC
GGGTAGCGCTAGGTTGACGCCGTGGTTGTGGGACCCGATCGACGACCTGGCTGATTCTCCTGGCTGACTCTGGCTGAGTGCGATGCGTTTGCGAGTGTGTCTGCCGACGCTGCAACCAAAGTGC
GGGTAGCGCTAGGTTGACGCCGTGGTTGTGGGACCCGATCGACGACCATCCTGCCAGGCCAGACAGAGCCATGCTCAGTGCGATGCGTTTGCGAGTGTGTCTGCCGACGCTGCAACCAAAGTGC
GGGTAGCGCTAGGTTGACGCCGTGGTTGTGGGACCCGATCGACGACCGGGAGTGACCATTCTGTGCTCTCAGGAAGCTGTGCGATGCGTTTGCGAGTGTGTCTGCCGACGCTGCAACCAAAGTGC
GGGTAGCGCTAGGTTGACGCCGTGGTTGTGGGACCCGATCGACGACCGCACTATGGCCTGAGGCAGAATGAGGGGAGGTGCGATGCGTTTGCGAGTGTGTCTGCCGACGCTGCAACCAAAGTGC
GGGTAGCGCTAGGTTGACGCCGTGGTTGTGGGACCCGATCGACGACCAACCCATTGCACATCATTTTGAAAATGTGCCTGTCGGTGCGATGCGTTTGCGAGTGTGTCTGCCGACGCTGCAACCAAAGTGC
GGGTAGCGCTAGGTTGACGCCGTGGTTGTGGGACCCGATCGACGACCTTTTCATTAGCACCTCCAAGTGACACTACTTGAGCCCGTGCGATGCGTTTGCGAGTGTGTCTGCCGACGCTGCAACCAAAGTGC
GGGTAGCGCTAGGTTGACGCCGTGGTTGTGGGACCCGATCGACGACCAGGGGCTCAAAGCTAAGGAAGTAGGCAAGAATGAGTGCGATGCGTTTGCGAGTGTGTCTGCCGACGCTGCAACCAAAGTGC
GGGTAGCGCTAGGTTGACGCCGTGGTTGTGGGACCCGATCGACGACCTTATGACTCTCTACTGTTGCTACACAACCCTCAGGGAGTGCGATGCGTTTGCGAGTGTGTCTGCCGACGCTGCAACCAAAGTGC
GGGTAGCGCTAGGTTGACGCCGTGGTTGTGGGACCCGATCGACGACCTTGATACCGTTCCTTAACAACGGAACCCTTCTACACCGTGCGATGCGTTTGCGAGTGTGTCTGCCGACGCTGCAACCAAAGTGC
GGGTAGCGCTAGGTTGACGCCGTGGTTGTGGGACCCGATCGACGACCACAACTTGTGCAGTCATAAATGGCAACCTGTCTCTTCGTGCGATGCGTTTGCGAGTGTGTCTGCCGACGCTGCAACCAAAGTGC
GGGTAGCGCTAGGTTGACGCCGTGGTTGTGGGACCCGATCGACGACCTGCACTTGGCGGAATTTTGTGTGTAATACCTCTCTCCGTGCGATGCGTTTGCGAGTGTGTCTGCCGACGCTGCAACCAAAGTGC
GGGTAGCGCTAGGTTGACGCCGTGGTTGTGGGACCCGATCGACGACCTCTACCACCAAGGAATCCTGCCTTTCACACTGTGTGCGATGCGTTTGCGAGTGTGTCTGCCGACGCTGCAACCAAAGTGC
GGGTAGCGCTAGGTTGACGCCGTGGTTGTGGGACCCGATCGACGACCTTTACTGGAGGGTTTAGGTCACTGTCCATTTGTTGGGGTGCGATGCGTTTGCGAGTGTGTCTGCCGACGCTGCAACCAAAGTGC
GGGTAGCGCTAGGTTGACGCCGTGGTTGTGGGACCCGATCGACGACCAGTCCTCTTTAGGTTTCTACATAGTTGGTCAGGGCCTGTGCGATGCGTTTGCGAGTGTGTCTGCCGACGCTGCAACCAAAGTGC
GGGTAGCGCTAGGTTGACGCCGTGGTTGTGGGACCCGATCGACGACCTTCCTGATTAGAAGCCATGGGAAGAGGCCACCGTGCGATGCGTTTGCGAGTGTGTCTGCCGACGCTGCAACCAAAGTGC
GGGTAGCGCTAGGTTGACGCCGTGGTTGTGGGACCCGATCGACGACCTGTATTCCTGAAACAGTTGGTACTCTCCTCTTCCCCTGTGCGATGCGTTTGCGAGTGTGTCTGCCGACGCTGCAACCAAAGTGC
GGGTAGCGCTAGGTTGACGCCGTGGTTGTGGGACCCGATCGACGACCAAAATGTGGGTCAGGTGGTCTCTATTATTTGGGGTGTGTGCGATGCGTTTGCGAGTGTGTCTGCCGACGCTGCAACCAAAGTGC
GGGTAGCGCTAGGTTGACGCCGTGGTTGTGGGACCCGATCGACGACCTTTTGAAGATGTGTTCACTGCAGTGTGGTGTCAGGGTGCGATGCGTTTGCGAGTGTGTCTGCCGACGCTGCAACCAAAGTGC
GGGTAGCGCTAGGTTGACGCCGACGCTGCAACCAAAGTGC
GGGTAGCGCTAGGTTGACGCCGTGGTTGTGGGACCCGATCGACGACCAACTAAGTTAGAAAGGAATCTCCAGGAGAGGCCAGGGGGTACAGCGGTGGCTCCAAGTTTCCGCCGACGCTGCAACCAAAGTGC
GGGTAGCGCTAGGTTGACGCCGTGGTTGTGGGACCCGATCGACGACCGAGTACCACCAGCCCACCACTACAGAGAATTTCAGGTACAGCGGTGGCTCCAAGTTTCCGCCGACGCTGCAACCAAAGTGC
GGGTAGCGCTAGGTTGACGCCGTGGTTGTGGGACCCGATCGACGACCGCTAAGCTACTCACAGAAAACAATGCTCAACCACAGGGGTACAGCGGTGGCTCCAAGTTTCCGCCGACGCTGCAACCAAAGTGC
GGGTAGCGCTAGGTTGACGCCGTGGTTGTGGGACCCGATCGACGACCAAAGAATGCTAAGTTTCCCCTTCCCATGTTTGCCTCGGTACAGCGGTGGCTCCAAGTTTCCGCCGACGCTGCAACCAAAGTGC
GGGTAGCGCTAGGTTGACGCCGTGGTTGTGGGACCCGATCGACGACCATCGTGATAATAGGAGGATCTCCCTGGGAAGTGAACAGGTACAGCGGTGGCTCCAAGTTTCCGCCGACGCTGCAACCAAAGTGC
GGGTAGCGCTAGGTTGACGCCGTGGTTGTGGGACCCGATCGACGACCATTGGCATCACCAAGTTCTCTCTCACTGGTCTCTTGGTACAGCGGTGGCTCCAAGTTTCCGCCGACGCTGCAACCAAAGTGC
GGGTAGCGCTAGGTTGACGCCGTGGTTGTGGGACCCGATCGACGACCCCCTTAAGGTCATCCTACACAGGCTTGTTTAGGAAGGGGTACAGCGGTGGCTCCAAGTTTCCGCCGACGCTGCAACCAAAGTGC
GGGTAGCGCTAGGTTGACGCCGTGGTTGTGGGACCCGATCGACGACCTGTTTGGATTGGCTGTTGAAGCGTAAACTATCACCAGGGTACAGCGGTGGCTCCAAGTTTCCGCCGACGCTGCAACCAAAGTGC
GGGTAGCGCTAGGTTGACGCCGTGGTTGTGGGACCCGATCGACGACCACAGTTTTAGCACCATTCAACTCCTCCTGCAACCGGTACAGCGGTGGCTCCAAGTTTCCGCCGACGCTGCAACCAAAGTGC
GGGTAGCGCTAGGTTGACGCCGTGGTTGTGGGACCCGATCGACGACCGCATAATGGAGCAGTATGCAAATACTGGAACTCAGGCGGTACAGCGGTGGCTCCAAGTTTCCGCCGACGCTGCAACCAAAGTGC
GGGTAGCGCTAGGTTGACGCCGTGGTTGTGGGACCCGATCGACGACCTCTCTGAACTCCCGTCAATACCACATAGGATACTGCTGGTACAGCGGTGGCTCCAAGTTTCCGCCGACGCTGCAACCAAAGTGC
GGGTAGCGCTAGGTTGACGCCGTGGTTGTGGGACCCGATCGACGACCTAGTCATACAATGCTCTGTTGTTTGGGCCACCAGGGGTACAGCGGTGGCTCCAAGTTTCCGCCGACGCTGCAACCAAAGTGC
GGGTAGCGCTAGGTTGACGCCGTGGTTGTGGGACCCGATCGACGACCACCATGTATCTCCAACATGCCTTTTACAGAACTGGCCGGTACAGCGGTGGCTCCAAGTTTCCGCCGACGCTGCAACCAAAGTGC
GGGTAGCGCTAGGTTGACGCCGTGGTTGTGGGACCCGATCGACGACCAACTGAGTTGGCACTTACAAAGGAACCAGTAGAAGCCGGTACAGCGGTGGCTCCAAGTTTCCGCCGACGCTGCAACCAAAGTGC
GGGTAGCGCTAGGTTGACGCCGTGGTTGTGGGACCCGATCGACGACCTGTGTGGCCAGAGCTTAGTGAGAGAGTAGTATATGCCGGTACAGCGGTGGCTCCAAGTTTCCGCCGACGCTGCAACCAAAGTGC
GGGTAGCGCTAGGTTGACGCCGTGGTTGTGGGACCCGATCGACGACCAGACAATGGGGTGGTATAATGGAGTTTCCTAGGAGGTGGTACAGCGGTGGCTCCAAGTTTCCGCCGACGCTGCAACCAAAGTGC
GGGTAGCGCTAGGTTGACGCCGTGGTTGTGGGACCCGATCGACGACCTGTTGTCTGAAGTATTACTGTTGGAATGCCTGCCAGCGGTACAGCGGTGGCTCCAAGTTTCCGCCGACGCTGCAACCAAAGTGC
GGGTAGCGCTAGGTTGACGCCGTGGTTGTGGGACCCGATCGACGACCACTTTCAGATGGTCTCCATCCTCTAGATTTCGTGTGCGGTACAGCGGTGGCTCCAAGTTTCCGCCGACGCTGCAACCAAAGTGC
GGGTAGCGCTAGGTTGACGCCGTGGTTGTGGGACCCGATCGACGACCTGGTAACTTCCTGTTGCCTATGGGATCAAATACGAGCGGTACAGCGGTGGCTCCAAGTTTCCGCCGACGCTGCAACCAAAGTGC
GGGTAGCGCTAGGTTGACGCCGTGGTTGTGGGACCCGATCGACGACCTTCGCAGGCTGGGATTTAAATGGTTCTGTTTCACCGGTACAGCGGTGGCTCCAAGTTTCCGCCGACGCTGCAACCAAAGTGC
GGGTAGCGCTAGGTTGACGCCGTGGTTGTGGGACCCGATCGACGACCAGCCAACTTCATGTCTTGCTAGGGCTCTACTCCGGTACAGCGGTGGCTCCAAGTTTCCGCCGACGCTGCAACCAAAGTGC
GGGTAGCGCTAGGTTGACGCCGTGGTTGTGGGACCCGATCGACGACCCCCCATGCTGGACTGGAGGTGAAGAGAAGAGGTACAGCGGTGGCTCCAAGTTTCCGCCGACGCTGCAACCAAAGTGC
GGGTAGCGCTAGGTTGACGCCGTGGTTGTGGGACCCGATCGACGACCAACTGAGAAGAGGAGGGCCTAGGGTGTACAGAGGTACAGCGGTGGCTCCAAGTTTCCGCCGACGCTGCAACCAAAGTGC
GGGTAGCGCTAGGTTGACGCCGTGGTTGTGGGACCCGATCGACGACCAGCTAGCTTATGATTGATCCCTGACATGTAAGCAGCCGGTACAGCGGTGGCTCCAAGTTTCCGCCGACGCTGCAACCAAAGTGC
GGGTAGCGCTAGGTTGACGCCGTGGTTGTGGGACCCGATCGACGACCTTAAGCTGACCTTGACATACAAGAGAAGCCAAGAGCAGGTACAGCGGTGGCTCCAAGTTTCCGCCGACGCTGCAACCAAAGTGC
GGGTAGCGCTAGGTTGACGCCGTGGTTGTGGGACCCGATCGACGACCTCCATTTGTCAGAAGAGAAGAGGGTTCACCTGGTAGTGGTACAGCGGTGGCTCCAAGTTTCCGCCGACGCTGCAACCAAAGTGC
GGGTAGCGCTAGGTTGACGCCGTGGTTGTGGGACCCGATCGACGACCCATAGTGCTCAGAGCCAGGTGAGTGTCAAGAATGCGGTACAGCGGTGGCTCCAAGTTTCCGCCGACGCTGCAACCAAAGTGC
GGGTAGCGCTAGGTTGACGCCGTGGTTGTGGGACCCGATCGACGACCTGTTCCAGGGTCTGCCTGGTTTAAAAGTACTCTGAGGTACAGCGGTGGCTCCAAGTTTCCGCCGACGCTGCAACCAAAGTGC
GGGTAGCGCTAGGTTGACGCCGTGGTTGTGGGACCCGATCGACGACCCCAGTGTTGAGGGGCTGAGGATGGCCAGACGGTACAGCGGTGGCTCCAAGTTTCCGCCGACGCTGCAACCAAAGTGC
GGGTAGCGCTAGGTTGACGCCGTGGTTGTGGGACCCGATCGACGACCAGGTTGTCAAGCTTCATTCTAAGCATGAGTGGGTTCAGGTACAGCGGTGGCTCCAAGTTTCCGCCGACGCTGCAACCAAAGTGC
GGGTAGCGCTAGGTTGACGCCGTGGTTGTGGGACCCGATCGACGACCAAAATGGGAATAGCACCACCCTTCAGATCTGACAACTGGTACAGCGGTGGCTCCAAGTTTCCGCCGACGCTGCAACCAAAGTGC
GGGTAGCGCTAGGTTGACGCCGTGGTTGTGGGACCCGATCGACGACCCCAGCAGGGGTAGATAAGAGACGGTAGCTTCTGGGTACAGCGGTGGCTCCAAGTTTCCGCCGACGCTGCAACCAAAGTGC
GGGTAGCGCTAGGTTGACGCCGTGGTTGTGGGACCCGATCGACGACCTCTGTGCCAAAGCTGGTCATTCACTTGCTTAGCGGTACAGCGGTGGCTCCAAGTTTCCGCCGACGCTGCAACCAAAGTGC
GGGTAGCGCTAGGTTGACGCCGTGGTTGTGGGACCCGATCGACGACCTATGATGTGTAAGAGTTGGTCAGACAATGGTCTGCCCGGTACAGCGGTGGCTCCAAGTTTCCGCCGACGCTGCAACCAAAGTGC
GGGTAGCGCTAGGTTGACGCCGTGGTTGTGGGACCCGATCGACGACCTTCCCACCAGAGGTAAACCTGAATCCATAACTAGGGAGGTACAGCGGTGGCTCCAAGTTTCCGCCGACGCTGCAACCAAAGTGC
GGGTAGCGCTAGGTTGACGCCGTGGTTGTGGGACCCGATCGACGACCAGGAGGGCTCACAAGAACTAATGATGGCCCTGGTACAGCGGTGGCTCCAAGTTTCCGCCGACGCTGCAACCAAAGTGC
GGGTAGCGCTAGGTTGACGCCGTGGTTGTGGGACCCGATCGACGACCAGAGATTTATGGTTGGTGGACTGCCAGTCATAGCAGGTACAGCGGTGGCTCCAAGTTTCCGCCGACGCTGCAACCAAAGTGC
GGGTAGCGCTAGGTTGACGCCGTGGTTGTGGGACCCGATCGACGACCGGGCCCTGAGCCACCAGACAGGGAGACAAGGGTACAGCGGTGGCTCCAAGTTTCCGCCGACGCTGCAACCAAAGTGC
GGGTAGCGCTAGGTTGACGCCGTGGTTGTGGGACCCGATCGACGACCCAGACCAGGATCGAGGAAGAAGCTTAAGTCTGCAGGTACAGCGGTGGCTCCAAGTTTCCGCCGACGCTGCAACCAAAGTGC
GGGTAGCGCTAGGTTGACGCCGTGGTTGTGGGACCCGATCGACGACCTTCTGGACCCACTTAAGAGCAAGCTAGGTAAACCCGGTACAGCGGTGGCTCCAAGTTTCCGCCGACGCTGCAACCAAAGTGC
GGGTAGCGCTAGGTTGACGCCGTGGTTGTGGGACCCGATCGACGACCCTGACTCAAAGACTGACAGCATCTATGGCTCACATCAGGTACAGCGGTGGCTCCAAGTTTCCGCCGACGCTGCAACCAAAGTGC
GGGTAGCGCTAGGTTGACGCCGTGGTTGTGGGACCCGATCGACGACCGTTTGTGTTAAGATAAAGGAGCCTGGAGCATGTGTGGGGTACAGCGGTGGCTCCAAGTTTCCGCCGACGCTGCAACCAAAGTGC
GGGTAGCGCTAGGTTGACGCCGTGGTTGTGGGACCCGATCGACGACCAGGGTCAGGAGAATGATCCATGGAGGATCCTGAGGTACAGCGGTGGCTCCAAGTTTCCGCCGACGCTGCAACCAAAGTGC
GGGTAGCGCTAGGTTGACGCCGTGGTTGTGGGACCCGATCGACGACCGGAAGCCAGAAACGGGGCTGAGCACAGATAGGTACAGCGGTGGCTCCAAGTTTCCGCCGACGCTGCAACCAAAGTGC
GGGTAGCGCTAGGTTGACGCCGTGGTTGTGGGACCCGATCGACGACCGGATGATAAGCCCTCAACAGAAGGGAAGAAACCTCAGGTACAGCGGTGGCTCCAAGTTTCCGCCGACGCTGCAACCAAAGTGC
GGGTAGCGCTAGGTTGACGCCGTGGTTGTGGGACCCGATCGACGACCAATGGTCACTAGGACTAGGGATATACAGCAGCTGAGGGGTACAGCGGTGGCTCCAAGTTTCCGCCGACGCTGCAACCAAAGTGC
GGGTAGCGCTAGGTTGACGCCGTGGTTGTGGGACCCGATCGACGACCGAGAATTGCAGCCAGCGTTCTGTTAATACAATGGTGGGGTACAGCGGTGGCTCCAAGTTTCCGCCGACGCTGCAACCAAAGTGC
GGGTAGCGCTAGGTTGACGCCGTGGTTGTGGGACCCGATCGACGACCAGCCTGGACAATGACAATTTCTCCTATTTGTCTGGGAGGTACAGCGGTGGCTCCAAGTTTCCGCCGACGCTGCAACCAAAGTGC
GGGTAGCGCTAGGTTGACGCCGTGGTTGTGGGACCCGATCGACGACCTGCAAAGATGTCAGAAAATGAGTCCAGATCAATGGCCGGTACAGCGGTGGCTCCAAGTTTCCGCCGACGCTGCAACCAAAGTGC
GGGTAGCGCTAGGTTGACGCCGTGGTTGTGGGACCCGATCGACGACCTAACCCTCAACAACTGGGATCAGGGATTTCCCTGGTACAGCGGTGGCTCCAAGTTTCCGCCGACGCTGCAACCAAAGTGC
GGGTAGCGCTAGGTTGACGCCGTGGTTGTGGGACCCGATCGACGACCTATTTCAATGACAGCAACTCAGTGGTGATAGCTGGGGGGTACAGCGGTGGCTCCAAGTTTCCGCCGACGCTGCAACCAAAGTGC
GGGTAGCGCTAGGTTGACGCCGTGGTTGTGGGACCCGATCGACGACCTTTTCCCTCTTGCAACTGAAGGCCAAAGTGCTGGTACAGCGGTGGCTCCAAGTTTCCGCCGACGCTGCAACCAAAGTGC
GGGTAGCGCTAGGTTGACGCCGTGGTTGTGGGACCCGATCGACGACCGTGGTGGGACCCAGCTGAGAAGTTTGCTTCGGTACAGCGGTGGCTCCAAGTTTCCGCCGACGCTGCAACCAAAGTGC
GGGTAGCGCTAGGTTGACGCCGTGGTTGTGGGACCCGATCGACGACCCTGTCAGTGCACAGTTTGCTACAAGCAACTCTTTCTGGTACAGCGGTGGCTCCAAGTTTCCGCCGACGCTGCAACCAAAGTGC
GGGTAGCGCTAGGTTGACGCCGTGGTTGTGGGACCCGATCGACGACCTGACATTTCCAGTAAACTTGTTGTGGGTTCGATGTGCGGTACAGCGGTGGCTCCAAGTTTCCGCCGACGCTGCAACCAAAGTGC
GGGTAGCGCTAGGTTGACGCCGTGGTTGTGGGACCCGATCGACGACCTCAAGGGTTCTCCTTAGAGCTGCTGAAGATATCACCAGGTACAGCGGTGGCTCCAAGTTTCCGCCGACGCTGCAACCAAAGTGC
GGGTAGCGCTAGGTTGACGCCGTGGTTGTGGGACCCGATCGACGACCAACCTGGGAGTTGAAGTTAGCAATATTTCCGTCAGCGGGTACAGCGGTGGCTCCAAGTTTCCGCCGACGCTGCAACCAAAGTGC
GGGTAGCGCTAGGTTGACGCCGTGGTTGTGGGACCCGATCGACGACCAATGATGTTAGCTGCTGAGTTCAGGTCCAAAGAGACAGGTACAGCGGTGGCTCCAAGTTTCCGCCGACGCTGCAACCAAAGTGC
GGGTAGCGCTAGGTTGACGCCGTGGTTGTGGGACCCGATCGACGACCAGGTTTCCCCTGGTCTGGTAACAAATATGCATCTCTGGTACAGCGGTGGCTCCAAGTTTCCGCCGACGCTGCAACCAAAGTGC
GGGTAGCGCTAGGTTGACGCCGTGGTTGTGGGACCCGATCGACGACCTCCTCATTTTAACCAAACCACAGTGGTTCCAAGCAACGGTACAGCGGTGGCTCCAAGTTTCCGCCGACGCTGCAACCAAAGTGC
GGGTAGCGCTAGGTTGACGCCGTGGTTGTGGGACCCGATCGACGACCACTCTGCGGTCCAGTCATCAGTGGAGCTCAGGTACAGCGGTGGCTCCAAGTTTCCGCCGACGCTGCAACCAAAGTGC
GGGTAGCGCTAGGTTGACGCCGTGGTTGTGGGACCCGATCGACGACCGAGGCAAACAGAATTCTGAGCATTCTCCATTTGGTGTGGTACAGCGGTGGCTCCAAGTTTCCGCCGACGCTGCAACCAAAGTGC
GGGTAGCGCTAGGTTGACGCCGTGGTTGTGGGACCCGATCGACGACCTCAAGGAACAAAGATTAAGTCAGAACCACCCACAGGAGGTACAGCGGTGGCTCCAAGTTTCCGCCGACGCTGCAACCAAAGTGC
GGGTAGCGCTAGGTTGACGCCGTGGTTGTGGGACCCGATCGACGACCTCTCTTAAAAGTACAGGCTATACCGGCCTATGCTCCAGGTACAGCGGTGGCTCCAAGTTTCCGCCGACGCTGCAACCAAAGTGC
GGGTAGCGCTAGGTTGACGCCGTGGTTGTGGGACCCGATCGACGACCACACTCCTTCTCTGCCTGTTTCATTGGACTCTTCTGGTACAGCGGTGGCTCCAAGTTTCCGCCGACGCTGCAACCAAAGTGC
GGGTAGCGCTAGGTTGACGCCGTGGTTGTGGGACCCGATCGACGACCAACATCTAAGGAGATTCACAATGGCCTGCCTTCTGCGGTACAGCGGTGGCTCCAAGTTTCCGCCGACGCTGCAACCAAAGTGC
GGGTAGCGCTAGGTTGACGCCGTGGTTGTGGGACCCGATCGACGACCCTAGCTCTCCAGGCTAATGTACCATGACACAGCCGGTACAGCGGTGGCTCCAAGTTTCCGCCGACGCTGCAACCAAAGTGC
GGGTAGCGCTAGGTTGACGCCGTGGTTGTGGGACCCGATCGACGACCTTCACACAGGCTCTTTCACCTTACTACCTACACACACGGTACAGCGGTGGCTCCAAGTTTCCGCCGACGCTGCAACCAAAGTGC
GGGTAGCGCTAGGTTGACGCCGTGGTTGTGGGACCCGATCGACGACCCAAGGCATGTACACAAACCACAGAGAATGCCTATGCGGTACAGCGGTGGCTCCAAGTTTCCGCCGACGCTGCAACCAAAGTGC
GGGTAGCGCTAGGTTGACGCCGTGGTTGTGGGACCCGATCGACGACCCCTCCCTTTCAAGCTCCTTTCATCTACAAAGTTTGGCGGTACAGCGGTGGCTCCAAGTTTCCGCCGACGCTGCAACCAAAGTGC
GGGTAGCGCTAGGTTGACGCCGTGGTTGTGGGACCCGATCGACGACCTGTTGTCATAAATCAGAGGCAGGAGAGGGTAGGGCGGTACAGCGGTGGCTCCAAGTTTCCGCCGACGCTGCAACCAAAGTGC
GGGTAGCGCTAGGTTGACGCCGTGGTTGTGGGACCCGATCGACGACCAGAGATTGGTTTAGGAACCAGTTGGAGGGTAACACGGGTACAGCGGTGGCTCCAAGTTTCCGCCGACGCTGCAACCAAAGTGC
GGGTAGCGCTAGGTTGACGCCGTGGTTGTGGGACCCGATCGACGACCAGCCATCCTCCTGAAGGGCCTGTTGCCGACCTCACGACGGAAGACGCAGCCCAACTCCGACGCTGCAACCAAAGTGC
GGGTAGCGCTAGGTTGACGCCGTGGTTGTGGGACCCGATCGACGACCCCCAAGACACTGCTTCCAGCAGACTCAAGTCCTCACGACGGAAGACGCAGCCCAACTCCGACGCTGCAACCAAAGTGC
GGGTAGCGCTAGGTTGACGCCGTGGTTGTGGGACCCGATCGACGACCTATAGGCTCTCTCTACAGACACAACTGCAACTGTCCTCTCACGACGGAAGACGCAGCCCAACTCCGACGCTGCAACCAAAGTGC
GGGTAGCGCTAGGTTGACGCCGTGGTTGTGGGACCCGATCGACGACCAAGAGTGGCTACAATAAATCCTAAAGTCCTGCAGCCTCTCACGACGGAAGACGCAGCCCAACTCCGACGCTGCAACCAAAGTGC
GGGTAGCGCTAGGTTGACGCCGTGGTTGTGGGACCCGATCGACGACCTTAGAACACATTTAGGTAGCTTACAGCACGCGAAGCACTCACGACGGAAGACGCAGCCCAACTCCGACGCTGCAACCAAAGTGC
GGGTAGCGCTAGGTTGACGCCGTGGTTGTGGGACCCGATCGACGACCAAACCAAATAGCGAAATCACTCTCCCTCTCCGAAAGACTCACGACGGAAGACGCAGCCCAACTCCGACGCTGCAACCAAAGTGC
GGGTAGCGCTAGGTTGACGCCGTGGTTGTGGGACCCGATCGACGACCAAAATACTATTGTCTGCCAGAGTCCACACGGCGCCTCACGACGGAAGACGCAGCCCAACTCCGACGCTGCAACCAAAGTGC
GGGTAGCGCTAGGTTGACGCCGTGGTTGTGGGACCCGATCGACGACCCCCCGGCATAGTGTTCTCAAGAGCTTTCAACACCTCACGACGGAAGACGCAGCCCAACTCCGACGCTGCAACCAAAGTGC
GGGTAGCGCTAGGTTGACGCCGTGGTTGTGGGACCCGATCGACGACCAGAGCCATGCTTCAGACACGCAAAGCTTCTCTCACGACGGAAGACGCAGCCCAACTCCGACGCTGCAACCAAAGTGC
GGGTAGCGCTAGGTTGACGCCGTGGTTGTGGGACCCGATCGACGACCAAGGCTAGTCTACTAAAGAGGTTTTGTCCACCTGCTGCTCACGACGGAAGACGCAGCCCAACTCCGACGCTGCAACCAAAGTGC
GGGTAGCGCTAGGTTGACGCCGTGGTTGTGGGACCCGATCGACGACCAAGGAGGACTATTGGGTGTGAACTCAAAGAATGGGAGCTCACGACGGAAGACGCAGCCCAACTCCGACGCTGCAACCAAAGTGC
GGGTAGCGCTAGGTTGACGCCGTGGTTGTGGGACCCGATCGACGACCAAGTCCTAGGGTCAAGCCAAGAAAAGAGAAAGTTGCACTCACGACGGAAGACGCAGCCCAACTCCGACGCTGCAACCAAAGTGC
GGGTAGCGCTAGGTTGACGCCGTGGTTGTGGGACCCGATCGACGACCTGCCAGGATACAGGCAAGGGATTTAGACTCCCCTCACGACGGAAGACGCAGCCCAACTCCGACGCTGCAACCAAAGTGC
GGGTAGCGCTAGGTTGACGCCGTGGTTGTGGGACCCGATCGACGACCTTTAAACAAAGGAGTGGTATGATCCACCTGTCCTGCTCTCACGACGGAAGACGCAGCCCAACTCCGACGCTGCAACCAAAGTGC
GGGTAGCGCTAGGTTGACGCCGTGGTTGTGGGACCCGATCGACGACCATTCTTAGCACCCAACTGAATCCCCTAGCACGTCTCACGACGGAAGACGCAGCCCAACTCCGACGCTGCAACCAAAGTGC
GGGTAGCGCTAGGTTGACGCCGTGGTTGTGGGACCCGATCGACGACCTCCTACATTTGGAAGCTCTGGCAGATCAAATGCTACTCTCACGACGGAAGACGCAGCCCAACTCCGACGCTGCAACCAAAGTGC
GGGTAGCGCTAGGTTGACGCCGTGGTTGTGGGACCCGATCGACGACCTCTAAGGTGGTAACTTTGAGCTGTTTCAGTAGCACCGCTCACGACGGAAGACGCAGCCCAACTCCGACGCTGCAACCAAAGTGC
GGGTAGCGCTAGGTTGACGCCGTGGTTGTGGGACCCGATCGACGACCAAGCAGCTTACAGCTAGTATTTCCACAGAGTCAGTGCCTCACGACGGAAGACGCAGCCCAACTCCGACGCTGCAACCAAAGTGC
GGGTAGCGCTAGGTTGACGCCGTGGTTGTGGGACCCGATCGACGACCAAACCAAGTCAATTGATGAGAAGCTGCTGTGTCCATCCTCACGACGGAAGACGCAGCCCAACTCCGACGCTGCAACCAAAGTGC
GGGTAGCGCTAGGTTGACGCCGTGGTTGTGGGACCCGATCGACGACCTTTGGTAACTCTGGGCAACTTTTCCTCATCCAGTTGTCTCACGACGGAAGACGCAGCCCAACTCCGACGCTGCAACCAAAGTGC
GGGTAGCGCTAGGTTGACGCCGTGGTTGTGGGACCCGATCGACGACCATGTCTGGACACCAGAGGATCTAGACTGGTGAAAACTCTCACGACGGAAGACGCAGCCCAACTCCGACGCTGCAACCAAAGTGC
GGGTAGCGCTAGGTTGACGCCGTGGTTGTGGGACCCGATCGACGACCCACATTGCATCTGAGGATAGCTAGCCTGCTGCCTCACGACGGAAGACGCAGCCCAACTCCGACGCTGCAACCAAAGTGC
GGGTAGCGCTAGGTTGACGCCGTGGTTGTGGGACCCGATCGACGACCAGACCCTGAACTCCTTACCATGAGATCACAGATAGCCCTCACGACGGAAGACGCAGCCCAACTCCGACGCTGCAACCAAAGTGC
GGGTAGCGCTAGGTTGACGCCGTGGTTGTGGGACCCGATCGACGACCCTCAGGCTTGAGGATGCCCAAATTTAGAAATCACAGGCTCACGACGGAAGACGCAGCCCAACTCCGACGCTGCAACCAAAGTGC
GGGTAGCGCTAGGTTGACGCCGTGGTTGTGGGACCCGATCGACGACCCATGGATGCTGTCAAGCTCAACTTCCTTCATCTTTGCCTCACGACGGAAGACGCAGCCCAACTCCGACGCTGCAACCAAAGTGC
GGGTAGCGCTAGGTTGACGCCGTGGTTGTGGGACCCGATCGACGACCAAGGAAGTGGGAGATCAGGAAGTGTTAAGCACAAAGTCTCACGACGGAAGACGCAGCCCAACTCCGACGCTGCAACCAAAGTGC
GGGTAGCGCTAGGTTGACGCCGTGGTTGTGGGACCCGATCGACGACCTGTGAAACACAGGACTACCCAAGACAAATGTTTCCCTCTCACGACGGAAGACGCAGCCCAACTCCGACGCTGCAACCAAAGTGC
GGGTAGCGCTAGGTTGACGCCGTGGTTGTGGGACCCGATCGACGACCTCTTACTCTGCAGGATCAAAATGTCAAGCAGTGACCACTCACGACGGAAGACGCAGCCCAACTCCGACGCTGCAACCAAAGTGC
GGGTAGCGCTAGGTTGACGCCGTGGTTGTGGGACCCGATCGACGACCAAAATTCTGTACCACAGCCATTCCTTAGAAGCCAGCTCTCACGACGGAAGACGCAGCCCAACTCCGACGCTGCAACCAAAGTGC
GGGTAGCGCTAGGTTGACGCCGTGGTTGTGGGACCCGATCGACGACCCATGGGATCAAACAGACAAGCAAGCTCACTTCTCAAGCTCACGACGGAAGACGCAGCCCAACTCCGACGCTGCAACCAAAGTGC
GGGTAGCGCTAGGTTGACGCCGTGGTTGTGGGACCCGATCGACGACCACGTATTAGTCCATATTGGTGAGTTCCTTTGTGCCCACTCACGACGGAAGACGCAGCCCAACTCCGACGCTGCAACCAAAGTGC
GGGTAGCGCTAGGTTGACGCCGTGGTTGTGGGACCCGATCGACGACCAACTTAGCTGCCGCACACTACAGTGATAGGAAACTCTCACGACGGAAGACGCAGCCCAACTCCGACGCTGCAACCAAAGTGC
GGGTAGCGCTAGGTTGACGCCGTGGTTGTGGGACCCGATCGACGACCTTTTGTCAAACCCACTACAGTGGATCCCACAATGGGCTCACGACGGAAGACGCAGCCCAACTCCGACGCTGCAACCAAAGTGC
GGGTAGCGCTAGGTTGACGCCGTGGTTGTGGGACCCGATCGACGACCCTGAGACCTCGTCTAGAGTCATCAGGTTTTCCAGGACTCACGACGGAAGACGCAGCCCAACTCCGACGCTGCAACCAAAGTGC
GGGTAGCGCTAGGTTGACGCCGTGGTTGTGGGACCCGATCGACGACCTGTGCAGATGGCCTGGAAACTTGGCCAAGACTCACGACGGAAGACGCAGCCCAACTCCGACGCTGCAACCAAAGTGC
GGGTAGCGCTAGGTTGACGCCGTGGTTGTGGGACCCGATCGACGACCGCTGTATATCCACCAAATGCTGTGACACAAGGAATGGCTCACGACGGAAGACGCAGCCCAACTCCGACGCTGCAACCAAAGTGC
GGGTAGCGCTAGGTTGACGCCGTGGTTGTGGGACCCGATCGACGACCGCCTCAAAATGTTTCAGGCCAGCACAGCTTCTCACGACGGAAGACGCAGCCCAACTCCGACGCTGCAACCAAAGTGC
GGGTAGCGCTAGGTTGACGCCGTGGTTGTGGGACCCGATCGACGACCTTTCAGTGGCAGTTAAATATTGTGGCAAAGCCAAGGTCTCACGACGGAAGACGCAGCCCAACTCCGACGCTGCAACCAAAGTGC
GGGTAGCGCTAGGTTGACGCCGTGGTTGTGGGACCCGATCGACGACCAAGACTGAGAGATTGGAGATGGCGTCAGAGAGCCTCACGACGGAAGACGCAGCCCAACTCCGACGCTGCAACCAAAGTGC
GGGTAGCGCTAGGTTGACGCCGTGGTTGTGGGACCCGATCGACGACCTCCTAGCAGGTATGTCAAGGCTCTGATCCAATCTCTCTCACGACGGAAGACGCAGCCCAACTCCGACGCTGCAACCAAAGTGC
GGGTAGCGCTAGGTTGACGCCGTGGTTGTGGGACCCGATCGACGACCGGGCTAGCAGAAGCCTCCAGCAGCTCTCTGCTCACGACGGAAGACGCAGCCCAACTCCGACGCTGCAACCAAAGTGC
GGGTAGCGCTAGGTTGACGCCGTGGTTGTGGGACCCGATCGACGACCAGCACTAAACCAGTACAATGTAGTCTCCCAACCAGGCTCACGACGGAAGACGCAGCCCAACTCCGACGCTGCAACCAAAGTGC
GGGTAGCGCTAGGTTGACGCCGTGGTTGTGGGACCCGATCGACGACCGGATGGAGACTCCAACTCAGATGCTGTAGATCTTTGCCTCACGACGGAAGACGCAGCCCAACTCCGACGCTGCAACCAAAGTGC
GGGTAGCGCTAGGTTGACGCCGTGGTTGTGGGACCCGATCGACGACCTTTGATGGCAAATGCTTTCCCAGTAAGTTGTTTGCCACTCACGACGGAAGACGCAGCCCAACTCCGACGCTGCAACCAAAGTGC
GGGTAGCGCTAGGTTGACGCCGTGGTTGTGGGACCCGATCGACGACCAAAAGACAATTACTGCTGACATGCAAGCTCTCCAGTGCTCACGACGGAAGACGCAGCCCAACTCCGACGCTGCAACCAAAGTGC
GGGTAGCGCTAGGTTGACGCCGTGGTTGTGGGACCCGATCGACGACCCACTTATGCCCAGGCCACTGGGTTACTTCCCTCACGACGGAAGACGCAGCCCAACTCCGACGCTGCAACCAAAGTGC
GGGTAGCGCTAGGTTGACGCCGTGGTTGTGGGACCCGATCGACGACCTCCAACCTTCACTTGAGGATCGTAACTCAGAGAAGGACTCACGACGGAAGACGCAGCCCAACTCCGACGCTGCAACCAAAGTGC
GGGTAGCGCTAGGTTGACGCCGTGGTTGTGGGACCCGATCGACGACCAGCTATGTGACCACCAGAAAGTCAAAGTCCTGACTCTCACGACGGAAGACGCAGCCCAACTCCGACGCTGCAACCAAAGTGC
GGGTAGCGCTAGGTTGACGCCGTGGTTGTGGGACCCGATCGACGACCTGCTCCTCCTCCTGACAAAGGTGGCTCTGACTCACGACGGAAGACGCAGCCCAACTCCGACGCTGCAACCAAAGTGC
GGGTAGCGCTAGGTTGACGCCGTGGTTGTGGGACCCGATCGACGACCATGAAGGGCAACCTCTCCATGCCGGCAAATCTCACGACGGAAGACGCAGCCCAACTCCGACGCTGCAACCAAAGTGC
GGGTAGCGCTAGGTTGACGCCGTGGTTGTGGGACCCGATCGACGACCCCGCTCAATGTTCATGCATTCGATGAAGTATGCCACTCACGACGGAAGACGCAGCCCAACTCCGACGCTGCAACCAAAGTGC
GGGTAGCGCTAGGTTGACGCCGTGGTTGTGGGACCCGATCGACGACCTCATTACATCAAACGGGTTGACCTGTTCAGAGTTCCCCTCACGACGGAAGACGCAGCCCAACTCCGACGCTGCAACCAAAGTGC
GGGTAGCGCTAGGTTGACGCCGTGGTTGTGGGACCCGATCGACGACCAAGGGTATAAGATGTTGTCACGTTGAAAACCACCCCACTCACGACGGAAGACGCAGCCCAACTCCGACGCTGCAACCAAAGTGC
GGGTAGCGCTAGGTTGACGCCGTGGTTGTGGGACCCGATCGACGACCACAAGTTGGGTGTGTTAAGGCCTTGTTGTAACAGAGCCTCACGACGGAAGACGCAGCCCAACTCCGACGCTGCAACCAAAGTGC
GGGTAGCGCTAGGTTGACGCCGTGGTTGTGGGACCCGATCGACGACCAAGAACTGTAATAAATTGGGGTGGGTGGGAGGTTTGCCTCACGACGGAAGACGCAGCCCAACTCCGACGCTGCAACCAAAGTGC
GGGTAGCGCTAGGTTGACGCCGTGGTTGTGGGACCCGATCGACGACCCTCAGAAAACAAGCCCTTAATCAGTTCTTGACCAGCCCTCACGACGGAAGACGCAGCCCAACTCCGACGCTGCAACCAAAGTGC
GGGTAGCGCTAGGTTGACGCCGTGGTTGTGGGACCCGATCGACGACCAATATCACATCCGGTCTCAGAATCTGCAACCCTCTGCTCACGACGGAAGACGCAGCCCAACTCCGACGCTGCAACCAAAGTGC
GGGTAGCGCTAGGTTGACGCCGTGGTTGTGGGACCCGATCGACGACCATTAGATGCAAAGTCTCTTTCATTGGTCCCTGGAGCTCTCACGACGGAAGACGCAGCCCAACTCCGACGCTGCAACCAAAGTGC
GGGTAGCGCTAGGTTGACGCCGTGGTTGTGGGACCCGATCGACGACCTTATCAGTGAGTCAGCATCTCTCCTCCTGTTTCTCCCCTCACGACGGAAGACGCAGCCCAACTCCGACGCTGCAACCAAAGTGC
GGGTAGCGCTAGGTTGACGCCGTGGTTGTGGGACCCGATCGACGACCTATTCTCTGAAGCAGAATTCAGCATTTCCACCCACGTCTCACGACGGAAGACGCAGCCCAACTCCGACGCTGCAACCAAAGTGC
GGGTAGCGCTAGGTTGACGCCGTGGTTGTGGGACCCGATCGACGACCAAGTCCTAGGTTCTACATCACTGACCTCTAGGAGCCCTCACGACGGAAGACGCAGCCCAACTCCGACGCTGCAACCAAAGTGC
GGGTAGCGCTAGGTTGACGCCGTGGTTGTGGGACCCGATCGACGACCATCAGAGACCTGAGCCCTATCTCAAGACACTACAGACCTCACGACGGAAGACGCAGCCCAACTCCGACGCTGCAACCAAAGTGC
GGGTAGCGCTAGGTTGACGCCGTGGTTGTGGGACCCGATCGACGACCAGTGATGTGTTACACTGGCAGACATCCCCAATGCCTCACGACGGAAGACGCAGCCCAACTCCGACGCTGCAACCAAAGTGC
GGGTAGCGCTAGGTTGACGCCGTGGTTGTGGGACCCGATCGACGACCAATGGAAGAGGGCTTCAAGCAGGCTCTTCAAAACTCACGACGGAAGACGCAGCCCAACTCCGACGCTGCAACCAAAGTGC
GGGTAGCGCTAGGTTGACGCCGTGGTTGTGGGACCCGATCGACGACCCCTTTTCCAGACTCATAGATGCTGCTGGAAGGTTCACTCACGACGGAAGACGCAGCCCAACTCCGACGCTGCAACCAAAGTGC
GGGTAGCGCTAGGTTGACGCCGTGGTTGTGGGACCCGATCGACGACCGGGGCTACCACCAGGAGGAGCTCCTGAGAGCTCACGACGGAAGACGCAGCCCAACTCCGACGCTGCAACCAAAGTGC
GGGTAGCGCTAGGTTGACGCCGTGGTTGTGGGACCCGATCGACGACCCCTCTGCCACACAAGCTGATGGTAGGAGCCCTCACGACGGAAGACGCAGCCCAACTCCGACGCTGCAACCAAAGTGC
GGGTAGCGCTAGGTTGACGCCGTGGTTGTGGGACCCGATCGACGACCCAGGTGACAAAAGAGACTGAGGGCACCTCCCCTCACGACGGAAGACGCAGCCCAACTCCGACGCTGCAACCAAAGTGC
GGGTAGCGCTAGGTTGACGCCGTGGTTGTGGGACCCGATCGACGACCAAGGACTACTGCAGAGGGTACTGTCAGACCCCCTCACGACGGAAGACGCAGCCCAACTCCGACGCTGCAACCAAAGTGC
GGGTAGCGCTAGGTTGACGCCGTGGTTGTGGGACCCGATCGACGACCGGCTGTGCCTGGCCAGGCTAGTGACCAGAGCTCACGACGGAAGACGCAGCCCAACTCCGACGCTGCAACCAAAGTGC
GGGTAGCGCTAGGTTGACGCCGTGGTTGTGGGACCCGATCGACGACCACACCTTCAGGATGAAGAATGCACAAGGAATGAAGGTCTCACGACGGAAGACGCAGCCCAACTCCGACGCTGCAACCAAAGTGC
GGGTAGCGCTAGGTTGACGCCGTGGTTGTGGGACCCGATCGACGACCTGAGTACCATGTGTGCAAGTCACTTCAGAATGAGACACTCACGACGGAAGACGCAGCCCAACTCCGACGCTGCAACCAAAGTGC
GGGTAGCGCTAGGTTGACGCCGTGGTTGTGGGACCCGATCGACGACCCCCCTTGCAAAGTGGGTGTATCAATGTTTGAGCTCTCACGACGGAAGACGCAGCCCAACTCCGACGCTGCAACCAAAGTGC
GGGTAGCGCTAGGTTGACGCCGTGGTTGTGGGACCCGATCGACGACCTTTGTAGAAGCTGAGGAGTTGGGAGGAAGAGACTTCCCTCACGACGGAAGACGCAGCCCAACTCCGACGCTGCAACCAAAGTGC
GGGTAGCGCTAGGTTGACGCCGTGGTTGTGGGACCCGATCGACGACCAAGGAAGTACAGACTTGCACATCCTGAAGGAAAGACCCTCACGACGGAAGACGCAGCCCAACTCCGACGCTGCAACCAAAGTGC
GGGTAGCGCTAGGTTGACGCCGTGGTTGTGGGACCCGATCGACGACCAACACTCTCTCAGGGTCTGGTGCCACGCAACTCACGACGGAAGACGCAGCCCAACTCCGACGCTGCAACCAAAGTGC
GGGTAGCGCTAGGTTGACGCCGTGGTTGTGGGACCCGATCGACGACCATCCCACTGAAAACTTTGTTTGAGAGGAAGAGCCAGACTCACGACGGAAGACGCAGCCCAACTCCGACGCTGCAACCAAAGTGC
GGGTAGCGCTAGGTTGACGCCGTGGTTGTGGGACCCGATCGACGACCTGCCAGGAAGCGTTAATGTCTGACTTGAGTGTTTTGCTCACGACGGAAGACGCAGCCCAACTCCGACGCTGCAACCAAAGTGC
GGGTAGCGCTAGGTTGACGCCGTGGTTGTGGGACCCGATCGACGACCATGATTTGAGGGAGCTGGAGGTTAAACCTACACCCCTCACGACGGAAGACGCAGCCCAACTCCGACGCTGCAACCAAAGTGC
GGGTAGCGCTAGGTTGACGCCGTGGTTGTGGGACCCGATCGACGACCAATGTTTATACTTCCAGTCTGTCACTGCACACAGGCACTCACGACGGAAGACGCAGCCCAACTCCGACGCTGCAACCAAAGTGC
GGGTAGCGCTAGGTTGACGCCGTGGTTGTGGGACCCGATCGACGACCATTCTAGTACAGAGAATGCAATTGTGGCAGTGGGCGCTCACGACGGAAGACGCAGCCCAACTCCGACGCTGCAACCAAAGTGC
GGGTAGCGCTAGGTTGACGCCGTGGTTGTGGGACCCGATCGACGACCAGTATGGAGAAGTCTATTTCCCATCTCTAGGGCCTGGCTCACGACGGAAGACGCAGCCCAACTCCGACGCTGCAACCAAAGTGC
GGGTAGCGCTAGGTTGACGCCGTGGTTGTGGGACCCGATCGACGACCAAGGCTTGGTTCCTTCTTATAAGTAGGGTGATTGGGGCTCACGACGGAAGACGCAGCCCAACTCCGACGCTGCAACCAAAGTGC
GGGTAGCGCTAGGTTGACGCCGTGGTTGTGGGACCCGATCGACGACCAGGACCAGACTTTGCCTAGGTTGAGGACCACTCACGACGGAAGACGCAGCCCAACTCCGACGCTGCAACCAAAGTGC
GGGTAGCGCTAGGTTGACGCCGTGGTTGTGGGACCCGATCGACGACCTGGGAGCCAATTGATTTTCACAGCTCTAAGAAAAGCCCTCACGACGGAAGACGCAGCCCAACTCCGACGCTGCAACCAAAGTGC
GGGTAGCGCTAGGTTGACGCCGTGGTTGTGGGACCCGATCGACGACCTGTATTACGGGGAATTATGGAAGGGCCTGTGCTCTCACGACGGAAGACGCAGCCCAACTCCGACGCTGCAACCAAAGTGC
GGGTAGCGCTAGGTTGACGCCGTGGTTGTGGGACCCGATCGACGACCACATACAGTTCAGACAAGCTGGAAAACAGGAGGGCCTCACGACGGAAGACGCAGCCCAACTCCGACGCTGCAACCAAAGTGC
GGGTAGCGCTAGGTTGACGCCGTGGTTGTGGGACCCGATCGACGACCTTTCTGAGATCAAGCAGAGGGTATGAGAGTGGTCTCTCTCACGACGGAAGACGCAGCCCAACTCCGACGCTGCAACCAAAGTGC
GGGTAGCGCTAGGTTGACGCCGTGGTTGTGGGACCCGATCGACGACCGGAAGGTGGCAGGGATGATCACAGCAGCCCCTCACGACGGAAGACGCAGCCCAACTCCGACGCTGCAACCAAAGTGC
GGGTAGCGCTAGGTTGACGCCGTGGTTGTGGGACCCGATCGACGACCAGCCCCGAAGGTCATGACAGCGCAGAGGAACTCACGACGGAAGACGCAGCCCAACTCCGACGCTGCAACCAAAGTGC
GGGTAGCGCTAGGTTGACGCCGTGGTTGTGGGACCCGATCGACGACCGACAGAGACCTGGGGAGTGGAGGAGGGAGGCTCACGACGGAAGACGCAGCCCAACTCCGACGCTGCAACCAAAGTGC
GGGTAGCGCTAGGTTGACGCCGTGGTTGTGGGACCCGATCGACGACCAACCTGACACTGAGAGCTCTCAGAATACTGAGAGAGCCTCACGACGGAAGACGCAGCCCAACTCCGACGCTGCAACCAAAGTGC
GGGTAGCGCTAGGTTGACGCCGTGGTTGTGGGACCCGATCGACGACCTTTTAGCATTTGGGCAAGAAAAGGAGGGGAGTACACACTCACGACGGAAGACGCAGCCCAACTCCGACGCTGCAACCAAAGTGC
GGGTAGCGCTAGGTTGACGCCGTGGTTGTGGGACCCGATCGACGACCTGTCTCTATTCTGTAGTCATGCTGATGAGGCCTGAGACTCACGACGGAAGACGCAGCCCAACTCCGACGCTGCAACCAAAGTGC
GGGTAGCGCTAGGTTGACGCCGTGGTTGTGGGACCCGATCGACGACCCATATGGGTCAAAGCCCTCTGTCTCTAACTGCCCCTCACGACGGAAGACGCAGCCCAACTCCGACGCTGCAACCAAAGTGC
GGGTAGCGCTAGGTTGACGCCGTGGTTGTGGGACCCGATCGACGACCCATCCCTCAGATTGCCAAGAGCAATAGGCTTCTGGCTCACGACGGAAGACGCAGCCCAACTCCGACGCTGCAACCAAAGTGC
GGGTAGCGCTAGGTTGACGCCGTGGTTGTGGGACCCGATCGACGACCCCCCTTCTTAACCATGAAGAGTTCTCAATGGCCCCCTCACGACGGAAGACGCAGCCCAACTCCGACGCTGCAACCAAAGTGC
GGGTAGCGCTAGGTTGACGCCGTGGTTGTGGGACCCGATCGACGACCAGGACCCTGACTTAGGCTATGACTTAAGGGATCCCCTCACGACGGAAGACGCAGCCCAACTCCGACGCTGCAACCAAAGTGC
GGGTAGCGCTAGGTTGACGCCGTGGTTGTGGGACCCGATCGACGACCGCCTGCTGGAGAAAGAAGGGTTGTTTGACATATCCCTCACGACGGAAGACGCAGCCCAACTCCGACGCTGCAACCAAAGTGC
GGGTAGCGCTAGGTTGACGCCGTGGTTGTGGGACCCGATCGACGACCAAAAGATCGTCGCACCATCTTCCTACACCTAATCACACTCACGACGGAAGACGCAGCCCAACTCCGACGCTGCAACCAAAGTGC
GGGTAGCGCTAGGTTGACGCCGTGGTTGTGGGACCCGATCGACGACCTATTGCCAAATCCAGATGCTAATGACTAGGGCATCCTCTCACGACGGAAGACGCAGCCCAACTCCGACGCTGCAACCAAAGTGC
GGGTAGCGCTAGGTTGACGCCGTGGTTGTGGGACCCGATCGACGACCACTGTGTTTTGACTTTGTCATTTGCCACTTCCATCCACTCACGACGGAAGACGCAGCCCAACTCCGACGCTGCAACCAAAGTGC
GGGTAGCGCTAGGTTGACGCCGTGGTTGTGGGACCCGATCGACGACCGTGCTTTTCTGGTAGCATGCTGGAAAATGAACCACACTCACGACGGAAGACGCAGCCCAACTCCGACGCTGCAACCAAAGTGC
GGGTAGCGCTAGGTTGACGCCGTGGTTGTGGGACCCGATCGACGACCGCACACTAACACCCACACCCCAGCAGCTCTCTCACGACGGAAGACGCAGCCCAACTCCGACGCTGCAACCAAAGTGC
GGGTAGCGCTAGGTTGACGCCGTGGTTGTGGGACCCGATCGACGACCATCAGTTGTTCTTAAATGAGTCAGCACACACCCAAGCCTCACGACGGAAGACGCAGCCCAACTCCGACGCTGCAACCAAAGTGC
GGGTAGCGCTAGGTTGACGCCGTGGTTGTGGGACCCGATCGACGACCATCTTGGTCACTAGTCGGATGTACACAGGCTGCCTCACGACGGAAGACGCAGCCCAACTCCGACGCTGCAACCAAAGTGC
GGGTAGCGCTAGGTTGACGCCGTGGTTGTGGGACCCGATCGACGACCAGGTTCCCAAACAGACTTCAGCTGCTGCTCCTCACGACGGAAGACGCAGCCCAACTCCGACGCTGCAACCAAAGTGC
GGGTAGCGCTAGGTTGACGCCGTGGTTGTGGGACCCGATCGACGACCTGAGTAAACATTTTCTGGCAGCACACCAAGGGGCTCACGACGGAAGACGCAGCCCAACTCCGACGCTGCAACCAAAGTGC
GGGTAGCGCTAGGTTGACGCCGTGGTTGTGGGACCCGATCGACGACCGCGGGTGGGGACACAGGTAGGCATCTTCTCCTCACGACGGAAGACGCAGCCCAACTCCGACGCTGCAACCAAAGTGC
GGGTAGCGCTAGGTTGACGCCGTGGTTGTGGGACCCGATCGACGACCTGAACTCAAAATGAGCTGATGAGTTCAAGGTCCCTGTCTCACGACGGAAGACGCAGCCCAACTCCGACGCTGCAACCAAAGTGC
GGGTAGCGCTAGGTTGACGCCGTGGTTGTGGGACCCGATCGACGACCAAATAAGCCTACACAGCAAGGGTGTTGCACTAAACAGCTCACGACGGAAGACGCAGCCCAACTCCGACGCTGCAACCAAAGTGC
GGGTAGCGCTAGGTTGACGCCGTGGTTGTGGGACCCGATCGACGACCTTTGCCCAAGCTGCCTGGAGGAAGCATCTTCTCACGACGGAAGACGCAGCCCAACTCCGACGCTGCAACCAAAGTGC
GGGTAGCGCTAGGTTGACGCCGTGGTTGTGGGACCCGATCGACGACCCTGCCCACATTGCGCCTTGGTGTAACCAACCTCACGACGGAAGACGCAGCCCAACTCCGACGCTGCAACCAAAGTGC
GGGTAGCGCTAGGTTGACGCCGTGGTTGTGGGACCCGATCGACGACCATTCAGAGTCCCACAGTTTCATGACCACCAACTTCACTCACGACGGAAGACGCAGCCCAACTCCGACGCTGCAACCAAAGTGC
GGGTAGCGCTAGGTTGACGCCGTGGTTGTGGGACCCGATCGACGACCTGTGAATGAAGATATCTGACGTGAGTGCTGGGAAAGTCTCACGACGGAAGACGCAGCCCAACTCCGACGCTGCAACCAAAGTGC
GGGTAGCGCTAGGTTGACGCCGTGGTTGTGGGACCCGATCGACGACCCATGGCAAAAGGCCTGGGTGGAAAATCAAAATGTCTCACGACGGAAGACGCAGCCCAACTCCGACGCTGCAACCAAAGTGC
GGGTAGCGCTAGGTTGACGCCGTGGTTGTGGGACCCGATCGACGACCATAGCCCATCTACCTCACAGGGATCACAATTTCATGGCTCACGACGGAAGACGCAGCCCAACTCCGACGCTGCAACCAAAGTGC
GGGTAGCGCTAGGTTGACGCCGTGGTTGTGGGACCCGATCGACGACCTTCTTAACCTCTGGTCAGTTGCTTTCCAGTTAGGGTTGATTGGCGCTAGCCCACACCGATTCCGCGACGCTGCAACCAAAGTGC
GGGTAGCGCTAGGTTGACGCCGTGGTTGTGGGACCCGATCGACGACCCCATGCACAAATTATAGTAACAGGAACACCGCCATCCGATTGGCGCTAGCCCACACCGATTCCGCGACGCTGCAACCAAAGTGC
GGGTAGCGCTAGGTTGACGCCGTGGTTGTGGGACCCGATCGACGACCTTATCTAAGAGCAGGAAGAACCCCTGGTTCTTGTCCCGATTGGCGCTAGCCCACACCGATTCCGCGACGCTGCAACCAAAGTGC
GGGTAGCGCTAGGTTGACGCCGTGGTTGTGGGACCCGATCGACGACCGGGGTGTAGAAAGATTATCTGTTAGGCTGCCTGCCGATTGGCGCTAGCCCACACCGATTCCGCGACGCTGCAACCAAAGTGC
GGGTAGCGCTAGGTTGACGCCGTGGTTGTGGGACCCGATCGACGACCAAAATAGTCATGCACGGTTAGTGCAGAGTGAGCAAGGGATTGGCGCTAGCCCACACCGATTCCGCGACGCTGCAACCAAAGTGC
GGGTAGCGCTAGGTTGACGCCGTGGTTGTGGGACCCGATCGACGACCGTACCCTCTCACAGTGGTCATGCTACCAATGACTGATTGGCGCTAGCCCACACCGATTCCGCGACGCTGCAACCAAAGTGC
GGGTAGCGCTAGGTTGACGCCGTGGTTGTGGGACCCGATCGACGACCGATAAGTGGATCATCCATGGAGCTGAGGCCTGAGATTGGCGCTAGCCCACACCGATTCCGCGACGCTGCAACCAAAGTGC
GGGTAGCGCTAGGTTGACGCCGTGGTTGTGGGACCCGATCGACGACCAGCACAGGCACATATGGAAGAATAACAGCTCCAGGGATTGGCGCTAGCCCACACCGATTCCGCGACGCTGCAACCAAAGTGC
GGGTAGCGCTAGGTTGACGCCGTGGTTGTGGGACCCGATCGACGACCATCCACAGAAGTAAAGGCATTGGTGCTTGGAGCGATTGGCGCTAGCCCACACCGATTCCGCGACGCTGCAACCAAAGTGC
GGGTAGCGCTAGGTTGACGCCGTGGTTGTGGGACCCGATCGACGACCATGTAAAGTACATAGCTTGTAAAGCAGCTGGGAGGCTGATTGGCGCTAGCCCACACCGATTCCGCGACGCTGCAACCAAAGTGC
GGGTAGCGCTAGGTTGACGCCGTGGTTGTGGGACCCGATCGACGACCGAGAATGGGAGGACAGGTGTGTGCAGAGTTAAAGTGATTGGCGCTAGCCCACACCGATTCCGCGACGCTGCAACCAAAGTGC
GGGTAGCGCTAGGTTGACGCCGTGGTTGTGGGACCCGATCGACGACCGGCTCCAGTATAGAGCCTAGCTCTCTACAGTGGCGATTGGCGCTAGCCCACACCGATTCCGCGACGCTGCAACCAAAGTGC
GGGTAGCGCTAGGTTGACGCCGTGGTTGTGGGACCCGATCGACGACCTGAGCCAGCACCAAGAGCATGGGCATAGGTGATTGGCGCTAGCCCACACCGATTCCGCGACGCTGCAACCAAAGTGC
GGGTAGCGCTAGGTTGACGCCGTGGTTGTGGGACCCGATCGACGACCAGGAAGAACTTTGCTCCAGGGCCCAAAGTGGATTGGCGCTAGCCCACACCGATTCCGCGACGCTGCAACCAAAGTGC
GGGTAGCGCTAGGTTGACGCCGTGGTTGTGGGACCCGATCGACGACCAATTCACTGTGGTGATGCCTCCAGTATCGGATATGTGGATTGGCGCTAGCCCACACCGATTCCGCGACGCTGCAACCAAAGTGC
GGGTAGCGCTAGGTTGACGCCGTGGTTGTGGGACCCGATCGACGACCGGCAGGCACAAAGCAGTCACAGAGCTTGGGGATTGGCGCTAGCCCACACCGATTCCGCGACGCTGCAACCAAAGTGC
GGGTAGCGCTAGGTTGACGCCGTGGTTGTGGGACCCGATCGACGACCTGTGGAGTGAAGGCAATCTCAGGGGAGCCAGATTGGCGCTAGCCCACACCGATTCCGCGACGCTGCAACCAAAGTGC
GGGTAGCGCTAGGTTGACGCCGTGGTTGTGGGACCCGATCGACGACCGGGGTCAGGGCCCACACAAAGTTGAAAGATGATTGGCGCTAGCCCACACCGATTCCGCGACGCTGCAACCAAAGTGC
GGGTAGCGCTAGGTTGACGCCGTGGTTGTGGGACCCGATCGACGACCGTGGCTGCTCCTTTTCCAAAGCAGCTTCATGGATTGGCGCTAGCCCACACCGATTCCGCGACGCTGCAACCAAAGTGC
GGGTAGCGCTAGGTTGACGCCGTGGTTGTGGGACCCGATCGACGACCGCAACTGCTTCTTGATGGGTGAAGGAGAGGGGATTGGCGCTAGCCCACACCGATTCCGCGACGCTGCAACCAAAGTGC
GGGTAGCGCTAGGTTGACGCCGTGGTTGTGGGACCCGATCGACGACCTATAAAGCCATGTCTCCTTCTCCAGAGCTAACCAGGAGATTGGCGCTAGCCCACACCGATTCCGCGACGCTGCAACCAAAGTGC
GGGTAGCGCTAGGTTGACGCCGTGGTTGTGGGACCCGATCGACGACCGAAATGGCTGTTGGTTGCCTCAGTAGCAAGAGAGATTGGCGCTAGCCCACACCGATTCCGCGACGCTGCAACCAAAGTGC
GGGTAGCGCTAGGTTGACGCCGTGGTTGTGGGACCCGATCGACGACCTATTGGTGTCCTGTGCAGAGCAGGCTGCTGGATTGGCGCTAGCCCACACCGATTCCGCGACGCTGCAACCAAAGTGC
GGGTAGCGCTAGGTTGACGCCGTGGTTGTGGGACCCGATCGACGACCTGACCATGGTGGCTTCTGCAGAGTGGCTGAGATTGGCGCTAGCCCACACCGATTCCGCGACGCTGCAACCAAAGTGC
GGGTAGCGCTAGGTTGACGCCGTGGTTGTGGGACCCGATCGACGACCTTTGTTATTGGCTGTCTTCCAGAGTCACATGTAGGCCGATTGGCGCTAGCCCACACCGATTCCGCGACGCTGCAACCAAAGTGC
GGGTAGCGCTAGGTTGACGCCGTGGTTGTGGGACCCGATCGACGACCTATCACCAGCAATGCTTCCTATGTGGATGGATATGCTGATTGGCGCTAGCCCACACCGATTCCGCGACGCTGCAACCAAAGTGC
GGGTAGCGCTAGGTTGACGCCGTGGTTGTGGGACCCGATCGACGACCACAAGCCTAAATCTGGTTGTGGAATGATAGTGGCACTGATTGGCGCTAGCCCACACCGATTCCGCGACGCTGCAACCAAAGTGC
GGGTAGCGCTAGGTTGACGCCGTGGTTGTGGGACCCGATCGACGACCCCTAATGGTTACCTCTTTGTAGTAAGACTGCCTGGGCGATTGGCGCTAGCCCACACCGATTCCGCGACGCTGCAACCAAAGTGC
GGGTAGCGCTAGGTTGACGCCGTGGTTGTGGGACCCGATCGACGACCCCTAAAATGAATCATCCTAGAGTGTCCACTCCCCTGCGATTGGCGCTAGCCCACACCGATTCCGCGACGCTGCAACCAAAGTGC
GGGTAGCGCTAGGTTGACGCCGTGGTTGTGGGACCCGATCGACGACCTGTGGTACACAAAATGCATGGTACACGAAATGCATGAGATTGGCGCTAGCCCACACCGATTCCGCGACGCTGCAACCAAAGTGC
GGGTAGCGCTAGGTTGACGCCGTGGTTGTGGGACCCGATCGACGACCTGCATTACACACCATGCATCTCATGTAAAATGCTGCCGATTGGCGCTAGCCCACACCGATTCCGCGACGCTGCAACCAAAGTGC
GGGTAGCGCTAGGTTGACGCCGTGGTTGTGGGACCCGATCGACGACCTCTCACATATGCAGACTGATCAGTAATCCCCTGCAACGATTGGCGCTAGCCCACACCGATTCCGCGACGCTGCAACCAAAGTGC
GGGTAGCGCTAGGTTGACGCCGTGGTTGTGGGACCCGATCGACGACCTTACAGGATGCCCAAAAGTCCCTCCAACACTGCGATTGGCGCTAGCCCACACCGATTCCGCGACGCTGCAACCAAAGTGC
GGGTAGCGCTAGGTTGACGCCGTGGTTGTGGGACCCGATCGACGACCAATTAGCCTATCAAATTTCTTCCAGCTGGGTCAGCCAGATTGGCGCTAGCCCACACCGATTCCGCGACGCTGCAACCAAAGTGC
GGGTAGCGCTAGGTTGACGCCGTGGTTGTGGGACCCGATCGACGACCAGAGTCACAGAACAAGTGAAATGTGTGATGGGAGGAGATTGGCGCTAGCCCACACCGATTCCGCGACGCTGCAACCAAAGTGC
GGGTAGCGCTAGGTTGACGCCGTGGTTGTGGGACCCGATCGACGACCATAAGGAGGGTGCATTCTGGGCTCAAGGCTGATTGGCGCTAGCCCACACCGATTCCGCGACGCTGCAACCAAAGTGC
GGGTAGCGCTAGGTTGACGCCGTGGTTGTGGGACCCGATCGACGACCTTTGGACAGAGAAAGCCAGGCCTAAGTGAACCAGATTGGCGCTAGCCCACACCGATTCCGCGACGCTGCAACCAAAGTGC
GGGTAGCGCTAGGTTGACGCCGTGGTTGTGGGACCCGATCGACGACCTCACACTGAGGGGTCCAGGGTAGACAAAGAGGATTGGCGCTAGCCCACACCGATTCCGCGACGCTGCAACCAAAGTGC
GGGTAGCGCTAGGTTGACGCCGTGGTTGTGGGACCCGATCGACGACCATATGAGAAGGGAGAATCACAAGAGGAAGGGAGTGGGGATTGGCGCTAGCCCACACCGATTCCGCGACGCTGCAACCAAAGTGC
GGGTAGCGCTAGGTTGACGCCGTGGTTGTGGGACCCGATCGACGACCTGCAAGACTCTTTCTCACCTAGTTTTGACCTTCCTCCGATTGGCGCTAGCCCACACCGATTCCGCGACGCTGCAACCAAAGTGC
GGGTAGCGCTAGGTTGACGCCGTGGTTGTGGGACCCGATCGACGACCGAGGTTCTCTGTGGCCAGACCTATGAAGCCCGATTGGCGCTAGCCCACACCGATTCCGCGACGCTGCAACCAAAGTGC
GGGTAGCGCTAGGTTGACGCCGTGGTTGTGGGACCCGATCGACGACCAGAATTACGCTGATCACTTTCCTACTGCTGTGGTTGCGATTGGCGCTAGCCCACACCGATTCCGCGACGCTGCAACCAAAGTGC
GGGTAGCGCTAGGTTGACGCCGTGGTTGTGGGACCCGATCGACGACCTGCAACATCTGGCCAGGATGCTTTCTCTCATCGATTGGCGCTAGCCCACACCGATTCCGCGACGCTGCAACCAAAGTGC
GGGTAGCGCTAGGTTGACGCCGTGGTTGTGGGACCCGATCGACGACCACTTCAGGGGCACTTCCAGGAAGCTGTAGGGATTGGCGCTAGCCCACACCGATTCCGCGACGCTGCAACCAAAGTGC
GGGTAGCGCTAGGTTGACGCCGTGGTTGTGGGACCCGATCGACGACCCTTCAGGAGTGAGGGAAAGGTGAGGAGGGTGATTGGCGCTAGCCCACACCGATTCCGCGACGCTGCAACCAAAGTGC
GGGTAGCGCTAGGTTGACGCCGTGGTTGTGGGACCCGATCGACGACCTGTGTGGAGGCCACAGTCCAGCAGAATCAAGATTGGCGCTAGCCCACACCGATTCCGCGACGCTGCAACCAAAGTGC
GGGTAGCGCTAGGTTGACGCCGTGGTTGTGGGACCCGATCGACGACCCCCTGCAGACCCTCCCTGCTACAGCTCCTGGATTGGCGCTAGCCCACACCGATTCCGCGACGCTGCAACCAAAGTGC
GGGTAGCGCTAGGTTGACGCCGTGGTTGTGGGACCCGATCGACGACCTGGTCTAAGGACTTCTCTGCTACACCAGAGAAATCCAGATTGGCGCTAGCCCACACCGATTCCGCGACGCTGCAACCAAAGTGC
GGGTAGCGCTAGGTTGACGCCGTGGTTGTGGGACCCGATCGACGACCCCCCAGCAGGTGTCAGAATCCTCCAGTTCCGATTGGCGCTAGCCCACACCGATTCCGCGACGCTGCAACCAAAGTGC
GGGTAGCGCTAGGTTGACGCCGTGGTTGTGGGACCCGATCGACGACCTGGCTACTGTCTCATTCTCTCAGGGGAGGTGCGATTGGCGCTAGCCCACACCGATTCCGCGACGCTGCAACCAAAGTGC
GGGTAGCGCTAGGTTGACGCCGTGGTTGTGGGACCCGATCGACGACCATTAAGAAGCTACTTTGTTCCCACCATTGGGCTGAGAGATTGGCGCTAGCCCACACCGATTCCGCGACGCTGCAACCAAAGTGC
GGGTAGCGCTAGGTTGACGCCGTGGTTGTGGGACCCGATCGACGACCAACTTAGAATCTCCCTTTCACAGACAGCCTTTGCAGAGATTGGCGCTAGCCCACACCGATTCCGCGACGCTGCAACCAAAGTGC
GGGTAGCGCTAGGTTGACGCCGTGGTTGTGGGACCCGATCGACGACCAAGTCCAACTTATTCCCAGGAATGGCCAAGTCTTTCTGATTGGCGCTAGCCCACACCGATTCCGCGACGCTGCAACCAAAGTGC
GGGTAGCGCTAGGTTGACGCCGTGGTTGTGGGACCCGATCGACGACCCAGAGCTGGGATGCAATCTCCCTCACCCAGGATTGGCGCTAGCCCACACCGATTCCGCGACGCTGCAACCAAAGTGC
GGGTAGCGCTAGGTTGACGCCGTGGTTGTGGGACCCGATCGACGACCCACACCCCTGGGCCCTGCCTACAACAGTCCGATTGGCGCTAGCCCACACCGATTCCGCGACGCTGCAACCAAAGTGC
GGGTAGCGCTAGGTTGACGCCGTGGTTGTGGGACCCGATCGACGACCTTTTGAATCTTCTACCAGCCTGCTTTCCTGTCTCCCGATTGGCGCTAGCCCACACCGATTCCGCGACGCTGCAACCAAAGTGC
GGGTAGCGCTAGGTTGACGCCGTGGTTGTGGGACCCGATCGACGACCTGTAGAAATGGCCTCTCATTTCACTTCTGAGAAGCCAGATTGGCGCTAGCCCACACCGATTCCGCGACGCTGCAACCAAAGTGC
GGGTAGCGCTAGGTTGACGCCGTGGTTGTGGGACCCGATCGACGACCAGTCTACCGCTTTCCCACTGACTGTCTCTAATAAGCAGATTGGCGCTAGCCCACACCGATTCCGCGACGCTGCAACCAAAGTGC
GGGTAGCGCTAGGTTGACGCCGTGGTTGTGGGACCCGATCGACGACCTGTCTAGCCCTCCTTGTCAGCATAATTAGGAAACTGCGATTGGCGCTAGCCCACACCGATTCCGCGACGCTGCAACCAAAGTGC
GGGTAGCGCTAGGTTGACGCCGTGGTTGTGGGACCCGATCGACGACCTTCCTCTGGACGTGCCTGAAGTCCCTATGTGATTGGCGCTAGCCCACACCGATTCCGCGACGCTGCAACCAAAGTGC
GGGTAGCGCTAGGTTGACGCCGTGGTTGTGGGACCCGATCGACGACCTGCTAAGAGCAAGACTCTTCATGTTTTGCCATTTGGGGATTGGCGCTAGCCCACACCGATTCCGCGACGCTGCAACCAAAGTGC
GGGTAGCGCTAGGTTGACGCCGTGGTTGTGGGACCCGATCGACGACCACGTAACTGTTTTGGTGAGCAGTGTGCAAATCAGTGATTGGCGCTAGCCCACACCGATTCCGCGACGCTGCAACCAAAGTGC
GGGTAGCGCTAGGTTGACGCCGTGGTTGTGGGACCCGATCGACGACCACATTTTAGGGTAGAAAACCCAGTCTGTGGTTTCCCTGATTGGCGCTAGCCCACACCGATTCCGCGACGCTGCAACCAAAGTGC
GGGTAGCGCTAGGTTGACGCCGTGGTTGTGGGACCCGATCGACGACCGGCACTGCTTGTGGTACCATTGAGACCTTCAGATTGGCGCTAGCCCACACCGATTCCGCGACGCTGCAACCAAAGTGC
GGGTAGCGCTAGGTTGACGCCGTGGTTGTGGGACCCGATCGACGACCAGCCATGCAGCCCCATAGGTATACTGTTCCTGATTGGCGCTAGCCCACACCGATTCCGCGACGCTGCAACCAAAGTGC
GGGTAGCGCTAGGTTGACGCCGTGGTTGTGGGACCCGATCGACGACCATCCCTTCCCAACTATACCCTGAAATCTTCAAACCCCGATTGGCGCTAGCCCACACCGATTCCGCGACGCTGCAACCAAAGTGC
GGGTAGCGCTAGGTTGACGCCGTGGTTGTGGGACCCGATCGACGACCCTTCCCACTTCAAGAGAAATTTTGGGTCACATGTCCCGATTGGCGCTAGCCCACACCGATTCCGCGACGCTGCAACCAAAGTGC
GGGTAGCGCTAGGTTGACGCCGTGGTTGTGGGACCCGATCGACGACCTTTTGTGTCAACCAACCTGAGCTCATGGGCCGATTGGCGCTAGCCCACACCGATTCCGCGACGCTGCAACCAAAGTGC
GGGTAGCGCTAGGTTGACGCCGTGGTTGTGGGACCCGATCGACGACCATGGGCATGAAATAGCAGCAGCTGTAGTAGCAGTGATTGGCGCTAGCCCACACCGATTCCGCGACGCTGCAACCAAAGTGC
GGGTAGCGCTAGGTTGACGCCGTGGTTGTGGGACCCGATCGACGACCACCTGATGCCTTTGGAAAGATGCAAAGTCTCAGATGTGATTGGCGCTAGCCCACACCGATTCCGCGACGCTGCAACCAAAGTGC
GGGTAGCGCTAGGTTGACGCCGTGGTTGTGGGACCCGATCGACGACCGGGGTGCTTGTTCAGTAATTCATGGTGTGTCCTTGATTGGCGCTAGCCCACACCGATTCCGCGACGCTGCAACCAAAGTGC
GGGTAGCGCTAGGTTGACGCCGTGGTTGTGGGACCCGATCGACGACCACTGTCTTCACTGATGTTATTCCTTCAATTGGCCGGTGATTGGCGCTAGCCCACACCGATTCCGCGACGCTGCAACCAAAGTGC
GGGTAGCGCTAGGTTGACGCCGTGGTTGTGGGACCCGATCGACGACCACATTGTCCTGGTGTCTTCTAGACATGGTCACACTTGGATTGGCGCTAGCCCACACCGATTCCGCGACGCTGCAACCAAAGTGC
GGGTAGCGCTAGGTTGACGCCGTGGTTGTGGGACCCGATCGACGACCCAGACTAATACAGCTATGAGGTCTGGCCCCTTCAGTGATTGGCGCTAGCCCACACCGATTCCGCGACGCTGCAACCAAAGTGC
GGGTAGCGCTAGGTTGACGCCGTGGTTGTGGGACCCGATCGACGACCAACCCAGTATATTACCCTAGGGAAACTGACAGTGGGGGATTGGCGCTAGCCCACACCGATTCCGCGACGCTGCAACCAAAGTGC
GGGTAGCGCTAGGTTGACGCCGTGGTTGTGGGACCCGATCGACGACCATTTCCTAACTCCTGAGCCAGAGTTTCCAACATGTCAGATTGGCGCTAGCCCACACCGATTCCGCGACGCTGCAACCAAAGTGC
GGGTAGCGCTAGGTTGACGCCGTGGTTGTGGGACCCGATCGACGACCAAATAGCTAAGCCCCAATTACCCAGAATTCCTGGTGCGATTGGCGCTAGCCCACACCGATTCCGCGACGCTGCAACCAAAGTGC
GGGTAGCGCTAGGTTGACGCCGTGGTTGTGGGACCCGATCGACGACCTACCCCAGAGTTTTCAGTGCCTTCTACATAGTACCCTGATTGGCGCTAGCCCACACCGATTCCGCGACGCTGCAACCAAAGTGC
GGGTAGCGCTAGGTTGACGCCGTGGTTGTGGGACCCGATCGACGACCATGCCATTGATTAGAAACCAGAGAAAAGCAAGGCTGCGATTGGCGCTAGCCCACACCGATTCCGCGACGCTGCAACCAAAGTGC
GGGTAGCGCTAGGTTGACGCCGTGGTTGTGGGACCCGATCGACGACCAAAATTATGGCTTCATGCATGCACAGGTGTGGAAGTGATTGGCGCTAGCCCACACCGATTCCGCGACGCTGCAACCAAAGTGC
GGGTAGCGCTAGGTTGACGCCGTGGTTGTGGGACCCGATCGACGACCTTCTATTAGTCCAATGGTCATAGGGCTGAGTGGGTGAGATTGGCGCTAGCCCACACCGATTCCGCGACGCTGCAACCAAAGTGC
GGGTAGCGCTAGGTTGACGCCGTGGTTGTGGGACCCGATCGACGACCTAATGGAGGTTAATGGGGAGCCTTCATCTTCCCTACCGATTGGCGCTAGCCCACACCGATTCCGCGACGCTGCAACCAAAGTGC
GGGTAGCGCTAGGTTGACGCCGTGGTTGTGGGACCCGATCGACGACCTTCTAGATTGTTCACATCTCCATGGGGCATATGCAGGGATTGGCGCTAGCCCACACCGATTCCGCGACGCTGCAACCAAAGTGC
GGGTAGCGCTAGGTTGACGCCGTGGTTGTGGGACCCGATCGACGACCAAAATCATGTTGGACACCAGAAAGCTCTTAGCAAGGCGATTGGCGCTAGCCCACACCGATTCCGCGACGCTGCAACCAAAGTGC
GGGTAGCGCTAGGTTGACGCCGTGGTTGTGGGACCCGATCGACGACCAAAACATTTCCTGGGTTATTGGAAGCAGCATGGTGTGATTGGCGCTAGCCCACACCGATTCCGCGACGCTGCAACCAAAGTGC
GGGTAGCGCTAGGTTGACGCCGTGGTTGTGGGACCCGATCGACGACCTGTGGTCAAGTACCAGTGCTGTAAAATCACATGAGGTGATTGGCGCTAGCCCACACCGATTCCGCGACGCTGCAACCAAAGTGC
GGGTAGCGCTAGGTTGACGCCGTGGTTGTGGGACCCGATCGACGACCTACTCCCATTGAATTGATTGGTCCTGTTCTTGCTCCTGATTGGCGCTAGCCCACACCGATTCCGCGACGCTGCAACCAAAGTGC
GGGTAGCGCTAGGTTGACGCCGTGGTTGTGGGACCCGATCGACGACCCCCATGGGGTACATGCCTGGTTGTGTACCCGATTGGCGCTAGCCCACACCGATTCCGCGACGCTGCAACCAAAGTGC
GGGTAGCGCTAGGTTGACGCCGTGGTTGTGGGACCCGATCGACGACCAGTTTGCTTTCCCTTCAGTCAGCGTACTACACTTTCCGATTGGCGCTAGCCCACACCGATTCCGCGACGCTGCAACCAAAGTGC
GGGTAGCGCTAGGTTGACGCCGTGGTTGTGGGACCCGATCGACGACCAAGTAGAACCACCCACACAACCATGAAACACTACAGTGATTGGCGCTAGCCCACACCGATTCCGCGACGCTGCAACCAAAGTGC
GGGTAGCGCTAGGTTGACGCCGTGGTTGTGGGACCCGATCGACGACCAGTTTGCTGGGTCTCTATTAGTTCACCAATGGATGCTGATTGGCGCTAGCCCACACCGATTCCGCGACGCTGCAACCAAAGTGC
GGGTAGCGCTAGGTTGACGCCGACGCTGCAACCAAAGTGC
GGGTAGCGCTAGGTTGACGCCGTGGTTGTGGGACCCGATCGACGACCAGACCCAGAAGTAATGCATTAACATGCTGAGGTGTCACCGTTGCGGAGACCACGAACTGGCTCGCGACGCTGCAACCAAAGTGC
GGGTAGCGCTAGGTTGACGCCGTGGTTGTGGGACCCGATCGACGACCTAGTGCTTCTTAGAGAGCAGCTAGATCACCTTCCTCCCCGTTGCGGAGACCACGAACTGGCTCGCGACGCTGCAACCAAAGTGC
GGGTAGCGCTAGGTTGACGCCGTGGTTGTGGGACCCGATCGACGACCAATCCTTGGTGAATCTGAACATCTGCTAGTGGGTGTCCGTTGCGGAGACCACGAACTGGCTCGCGACGCTGCAACCAAAGTGC
GGGTAGCGCTAGGTTGACGCCGTGGTTGTGGGACCCGATCGACGACCCCCCAAGCAGGATGCAATGACAGGAGACAGCCGTTGCGGAGACCACGAACTGGCTCGCGACGCTGCAACCAAAGTGC
GGGTAGCGCTAGGTTGACGCCGTGGTTGTGGGACCCGATCGACGACCTCCCAGAATCTTCTGGTGAAAATGGAAGCACATGTCCCCGTTGCGGAGACCACGAACTGGCTCGCGACGCTGCAACCAAAGTGC
GGGTAGCGCTAGGTTGACGCCGTGGTTGTGGGACCCGATCGACGACCTTGTGTCAGTCTAGGTGACACATGGTTACTTTGCTCACCGTTGCGGAGACCACGAACTGGCTCGCGACGCTGCAACCAAAGTGC
GGGTAGCGCTAGGTTGACGCCGTGGTTGTGGGACCCGATCGACGACCAGTAGAAGCTGGCTAACCTCCAGATAGCGACTCCCCGTTGCGGAGACCACGAACTGGCTCGCGACGCTGCAACCAAAGTGC
GGGTAGCGCTAGGTTGACGCCGTGGTTGTGGGACCCGATCGACGACCTGGGACATATGATTCTCTCTGTTCCAGCTTTGTGACCCCGTTGCGGAGACCACGAACTGGCTCGCGACGCTGCAACCAAAGTGC
GGGTAGCGCTAGGTTGACGCCGTGGTTGTGGGACCCGATCGACGACCTCACCTTATTTCCAGTTTCCCCTAGTATTTTCGGCCACCGTTGCGGAGACCACGAACTGGCTCGCGACGCTGCAACCAAAGTGC
GGGTAGCGCTAGGTTGACGCCGTGGTTGTGGGACCCGATCGACGACCAATCTGAGGGTTAGGGTAGAACTTGCTCCTCTAGCTCCGTTGCGGAGACCACGAACTGGCTCGCGACGCTGCAACCAAAGTGC
GGGTAGCGCTAGGTTGACGCCGTGGTTGTGGGACCCGATCGACGACCATCAGTTCTCCTTGACAACTAGCACAGAATGGCCTCCGTTGCGGAGACCACGAACTGGCTCGCGACGCTGCAACCAAAGTGC
GGGTAGCGCTAGGTTGACGCCGTGGTTGTGGGACCCGATCGACGACCATGGGAGGGATGGTCCAAGATCAAACAAATACAGAGGCCGTTGCGGAGACCACGAACTGGCTCGCGACGCTGCAACCAAAGTGC
GGGTAGCGCTAGGTTGACGCCGTGGTTGTGGGACCCGATCGACGACCTTCATGAATCTGGCACCCAGAATATTACAAGGCTCCTCCGTTGCGGAGACCACGAACTGGCTCGCGACGCTGCAACCAAAGTGC
GGGTAGCGCTAGGTTGACGCCGTGGTTGTGGGACCCGATCGACGACCTCACATAGATGGTGAGAGTGACAGTGTCAGATCTCCACCGTTGCGGAGACCACGAACTGGCTCGCGACGCTGCAACCAAAGTGC
GGGTAGCGCTAGGTTGACGCCGTGGTTGTGGGACCCGATCGACGACCAGCATATCATCAGGCCCCTATATGTCATTTTCCCAGCCCGTTGCGGAGACCACGAACTGGCTCGCGACGCTGCAACCAAAGTGC
GGGTAGCGCTAGGTTGACGCCGTGGTTGTGGGACCCGATCGACGACCTCTCTGTGGTTGTAGTCTCAGCCTGCTCAAACCCCGTTGCGGAGACCACGAACTGGCTCGCGACGCTGCAACCAAAGTGC
GGGTAGCGCTAGGTTGACGCCGTGGTTGTGGGACCCGATCGACGACCTTACCCCAGGTCTTGAGCAAATACTGATGATATGGGCCCGTTGCGGAGACCACGAACTGGCTCGCGACGCTGCAACCAAAGTGC
GGGTAGCGCTAGGTTGACGCCGTGGTTGTGGGACCCGATCGACGACCAGGGCCCATAGCAGTCACATCAGTTTACATCCACCGTTGCGGAGACCACGAACTGGCTCGCGACGCTGCAACCAAAGTGC
GGGTAGCGCTAGGTTGACGCCGTGGTTGTGGGACCCGATCGACGACCCAGCAGTTTAGCAAGGACCTGATGCAACAGAGAAGCCGTTGCGGAGACCACGAACTGGCTCGCGACGCTGCAACCAAAGTGC
GGGTAGCGCTAGGTTGACGCCGTGGTTGTGGGACCCGATCGACGACCAGTCTGATGCTGTTTGGACCTCTCGAGCCCCCGTTGCGGAGACCACGAACTGGCTCGCGACGCTGCAACCAAAGTGC
GGGTAGCGCTAGGTTGACGCCGTGGTTGTGGGACCCGATCGACGACCTTCAGTGCATTTGATCAGGTATGCTGGTCAGTACTCACCGTTGCGGAGACCACGAACTGGCTCGCGACGCTGCAACCAAAGTGC
GGGTAGCGCTAGGTTGACGCCGTGGTTGTGGGACCCGATCGACGACCGATCCTCATCGCCCTTGTGTCAGTGCTTGCCCGTTGCGGAGACCACGAACTGGCTCGCGACGCTGCAACCAAAGTGC
GGGTAGCGCTAGGTTGACGCCGTGGTTGTGGGACCCGATCGACGACCTCAAAAGGACTAGATGCCACCATGGGGACCCCCGTTGCGGAGACCACGAACTGGCTCGCGACGCTGCAACCAAAGTGC
GGGTAGCGCTAGGTTGACGCCGTGGTTGTGGGACCCGATCGACGACCCGCTCACCAGTGGTGGCCTCGTCTTTTATAGACCGTTGCGGAGACCACGAACTGGCTCGCGACGCTGCAACCAAAGTGC
GGGTAGCGCTAGGTTGACGCCGTGGTTGTGGGACCCGATCGACGACCTGGATTCCTCAAAATCACACTTGCCGCCCTCCGTTGCGGAGACCACGAACTGGCTCGCGACGCTGCAACCAAAGTGC
GGGTAGCGCTAGGTTGACGCCGTGGTTGTGGGACCCGATCGACGACCTGTCTCCAAGATTTGGATCACGGTCTAGATGCTCCCCGTTGCGGAGACCACGAACTGGCTCGCGACGCTGCAACCAAAGTGC
GGGTAGCGCTAGGTTGACGCCGTGGTTGTGGGACCCGATCGACGACCCACCCTTTCTCCTCAAAACTGCCACACCACACCGTTGCGGAGACCACGAACTGGCTCGCGACGCTGCAACCAAAGTGC
GGGTAGCGCTAGGTTGACGCCGTGGTTGTGGGACCCGATCGACGACCCGCCAGGGTGCTCTGCCCTTTCGTGACCAAATCCGTTGCGGAGACCACGAACTGGCTCGCGACGCTGCAACCAAAGTGC
GGGTAGCGCTAGGTTGACGCCGTGGTTGTGGGACCCGATCGACGACCCCCTGAAGCTAGGTGAGTTTTGCAAGCCCTCCGTTGCGGAGACCACGAACTGGCTCGCGACGCTGCAACCAAAGTGC
GGGTAGCGCTAGGTTGACGCCGTGGTTGTGGGACCCGATCGACGACCATGCACGGCAGTCCCACTCCCTGATGATCCCCGTTGCGGAGACCACGAACTGGCTCGCGACGCTGCAACCAAAGTGC
GGGTAGCGCTAGGTTGACGCCGTGGTTGTGGGACCCGATCGACGACCAATTTACATTGGAGCCTAAGTAACAGTGCACCATGCCCCGTTGCGGAGACCACGAACTGGCTCGCGACGCTGCAACCAAAGTGC
GGGTAGCGCTAGGTTGACGCCGTGGTTGTGGGACCCGATCGACGACCACAGAACTTGCCAGAATGACGAAGCTAATGACAGTGACCGTTGCGGAGACCACGAACTGGCTCGCGACGCTGCAACCAAAGTGC
GGGTAGCGCTAGGTTGACGCCGTGGTTGTGGGACCCGATCGACGACCGGGGTGGCCGTAACCAAGATGTCAATGGTTCCGTTGCGGAGACCACGAACTGGCTCGCGACGCTGCAACCAAAGTGC
GGGTAGCGCTAGGTTGACGCCGTGGTTGTGGGACCCGATCGACGACCCTCTGATGTAACTTTACATCGCCACGGGGAAAGATGGCCGTTGCGGAGACCACGAACTGGCTCGCGACGCTGCAACCAAAGTGC
GGGTAGCGCTAGGTTGACGCCGTGGTTGTGGGACCCGATCGACGACCTTTTCCCATGGTGCATTTTGCCAGTCACCAGTCCGTTGCGGAGACCACGAACTGGCTCGCGACGCTGCAACCAAAGTGC
GGGTAGCGCTAGGTTGACGCCGTGGTTGTGGGACCCGATCGACGACCGGAAGGTGACCTCTGAAGGTCACCTTAATTGGAAACGCCGTTGCGGAGACCACGAACTGGCTCGCGACGCTGCAACCAAAGTGC
GGGTAGCGCTAGGTTGACGCCGTGGTTGTGGGACCCGATCGACGACCGCATGTGGAGAGAGAATTCTACTGAAGAAGGTCCTGCCCGTTGCGGAGACCACGAACTGGCTCGCGACGCTGCAACCAAAGTGC
GGGTAGCGCTAGGTTGACGCCGTGGTTGTGGGACCCGATCGACGACCTGGTTGGGGCAGACAACTTCACACTGCTTGCCGTTGCGGAGACCACGAACTGGCTCGCGACGCTGCAACCAAAGTGC
GGGTAGCGCTAGGTTGACGCCGTGGTTGTGGGACCCGATCGACGACCGCAAGCCACTCCTCAGAAAGGATCTTGTTTGAGTAGACCGTTGCGGAGACCACGAACTGGCTCGCGACGCTGCAACCAAAGTGC
GGGTAGCGCTAGGTTGACGCCGTGGTTGTGGGACCCGATCGACGACCAGAAATAATTCATTGTGACCCCTCAGACCATCCTCCGCCGTTGCGGAGACCACGAACTGGCTCGCGACGCTGCAACCAAAGTGC
GGGTAGCGCTAGGTTGACGCCGTGGTTGTGGGACCCGATCGACGACCCAGCATTGAGATTGCTCTGTGTTTGTTGTAGTCACCGCCGTTGCGGAGACCACGAACTGGCTCGCGACGCTGCAACCAAAGTGC
GGGTAGCGCTAGGTTGACGCCGTGGTTGTGGGACCCGATCGACGACCATGAGCAACTAGTGAGCACATGCTGTACTTAACAGCTCCGTTGCGGAGACCACGAACTGGCTCGCGACGCTGCAACCAAAGTGC
GGGTAGCGCTAGGTTGACGCCGTGGTTGTGGGACCCGATCGACGACCTTCACCTTTGATCCTTCATCACCATCTGCCCAAAAGACCGTTGCGGAGACCACGAACTGGCTCGCGACGCTGCAACCAAAGTGC
GGGTAGCGCTAGGTTGACGCCGTGGTTGTGGGACCCGATCGACGACCAGCCCTGTCATGGAGCAGCCAGATTCTCATCCGTTGCGGAGACCACGAACTGGCTCGCGACGCTGCAACCAAAGTGC
GGGTAGCGCTAGGTTGACGCCGTGGTTGTGGGACCCGATCGACGACCAGGTAAACAGAAAAGGATAAGGCACTTCTGGCCTTGTCCGTTGCGGAGACCACGAACTGGCTCGCGACGCTGCAACCAAAGTGC
GGGTAGCGCTAGGTTGACGCCGTGGTTGTGGGACCCGATCGACGACCTTTTAGTAGCAAGGATTTTGTATGGGGAAGCCTGGCTCCGTTGCGGAGACCACGAACTGGCTCGCGACGCTGCAACCAAAGTGC
GGGTAGCGCTAGGTTGACGCCGTGGTTGTGGGACCCGATCGACGACCACTGGAAACTGAACCTTAGGGAATGGATTCCATTCCACCGTTGCGGAGACCACGAACTGGCTCGCGACGCTGCAACCAAAGTGC
GGGTAGCGCTAGGTTGACGCCGTGGTTGTGGGACCCGATCGACGACCAGAGTGAAGAATTGGAAGTTCCTGGGAGGAAATCCTGCCGTTGCGGAGACCACGAACTGGCTCGCGACGCTGCAACCAAAGTGC
GGGTAGCGCTAGGTTGACGCCGTGGTTGTGGGACCCGATCGACGACCTGGTACTGTGTAGAGGAAAGAGAAAACTCTCCCCTCTCCGTTGCGGAGACCACGAACTGGCTCGCGACGCTGCAACCAAAGTGC
GGGTAGCGCTAGGTTGACGCCGTGGTTGTGGGACCCGATCGACGACCCCATGATGGTGCAGCTGAGGCAGAACTTTGGCCGTTGCGGAGACCACGAACTGGCTCGCGACGCTGCAACCAAAGTGC
GGGTAGCGCTAGGTTGACGCCGTGGTTGTGGGACCCGATCGACGACCAACCCTCCGACACCTTCAGAAACTATTCTGAATTGCTCCGTTGCGGAGACCACGAACTGGCTCGCGACGCTGCAACCAAAGTGC
GGGTAGCGCTAGGTTGACGCCGTGGTTGTGGGACCCGATCGACGACCAAAATAGACCTCGCACATCAACCCAGGAGTCAGACCGTTGCGGAGACCACGAACTGGCTCGCGACGCTGCAACCAAAGTGC
GGGTAGCGCTAGGTTGACGCCGTGGTTGTGGGACCCGATCGACGACCGGTCACAAAGGAGACTGACAAATGGGTCATGGTGCCGTTGCGGAGACCACGAACTGGCTCGCGACGCTGCAACCAAAGTGC
GGGTAGCGCTAGGTTGACGCCGTGGTTGTGGGACCCGATCGACGACCTGACCACCCGTGTCCATATAGCTTAACTAGCAGAACTCCGTTGCGGAGACCACGAACTGGCTCGCGACGCTGCAACCAAAGTGC
GGGTAGCGCTAGGTTGACGCCGTGGTTGTGGGACCCGATCGACGACCTGAACAAATCGTTTGCTTAACTGGACAAACGACCTCCCCGTTGCGGAGACCACGAACTGGCTCGCGACGCTGCAACCAAAGTGC
GGGTAGCGCTAGGTTGACGCCGTGGTTGTGGGACCCGATCGACGACCAAATGAGGCGGCATAAAGCTACTTGCATAACTGTGGCCGTTGCGGAGACCACGAACTGGCTCGCGACGCTGCAACCAAAGTGC
GGGTAGCGCTAGGTTGACGCCGTGGTTGTGGGACCCGATCGACGACCTCAGGTGACAAATAACAGGCCACAAGATATCCTGAGCCCGTTGCGGAGACCACGAACTGGCTCGCGACGCTGCAACCAAAGTGC
GGGTAGCGCTAGGTTGACGCCGTGGTTGTGGGACCCGATCGACGACCTCACAGTATTATCCTTCCTGGAATCAGCTGCCAAGTCCCGTTGCGGAGACCACGAACTGGCTCGCGACGCTGCAACCAAAGTGC
GGGTAGCGCTAGGTTGACGCCGTGGTTGTGGGACCCGATCGACGACCAGCTTCCATTCAGACAGTTCATCTTGTTGGCATCAGTCCGTTGCGGAGACCACGAACTGGCTCGCGACGCTGCAACCAAAGTGC
GGGTAGCGCTAGGTTGACGCCGTGGTTGTGGGACCCGATCGACGACCAATGCACAAGTGTAAGTCTCCTAGCGTTCTAGCATCCCCGTTGCGGAGACCACGAACTGGCTCGCGACGCTGCAACCAAAGTGC
GGGTAGCGCTAGGTTGACGCCGTGGTTGTGGGACCCGATCGACGACCCCCATCTGCACTAATATGTCTTCCCCTATGCAGATGCCCGTTGCGGAGACCACGAACTGGCTCGCGACGCTGCAACCAAAGTGC
GGGTAGCGCTAGGTTGACGCCGTGGTTGTGGGACCCGATCGACGACCATTCTTACTTCACTCTAACACTCATGCTGGGCCATCCCCGTTGCGGAGACCACGAACTGGCTCGCGACGCTGCAACCAAAGTGC
GGGTAGCGCTAGGTTGACGCCGTGGTTGTGGGACCCGATCGACGACCCAGGACACAGATGTCCTCCTCACCTTGCCTCCGTTGCGGAGACCACGAACTGGCTCGCGACGCTGCAACCAAAGTGC
GGGTAGCGCTAGGTTGACGCCGTGGTTGTGGGACCCGATCGACGACCGGACTCTGACACCCTACTCCAGGCCATTCTCCGTTGCGGAGACCACGAACTGGCTCGCGACGCTGCAACCAAAGTGC
GGGTAGCGCTAGGTTGACGCCGTGGTTGTGGGACCCGATCGACGACCTCCACATGGGCACCTCCTTGCTAGGCTAAGCCGTTGCGGAGACCACGAACTGGCTCGCGACGCTGCAACCAAAGTGC
GGGTAGCGCTAGGTTGACGCCGTGGTTGTGGGACCCGATCGACGACCGTTCAGAGGACCCATGTCAGGCTGCCGCACCCGTTGCGGAGACCACGAACTGGCTCGCGACGCTGCAACCAAAGTGC
GGGTAGCGCTAGGTTGACGCCGTGGTTGTGGGACCCGATCGACGACCTTCTCCTCATTCTGCTCAGGTTCTGACACCTTCCCCGTTGCGGAGACCACGAACTGGCTCGCGACGCTGCAACCAAAGTGC
GGGTAGCGCTAGGTTGACGCCGTGGTTGTGGGACCCGATCGACGACCACACCAGGTTTCCTCCCTACACACTGTGCCCCGTTGCGGAGACCACGAACTGGCTCGCGACGCTGCAACCAAAGTGC
GGGTAGCGCTAGGTTGACGCCGTGGTTGTGGGACCCGATCGACGACCTGGAATTTGGCTGCCCATAGTGGGCAATTACACCGTTGCGGAGACCACGAACTGGCTCGCGACGCTGCAACCAAAGTGC
GGGTAGCGCTAGGTTGACGCCGTGGTTGTGGGACCCGATCGACGACCAAAATTGCCCCACCAGCAAGCATATGCCAGCCGTTGCGGAGACCACGAACTGGCTCGCGACGCTGCAACCAAAGTGC
GGGTAGCGCTAGGTTGACGCCGTGGTTGTGGGACCCGATCGACGACCTCACTAAGGGTGAAAGCTATACGATAAGGGCTCTCCCCCGTTGCGGAGACCACGAACTGGCTCGCGACGCTGCAACCAAAGTGC
GGGTAGCGCTAGGTTGACGCCGTGGTTGTGGGACCCGATCGACGACCGCAAGCCCAGGCTGCTGTCCCAGCTGCTTATACCGTTGCGGAGACCACGAACTGGCTCGCGACGCTGCAACCAAAGTGC
GGGTAGCGCTAGGTTGACGCCGTGGTTGTGGGACCCGATCGACGACCAGATTTGGGAGATACCTGCCCCTGCTGGCACCGTTGCGGAGACCACGAACTGGCTCGCGACGCTGCAACCAAAGTGC
GGGTAGCGCTAGGTTGACGCCGTGGTTGTGGGACCCGATCGACGACCCCCCAAGGTGTCTTAGTCTAAAGCATGGTCCATCCCCGTTGCGGAGACCACGAACTGGCTCGCGACGCTGCAACCAAAGTGC
GGGTAGCGCTAGGTTGACGCCGTGGTTGTGGGACCCGATCGACGACCCCTACAAGCTCCATCACACTTCTGAAACTAGGTGTGTCCGTTGCGGAGACCACGAACTGGCTCGCGACGCTGCAACCAAAGTGC
GGGTAGCGCTAGGTTGACGCCGTGGTTGTGGGACCCGATCGACGACCATAATTGACAACCACTGCATAGGCCAGTCTCAACTCACCGTTGCGGAGACCACGAACTGGCTCGCGACGCTGCAACCAAAGTGC
GGGTAGCGCTAGGTTGACGCCGTGGTTGTGGGACCCGATCGACGACCTCTCTTAAAGGATCTTCTCCCTGTCTCATTCCCTGCTCCGTTGCGGAGACCACGAACTGGCTCGCGACGCTGCAACCAAAGTGC
GGGTAGCGCTAGGTTGACGCCGTGGTTGTGGGACCCGATCGACGACCATCTCTTCATGTCTCACAGTCTGGCCAAACTGAGATCCCGTTGCGGAGACCACGAACTGGCTCGCGACGCTGCAACCAAAGTGC
GGGTAGCGCTAGGTTGACGCCGTGGTTGTGGGACCCGATCGACGACCAACCTCAGAGAGAGGGAATGTTTTATCCAGCCCTAGACCGTTGCGGAGACCACGAACTGGCTCGCGACGCTGCAACCAAAGTGC
GGGTAGCGCTAGGTTGACGCCGTGGTTGTGGGACCCGATCGACGACCTAGCATCAGATCTCACCCACTGTCACTTAGTTACCCACCGTTGCGGAGACCACGAACTGGCTCGCGACGCTGCAACCAAAGTGC
GGGTAGCGCTAGGTTGACGCCGTGGTTGTGGGACCCGATCGACGACCTGGAGGTTTATGTGAAATTGTTGAGAAGGAAGCCCCACCGTTGCGGAGACCACGAACTGGCTCGCGACGCTGCAACCAAAGTGC
GGGTAGCGCTAGGTTGACGCCGTGGTTGTGGGACCCGATCGACGACCCTGAAATGAAGGAGGAAATAGGAAGGTGGAGAAGGGGCCGTTGCGGAGACCACGAACTGGCTCGCGACGCTGCAACCAAAGTGC
GGGTAGCGCTAGGTTGACGCCGTGGTTGTGGGACCCGATCGACGACCAATTCAAAGAGCTGCTAACTGGAAAAGCGAAAGCCACCGTTGCGGAGACCACGAACTGGCTCGCGACGCTGCAACCAAAGTGC
GGGTAGCGCTAGGTTGACGCCGTGGTTGTGGGACCCGATCGACGACCTTCCACAGCTAAGAAGACTCCCCTCCCTACTAATTCACCGTTGCGGAGACCACGAACTGGCTCGCGACGCTGCAACCAAAGTGC
GGGTAGCGCTAGGTTGACGCCGTGGTTGTGGGACCCGATCGACGACCACAGTCACAGTTGTCAACAATATTTGGAAGCACCAGGCCGTTGCGGAGACCACGAACTGGCTCGCGACGCTGCAACCAAAGTGC
GGGTAGCGCTAGGTTGACGCCGTGGTTGTGGGACCCGATCGACGACCATCTCCTGAGATGCTATGTTTTCATCAGGGTCACCTGCCGTTGCGGAGACCACGAACTGGCTCGCGACGCTGCAACCAAAGTGC
GGGTAGCGCTAGGTTGACGCCGTGGTTGTGGGACCCGATCGACGACCATTCAAGTTCTGTCTGACATGCCATTAAAGCACTGGCCCGTTGCGGAGACCACGAACTGGCTCGCGACGCTGCAACCAAAGTGC
GGGTAGCGCTAGGTTGACGCCGTGGTTGTGGGACCCGATCGACGACCTCAGATTGCAGGCATATTTTCAAACCGGCAGTAACTGCCGTTGCGGAGACCACGAACTGGCTCGCGACGCTGCAACCAAAGTGC
GGGTAGCGCTAGGTTGACGCCGTGGTTGTGGGACCCGATCGACGACCATAAACACACAACCCATGGGATCTTGCTTAGGTTGGCCCGTTGCGGAGACCACGAACTGGCTCGCGACGCTGCAACCAAAGTGC
GGGTAGCGCTAGGTTGACGCCGTGGTTGTGGGACCCGATCGACGACCTGCCTAGTTGGCCCCTGAGATAAAGCCTTGTCCGTTGCGGAGACCACGAACTGGCTCGCGACGCTGCAACCAAAGTGC
GGGTAGCGCTAGGTTGACGCCGTGGTTGTGGGACCCGATCGACGACCTTTTCGCTTCCCTGTTTTAGCTGCTGGCGACCGTTGCGGAGACCACGAACTGGCTCGCGACGCTGCAACCAAAGTGC
GGGTAGCGCTAGGTTGACGCCGTGGTTGTGGGACCCGATCGACGACCTCAGCCATCACTTGGATGAGTTCATGTATTGCTTTGCCCGTTGCGGAGACCACGAACTGGCTCGCGACGCTGCAACCAAAGTGC
GGGTAGCGCTAGGTTGACGCCGTGGTTGTGGGACCCGATCGACGACCTCTCACTGTTGTGCATAGCAGATTAATCCGGAAACCTCCGTTGCGGAGACCACGAACTGGCTCGCGACGCTGCAACCAAAGTGC
GGGTAGCGCTAGGTTGACGCCGTGGTTGTGGGACCCGATCGACGACCGTCAAAGACCTCAGAGATCCAGGTGCATGAAGTGGCCGTTGCGGAGACCACGAACTGGCTCGCGACGCTGCAACCAAAGTGC
GGGTAGCGCTAGGTTGACGCCGTGGTTGTGGGACCCGATCGACGACCGAATTGCAACAACTTTTCCAGTACCCTGCCTTCTAGGCCGTTGCGGAGACCACGAACTGGCTCGCGACGCTGCAACCAAAGTGC
GGGTAGCGCTAGGTTGACGCCGTGGTTGTGGGACCCGATCGACGACCGAACTACTTGCATCTCCTCACTCTAACCAATAGGGCCCCGTTGCGGAGACCACGAACTGGCTCGCGACGCTGCAACCAAAGTGC
GGGTAGCGCTAGGTTGACGCCGTGGTTGTGGGACCCGATCGACGACCTAAAATGTGGACCATTTACCTTCCTCTTGGCTCTGCCCCGTTGCGGAGACCACGAACTGGCTCGCGACGCTGCAACCAAAGTGC
GGGTAGCGCTAGGTTGACGCCGTGGTTGTGGGACCCGATCGACGACCTCTTGGGAACACTATGGCTACTCACCACATTTCTGAGCCGTTGCGGAGACCACGAACTGGCTCGCGACGCTGCAACCAAAGTGC
GGGTAGCGCTAGGTTGACGCCGTGGTTGTGGGACCCGATCGACGACCTAGAGCTCACTCAAGATTGCCCATCAAGAAACAGGACCGTTGCGGAGACCACGAACTGGCTCGCGACGCTGCAACCAAAGTGC
GGGTAGCGCTAGGTTGACGCCGTGGTTGTGGGACCCGATCGACGACCTAAGAGACTTATCCAGGACTGAACAGTAAGCCAGGGGCCGTTGCGGAGACCACGAACTGGCTCGCGACGCTGCAACCAAAGTGC
GGGTAGCGCTAGGTTGACGCCGTGGTTGTGGGACCCGATCGACGACCATAACCAAAGGAGACCTGTTGCCATGTCTCTCCTCCGTTGCGGAGACCACGAACTGGCTCGCGACGCTGCAACCAAAGTGC
GGGTAGCGCTAGGTTGACGCCGTGGTTGTGGGACCCGATCGACGACCGGGGCTTACATGAGAGGAGTGAGAGGCAGGCCGTTGCGGAGACCACGAACTGGCTCGCGACGCTGCAACCAAAGTGC
GGGTAGCGCTAGGTTGACGCCGTGGTTGTGGGACCCGATCGACGACCATCCTAAGAACACAAATGCTAGCTTGAAGACCCTGGTCCGTTGCGGAGACCACGAACTGGCTCGCGACGCTGCAACCAAAGTGC
GGGTAGCGCTAGGTTGACGCCGTGGTTGTGGGACCCGATCGACGACCATCAAAGTCAACCCCAAAGGAATCTAGAGGCCTTTGTCCGTTGCGGAGACCACGAACTGGCTCGCGACGCTGCAACCAAAGTGC
GGGTAGCGCTAGGTTGACGCCGTGGTTGTGGGACCCGATCGACGACCAACAAACAGCAACCATTCTTGCTTCTAATTGGGCAGTCCGTTGCGGAGACCACGAACTGGCTCGCGACGCTGCAACCAAAGTGC
GGGTAGCGCTAGGTTGACGCCGTGGTTGTGGGACCCGATCGACGACCACAATCTGATAGGTTGGCTAGAGACTTGCAGTGGGCCGTTGCGGAGACCACGAACTGGCTCGCGACGCTGCAACCAAAGTGC
GGGTAGCGCTAGGTTGACGCCGTGGTTGTGGGACCCGATCGACGACCTTCCATCATATGAGCAAGGGACAATGAGAGAACTGCTCCGTTGCGGAGACCACGAACTGGCTCGCGACGCTGCAACCAAAGTGC
GGGTAGCGCTAGGTTGACGCCGTGGTTGTGGGACCCGATCGACGACCTCTCAGTACTCCCCGCTTCTTCCTCACCTACTCCGTTGCGGAGACCACGAACTGGCTCGCGACGCTGCAACCAAAGTGC
GGGTAGCGCTAGGTTGACGCCGTGGTTGTGGGACCCGATCGACGACCTCTTCACTGGATTTGTCAACTCACCTGTCTTTACGCACCGTTGCGGAGACCACGAACTGGCTCGCGACGCTGCAACCAAAGTGC
GGGTAGCGCTAGGTTGACGCCGTGGTTGTGGGACCCGATCGACGACCACTTCAGCGATTCTCTTACTGGCTTTGCAAAGTCACCCGTTGCGGAGACCACGAACTGGCTCGCGACGCTGCAACCAAAGTGC
GGGTAGCGCTAGGTTGACGCCGTGGTTGTGGGACCCGATCGACGACCACTTTCTGGAGAATAAATGCTTTGCAAGACCCTCGGCCCGTTGCGGAGACCACGAACTGGCTCGCGACGCTGCAACCAAAGTGC
GGGTAGCGCTAGGTTGACGCCGTGGTTGTGGGACCCGATCGACGACCACTTGACATTCATGTCTTCCTTGATGGTCTCCACACTCCGTTGCGGAGACCACGAACTGGCTCGCGACGCTGCAACCAAAGTGC
GGGTAGCGCTAGGTTGACGCCGTGGTTGTGGGACCCGATCGACGACCTTTCTGTCACTCTCCTTGGAAGGAAAGAGCACAAACACCGTTGCGGAGACCACGAACTGGCTCGCGACGCTGCAACCAAAGTGC
GGGTAGCGCTAGGTTGACGCCGTGGTTGTGGGACCCGATCGACGACCTCAGAAAGCAAGCAACAGGAAAATTAGCCAAATGGGACCGTTGCGGAGACCACGAACTGGCTCGCGACGCTGCAACCAAAGTGC
GGGTAGCGCTAGGTTGACGCCGTGGTTGTGGGACCCGATCGACGACCCAAATGAGCTCAACAAAGCTGATACTCCAAAGGTCCCCCGTTGCGGAGACCACGAACTGGCTCGCGACGCTGCAACCAAAGTGC
GGGTAGCGCTAGGTTGACGCCGTGGTTGTGGGACCCGATCGACGACCAAAACAGCAAAGCCACCCCACTATAAAATACTGCCCCCGTTGCGGAGACCACGAACTGGCTCGCGACGCTGCAACCAAAGTGC
GGGTAGCGCTAGGTTGACGCCGTGGTTGTGGGACCCGATCGACGACCAATTCTTCCAAAATCCCAGTGAGCAACGAAGTTCCGCCGTTGCGGAGACCACGAACTGGCTCGCGACGCTGCAACCAAAGTGC
GGGTAGCGCTAGGTTGACGCCGTGGTTGTGGGACCCGATCGACGACCACTCCTTGACTATCACAACTGAATGAGTTCCCACCACCCGTTGCGGAGACCACGAACTGGCTCGCGACGCTGCAACCAAAGTGC
GGGTAGCGCTAGGTTGACGCCGTGGTTGTGGGACCCGATCGACGACCTGACTGCCTACAAGAGATGACAGCCTATCAGAGATGCCCGTTGCGGAGACCACGAACTGGCTCGCGACGCTGCAACCAAAGTGC
GGGTAGCGCTAGGTTGACGCCGTGGTTGTGGGACCCGATCGACGACCAGGTTTTCTGCTTCTTTTACATATGGGTCCTGGCAGTCCGTTGCGGAGACCACGAACTGGCTCGCGACGCTGCAACCAAAGTGC
GGGTAGCGCTAGGTTGACGCCGTGGTTGTGGGACCCGATCGACGACCAACAGCCAAGAGAACCCAAAACGATGCAGAGCCCGTTGCGGAGACCACGAACTGGCTCGCGACGCTGCAACCAAAGTGC
GGGTAGCGCTAGGTTGACGCCGTGGTTGTGGGACCCGATCGACGACCAGCTGATCTTCAGATGATCAGAACAATGTGCTGCACCCCGTTGCGGAGACCACGAACTGGCTCGCGACGCTGCAACCAAAGTGC
GGGTAGCGCTAGGTTGACGCCGTGGTTGTGGGACCCGATCGACGACCAGAGTTTCCTTTAGACTCCTTGGGTCCTTTGACGATGCCGTTGCGGAGACCACGAACTGGCTCGCGACGCTGCAACCAAAGTGC
GGGTAGCGCTAGGTTGACGCCGTGGTTGTGGGACCCGATCGACGACCAGACAGACCCATTATGCCCACCTGTGCCATCCGTTGCGGAGACCACGAACTGGCTCGCGACGCTGCAACCAAAGTGC
GGGTAGCGCTAGGTTGACGCCGTGGTTGTGGGACCCGATCGACGACCCTGGTGGGATTCTTTGAAGGCACTTTTACTTCACACCCCGTTGCGGAGACCACGAACTGGCTCGCGACGCTGCAACCAAAGTGC
GGGTAGCGCTAGGTTGACGCCGTGGTTGTGGGACCCGATCGACGACCTTTTGTACCTCCCCACTTCGCCCTGGTAAAATGTCCGTTGCGGAGACCACGAACTGGCTCGCGACGCTGCAACCAAAGTGC
GGGTAGCGCTAGGTTGACGCCGTGGTTGTGGGACCCGATCGACGACCTTCACAAAGCACATTGATCATTTGCTTGTGGTTGGGACCGTTGCGGAGACCACGAACTGGCTCGCGACGCTGCAACCAAAGTGC
GGGTAGCGCTAGGTTGACGCCGTGGTTGTGGGACCCGATCGACGACCACGAAATTCTAGGGCCTCTCAAACCTTTACAAAGGGGCCGTTGCGGAGACCACGAACTGGCTCGCGACGCTGCAACCAAAGTGC
GGGTAGCGCTAGGTTGACGCCGTGGTTGTGGGACCCGATCGACGACCAAAAGCCCTCCACTCTTTGGTTCAAACCCACTGAACGGCCCTAAGCCTCACCGAGCAGCCGACGCTGCAACCAAAGTGC
GGGTAGCGCTAGGTTGACGCCGTGGTTGTGGGACCCGATCGACGACCAATGCTTGCCTAAGGCTCTCTTTTGAGTTATTTGCCCGAACGGCCCTAAGCCTCACCGAGCAGCCGACGCTGCAACCAAAGTGC
GGGTAGCGCTAGGTTGACGCCGTGGTTGTGGGACCCGATCGACGACCAGAAACATGATGCTGTGTCTCTTTAGCCAACACTTGCGAACGGCCCTAAGCCTCACCGAGCAGCCGACGCTGCAACCAAAGTGC
GGGTAGCGCTAGGTTGACGCCGTGGTTGTGGGACCCGATCGACGACCAAAAGCCAGAAAGCTCTTTGAGGGGCGATCTTGAACGGCCCTAAGCCTCACCGAGCAGCCGACGCTGCAACCAAAGTGC
GGGTAGCGCTAGGTTGACGCCGTGGTTGTGGGACCCGATCGACGACCTGTTGCATACAAAGCTCTACTGTTGCTCTGCTCAAGAGAACGGCCCTAAGCCTCACCGAGCAGCCGACGCTGCAACCAAAGTGC
GGGTAGCGCTAGGTTGACGCCGTGGTTGTGGGACCCGATCGACGACCAAAATTACGTCCAGAGAACGTGCTTGCAGGTGGGAACGGCCCTAAGCCTCACCGAGCAGCCGACGCTGCAACCAAAGTGC
GGGTAGCGCTAGGTTGACGCCGTGGTTGTGGGACCCGATCGACGACCCACAGGGATTTGGGTCAGAGCCTGAGACACTGAACGGCCCTAAGCCTCACCGAGCAGCCGACGCTGCAACCAAAGTGC
GGGTAGCGCTAGGTTGACGCCGTGGTTGTGGGACCCGATCGACGACCTTGCAGGTTCTCAATACCTTCCAATGCCCAACCGAACGGCCCTAAGCCTCACCGAGCAGCCGACGCTGCAACCAAAGTGC
GGGTAGCGCTAGGTTGACGCCGTGGTTGTGGGACCCGATCGACGACCTCTGAGTCACTGGAAGGAATGTTCCCAACTGTCTGGAACGGCCCTAAGCCTCACCGAGCAGCCGACGCTGCAACCAAAGTGC
GGGTAGCGCTAGGTTGACGCCGTGGTTGTGGGACCCGATCGACGACCAAAATTAGTTCTGCCTGGTCCTTGATTGCTCCACTGGGAACGGCCCTAAGCCTCACCGAGCAGCCGACGCTGCAACCAAAGTGC
GGGTAGCGCTAGGTTGACGCCGTGGTTGTGGGACCCGATCGACGACCTGGGATCCATAAGAGGGAATGATATACTGCCTAGCCAGAACGGCCCTAAGCCTCACCGAGCAGCCGACGCTGCAACCAAAGTGC
GGGTAGCGCTAGGTTGACGCCGTGGTTGTGGGACCCGATCGACGACCATCCAAGCTCTAATAACTCTTGATGGCATGGCCAAGCGAACGGCCCTAAGCCTCACCGAGCAGCCGACGCTGCAACCAAAGTGC
GGGTAGCGCTAGGTTGACGCCGTGGTTGTGGGACCCGATCGACGACCTTCTGCCTGTAAAACACCTTTTGTTGCACATGCAAACGAACGGCCCTAAGCCTCACCGAGCAGCCGACGCTGCAACCAAAGTGC
GGGTAGCGCTAGGTTGACGCCGTGGTTGTGGGACCCGATCGACGACCTAGAGGTTTCACACTTTGTTGGTTTGGCCAGTTCTGGAACGGCCCTAAGCCTCACCGAGCAGCCGACGCTGCAACCAAAGTGC
GGGTAGCGCTAGGTTGACGCCGTGGTTGTGGGACCCGATCGACGACCACTTTAAAAGTTTTGCAAAGCCATCAGGAGCCAAGGTGAACGGCCCTAAGCCTCACCGAGCAGCCGACGCTGCAACCAAAGTGC
GGGTAGCGCTAGGTTGACGCCGTGGTTGTGGGACCCGATCGACGACCAAGCCAAAACTTACACCTTGGTTTCCCTTTTCCTCTGGAACGGCCCTAAGCCTCACCGAGCAGCCGACGCTGCAACCAAAGTGC
GGGTAGCGCTAGGTTGACGCCGTGGTTGTGGGACCCGATCGACGACCTCATCAGCAGTCACATCCTAGCACTCACAACCAGAACGGCCCTAAGCCTCACCGAGCAGCCGACGCTGCAACCAAAGTGC
GGGTAGCGCTAGGTTGACGCCGTGGTTGTGGGACCCGATCGACGACCCCCCACGCTATTTTGACTTCCGGAACTCCTGGAACGGCCCTAAGCCTCACCGAGCAGCCGACGCTGCAACCAAAGTGC
GGGTAGCGCTAGGTTGACGCCGTGGTTGTGGGACCCGATCGACGACCACATCATGCAAGCCAAACCTACGGAAGAAGCAGAACGGCCCTAAGCCTCACCGAGCAGCCGACGCTGCAACCAAAGTGC
GGGTAGCGCTAGGTTGACGCCGTGGTTGTGGGACCCGATCGACGACCACAGAATAGAAGTCCACACGGAGTCAGATTTTCCCCGAACGGCCCTAAGCCTCACCGAGCAGCCGACGCTGCAACCAAAGTGC
GGGTAGCGCTAGGTTGACGCCGTGGTTGTGGGACCCGATCGACGACCAATGCACCAAGTGCCAAATACTTCGATTGATATGGGGGAACGGCCCTAAGCCTCACCGAGCAGCCGACGCTGCAACCAAAGTGC
GGGTAGCGCTAGGTTGACGCCGTGGTTGTGGGACCCGATCGACGACCTACCCCAGTGATCTCAAGAAATGAGTTGTCCTCAGGGGAACGGCCCTAAGCCTCACCGAGCAGCCGACGCTGCAACCAAAGTGC
GGGTAGCGCTAGGTTGACGCCGTGGTTGTGGGACCCGATCGACGACCTAGCCCCTGAAATGGCAATGGCATGAGGCTGAACGGCCCTAAGCCTCACCGAGCAGCCGACGCTGCAACCAAAGTGC
GGGTAGCGCTAGGTTGACGCCGTGGTTGTGGGACCCGATCGACGACCAAAAGTTCTATACAGCAGACTGGCAGGTTCACGTTCTGAACGGCCCTAAGCCTCACCGAGCAGCCGACGCTGCAACCAAAGTGC
GGGTAGCGCTAGGTTGACGCCGTGGTTGTGGGACCCGATCGACGACCCTCCTATGCTACCTGGCAGAGGAATTCTGAGTCCGAACGGCCCTAAGCCTCACCGAGCAGCCGACGCTGCAACCAAAGTGC
GGGTAGCGCTAGGTTGACGCCGTGGTTGTGGGACCCGATCGACGACCACCTGTCATTATTACCATGTCACCAATCCCTGAACCAGAACGGCCCTAAGCCTCACCGAGCAGCCGACGCTGCAACCAAAGTGC
GGGTAGCGCTAGGTTGACGCCGTGGTTGTGGGACCCGATCGACGACCAAAAGTCATGAGATACCATTCTGGGCCAAGGCCAGAACGGCCCTAAGCCTCACCGAGCAGCCGACGCTGCAACCAAAGTGC
GGGTAGCGCTAGGTTGACGCCGTGGTTGTGGGACCCGATCGACGACCAAGAAAGCCCCTGAGAATCCTTCCAGCTCTCTGAACGGCCCTAAGCCTCACCGAGCAGCCGACGCTGCAACCAAAGTGC
GGGTAGCGCTAGGTTGACGCCGTGGTTGTGGGACCCGATCGACGACCGATAAGGGTCACATGTTTTGAGGACACGAAACATGGCGAACGGCCCTAAGCCTCACCGAGCAGCCGACGCTGCAACCAAAGTGC
GGGTAGCGCTAGGTTGACGCCGTGGTTGTGGGACCCGATCGACGACCAAATCTGGATTTGGCTCCAGTAAAACGGAGCTTAGGAGAACGGCCCTAAGCCTCACCGAGCAGCCGACGCTGCAACCAAAGTGC
GGGTAGCGCTAGGTTGACGCCGTGGTTGTGGGACCCGATCGACGACCGCTGCAACCAGCCTAGCTACTGCTCTCTAATTTGGAACGGCCCTAAGCCTCACCGAGCAGCCGACGCTGCAACCAAAGTGC
GGGTAGCGCTAGGTTGACGCCGTGGTTGTGGGACCCGATCGACGACCCTTCTGCAGAGCACCATGCAGGAACAAATTGGTGAACGGCCCTAAGCCTCACCGAGCAGCCGACGCTGCAACCAAAGTGC
GGGTAGCGCTAGGTTGACGCCGTGGTTGTGGGACCCGATCGACGACCTGTACCACTCTGCTCCAGAATCAAACCCTAGAAAGTGGAACGGCCCTAAGCCTCACCGAGCAGCCGACGCTGCAACCAAAGTGC
GGGTAGCGCTAGGTTGACGCCGTGGTTGTGGGACCCGATCGACGACCAGTCTAATGAACACGGATGAGTTGACTGCCTGCTGAACGGCCCTAAGCCTCACCGAGCAGCCGACGCTGCAACCAAAGTGC
GGGTAGCGCTAGGTTGACGCCGTGGTTGTGGGACCCGATCGACGACCTATCCTTTGGATTTCATGATGAGGTACAGGCAACCCCGAACGGCCCTAAGCCTCACCGAGCAGCCGACGCTGCAACCAAAGTGC
GGGTAGCGCTAGGTTGACGCCGTGGTTGTGGGACCCGATCGACGACCAAATGACCTCAACAGGGACATTCAGAAGCACTCTTGAGAACGGCCCTAAGCCTCACCGAGCAGCCGACGCTGCAACCAAAGTGC
GGGTAGCGCTAGGTTGACGCCGTGGTTGTGGGACCCGATCGACGACCACATTCTGTCTAGGAAGACTTTTGGAACAGAGGCTGGGAACGGCCCTAAGCCTCACCGAGCAGCCGACGCTGCAACCAAAGTGC
GGGTAGCGCTAGGTTGACGCCGTGGTTGTGGGACCCGATCGACGACCTACTTTAATGGCTTTAGAGCAAACACCGTCACTGCCTGAACGGCCCTAAGCCTCACCGAGCAGCCGACGCTGCAACCAAAGTGC
GGGTAGCGCTAGGTTGACGCCGTGGTTGTGGGACCCGATCGACGACCAACCCAAGAATGGGAAATATTTCTTGTCACCCCAGGTGAACGGCCCTAAGCCTCACCGAGCAGCCGACGCTGCAACCAAAGTGC
GGGTAGCGCTAGGTTGACGCCGTGGTTGTGGGACCCGATCGACGACCCCCCAAGGTGCCTTCCATCTCTCGGCAAAGGAACGGCCCTAAGCCTCACCGAGCAGCCGACGCTGCAACCAAAGTGC
GGGTAGCGCTAGGTTGACGCCGTGGTTGTGGGACCCGATCGACGACCTTCTTAGTCACCTGATAGGATTTCCCAGGACAGAGGTGAACGGCCCTAAGCCTCACCGAGCAGCCGACGCTGCAACCAAAGTGC
GGGTAGCGCTAGGTTGACGCCGTGGTTGTGGGACCCGATCGACGACCGTCAAGCCAATTCTGACCTAACTTCCCATGTCCTTCCGAACGGCCCTAAGCCTCACCGAGCAGCCGACGCTGCAACCAAAGTGC
GGGTAGCGCTAGGTTGACGCCGTGGTTGTGGGACCCGATCGACGACCCCCCACCTGGTGCTGATGTCATTCCTCTCTGAACGGCCCTAAGCCTCACCGAGCAGCCGACGCTGCAACCAAAGTGC
GGGTAGCGCTAGGTTGACGCCGTGGTTGTGGGACCCGATCGACGACCTCAGCCCAGCGTCTCAATGCACTCAGGGACGAACGGCCCTAAGCCTCACCGAGCAGCCGACGCTGCAACCAAAGTGC
GGGTAGCGCTAGGTTGACGCCGTGGTTGTGGGACCCGATCGACGACCGCTTCTGCCTCTGCAAAGAGCAAAGGCTTCAGAACGGCCCTAAGCCTCACCGAGCAGCCGACGCTGCAACCAAAGTGC
GGGTAGCGCTAGGTTGACGCCGTGGTTGTGGGACCCGATCGACGACCAGTGATGGCCTTGCATGGTAGCATTCTCTATCACAGAACGGCCCTAAGCCTCACCGAGCAGCCGACGCTGCAACCAAAGTGC
GGGTAGCGCTAGGTTGACGCCGTGGTTGTGGGACCCGATCGACGACCTTTATTTGAAGAACTGCAAGGAAACCACCTGCAGAGCGAACGGCCCTAAGCCTCACCGAGCAGCCGACGCTGCAACCAAAGTGC
GGGTAGCGCTAGGTTGACGCCGTGGTTGTGGGACCCGATCGACGACCTCCCAAGACCTCAAGAGTTTGTTTTGCACCTTCGGAACGGCCCTAAGCCTCACCGAGCAGCCGACGCTGCAACCAAAGTGC
GGGTAGCGCTAGGTTGACGCCGTGGTTGTGGGACCCGATCGACGACCCTCTTCTGAGGTAATCACACCTGCTGCCACAGCGAACGGCCCTAAGCCTCACCGAGCAGCCGACGCTGCAACCAAAGTGC
GGGTAGCGCTAGGTTGACGCCGTGGTTGTGGGACCCGATCGACGACCGGGGTGGAACCAGCAGGGCCATTTAGCCAGGAACGGCCCTAAGCCTCACCGAGCAGCCGACGCTGCAACCAAAGTGC
GGGTAGCGCTAGGTTGACGCCGTGGTTGTGGGACCCGATCGACGACCGGCTGCAAGCCCAAACAGATCTCTATTCTTCAGCGAACGGCCCTAAGCCTCACCGAGCAGCCGACGCTGCAACCAAAGTGC
GGGTAGCGCTAGGTTGACGCCGTGGTTGTGGGACCCGATCGACGACCTGCAAGTTAGTGCCCAAGCCACATAGGGAATAGGGAACGGCCCTAAGCCTCACCGAGCAGCCGACGCTGCAACCAAAGTGC
GGGTAGCGCTAGGTTGACGCCGTGGTTGTGGGACCCGATCGACGACCACACATGCTGATGTTAGCTTTAAACTATGCCTGCCCGAACGGCCCTAAGCCTCACCGAGCAGCCGACGCTGCAACCAAAGTGC
GGGTAGCGCTAGGTTGACGCCGTGGTTGTGGGACCCGATCGACGACCTCCTAAAAGCTGTGTTACTGCCAATCTCAAAAGCTGCGAACGGCCCTAAGCCTCACCGAGCAGCCGACGCTGCAACCAAAGTGC
GGGTAGCGCTAGGTTGACGCCGTGGTTGTGGGACCCGATCGACGACCAGCTGTCACTTCTGCTTCTCTTTGTGAGACAATGTCAGAACGGCCCTAAGCCTCACCGAGCAGCCGACGCTGCAACCAAAGTGC
GGGTAGCGCTAGGTTGACGCCGTGGTTGTGGGACCCGATCGACGACCATCCTGCCTCCCACAGAGCAGCATTCACCAGAACGGCCCTAAGCCTCACCGAGCAGCCGACGCTGCAACCAAAGTGC
GGGTAGCGCTAGGTTGACGCCGTGGTTGTGGGACCCGATCGACGACCTGGGGCTCCAACAGTTCAAATGAATTCCCACCGAACGGCCCTAAGCCTCACCGAGCAGCCGACGCTGCAACCAAAGTGC
GGGTAGCGCTAGGTTGACGCCGTGGTTGTGGGACCCGATCGACGACCAGCCAGCTTCTATAGAGGAAGGAAAGGTACTGGATGGGAACGGCCCTAAGCCTCACCGAGCAGCCGACGCTGCAACCAAAGTGC
GGGTAGCGCTAGGTTGACGCCGTGGTTGTGGGACCCGATCGACGACCACATGCCAAAACTCAAAGAGTTGAAAAGCACTCCTGAGAACGGCCCTAAGCCTCACCGAGCAGCCGACGCTGCAACCAAAGTGC
GGGTAGCGCTAGGTTGACGCCGTGGTTGTGGGACCCGATCGACGACCAAAAGCCAACAAACAAGGCTGCCAGGTGTGGAGAGCGCAGGTCCTTAGCGAGCGCTGCGACGCTGCAACCAAAGTGC
GGGTAGCGCTAGGTTGACGCCGTGGTTGTGGGACCCGATCGACGACCAGGTGGCTCTCAAAGCAGCTGTCTTAGTCACCGAGAGCGCAGGTCCTTAGCGAGCGCTGCGACGCTGCAACCAAAGTGC
GGGTAGCGCTAGGTTGACGCCGTGGTTGTGGGACCCGATCGACGACCACATAATCTAGCCACCCTAAGCATCCTCCTCTTGTGTGAGAGCGCAGGTCCTTAGCGAGCGCTGCGACGCTGCAACCAAAGTGC
GGGTAGCGCTAGGTTGACGCCGTGGTTGTGGGACCCGATCGACGACCTCTCTCCATGGTGGTGACATCAACTCTATCCAGTACCGAGAGCGCAGGTCCTTAGCGAGCGCTGCGACGCTGCAACCAAAGTGC
GGGTAGCGCTAGGTTGACGCCGTGGTTGTGGGACCCGATCGACGACCCTGAGAGGAAACCTCTCCCACATCAGCTCAGTGAGAGCGCAGGTCCTTAGCGAGCGCTGCGACGCTGCAACCAAAGTGC
GGGTAGCGCTAGGTTGACGCCGTGGTTGTGGGACCCGATCGACGACCAGCTTTCTGTCCGTCCTTGGAAACAGCCTTATTATCTGAGAGCGCAGGTCCTTAGCGAGCGCTGCGACGCTGCAACCAAAGTGC
GGGTAGCGCTAGGTTGACGCCGTGGTTGTGGGACCCGATCGACGACCTTCCTGAACCCTGATAGCTGCCTAACTAGCTCTTGAGAGAGCGCAGGTCCTTAGCGAGCGCTGCGACGCTGCAACCAAAGTGC
GGGTAGCGCTAGGTTGACGCCGTGGTTGTGGGACCCGATCGACGACCTTCCAAAAGGAAAATCTGATTAGGGAAGGCCTTCCCTGAGAGCGCAGGTCCTTAGCGAGCGCTGCGACGCTGCAACCAAAGTGC
GGGTAGCGCTAGGTTGACGCCGTGGTTGTGGGACCCGATCGACGACCAGTTATTTAACTTGTTGCAGGAGACCATCCCTGTGCTGAGAGCGCAGGTCCTTAGCGAGCGCTGCGACGCTGCAACCAAAGTGC
GGGTAGCGCTAGGTTGACGCCGTGGTTGTGGGACCCGATCGACGACCTCTGCCTACCCACCCATCCTCATGTCAGCAGAGAGCGCAGGTCCTTAGCGAGCGCTGCGACGCTGCAACCAAAGTGC
GGGTAGCGCTAGGTTGACGCCGTGGTTGTGGGACCCGATCGACGACCTCTCTGACTCCCATTTTAAACTCCAGCATTGCCATCTGAGAGCGCAGGTCCTTAGCGAGCGCTGCGACGCTGCAACCAAAGTGC
GGGTAGCGCTAGGTTGACGCCGTGGTTGTGGGACCCGATCGACGACCGGATTTCAGCACCAAGCTCTTGCTGAACCCAGAGAGCGCAGGTCCTTAGCGAGCGCTGCGACGCTGCAACCAAAGTGC
GGGTAGCGCTAGGTTGACGCCGTGGTTGTGGGACCCGATCGACGACCTACCAGTGCTATCAACATGCCTTCCATAAACCTCTGGGAGAGCGCAGGTCCTTAGCGAGCGCTGCGACGCTGCAACCAAAGTGC
GGGTAGCGCTAGGTTGACGCCGTGGTTGTGGGACCCGATCGACGACCCCCCTCCAATTTCTAGTCCCTGCCCTCTCGGAGAGCGCAGGTCCTTAGCGAGCGCTGCGACGCTGCAACCAAAGTGC
GGGTAGCGCTAGGTTGACGCCGTGGTTGTGGGACCCGATCGACGACCGGATCCCGCCCACTGGTAAATCTCTAGCCCGAGAGCGCAGGTCCTTAGCGAGCGCTGCGACGCTGCAACCAAAGTGC
GGGTAGCGCTAGGTTGACGCCGTGGTTGTGGGACCCGATCGACGACCATTCACTCACTCTTGGCTGTTGCTTCTCCTTACACTGAGAGCGCAGGTCCTTAGCGAGCGCTGCGACGCTGCAACCAAAGTGC
GGGTAGCGCTAGGTTGACGCCGTGGTTGTGGGACCCGATCGACGACCTTTCACCCACCTTTGAAGCACGCCATTTCCTGAGAGCGCAGGTCCTTAGCGAGCGCTGCGACGCTGCAACCAAAGTGC
GGGTAGCGCTAGGTTGACGCCGTGGTTGTGGGACCCGATCGACGACCCCTGTTTCTTTTGGCTGAGTTAGTCCACTTGTGGTGGAGAGCGCAGGTCCTTAGCGAGCGCTGCGACGCTGCAACCAAAGTGC
GGGTAGCGCTAGGTTGACGCCGTGGTTGTGGGACCCGATCGACGACCCATTCCATGCCCTGGATGTTTCCCCATCTGGGAGAGCGCAGGTCCTTAGCGAGCGCTGCGACGCTGCAACCAAAGTGC
GGGTAGCGCTAGGTTGACGCCGTGGTTGTGGGACCCGATCGACGACCTGGGGTCATCAGTAAAAGGATCAAAGCACACAGAACCGAGAGCGCAGGTCCTTAGCGAGCGCTGCGACGCTGCAACCAAAGTGC
GGGTAGCGCTAGGTTGACGCCGTGGTTGTGGGACCCGATCGACGACCCAAGCGGCTTATTCATTTTGGGGTGTGGACTTATCAGAGAGCGCAGGTCCTTAGCGAGCGCTGCGACGCTGCAACCAAAGTGC
GGGTAGCGCTAGGTTGACGCCGTGGTTGTGGGACCCGATCGACGACCTTCCTGAAGGTCTTAATTTTCTGGAAGCCATGCTGGAGAGAGCGCAGGTCCTTAGCGAGCGCTGCGACGCTGCAACCAAAGTGC
GGGTAGCGCTAGGTTGACGCCGTGGTTGTGGGACCCGATCGACGACCAATCCACTACAACCACCCTTTATGTACACGTAGCTGGGAGAGCGCAGGTCCTTAGCGAGCGCTGCGACGCTGCAACCAAAGTGC
GGGTAGCGCTAGGTTGACGCCGTGGTTGTGGGACCCGATCGACGACCAAAGGAGGGCAAAGCCAGAGAAATAGGGAAGAGGGAGAGCGCAGGTCCTTAGCGAGCGCTGCGACGCTGCAACCAAAGTGC
GGGTAGCGCTAGGTTGACGCCGTGGTTGTGGGACCCGATCGACGACCTCTCGGGATCTGCACAGTGAGTTTGTGGAGCGAGAGCGCAGGTCCTTAGCGAGCGCTGCGACGCTGCAACCAAAGTGC
GGGTAGCGCTAGGTTGACGCCGTGGTTGTGGGACCCGATCGACGACCAAAGATAACTCCAATAAACCACCTTCAGGGAGCCTGCGAGAGCGCAGGTCCTTAGCGAGCGCTGCGACGCTGCAACCAAAGTGC
GGGTAGCGCTAGGTTGACGCCGTGGTTGTGGGACCCGATCGACGACCTCGAAGTACTTGGCATGCTGGCTCCTTACACGGAGAGCGCAGGTCCTTAGCGAGCGCTGCGACGCTGCAACCAAAGTGC
GGGTAGCGCTAGGTTGACGCCGTGGTTGTGGGACCCGATCGACGACCTGAAACCCTTAGAGCTCTACCAGGCATACAGTGAACTGAGAGCGCAGGTCCTTAGCGAGCGCTGCGACGCTGCAACCAAAGTGC
GGGTAGCGCTAGGTTGACGCCGTGGTTGTGGGACCCGATCGACGACCCAAGTCTGCATGAATACCAACAGATGAGGCCATCGGAGAGCGCAGGTCCTTAGCGAGCGCTGCGACGCTGCAACCAAAGTGC
GGGTAGCGCTAGGTTGACGCCGTGGTTGTGGGACCCGATCGACGACCGAAGAAGGGCTCCTAAGAAAGAGAAACCACACACAGAGAGAGCGCAGGTCCTTAGCGAGCGCTGCGACGCTGCAACCAAAGTGC
GGGTAGCGCTAGGTTGACGCCGTGGTTGTGGGACCCGATCGACGACCAAGGAAGAAGTGAATATGACCCATGCTCACACACCAGAGAGCGCAGGTCCTTAGCGAGCGCTGCGACGCTGCAACCAAAGTGC
GGGTAGCGCTAGGTTGACGCCGTGGTTGTGGGACCCGATCGACGACCTTCTGTTGGCAGCATCATTATCTGTAGCTGCTTCAGTGAGAGCGCAGGTCCTTAGCGAGCGCTGCGACGCTGCAACCAAAGTGC
GGGTAGCGCTAGGTTGACGCCGTGGTTGTGGGACCCGATCGACGACCTGCTATTGTCTCCTAGGACTTGTCTTGGCCATTTTGAGAGAGCGCAGGTCCTTAGCGAGCGCTGCGACGCTGCAACCAAAGTGC
GGGTAGCGCTAGGTTGACGCCGTGGTTGTGGGACCCGATCGACGACCCCCCAGCGTAGCAGCAAAGCACCATTAACTGAGAGCGCAGGTCCTTAGCGAGCGCTGCGACGCTGCAACCAAAGTGC
GGGTAGCGCTAGGTTGACGCCGTGGTTGTGGGACCCGATCGACGACCATCATTTCCACCGACAGCTGAAGTTGTGGTTTTGCGAGAGCGCAGGTCCTTAGCGAGCGCTGCGACGCTGCAACCAAAGTGC
GGGTAGCGCTAGGTTGACGCCGTGGTTGTGGGACCCGATCGACGACCAAAACTGAGTTCCTCACTTGTGGGTAAAGGCAAGTCAGAGAGCGCAGGTCCTTAGCGAGCGCTGCGACGCTGCAACCAAAGTGC
GGGTAGCGCTAGGTTGACGCCGTGGTTGTGGGACCCGATCGACGACCTTTTCAGTAGATGAGGTGAGCAGGAAGCAGCAATCTGAGAGCGCAGGTCCTTAGCGAGCGCTGCGACGCTGCAACCAAAGTGC
GGGTAGCGCTAGGTTGACGCCGTGGTTGTGGGACCCGATCGACGACCAACAAGGCATTTGATCTGACTAAGTGCCTACAAGGCCGAGAGCGCAGGTCCTTAGCGAGCGCTGCGACGCTGCAACCAAAGTGC
GGGTAGCGCTAGGTTGACGCCGTGGTTGTGGGACCCGATCGACGACCTGGGCAAAGTACACCATTACTTTGTGGTTAGTGCTTGGAGAGCGCAGGTCCTTAGCGAGCGCTGCGACGCTGCAACCAAAGTGC
GGGTAGCGCTAGGTTGACGCCGTGGTTGTGGGACCCGATCGACGACCATTCATGGTTTGGTGCCAACTTCAATTATGTGGTCCCGAGAGCGCAGGTCCTTAGCGAGCGCTGCGACGCTGCAACCAAAGTGC
GGGTAGCGCTAGGTTGACGCCGTGGTTGTGGGACCCGATCGACGACCCCCTCTGAGCATGTTAGAACTTTTCAGAGTTTGCTGCGAGAGCGCAGGTCCTTAGCGAGCGCTGCGACGCTGCAACCAAAGTGC
GGGTAGCGCTAGGTTGACGCCGTGGTTGTGGGACCCGATCGACGACCAACCAAAAGGGAATATTCATTGTGGGCTACAGTGGCGAGAGCGCAGGTCCTTAGCGAGCGCTGCGACGCTGCAACCAAAGTGC
GGGTAGCGCTAGGTTGACGCCGTGGTTGTGGGACCCGATCGACGACCGTAGAGAAGACATAGCAGATGGACAATCTGGCACACAGAGAGCGCAGGTCCTTAGCGAGCGCTGCGACGCTGCAACCAAAGTGC
GGGTAGCGCTAGGTTGACGCCGTGGTTGTGGGACCCGATCGACGACCGGACATGAAAGCAGAAATAAGCTTGTCTCGTGTTGGGGAGAGCGCAGGTCCTTAGCGAGCGCTGCGACGCTGCAACCAAAGTGC
GGGTAGCGCTAGGTTGACGCCGTGGTTGTGGGACCCGATCGACGACCCTAACGAGTGAGAAAATGCTCATGCTGCCTCATGGGAGAGCGCAGGTCCTTAGCGAGCGCTGCGACGCTGCAACCAAAGTGC
GGGTAGCGCTAGGTTGACGCCGTGGTTGTGGGACCCGATCGACGACCTTTTAAGGGTTAAGAAAACAGTGCACCCAAAGTGCCCGAGAGCGCAGGTCCTTAGCGAGCGCTGCGACGCTGCAACCAAAGTGC
GGGTAGCGCTAGGTTGACGCCGTGGTTGTGGGACCCGATCGACGACCAATCTGTATCATTACCCAGCTGGTGATTGGTCTGGTGAGAGCGCAGGTCCTTAGCGAGCGCTGCGACGCTGCAACCAAAGTGC
GGGTAGCGCTAGGTTGACGCCGTGGTTGTGGGACCCGATCGACGACCAAAACAACACGTTAGGCCATGCATTTAACCAAATGGCGAGAGCGCAGGTCCTTAGCGAGCGCTGCGACGCTGCAACCAAAGTGC
GGGTAGCGCTAGGTTGACGCCGTGGTTGTGGGACCCGATCGACGACCTGGAACGTGTCAGAATTTAGAAAGCACAGTTGTGGGGAGAGCGCAGGTCCTTAGCGAGCGCTGCGACGCTGCAACCAAAGTGC
GGGTAGCGCTAGGTTGACGCCGTGGTTGTGGGACCCGATCGACGACCAGCAAACATATGCCATGTTCCTCAAAGCAGTCTTCTGGAGAGCGCAGGTCCTTAGCGAGCGCTGCGACGCTGCAACCAAAGTGC
GGGTAGCGCTAGGTTGACGCCGTGGTTGTGGGACCCGATCGACGACCACATATGGATGAAAGGCTGGGACTCAACCATCCTGAGAGCGCAGGTCCTTAGCGAGCGCTGCGACGCTGCAACCAAAGTGC
GGGTAGCGCTAGGTTGACGCCGTGGTTGTGGGACCCGATCGACGACCAAGTTAATGACACTTGTGGCTGTCCATGTCTAACCCCGAGAGCGCAGGTCCTTAGCGAGCGCTGCGACGCTGCAACCAAAGTGC
GGGTAGCGCTAGGTTGACGCCGTGGTTGTGGGACCCGATCGACGACCTCTGTTTAAAGGATATGTGACCACATGGTTGGGAGCCGAGAGCGCAGGTCCTTAGCGAGCGCTGCGACGCTGCAACCAAAGTGC
GGGTAGCGCTAGGTTGACGCCGTGGTTGTGGGACCCGATCGACGACCTTCTATCCTGTCATAGAGGGTGAGATTGGGAACCAGCGAGAGCGCAGGTCCTTAGCGAGCGCTGCGACGCTGCAACCAAAGTGC
GGGTAGCGCTAGGTTGACGCCGTGGTTGTGGGACCCGATCGACGACCTTTTAGCATCCTTGGCAACGGGGTTCTGTTGGGAGAGCGCAGGTCCTTAGCGAGCGCTGCGACGCTGCAACCAAAGTGC
GGGTAGCGCTAGGTTGACGCCGTGGTTGTGGGACCCGATCGACGACCGGGGAAGAGTGGGCTCCCGAAGACACCAGGGAGAGCGCAGGTCCTTAGCGAGCGCTGCGACGCTGCAACCAAAGTGC
GGGTAGCGCTAGGTTGACGCCGTGGTTGTGGGACCCGATCGACGACCGCAACATCTCTCATCCTTAAAGGCTGCTGGGAGGAGAGCGCAGGTCCTTAGCGAGCGCTGCGACGCTGCAACCAAAGTGC
GGGTAGCGCTAGGTTGACGCCGTGGTTGTGGGACCCGATCGACGACCTCAGTAGGATGATCTGCCCTCTTATTTTGCAGGAGTGGAGAGCGCAGGTCCTTAGCGAGCGCTGCGACGCTGCAACCAAAGTGC
GGGTAGCGCTAGGTTGACGCCGTGGTTGTGGGACCCGATCGACGACCGGAAGAAGAGGGAGCTTGGAGAAGCTTTGAGCGAGAGCGCAGGTCCTTAGCGAGCGCTGCGACGCTGCAACCAAAGTGC
GGGTAGCGCTAGGTTGACGCCGTGGTTGTGGGACCCGATCGACGACCAGGTCCTGAATAGGCAAGTGAGGGGCTTGCGAGAGCGCAGGTCCTTAGCGAGCGCTGCGACGCTGCAACCAAAGTGC
GGGTAGCGCTAGGTTGACGCCGTGGTTGTGGGACCCGATCGACGACCCTTAACCCTACAGGATTCTCAGTCTCCACGTCTACCTGAGAGCGCAGGTCCTTAGCGAGCGCTGCGACGCTGCAACCAAAGTGC
GGGTAGCGCTAGGTTGACGCCGTGGTTGTGGGACCCGATCGACGACCCCCACAACATGTGCAAATGCTTACATTCATGGTGGGAGAGCGCAGGTCCTTAGCGAGCGCTGCGACGCTGCAACCAAAGTGC
GGGTAGCGCTAGGTTGACGCCGTGGTTGTGGGACCCGATCGACGACCGTTTCTCCCTCTCCCTTGGATCCCCAAAGCAGAGAGCGCAGGTCCTTAGCGAGCGCTGCGACGCTGCAACCAAAGTGC
GGGTAGCGCTAGGTTGACGCCGTGGTTGTGGGACCCGATCGACGACCGCAAGAGCTGGTGTGGAGCACTCCCCAGTCGAGAGCGCAGGTCCTTAGCGAGCGCTGCGACGCTGCAACCAAAGTGC
GGGTAGCGCTAGGTTGACGCCGTGGTTGTGGGACCCGATCGACGACCGGGGACGCAAGGAGAAGCCATCCTCACAGCGAGAGCGCAGGTCCTTAGCGAGCGCTGCGACGCTGCAACCAAAGTGC
GGGTAGCGCTAGGTTGACGCCGTGGTTGTGGGACCCGATCGACGACCAGTCTCTTCCTGAGAGATGCTAAGGCGGTGGGAGAGCGCAGGTCCTTAGCGAGCGCTGCGACGCTGCAACCAAAGTGC
GGGTAGCGCTAGGTTGACGCCGTGGTTGTGGGACCCGATCGACGACCAAGAGCACAGATTAGGACACACATTTACAGCCTGTGCGAGAGCGCAGGTCCTTAGCGAGCGCTGCGACGCTGCAACCAAAGTGC
GGGTAGCGCTAGGTTGACGCCGTGGTTGTGGGACCCGATCGACGACCACACACATTTACATACCTGGAAGGATGTTCCCGATGTGAGAGCGCAGGTCCTTAGCGAGCGCTGCGACGCTGCAACCAAAGTGC
GGGTAGCGCTAGGTTGACGCCGTGGTTGTGGGACCCGATCGACGACCTTAAAAGTTGTGGGAAAATCCCCACAAACTGCCATCAGAGAGCGCAGGTCCTTAGCGAGCGCTGCGACGCTGCAACCAAAGTGC
GGGTAGCGCTAGGTTGACGCCGTGGTTGTGGGACCCGATCGACGACCTTGGCTCACTTGGGAAAGTAGAGGTGGAAAGGCGAGAGCGCAGGTCCTTAGCGAGCGCTGCGACGCTGCAACCAAAGTGC
GGGTAGCGCTAGGTTGACGCCGTGGTTGTGGGACCCGATCGACGACCCGTTTCTGCGTTTGGCCAAATGAGATGCTAGACTGAGAGCGCAGGTCCTTAGCGAGCGCTGCGACGCTGCAACCAAAGTGC
GGGTAGCGCTAGGTTGACGCCGTGGTTGTGGGACCCGATCGACGACCAGAGTGCAGACCTCCACGTCGCTGCACTTTGAGAGCGCAGGTCCTTAGCGAGCGCTGCGACGCTGCAACCAAAGTGC
GGGTAGCGCTAGGTTGACGCCGTGGTTGTGGGACCCGATCGACGACCTTGAGATTTTCTGCTGCTACTCCAGCTTAGCCTGAGAGAGCGCAGGTCCTTAGCGAGCGCTGCGACGCTGCAACCAAAGTGC
GGGTAGCGCTAGGTTGACGCCGTGGTTGTGGGACCCGATCGACGACCTTTTGTTCCTACCCCTTCGTGTGCATCTGAACAATCCGAGAGCGCAGGTCCTTAGCGAGCGCTGCGACGCTGCAACCAAAGTGC
GGGTAGCGCTAGGTTGACGCCGTGGTTGTGGGACCCGATCGACGACCACAAGCCTCACGAACTCCTGTGGCTTCCCTGAGAGCGCAGGTCCTTAGCGAGCGCTGCGACGCTGCAACCAAAGTGC
GGGTAGCGCTAGGTTGACGCCGTGGTTGTGGGACCCGATCGACGACCCCCTTCGAGCTGTATCCACCATGACCTCTTGAGAGAGCGCAGGTCCTTAGCGAGCGCTGCGACGCTGCAACCAAAGTGC
GGGTAGCGCTAGGTTGACGCCGTGGTTGTGGGACCCGATCGACGACCGCCACTATCCTAGCACCCTCTGTCAAGAGCCGAGAGCGCAGGTCCTTAGCGAGCGCTGCGACGCTGCAACCAAAGTGC
GGGTAGCGCTAGGTTGACGCCGTGGTTGTGGGACCCGATCGACGACCACAGTCATCAGAACCATGGAGTGACTGACTGGGGAGAGCGCAGGTCCTTAGCGAGCGCTGCGACGCTGCAACCAAAGTGC
GGGTAGCGCTAGGTTGACGCCGTGGTTGTGGGACCCGATCGACGACCTGAGTGTGCTTTCGTCCTTCCATCTCCGGAGAGAGCGCAGGTCCTTAGCGAGCGCTGCGACGCTGCAACCAAAGTGC
GGGTAGCGCTAGGTTGACGCCGTGGTTGTGGGACCCGATCGACGACCAATGACGGGAGCTCTGAAACCATTTTGAAACCTGAACGAGAGCGCAGGTCCTTAGCGAGCGCTGCGACGCTGCAACCAAAGTGC
GGGTAGCGCTAGGTTGACGCCGTGGTTGTGGGACCCGATCGACGACCACTGGTATCTGTGGGCAGGTTAAAATGATCTGGTTCTGAGAGCGCAGGTCCTTAGCGAGCGCTGCGACGCTGCAACCAAAGTGC
GGGTAGCGCTAGGTTGACGCCGTGGTTGTGGGACCCGATCGACGACCTAAGTGCACTTGGAGAATCAAAGTCAGGAAGCACTGAGAGAGCGCAGGTCCTTAGCGAGCGCTGCGACGCTGCAACCAAAGTGC
GGGTAGCGCTAGGTTGACGCCGTGGTTGTGGGACCCGATCGACGACCGGTTCTTTGCAACACTCCATGCTACCCACTGGGAGAGCGCAGGTCCTTAGCGAGCGCTGCGACGCTGCAACCAAAGTGC
GGGTAGCGCTAGGTTGACGCCGTGGTTGTGGGACCCGATCGACGACCTACTCAAGCTCCTTCTGCTCTACCCTGAGCTAGGGAGAGCGCAGGTCCTTAGCGAGCGCTGCGACGCTGCAACCAAAGTGC
GGGTAGCGCTAGGTTGACGCCGTGGTTGTGGGACCCGATCGACGACCGAGAAGCAGCAAGAGACGGCCAGACAAAACAGAGAGCGCAGGTCCTTAGCGAGCGCTGCGACGCTGCAACCAAAGTGC
GGGTAGCGCTAGGTTGACGCCGTGGTTGTGGGACCCGATCGACGACCTCATTCAAGAGGGATCTACCAAAAGGGATCACCTCCTGAGAGCGCAGGTCCTTAGCGAGCGCTGCGACGCTGCAACCAAAGTGC
GGGTAGCGCTAGGTTGACGCCGTGGTTGTGGGACCCGATCGACGACCTGGGTTTAAGGTTTATACAGCAGCTCATGTGGGTTCAGAGAGCGCAGGTCCTTAGCGAGCGCTGCGACGCTGCAACCAAAGTGC
GGGTAGCGCTAGGTTGACGCCGTGGTTGTGGGACCCGATCGACGACCGGGATGCACAGGCATTTCCCAACGTGTCATGAGAGCGCAGGTCCTTAGCGAGCGCTGCGACGCTGCAACCAAAGTGC
GGGTAGCGCTAGGTTGACGCCGTGGTTGTGGGACCCGATCGACGACCCATCCCTGGTTCTGATAAAATCCAGAGTGGGGCCGAGAGCGCAGGTCCTTAGCGAGCGCTGCGACGCTGCAACCAAAGTGC
GGGTAGCGCTAGGTTGACGCCGTGGTTGTGGGACCCGATCGACGACCTGTAAATCAGAGGGCTTCACCCCTGAACCCAGAGAGCGCAGGTCCTTAGCGAGCGCTGCGACGCTGCAACCAAAGTGC
GGGTAGCGCTAGGTTGACGCCGTGGTTGTGGGACCCGATCGACGACCCAGCAGCACCACCAAGACACAGTGTCCCCAGAGAGCGCAGGTCCTTAGCGAGCGCTGCGACGCTGCAACCAAAGTGC
GGGTAGCGCTAGGTTGACGCCGTGGTTGTGGGACCCGATCGACGACCCTGTGCACAAGATTACAGCTTCTCTCTTGCTGCCGAGAGCGCAGGTCCTTAGCGAGCGCTGCGACGCTGCAACCAAAGTGC
GGGTAGCGCTAGGTTGACGCCGTGGTTGTGGGACCCGATCGACGACCAAAACTGTGCTTTTGCCCCTGGCATTTGAGAAGTGAGAGCGCAGGTCCTTAGCGAGCGCTGCGACGCTGCAACCAAAGTGC
GGGTAGCGCTAGGTTGACGCCGTGGTTGTGGGACCCGATCGACGACCATATTAAATTCAATCACCCAGCAACACTGGGGAGGCAGAGAGCGCAGGTCCTTAGCGAGCGCTGCGACGCTGCAACCAAAGTGC
GGGTAGCGCTAGGTTGACGCCGTGGTTGTGGGACCCGATCGACGACCATTTCTTTGCTGGCTGGCAAATGAATGTTTCTCAGCCGAGAGCGCAGGTCCTTAGCGAGCGCTGCGACGCTGCAACCAAAGTGC
GGGTAGCGCTAGGTTGACGCCGTGGTTGTGGGACCCGATCGACGACCCTTCTCATGTCTGGAGACACCAAGTAATGGGACAGCGAGAGCGCAGGTCCTTAGCGAGCGCTGCGACGCTGCAACCAAAGTGC
GGGTAGCGCTAGGTTGACGCCGTGGTTGTGGGACCCGATCGACGACCTCTTAAGCTGTCCCCATGGTTTGTGACCAAGACTGAGAGCGCAGGTCCTTAGCGAGCGCTGCGACGCTGCAACCAAAGTGC
GGGTAGCGCTAGGTTGACGCCGTGGTTGTGGGACCCGATCGACGACCGGGGCTACTTTGGCCTTCGTGGAAGTCCAGGAGAGCGCAGGTCCTTAGCGAGCGCTGCGACGCTGCAACCAAAGTGC
GGGTAGCGCTAGGTTGACGCCGTGGTTGTGGGACCCGATCGACGACCCACACTTCAACTGAGCTGCCAGTGGTGCCGGAGAGCGCAGGTCCTTAGCGAGCGCTGCGACGCTGCAACCAAAGTGC
GGGTAGCGCTAGGTTGACGCCGTGGTTGTGGGACCCGATCGACGACCAATCCTGGAAAATGCTGAGAGCCCTAAAAGTGGATCAGAGAGCGCAGGTCCTTAGCGAGCGCTGCGACGCTGCAACCAAAGTGC
GGGTAGCGCTAGGTTGACGCCGTGGTTGTGGGACCCGATCGACGACCCAGTCCTTGGCAAAGCCAGGGAGCAGGGTCGAGAGCGCAGGTCCTTAGCGAGCGCTGCGACGCTGCAACCAAAGTGC
GGGTAGCGCTAGGTTGACGCCGTGGTTGTGGGACCCGATCGACGACCCCCCAGATTCCAGCTCTTCCTAATGTTTCTCAGGAGAGAGCGCAGGTCCTTAGCGAGCGCTGCGACGCTGCAACCAAAGTGC
GGGTAGCGCTAGGTTGACGCCGTGGTTGTGGGACCCGATCGACGACCAAGAAGACTGCCCTGCTGCTGATGGCCCAGGAGAGCGCAGGTCCTTAGCGAGCGCTGCGACGCTGCAACCAAAGTGC
GGGTAGCGCTAGGTTGACGCCGACGCTGCAACCAAAGTGC
GGGTAGCGCTAGGTTGACGCGTCAATCGTCCGGGACGTCCTCCAAACACTTGTCTAGGAATGACATCCCCAGAAGAGATCAGGCCGCAGACGCCTAACCGGAAGCACCCTCCGACGCTGCAACCAAAGTGC
GGGTAGCGCTAGGTTGACGCGTCAATCGTCCGGGACGTCCTCCAAACATGGTACCACAGTGTGTTGATGGGGAAAGGCCGCAGACGCCTAACCGGAAGCACCCTCCGACGCTGCAACCAAAGTGC
GGGTAGCGCTAGGTTGACGCGTCAATCGTCCGGGACGTCCTCCAAACAATCAATCAAGAGAGGGTAGTTCCTAGGGAACAGCCTCGCAGACGCCTAACCGGAAGCACCCTCCGACGCTGCAACCAAAGTGC
GGGTAGCGCTAGGTTGACGCGTCAATCGTCCGGGACGTCCTCCAAACAATGACCCCAAGACTGAAACGAAGACCTAGGTGGCGCAGACGCCTAACCGGAAGCACCCTCCGACGCTGCAACCAAAGTGC
GGGTAGCGCTAGGTTGACGCGTCAATCGTCCGGGACGTCCTCCAAACGAGACATAATCCATGAAGACCTTGGTGAAGTCCCACCCGCAGACGCCTAACCGGAAGCACCCTCCGACGCTGCAACCAAAGTGC
GGGTAGCGCTAGGTTGACGCGTCAATCGTCCGGGACGTCCTCCAAACATACAAAAGGTGCCAAGTCCCAGAATTGTCAGAGTGCCGCAGACGCCTAACCGGAAGCACCCTCCGACGCTGCAACCAAAGTGC
GGGTAGCGCTAGGTTGACGCGTCAATCGTCCGGGACGTCCTCCAAACAGCAGGGGCACAATGAAAGCCTTGTGGGAACGCAGACGCCTAACCGGAAGCACCCTCCGACGCTGCAACCAAAGTGC
GGGTAGCGCTAGGTTGACGCGTCAATCGTCCGGGACGTCCTCCAAACTGAATTGGCTGGTGGCCTAGGATGTGCCATCGCAGACGCCTAACCGGAAGCACCCTCCGACGCTGCAACCAAAGTGC
GGGTAGCGCTAGGTTGACGCGTCAATCGTCCGGGACGTCCTCCAAACTTCCTGTTTTCCATGCTGTATGCCAATAGCACTGAGCCGCAGACGCCTAACCGGAAGCACCCTCCGACGCTGCAACCAAAGTGC
GGGTAGCGCTAGGTTGACGCGTCAATCGTCCGGGACGTCCTCCAAACTGGTGGAATTTGAACTGCATTTAGCCTTTCATTCGGCCGCAGACGCCTAACCGGAAGCACCCTCCGACGCTGCAACCAAAGTGC
GGGTAGCGCTAGGTTGACGCGTCAATCGTCCGGGACGTCCTCCAAACTTCTATGAACTTTCCTAGTTGTACGGCACCCTGAAGCCGCAGACGCCTAACCGGAAGCACCCTCCGACGCTGCAACCAAAGTGC
GGGTAGCGCTAGGTTGACGCGTCAATCGTCCGGGACGTCCTCCAAACCCATCATTTGATCTTGGTTGCTTGTGGTCTTAGTGGCCGCAGACGCCTAACCGGAAGCACCCTCCGACGCTGCAACCAAAGTGC
GGGTAGCGCTAGGTTGACGCGTCAATCGTCCGGGACGTCCTCCAAACTTGCTGTTATCTTGTAGTTACCCCTTGCACTCCATGACGCAGACGCCTAACCGGAAGCACCCTCCGACGCTGCAACCAAAGTGC
GGGTAGCGCTAGGTTGACGCGTCAATCGTCCGGGACGTCCTCCAAACAATTCTAGCATGCTGTCATGAAAAGGACACCCAGGACGCAGACGCCTAACCGGAAGCACCCTCCGACGCTGCAACCAAAGTGC
GGGTAGCGCTAGGTTGACGCGTCAATCGTCCGGGACGTCCTCCAAACCCCCACATCCCACTCCACACACAAATATTACACGCGCAGACGCCTAACCGGAAGCACCCTCCGACGCTGCAACCAAAGTGC
GGGTAGCGCTAGGTTGACGCGTCAATCGTCCGGGACGTCCTCCAAACATGTTCAGTGTAGACTACAAGGAGAAGGCACCTAGGACGCAGACGCCTAACCGGAAGCACCCTCCGACGCTGCAACCAAAGTGC
GGGTAGCGCTAGGTTGACGCGTCAATCGTCCGGGACGTCCTCCAAACTCGAAATTAGGAGAAGCAGCAGGCTAGTATCTCGAGCCGCAGACGCCTAACCGGAAGCACCCTCCGACGCTGCAACCAAAGTGC
GGGTAGCGCTAGGTTGACGCGTCAATCGTCCGGGACGTCCTCCAAACGGCTTGTAGGCTGGCTGGCCAGGGGAAACTACGCAGACGCCTAACCGGAAGCACCCTCCGACGCTGCAACCAAAGTGC
GGGTAGCGCTAGGTTGACGCGTCAATCGTCCGGGACGTCCTCCAAACCCAGTCCGCTTTGTGCAAGTGAATTCTCAAACCCCGCAGACGCCTAACCGGAAGCACCCTCCGACGCTGCAACCAAAGTGC
GGGTAGCGCTAGGTTGACGCGTCAATCGTCCGGGACGTCCTCCAAACATCAAAATGCTGAGGTCAACCAACAGGTCTCTTCAGGCGCAGACGCCTAACCGGAAGCACCCTCCGACGCTGCAACCAAAGTGC
GGGTAGCGCTAGGTTGACGCGTCAATCGTCCGGGACGTCCTCCAAACGGTGTTCATGGTGGTGACGGTTTTCTGGCTCGCAGACGCCTAACCGGAAGCACCCTCCGACGCTGCAACCAAAGTGC
GGGTAGCGCTAGGTTGACGCGTCAATCGTCCGGGACGTCCTCCAAACCTGCCCAAATTGGGATGCTACCTTCAGATCAGACCCGCAGACGCCTAACCGGAAGCACCCTCCGACGCTGCAACCAAAGTGC
GGGTAGCGCTAGGTTGACGCGTCAATCGTCCGGGACGTCCTCCAAACCTGCATAGGAGGGAAGAGACTCTTCCTGTGAAAGGCGCAGACGCCTAACCGGAAGCACCCTCCGACGCTGCAACCAAAGTGC
GGGTAGCGCTAGGTTGACGCGTCAATCGTCCGGGACGTCCTCCAAACGGCTTTCATGATTAGGCACAGCAGACTGCTGTCGCAGACGCCTAACCGGAAGCACCCTCCGACGCTGCAACCAAAGTGC
GGGTAGCGCTAGGTTGACGCGTCAATCGTCCGGGACGTCCTCCAAACGATCAAGGGGCTGCAGACACAGACTGCTCACGCAGACGCCTAACCGGAAGCACCCTCCGACGCTGCAACCAAAGTGC
GGGTAGCGCTAGGTTGACGCGTCAATCGTCCGGGACGTCCTCCAAACGCTTAAGGTACAGTTTGCAGGATTCATGAACACAGGGCGCAGACGCCTAACCGGAAGCACCCTCCGACGCTGCAACCAAAGTGC
GGGTAGCGCTAGGTTGACGCGTCAATCGTCCGGGACGTCCTCCAAACAGACCTCACTGTGATAAGAGCCCTGACTTCAGAATGCCGCAGACGCCTAACCGGAAGCACCCTCCGACGCTGCAACCAAAGTGC
GGGTAGCGCTAGGTTGACGCGTCAATCGTCCGGGACGTCCTCCAAACACAACATGGGATTCTTTCTCTGGGATGAGTGGAATGTCGCAGACGCCTAACCGGAAGCACCCTCCGACGCTGCAACCAAAGTGC
GGGTAGCGCTAGGTTGACGCGTCAATCGTCCGGGACGTCCTCCAAACACACTGAAGGTAAGAGACCAAAGAACCAGCCACACGCAGACGCCTAACCGGAAGCACCCTCCGACGCTGCAACCAAAGTGC
GGGTAGCGCTAGGTTGACGCGTCAATCGTCCGGGACGTCCTCCAAACAAAACAGGCATTCCTGTCAACTGTGTCTTCTACCTGGCGCAGACGCCTAACCGGAAGCACCCTCCGACGCTGCAACCAAAGTGC
GGGTAGCGCTAGGTTGACGCGTCAATCGTCCGGGACGTCCTCCAAACGAAACTTGGATGTGCAATGCATCCCACAGCAGCGCAGACGCCTAACCGGAAGCACCCTCCGACGCTGCAACCAAAGTGC
GGGTAGCGCTAGGTTGACGCGTCAATCGTCCGGGACGTCCTCCAAACGTGGGAAGTGCCAGAGAGGTTTTGTCCCTCCGCAGACGCCTAACCGGAAGCACCCTCCGACGCTGCAACCAAAGTGC
GGGTAGCGCTAGGTTGACGCGTCAATCGTCCGGGACGTCCTCCAAACACTCACACCAAAGGCACATGCTACTCTAGGAAGAGCGCAGACGCCTAACCGGAAGCACCCTCCGACGCTGCAACCAAAGTGC
GGGTAGCGCTAGGTTGACGCGTCAATCGTCCGGGACGTCCTCCAAACAAAACTAGCAGTGCCAGTGTTGCCACACAACTCGCAGACGCCTAACCGGAAGCACCCTCCGACGCTGCAACCAAAGTGC
GGGTAGCGCTAGGTTGACGCGTCAATCGTCCGGGACGTCCTCCAAACGCACTCTGGTTGAAGGAATGCTTCCCGGTGCGCAGACGCCTAACCGGAAGCACCCTCCGACGCTGCAACCAAAGTGC
GGGTAGCGCTAGGTTGACGCGTCAATCGTCCGGGACGTCCTCCAAACCCTTGAGCACTGCTTACTACGAGTGACCCCTCGCAGACGCCTAACCGGAAGCACCCTCCGACGCTGCAACCAAAGTGC
GGGTAGCGCTAGGTTGACGCGTCAATCGTCCGGGACGTCCTCCAAACACTGTTGTAAATGTGTCCACAGGTCCAGTAGGATGGCGCAGACGCCTAACCGGAAGCACCCTCCGACGCTGCAACCAAAGTGC
GGGTAGCGCTAGGTTGACGCGTCAATCGTCCGGGACGTCCTCCAAACACTGCCGTAATTCAGATTGCTTTGCTTGGAAAGAGGCGCAGACGCCTAACCGGAAGCACCCTCCGACGCTGCAACCAAAGTGC
GGGTAGCGCTAGGTTGACGCGTCAATCGTCCGGGACGTCCTCCAAACTTTTGAGTCTAGCTGCAGCGGCTGAAATTACAATGTGCGCAGACGCCTAACCGGAAGCACCCTCCGACGCTGCAACCAAAGTGC
GGGTAGCGCTAGGTTGACGCGTCAATCGTCCGGGACGTCCTCCAAACAAACTCAACAGAAGCTGATATGATCTGGACCAGAGGCCGCAGACGCCTAACCGGAAGCACCCTCCGACGCTGCAACCAAAGTGC
GGGTAGCGCTAGGTTGACGCGTCAATCGTCCGGGACGTCCTCCAAACTATGCTAAGCATACAGCAATGCCTCTGCCATATAGCACGCAGACGCCTAACCGGAAGCACCCTCCGACGCTGCAACCAAAGTGC
GGGTAGCGCTAGGTTGACGCGTCAATCGTCCGGGACGTCCTCCAAACTTAATGCACAAAAGTACCCTGCATGAAAATCACCCCACGCAGACGCCTAACCGGAAGCACCCTCCGACGCTGCAACCAAAGTGC
GGGTAGCGCTAGGTTGACGCGTCAATCGTCCGGGACGTCCTCCAAACACTAAATCCAAGTTATGGCCCCGAACCTCCACCCGCAGACGCCTAACCGGAAGCACCCTCCGACGCTGCAACCAAAGTGC
GGGTAGCGCTAGGTTGACGCGTCAATCGTCCGGGACGTCCTCCAAACTCTGCTGCAGCACATCCTCCTATGTGCTCCCGCAGACGCCTAACCGGAAGCACCCTCCGACGCTGCAACCAAAGTGC
GGGTAGCGCTAGGTTGACGCGTCAATCGTCCGGGACGTCCTCCAAACCTTTGCAGCACCAATCACAACTTGAGACTAGCCACGCAGACGCCTAACCGGAAGCACCCTCCGACGCTGCAACCAAAGTGC
GGGTAGCGCTAGGTTGACGCGTCAATCGTCCGGGACGTCCTCCAAACAACAAATAAAATGCAGGCATCGACTTACTGCCTCAGGCGCAGACGCCTAACCGGAAGCACCCTCCGACGCTGCAACCAAAGTGC
GGGTAGCGCTAGGTTGACGCGTCAATCGTCCGGGACGTCCTCCAAACTTGAGGAAAGGAGATAGTGGGTTATGAGTCGACAGCTCGCAGACGCCTAACCGGAAGCACCCTCCGACGCTGCAACCAAAGTGC
GGGTAGCGCTAGGTTGACGCGTCAATCGTCCGGGACGTCCTCCAAACACATGTGTCACGGTTCCTCAGAGAATTAACTGCCCCGCAGACGCCTAACCGGAAGCACCCTCCGACGCTGCAACCAAAGTGC
GGGTAGCGCTAGGTTGACGCGTCAATCGTCCGGGACGTCCTCCAAACAGACTGCATTCTCACGGAGAATGGCCTCAAATCCCGCAGACGCCTAACCGGAAGCACCCTCCGACGCTGCAACCAAAGTGC
GGGTAGCGCTAGGTTGACGCGTCAATCGTCCGGGACGTCCTCCAAACAATGGCTAAGATGGTTTCTACTGTGACCACAGCCTCGCAGACGCCTAACCGGAAGCACCCTCCGACGCTGCAACCAAAGTGC
GGGTAGCGCTAGGTTGACGCGTCAATCGTCCGGGACGTCCTCCAAACGAATTAAATTCCGAACTCAGCAATAGAGCTGCACCCCCGCAGACGCCTAACCGGAAGCACCCTCCGACGCTGCAACCAAAGTGC
GGGTAGCGCTAGGTTGACGCGTCAATCGTCCGGGACGTCCTCCAAACTGGTCTCACTCTTGCTTTATCAGTTCAACCAGTTGCACGCAGACGCCTAACCGGAAGCACCCTCCGACGCTGCAACCAAAGTGC
GGGTAGCGCTAGGTTGACGCGTCAATCGTCCGGGACGTCCTCCAAACTTAGGTGCTGCAAAATGCTTAGAATGTCACCAGAAGCCGCAGACGCCTAACCGGAAGCACCCTCCGACGCTGCAACCAAAGTGC
GGGTAGCGCTAGGTTGACGCGTCAATCGTCCGGGACGTCCTCCAAACGAGGATGTCCAAATACAGTGGTACTGGGAATTCCAGTCGCAGACGCCTAACCGGAAGCACCCTCCGACGCTGCAACCAAAGTGC
GGGTAGCGCTAGGTTGACGCGTCAATCGTCCGGGACGTCCTCCAAACATCTTAAGAGTGGCTCAAGAAAACGGACTTGCAAGGACGCAGACGCCTAACCGGAAGCACCCTCCGACGCTGCAACCAAAGTGC
GGGTAGCGCTAGGTTGACGCGTCAATCGTCCGGGACGTCCTCCAAACTTTTATGCCCTCAAGTCTCCCCTCTCCCTGCCACGGGAGTTGTGCGAAGGGTGCCCTCCGACGCTGCAACCAAAGTGC
GGGTAGCGCTAGGTTGACGCGTCAATCGTCCGGGACGTCCTCCAAACAGTGGGAATTAGGAACAGAAACGAACACAACAGTCCTCACGGGAGTTGTGCGAAGGGTGCCCTCCGACGCTGCAACCAAAGTGC
GGGTAGCGCTAGGTTGACGCGTCAATCGTCCGGGACGTCCTCCAAACGACAAATTCATCATTTGGCAATTGTTCTGGAGCAGGCCACGGGAGTTGTGCGAAGGGTGCCCTCCGACGCTGCAACCAAAGTGC
GGGTAGCGCTAGGTTGACGCGTCAATCGTCCGGGACGTCCTCCAAACATCCATCAAGTGCAAATCCATACCCTCAAAATGTGGCCACGGGAGTTGTGCGAAGGGTGCCCTCCGACGCTGCAACCAAAGTGC
GGGTAGCGCTAGGTTGACGCGTCAATCGTCCGGGACGTCCTCCAAACATAAATGGAAAGGAGGTGGATAGGACCAGTTGCTCACCACGGGAGTTGTGCGAAGGGTGCCCTCCGACGCTGCAACCAAAGTGC
GGGTAGCGCTAGGTTGACGCGTCAATCGTCCGGGACGTCCTCCAAACCTAGCTGACAACATGTGATCCAGTAACTACTTCCGGGCACGGGAGTTGTGCGAAGGGTGCCCTCCGACGCTGCAACCAAAGTGC
GGGTAGCGCTAGGTTGACGCGTCAATCGTCCGGGACGTCCTCCAAACATTATTCCCAAGGTTTGGGGCAGAGGAAACTTTCAGACACGGGAGTTGTGCGAAGGGTGCCCTCCGACGCTGCAACCAAAGTGC
GGGTAGCGCTAGGTTGACGCGTCAATCGTCCGGGACGTCCTCCAAACATTAAGTGCACACATTAAGCAAGTAGGCTGTGTGCCCACGGGAGTTGTGCGAAGGGTGCCCTCCGACGCTGCAACCAAAGTGC
GGGTAGCGCTAGGTTGACGCGTCAATCGTCCGGGACGTCCTCCAAACTCAGCTGTTCAGAACACAGACAGCATTTAACTCTGCACACGGGAGTTGTGCGAAGGGTGCCCTCCGACGCTGCAACCAAAGTGC
GGGTAGCGCTAGGTTGACGCGTCAATCGTCCGGGACGTCCTCCAAACGCAGCACTACCAATGCAGCATTCATTGCTCAATCCACGGGAGTTGTGCGAAGGGTGCCCTCCGACGCTGCAACCAAAGTGC
GGGTAGCGCTAGGTTGACGCGTCAATCGTCCGGGACGTCCTCCAAACATACTAACCTAAGCATTATCCCAGAGTACCGCCTCCACACGGGAGTTGTGCGAAGGGTGCCCTCCGACGCTGCAACCAAAGTGC
GGGTAGCGCTAGGTTGACGCGTCAATCGTCCGGGACGTCCTCCAAACGGAAACAGAATGGGCCATTTCCTTCTGTCTCCCCACGGGAGTTGTGCGAAGGGTGCCCTCCGACGCTGCAACCAAAGTGC
GGGTAGCGCTAGGTTGACGCGTCAATCGTCCGGGACGTCCTCCAAACATGTCAAGGTTCTGCGGAAAGCTTTCTAAAGCTCAGACACGGGAGTTGTGCGAAGGGTGCCCTCCGACGCTGCAACCAAAGTGC
GGGTAGCGCTAGGTTGACGCGTCAATCGTCCGGGACGTCCTCCAAACCCCCTTTCAAGAAGGGACTTGACCAATTGTGACTTGCACGGGAGTTGTGCGAAGGGTGCCCTCCGACGCTGCAACCAAAGTGC
GGGTAGCGCTAGGTTGACGCGTCAATCGTCCGGGACGTCCTCCAAACTTTTCCCACAACAACCTCAATAGTACGGACGGCACACGGGAGTTGTGCGAAGGGTGCCCTCCGACGCTGCAACCAAAGTGC
GGGTAGCGCTAGGTTGACGCGTCAATCGTCCGGGACGTCCTCCAAACTTTATAACTTCTGTCTGCTAAGCCCTCTCCCAACCACCACGGGAGTTGTGCGAAGGGTGCCCTCCGACGCTGCAACCAAAGTGC
GGGTAGCGCTAGGTTGACGCGTCAATCGTCCGGGACGTCCTCCAAACTTTGGCTGAAACATTATAGACACCAGGCCAGTTACCTCACGGGAGTTGTGCGAAGGGTGCCCTCCGACGCTGCAACCAAAGTGC
GGGTAGCGCTAGGTTGACGCGTCAATCGTCCGGGACGTCCTCCAAACTAAATCAATGTCTGCAGTCTTTCTAACGCTCAGGCCACACGGGAGTTGTGCGAAGGGTGCCCTCCGACGCTGCAACCAAAGTGC
GGGTAGCGCTAGGTTGACGCGTCAATCGTCCGGGACGTCCTCCAAACGGGGAGCTTGCTTTACCCCAGGGCATAAACCACGGGAGTTGTGCGAAGGGTGCCCTCCGACGCTGCAACCAAAGTGC
GGGTAGCGCTAGGTTGACGCGTCAATCGTCCGGGACGTCCTCCAAACTGCACAGCTTGTAAGACAACTGATGCTCACACTGCACGGGAGTTGTGCGAAGGGTGCCCTCCGACGCTGCAACCAAAGTGC
GGGTAGCGCTAGGTTGACGCGTCAATCGTCCGGGACGTCCTCCAAACATAGGCTTGAGGTGGGAGCAGGGAAGAAGGCACGGGAGTTGTGCGAAGGGTGCCCTCCGACGCTGCAACCAAAGTGC
GGGTAGCGCTAGGTTGACGCGTCAATCGTCCGGGACGTCCTCCAAACAAAGCGCGGAGTTACGTGTTGCCTAGCGAGCACGGGAGTTGTGCGAAGGGTGCCCTCCGACGCTGCAACCAAAGTGC
GGGTAGCGCTAGGTTGACGCGTCAATCGTCCGGGACGTCCTCCAAACTTGATGAGATGATGTGTTCGTATTTGGCCACAGGAGGCACGGGAGTTGTGCGAAGGGTGCCCTCCGACGCTGCAACCAAAGTGC
GGGTAGCGCTAGGTTGACGCGTCAATCGTCCGGGACGTCCTCCAAACGAGCCAGACCCTTTGGGAAGCAGCAACAACCACGGGAGTTGTGCGAAGGGTGCCCTCCGACGCTGCAACCAAAGTGC
GGGTAGCGCTAGGTTGACGCGTCAATCGTCCGGGACGTCCTCCAAACGAGCGGCGCCACACTGTCCCACCCACTTTACACGGGAGTTGTGCGAAGGGTGCCCTCCGACGCTGCAACCAAAGTGC
GGGTAGCGCTAGGTTGACGCGTCAATCGTCCGGGACGTCCTCCAAACGGGGTTCTGACCAGACACTCTGTACTGTATCAGGCCACGGGAGTTGTGCGAAGGGTGCCCTCCGACGCTGCAACCAAAGTGC
GGGTAGCGCTAGGTTGACGCGTCAATCGTCCGGGACGTCCTCCAAACTAAGCATAGAACAAAATTTCAGGCACCAGAACTGGCCCACGGGAGTTGTGCGAAGGGTGCCCTCCGACGCTGCAACCAAAGTGC
GGGTAGCGCTAGGTTGACGCGTCAATCGTCCGGGACGTCCTCCAAACACTCACACTCATAAAATGCCTCATGTACTCTGGGCTCACGGGAGTTGTGCGAAGGGTGCCCTCCGACGCTGCAACCAAAGTGC
GGGTAGCGCTAGGTTGACGCGTCAATCGTCCGGGACGTCCTCCAAACCCCCTCTAATGGCCCAGTGTTTAAGTCTCAGTGACACGGGAGTTGTGCGAAGGGTGCCCTCCGACGCTGCAACCAAAGTGC
GGGTAGCGCTAGGTTGACGCGTCAATCGTCCGGGACGTCCTCCAAACCCATGATGCCCAGGATGAAGAGCTCCTTTCCCACGGGAGTTGTGCGAAGGGTGCCCTCCGACGCTGCAACCAAAGTGC
GGGTAGCGCTAGGTTGACGCGTCAATCGTCCGGGACGTCCTCCAAACAACTGGCTTCCCAAGGATTGCAATAAGGCTCCCACGGGAGTTGTGCGAAGGGTGCCCTCCGACGCTGCAACCAAAGTGC
GGGTAGCGCTAGGTTGACGCGTCAATCGTCCGGGACGTCCTCCAAACCAACCCAACCTTTGTACCATCTGCAAGCTACAACTCACGGGAGTTGTGCGAAGGGTGCCCTCCGACGCTGCAACCAAAGTGC
GGGTAGCGCTAGGTTGACGCGTCAATCGTCCGGGACGTCCTCCAAACGCAGGAGGCTGGAGAAAGCATACTTGGACCCACGGGAGTTGTGCGAAGGGTGCCCTCCGACGCTGCAACCAAAGTGC
GGGTAGCGCTAGGTTGACGCGTCAATCGTCCGGGACGTCCTCCAAACCCAACCAAGGGCACAGAAAAGCTTCAATATTCCCCCACGGGAGTTGTGCGAAGGGTGCCCTCCGACGCTGCAACCAAAGTGC
GGGTAGCGCTAGGTTGACGCGTCAATCGTCCGGGACGTCCTCCAAACACAGAGGCAACTCGACTAACATTGCACAGATTCTGGCACGGGAGTTGTGCGAAGGGTGCCCTCCGACGCTGCAACCAAAGTGC
GGGTAGCGCTAGGTTGACGCGTCAATCGTCCGGGACGTCCTCCAAACATTCTCCACTGCTTGCTATGACAGTGACCATACTGAGCACGGGAGTTGTGCGAAGGGTGCCCTCCGACGCTGCAACCAAAGTGC
GGGTAGCGCTAGGTTGACGCGTCAATCGTCCGGGACGTCCTCCAAACAATGCTATTTCCCTGGTGATGACCTCTCCATTTGGACACGGGAGTTGTGCGAAGGGTGCCCTCCGACGCTGCAACCAAAGTGC
GGGTAGCGCTAGGTTGACGCGTCAATCGTCCGGGACGTCCTCCAAACTACAAAGCTCGTTTTACTCACCCTTTGGTGTGAGACACACGGGAGTTGTGCGAAGGGTGCCCTCCGACGCTGCAACCAAAGTGC
GGGTAGCGCTAGGTTGACGCGTCAATCGTCCGGGACGTCCTCCAAACACTTACACAGTGGCTCAATTTCTGCCTAAGGCTATGACACGGGAGTTGTGCGAAGGGTGCCCTCCGACGCTGCAACCAAAGTGC
GGGTAGCGCTAGGTTGACGCGTCAATCGTCCGGGACGTCCTCCAAACAAGTCCTCCACAAAGCGTATTTTCTTGCAGCCTCACGGGAGTTGTGCGAAGGGTGCCCTCCGACGCTGCAACCAAAGTGC
GGGTAGCGCTAGGTTGACGCGTCAATCGTCCGGGACGTCCTCCAAACAACGTCTTCCATGAAGAAGGACAGAAGCTGTTCTTGACACGGGAGTTGTGCGAAGGGTGCCCTCCGACGCTGCAACCAAAGTGC
GGGTAGCGCTAGGTTGACGCGTCAATCGTCCGGGACGTCCTCCAAACAGAGCCTAATACTTACTGGAATCGTTGCTTTGAGCCACACGGGAGTTGTGCGAAGGGTGCCCTCCGACGCTGCAACCAAAGTGC
GGGTAGCGCTAGGTTGACGCGTCAATCGTCCGGGACGTCCTCCAAACTGCTGCTTTGATATAGAGAGCGTCAACAGCTTGGGCACGGGAGTTGTGCGAAGGGTGCCCTCCGACGCTGCAACCAAAGTGC
GGGTAGCGCTAGGTTGACGCGTCAATCGTCCGGGACGTCCTCCAAACACAATGTTCCCCTTGGGTAACAACTTTTGGTGAAGGCACGGGAGTTGTGCGAAGGGTGCCCTCCGACGCTGCAACCAAAGTGC
GGGTAGCGCTAGGTTGACGCGTCAATCGTCCGGGACGTCCTCCAAACAAGATTGCTTGTGCTTGGCAATGGCAAGAGACACACGGGAGTTGTGCGAAGGGTGCCCTCCGACGCTGCAACCAAAGTGC
GGGTAGCGCTAGGTTGACGCGTCAATCGTCCGGGACGTCCTCCAAACTAACAGCAACCCACACCTCAAAATGAAATTCACCAGCCACGGGAGTTGTGCGAAGGGTGCCCTCCGACGCTGCAACCAAAGTGC
GGGTAGCGCTAGGTTGACGCGTCAATCGTCCGGGACGTCCTCCAAACATTTCCCTTCACCCCACTCAGCGTGTGTCACACGGGAGTTGTGCGAAGGGTGCCCTCCGACGCTGCAACCAAAGTGC
GGGTAGCGCTAGGTTGACGCGTCAATCGTCCGGGACGTCCTCCAAACCTCACAGCAGCCCAAGAGATACTAATGCCGGTCACGGGAGTTGTGCGAAGGGTGCCCTCCGACGCTGCAACCAAAGTGC
GGGTAGCGCTAGGTTGACGCGTCAATCGTCCGGGACGTCCTCCAAACGGATAACCTACTTAATGTAGCCCTCAAAGCCACCAGTCACGGGAGTTGTGCGAAGGGTGCCCTCCGACGCTGCAACCAAAGTGC
GGGTAGCGCTAGGTTGACGCGTCAATCGTCCGGGACGTCCTCCAAACAGCTCAGCCTTACTGGTAAGATTGCGTTCTCATTTCCCACGGGAGTTGTGCGAAGGGTGCCCTCCGACGCTGCAACCAAAGTGC
GGGTAGCGCTAGGTTGACGCGTCAATCGTCCGGGACGTCCTCCAAACAATTCAGAATTTCAGTTGCCTATCACAGCAGCTTGCACACGGGAGTTGTGCGAAGGGTGCCCTCCGACGCTGCAACCAAAGTGC
GGGTAGCGCTAGGTTGACGCGTCAATCGTCCGGGACGTCCTCCAAACGGGGTAGAAATGGGCAGCCCCAGGAAATCTCACGGGAGTTGTGCGAAGGGTGCCCTCCGACGCTGCAACCAAAGTGC
GGGTAGCGCTAGGTTGACGCGTCAATCGTCCGGGACGTCCTCCAAACTCACGATTCAAATGGGTCTTGTGTTTATTGCTTGCCACACGGGAGTTGTGCGAAGGGTGCCCTCCGACGCTGCAACCAAAGTGC
GGGTAGCGCTAGGTTGACGCGTCAATCGTCCGGGACGTCCTCCAAACCCCCAGAGGCCATTATTCTGCAGATAGCAGCCACGGGAGTTGTGCGAAGGGTGCCCTCCGACGCTGCAACCAAAGTGC
GGGTAGCGCTAGGTTGACGCGTCAATCGTCCGGGACGTCCTCCAAACCAAGATATGTTTGGAACTGGACCTGGGACTAAGGTCCCACGGGAGTTGTGCGAAGGGTGCCCTCCGACGCTGCAACCAAAGTGC
GGGTAGCGCTAGGTTGACGCGTCAATCGTCCGGGACGTCCTCCAAACAAAACCAGTGCTAGGTATGAGGGAGCCACCACACGGGAGTTGTGCGAAGGGTGCCCTCCGACGCTGCAACCAAAGTGC
GGGTAGCGCTAGGTTGACGCGTCAATCGTCCGGGACGTCCTCCAAACAAACTCCCATCCTCATTTCTGTCCCAGTTCTTCCTCACGGGAGTTGTGCGAAGGGTGCCCTCCGACGCTGCAACCAAAGTGC
GGGTAGCGCTAGGTTGACGCGTCAATCGTCCGGGACGTCCTCCAAACAGACAGTAAATATGGCTCATTCTGGGTAGCAGCCCCACGGGAGTTGTGCGAAGGGTGCCCTCCGACGCTGCAACCAAAGTGC
GGGTAGCGCTAGGTTGACGCGTCAATCGTCCGGGACGTCCTCCAAACTAAGAAGAGGGCAGCCCAGAGTCATATTCTGAGAAGCCACGGGAGTTGTGCGAAGGGTGCCCTCCGACGCTGCAACCAAAGTGC
GGGTAGCGCTAGGTTGACGCGTCAATCGTCCGGGACGTCCTCCAAACAACCCAAGACTAAATTCCAAATGAAAGCAAGCAGGGCCACGGGAGTTGTGCGAAGGGTGCCCTCCGACGCTGCAACCAAAGTGC
GGGTAGCGCTAGGTTGACGCGTCAATCGTCCGGGACGTCCTCCAAACTGCTTGGACTGATGTCTGCTGTTTCAAAACATGAGTGCACGGGAGTTGTGCGAAGGGTGCCCTCCGACGCTGCAACCAAAGTGC
GGGTAGCGCTAGGTTGACGCGTCAATCGTCCGGGACGTCCTCCAAACGATCTCTTGGAAGAATCCAAGCCTTATTTCCCCAGGACACGGGAGTTGTGCGAAGGGTGCCCTCCGACGCTGCAACCAAAGTGC
GGGTAGCGCTAGGTTGACGCGTCAATCGTCCGGGACGTCCTCCAAACAAAACTATAGCAGAAGTCAGCTGACTGGGAGTGCTCACGGGAGTTGTGCGAAGGGTGCCCTCCGACGCTGCAACCAAAGTGC
GGGTAGCGCTAGGTTGACGCGTCAATCGTCCGGGACGTCCTCCAAACAAGAAAGAAGTCGTTTCAGTTGGGAGTGGCTGAAAGGCACGGGAGTTGTGCGAAGGGTGCCCTCCGACGCTGCAACCAAAGTGC
GGGTAGCGCTAGGTTGACGCGTCAATCGTCCGGGACGTCCTCCAAACAGTTCCTTTGGAAAGAAACAGTGTGAACTTGGAGGGACACGGGAGTTGTGCGAAGGGTGCCCTCCGACGCTGCAACCAAAGTGC
GGGTAGCGCTAGGTTGACGCGTCAATCGTCCGGGACGTCCTCCAAACTCAAAAGCTCAAATGCCCTTAGAGGGCGAGGCACGGGAGTTGTGCGAAGGGTGCCCTCCGACGCTGCAACCAAAGTGC
GGGTAGCGCTAGGTTGACGCGTCAATCGTCCGGGACGTCCTCCAAACACAAACACACTGGGTGGGTAGATACCAGATAATTGCGCACGGGAGTTGTGCGAAGGGTGCCCTCCGACGCTGCAACCAAAGTGC
GGGTAGCGCTAGGTTGACGCGTCAATCGTCCGGGACGTCCTCCAAACAGCCTGTTAACACACTGTGCTATAAACACAGAGTGCACACGGGAGTTGTGCGAAGGGTGCCCTCCGACGCTGCAACCAAAGTGC
GGGTAGCGCTAGGTTGACGCGTCAATCGTCCGGGACGTCCTCCAAACAAAGGATGACACAAAACACCTCCCAGAGCCATATACTCACGGGAGTTGTGCGAAGGGTGCCCTCCGACGCTGCAACCAAAGTGC
GGGTAGCGCTAGGTTGACGCGTCAATCGTCCGGGACGTCCTCCAAACGCCGTGAGCAGCCAATTTCAGATCCCTGGTCACGGGAGTTGTGCGAAGGGTGCCCTCCGACGCTGCAACCAAAGTGC
GGGTAGCGCTAGGTTGACGCGTCAATCGTCCGGGACGTCCTCCAAACATATAGTCCTAGAATGCCTCTGCTTTGGTTTGCAGCCCACGGGAGTTGTGCGAAGGGTGCCCTCCGACGCTGCAACCAAAGTGC
GGGTAGCGCTAGGTTGACGCGTCAATCGTCCGGGACGTCCTCCAAACACTGTGGCCATTTCTGTATGAATGACCATATCACCCACACGGGAGTTGTGCGAAGGGTGCCCTCCGACGCTGCAACCAAAGTGC
GGGTAGCGCTAGGTTGACGCGTCAATCGTCCGGGACGTCCTCCAAACCTGGATCACAGTCATCCTCCATCTTAGTCAGCAAACCCACGGGAGTTGTGCGAAGGGTGCCCTCCGACGCTGCAACCAAAGTGC
GGGTAGCGCTAGGTTGACGCGTCAATCGTCCGGGACGTCCTCCAAACTGCCTCATTAGGGTCCTTTGATAAGCAGGAAGATCTGCACGGGAGTTGTGCGAAGGGTGCCCTCCGACGCTGCAACCAAAGTGC
GGGTAGCGCTAGGTTGACGCGTCAATCGTCCGGGACGTCCTCCAAACAAAGTTTAAGTCCTCTCCCACCCAAAAGAATGCCAGCCACGGGAGTTGTGCGAAGGGTGCCCTCCGACGCTGCAACCAAAGTGC
GGGTAGCGCTAGGTTGACGCGTCAATCGTCCGGGACGTCCTCCAAACTGCCCTCTCTGATGGCCCAGTGTAGCCCATCACGGGAGTTGTGCGAAGGGTGCCCTCCGACGCTGCAACCAAAGTGC
GGGTAGCGCTAGGTTGACGCGTCAATCGTCCGGGACGTCCTCCAAACGAGCAAACTCAGCTCACCAACTCCTGTGCACACGGGAGTTGTGCGAAGGGTGCCCTCCGACGCTGCAACCAAAGTGC
GGGTAGCGCTAGGTTGACGCGTCAATCGTCCGGGACGTCCTCCAAACGAATCTTAGCTCACTTCGAGTCTTCAGTGACACCGCCACGGGAGTTGTGCGAAGGGTGCCCTCCGACGCTGCAACCAAAGTGC
GGGTAGCGCTAGGTTGACGCGTCAATCGTCCGGGACGTCCTCCAAACTGTTTGATGCAAAGATACTGTGGTTTTGCCTCTCCAGCACGGGAGTTGTGCGAAGGGTGCCCTCCGACGCTGCAACCAAAGTGC
GGGTAGCGCTAGGTTGACGCGTCAATCGTCCGGGACGTCCTCCAAACAAAAGATAGGCCCCACTACATTGGACAATGGTAAGCCCACGGGAGTTGTGCGAAGGGTGCCCTCCGACGCTGCAACCAAAGTGC
GGGTAGCGCTAGGTTGACGCGTCAATCGTCCGGGACGTCCTCCAAACGGAATGAGGAGTGTTGTAAATGGACTGGAGAGGAAGGCACGGGAGTTGTGCGAAGGGTGCCCTCCGACGCTGCAACCAAAGTGC
GGGTAGCGCTAGGTTGACGCGTCAATCGTCCGGGACGTCCTCCAAACAAAGGAGACGTGGAAGCTGGATAAGCAGAAGGGCACGGGAGTTGTGCGAAGGGTGCCCTCCGACGCTGCAACCAAAGTGC
GGGTAGCGCTAGGTTGACGCGTCAATCGTCCGGGACGTCCTCCAAACTATGATGGGGAGGAGCACATGAACATTCCCTGACACGGGAGTTGTGCGAAGGGTGCCCTCCGACGCTGCAACCAAAGTGC
GGGTAGCGCTAGGTTGACGCGTCAATCGTCCGGGACGTCCTCCAAACGAGCCTCCACCTGTGTGTCCTGGCCCTTGGCACGGGAGTTGTGCGAAGGGTGCCCTCCGACGCTGCAACCAAAGTGC
GGGTAGCGCTAGGTTGACGCGTCAATCGTCCGGGACGTCCTCCAAACCTAGCTGACTTGTACTCTGCAGGTTTGCACATGTCACACGGGAGTTGTGCGAAGGGTGCCCTCCGACGCTGCAACCAAAGTGC
GGGTAGCGCTAGGTTGACGCGTCAATCGTCCGGGACGTCCTCCAAACACATGCTTAAGAAGCAGAGACTCATACCTCATCCAGCCACGGGAGTTGTGCGAAGGGTGCCCTCCGACGCTGCAACCAAAGTGC
GGGTAGCGCTAGGTTGACGCGTCAATCGTCCGGGACGTCCTCCAAACACCACATTAGAGCAGTTCCCAAGGAATGTCTGAAGCCACGGGAGTTGTGCGAAGGGTGCCCTCCGACGCTGCAACCAAAGTGC
GGGTAGCGCTAGGTTGACGCGTCAATCGTCCGGGACGTCCTCCAAACAAAATAAGTCAGCAGATTGCCCATCATCGCTCACACCACGGGAGTTGTGCGAAGGGTGCCCTCCGACGCTGCAACCAAAGTGC
GGGTAGCGCTAGGTTGACGCGTCAATCGTCCGGGACGTCCTCCAAACATAGCTTCCCTGCTGTTTTCATCTTCACTCTTAGCCCCACGGGAGTTGTGCGAAGGGTGCCCTCCGACGCTGCAACCAAAGTGC
GGGTAGCGCTAGGTTGACGCGTCAATCGTCCGGGACGTCCTCCAAACAAAAGGAGAAAAGAACGCACAGTGCACAAAGCCTCACGGGAGTTGTGCGAAGGGTGCCCTCCGACGCTGCAACCAAAGTGC
GGGTAGCGCTAGGTTGACGCGTCAATCGTCCGGGACGTCCTCCAAACAACACATTAATTGTTGCTTCAGCTCTTTGACCCGTGTCACGGGAGTTGTGCGAAGGGTGCCCTCCGACGCTGCAACCAAAGTGC
GGGTAGCGCTAGGTTGACGCGTCAATCGTCCGGGACGTCCTCCAAACCCCTGAGGCAGTCAACGTGAGCATGTGATAGCACGGGAGTTGTGCGAAGGGTGCCCTCCGACGCTGCAACCAAAGTGC
GGGTAGCGCTAGGTTGACGCGTCAATCGTCCGGGACGTCCTCCAAACACTCTGCTTGGGCTGAGCAATGAATTTGAGCCCACGGGAGTTGTGCGAAGGGTGCCCTCCGACGCTGCAACCAAAGTGC
GGGTAGCGCTAGGTTGACGCGTCAATCGTCCGGGACGTCCTCCAAACTGAACTTTCAGGGCACCAGGAATGCGATTTCTCACGGGAGTTGTGCGAAGGGTGCCCTCCGACGCTGCAACCAAAGTGC
GGGTAGCGCTAGGTTGACGCGTCAATCGTCCGGGACGTCCTCCAAACTGCCTATTATAGGCCAAAGGAGGCATGGGGCCACGGGAGTTGTGCGAAGGGTGCCCTCCGACGCTGCAACCAAAGTGC
GGGTAGCGCTAGGTTGACGCGTCAATCGTCCGGGACGTCCTCCAAACATCGGGTTACCGGAGACACCTCCCTACCATCACGGGAGTTGTGCGAAGGGTGCCCTCCGACGCTGCAACCAAAGTGC
GGGTAGCGCTAGGTTGACGCGTCAATCGTCCGGGACGTCCTCCAAACACCACAGAATGCCCTGTGGGACAAAATAGACTATAGGCACGGGAGTTGTGCGAAGGGTGCCCTCCGACGCTGCAACCAAAGTGC
GGGTAGCGCTAGGTTGACGCGTCAATCGTCCGGGACGTCCTCCAAACGGGGACATTTGGCATAAAATGATGAGCTCTGCTTTCGCACGGGAGTTGTGCGAAGGGTGCCCTCCGACGCTGCAACCAAAGTGC
GGGTAGCGCTAGGTTGACGCGTCAATCGTCCGGGACGTCCTCCAAACGAGGGCTTCTCTGGAAGCTTCTTCTTGATCCTCTCACGGGAGTTGTGCGAAGGGTGCCCTCCGACGCTGCAACCAAAGTGC
GGGTAGCGCTAGGTTGACGCGTCAATCGTCCGGGACGTCCTCCAAACATCCCCTCCCCTGCCTTCATCATTGTTTCCTCACGGGAGTTGTGCGAAGGGTGCCCTCCGACGCTGCAACCAAAGTGC
GGGTAGCGCTAGGTTGACGCGTCAATCGTCCGGGACGTCCTCCAAACGTCTCTCCTCTGCATTTCAAACCAAAGCAGAGGGCACGGGAGTTGTGCGAAGGGTGCCCTCCGACGCTGCAACCAAAGTGC
GGGTAGCGCTAGGTTGACGCGTCAATCGTCCGGGACGTCCTCCAAACTAGGAGGGCAGATGAGCTGAGTGTCTGGGTCACGGGAGTTGTGCGAAGGGTGCCCTCCGACGCTGCAACCAAAGTGC
GGGTAGCGCTAGGTTGACGCGTCAATCGTCCGGGACGTCCTCCAAACTAGATAGGAGCCTCTAGTGCAGCCCTGTGTTGCACGGGAGTTGTGCGAAGGGTGCCCTCCGACGCTGCAACCAAAGTGC
GGGTAGCGCTAGGTTGACGCGTCAATCGTCCGGGACGTCCTCCAAACAACTTCCTACACACCATCTGTTCCCTTTACTGCAGTCACGGGAGTTGTGCGAAGGGTGCCCTCCGACGCTGCAACCAAAGTGC
GGGTAGCGCTAGGTTGACGCGTCAATCGTCCGGGACGTCCTCCAAACTCTTTGTATTACAGGCCTAGGTGCTCTCTGATGGTGGCACGGGAGTTGTGCGAAGGGTGCCCTCCGACGCTGCAACCAAAGTGC
GGGTAGCGCTAGGTTGACGCGTCAATCGTCCGGGACGTCCTCCAAACAAGAGGTGTCCAGTTCTTCTAGCAAACTTGTCAGTGCCACGGGAGTTGTGCGAAGGGTGCCCTCCGACGCTGCAACCAAAGTGC
GGGTAGCGCTAGGTTGACGCGTCAATCGTCCGGGACGTCCTCCAAACTCATGTCTTCCATGGGTTGTGCCCTGAATCAATGCACGGGAGTTGTGCGAAGGGTGCCCTCCGACGCTGCAACCAAAGTGC
GGGTAGCGCTAGGTTGACGCGTCAATCGTCCGGGACGTCCTCCAAACTAGGTGCCAAGAGATATCTTGTCTATGCCCCTTACCCCACGGGAGTTGTGCGAAGGGTGCCCTCCGACGCTGCAACCAAAGTGC
GGGTAGCGCTAGGTTGACGCGTCAATCGTCCGGGACGTCCTCCAAACTGGAGCAAGACAGACCAAGAGAATCTGAGATGGTTCCACGGGAGTTGTGCGAAGGGTGCCCTCCGACGCTGCAACCAAAGTGC
GGGTAGCGCTAGGTTGACGCGTCAATCGTCCGGGACGTCCTCCAAACTGTTAACTCTGGGTCACACCCAGTGCTGAATTTATCTCACGGGAGTTGTGCGAAGGGTGCCCTCCGACGCTGCAACCAAAGTGC
GGGTAGCGCTAGGTTGACGCGTCAATCGTCCGGGACGTCCTCCAAACTCATGGAATTTTGTTTGGGTGTCAGTGTGTGTAGTGCCACGGGAGTTGTGCGAAGGGTGCCCTCCGACGCTGCAACCAAAGTGC
GGGTAGCGCTAGGTTGACGCGTCAATCGTCCGGGACGTCCTCCAAACACCAAACAGATTATGAGGGGATTTCTGCCTATAGGGCCACGGGAGTTGTGCGAAGGGTGCCCTCCGACGCTGCAACCAAAGTGC
GGGTAGCGCTAGGTTGACGCGTCAATCGTCCGGGACGTCCTCCAAACAGGTCCATTTGGAGGGAGGGCAAATCAGCACACGGGAGTTGTGCGAAGGGTGCCCTCCGACGCTGCAACCAAAGTGC
GGGTAGCGCTAGGTTGACGCGTCAATCGTCCGGGACGTCCTCCAAACGAGAGGGAGAGGAGCTTGGTCGCGGTGCACCACGGGAGTTGTGCGAAGGGTGCCCTCCGACGCTGCAACCAAAGTGC
GGGTAGCGCTAGGTTGACGCGTCAATCGTCCGGGACGTCCTCCAAACTTAAGGACAAGGAATTTTCCATGCAAAGGTTCTGGGGCACGGGAGTTGTGCGAAGGGTGCCCTCCGACGCTGCAACCAAAGTGC
GGGTAGCGCTAGGTTGACGCGTCAATCGTCCGGGACGTCCTCCAAACCAGTGAAGAGCAGATCACATGCACTCTGTAGACAAGCCACGGGAGTTGTGCGAAGGGTGCCCTCCGACGCTGCAACCAAAGTGC
GGGTAGCGCTAGGTTGACGCGTCAATCGTCCGGGACGTCCTCCAAACCCCATTGGAACAACCTTCTGAAGATGAAAGCCTGGCACGGGAGTTGTGCGAAGGGTGCCCTCCGACGCTGCAACCAAAGTGC
GGGTAGCGCTAGGTTGACGCGTCAATCGTCCGGGACGTCCTCCAAACAGAGTTTGGCAAAACCATGGGAAGAAAGCTCAAGATGCACGGGAGTTGTGCGAAGGGTGCCCTCCGACGCTGCAACCAAAGTGC
GGGTAGCGCTAGGTTGACGCGTCAATCGTCCGGGACGTCCTCCAAACATTCAACCATGGCTTTAAACCGCAGGGTTCCTCACGGGAGTTGTGCGAAGGGTGCCCTCCGACGCTGCAACCAAAGTGC
GGGTAGCGCTAGGTTGACGCGTCAATCGTCCGGGACGTCCTCCAAACAAAAGCAATCCAACTAGGCTGTAGTTGGGTCTCCTCACGGGAGTTGTGCGAAGGGTGCCCTCCGACGCTGCAACCAAAGTGC
GGGTAGCGCTAGGTTGACGCGTCAATCGTCCGGGACGTCCTCCAAACACAGTTTGAGTGTTCCCTTTGAGGGAACACCTCTCACGGGAGTTGTGCGAAGGGTGCCCTCCGACGCTGCAACCAAAGTGC
GGGTAGCGCTAGGTTGACGCGTCAATCGTCCGGGACGTCCTCCAAACTTTTGAATGGATTTTACTCCACACCATCAGTGGCACCCACGGGAGTTGTGCGAAGGGTGCCCTCCGACGCTGCAACCAAAGTGC
GGGTAGCGCTAGGTTGACGCGTCAATCGTCCGGGACGTCCTCCAAACAGCTTTCGTATCATTCCTGTGAGCACCTGGTGGCACGGGAGTTGTGCGAAGGGTGCCCTCCGACGCTGCAACCAAAGTGC
GGGTAGCGCTAGGTTGACGCGTCAATCGTCCGGGACGTCCTCCAAACAGTACACAGCGTTGATGGAATTGTCATATCAGCCTGTCACGGGAGTTGTGCGAAGGGTGCCCTCCGACGCTGCAACCAAAGTGC
GGGTAGCGCTAGGTTGACGCGTCAATCGTCCGGGACGTCCTCCAAACAGCAGGTTAGGGGCTGAGGCCCGGTATGAGCACGGGAGTTGTGCGAAGGGTGCCCTCCGACGCTGCAACCAAAGTGC
GGGTAGCGCTAGGTTGACGCGTCAATCGTCCGGGACGTCCTCCAAACCCCAAATCCTGTTAGTCCACCAAGCTCCCTTTGCACGGGAGTTGTGCGAAGGGTGCCCTCCGACGCTGCAACCAAAGTGC
GGGTAGCGCTAGGTTGACGCGTCAATCGTCCGGGACGTCCTCCAAACCATAAGTCCCATCAAGAACTGCGTTTCCAGGGACTCACGGGAGTTGTGCGAAGGGTGCCCTCCGACGCTGCAACCAAAGTGC
GGGTAGCGCTAGGTTGACGCGTCAATCGTCCGGGACGTCCTCCAAACAAGAGAATTAATGTTACCAGCTACTGGCCGTTTCCCACACGGGAGTTGTGCGAAGGGTGCCCTCCGACGCTGCAACCAAAGTGC
GGGTAGCGCTAGGTTGACGCGTCAATCGTCCGGGACGTCCTCCAAACCTGCATTGCCCACACAAGCTGTGCTCTAGCCACGGGAGTTGTGCGAAGGGTGCCCTCCGACGCTGCAACCAAAGTGC
GGGTAGCGCTAGGTTGACGCGTCAATCGTCCGGGACGTCCTCCAAACACGGACTTGTGGCCCTCGCCTGAGCACTCTACACGGGAGTTGTGCGAAGGGTGCCCTCCGACGCTGCAACCAAAGTGC
GGGTAGCGCTAGGTTGACGCGTCAATCGTCCGGGACGTCCTCCAAACTCCACTTTCACATCCCCAACTCTTTGCTCATCTGGCACGGGAGTTGTGCGAAGGGTGCCCTCCGACGCTGCAACCAAAGTGC
GGGTAGCGCTAGGTTGACGCGTCAATCGTCCGGGACGTCCTCCAAACGTCCTTGGGTCCAGAAAGCCATTCAATCCTTTGTCACGGGAGTTGTGCGAAGGGTGCCCTCCGACGCTGCAACCAAAGTGC
GGGTAGCGCTAGGTTGACGCGTCAATCGTCCGGGACGTCCTCCAAACAGGCTTTCACTGAGACAAGCAGCAATGTAAGAGTTCTCACGGGAGTTGTGCGAAGGGTGCCCTCCGACGCTGCAACCAAAGTGC
GGGTAGCGCTAGGTTGACGCGTCAATCGTCCGGGACGTCCTCCAAACAAATAGCATCTGTGGCGATGGCAAGATGAAAATGTCACACGGGAGTTGTGCGAAGGGTGCCCTCCGACGCTGCAACCAAAGTGC
GGGTAGCGCTAGGTTGACGCGTCAATCGTCCGGGACGTCCTCCAAACCAGATGAAAGAACAGCTCACAAAAGCACCTCACAGCCACGGGAGTTGTGCGAAGGGTGCCCTCCGACGCTGCAACCAAAGTGC
GGGTAGCGCTAGGTTGACGCGTCAATCGTCCGGGACGTCCTCCAAACAAAAGAAACAGTGCCTACTGGTAAGGACTCAGCTGGCACGGGAGTTGTGCGAAGGGTGCCCTCCGACGCTGCAACCAAAGTGC
GGGTAGCGCTAGGTTGACGCGTCAATCGTCCGGGACGTCCTCCAAACTTCAAGATGCAGAGAATGAACCCAGATGGTTAAGCCCCACGGGAGTTGTGCGAAGGGTGCCCTCCGACGCTGCAACCAAAGTGC
GGGTAGCGCTAGGTTGACGCGTCAATCGTCCGGGACGTCCTCCAAACTGAAGGGACTGTGACTAATAGAAACACGTTGGGTCACCACGGGAGTTGTGCGAAGGGTGCCCTCCGACGCTGCAACCAAAGTGC
GGGTAGCGCTAGGTTGACGCGTCAATCGTCCGGGACGTCCTCCAAACAGTAGCTGTAACAAGAAAAGAGGAGGAAGATGGGCCCACGGGAGTTGTGCGAAGGGTGCCCTCCGACGCTGCAACCAAAGTGC
GGGTAGCGCTAGGTTGACGCGTCAATCGTCCGGGACGTCCTCCAAACAAACAAAGATTCCTATGAATGCCCTTGGATGCTGCACACGGGAGTTGTGCGAAGGGTGCCCTCCGACGCTGCAACCAAAGTGC
GGGTAGCGCTAGGTTGACGCGTCAATCGTCCGGGACGTCCTCCAAACGAGAGGGAAGAGCAAACACAGAAAGGAGCAAGGCACGGGAGTTGTGCGAAGGGTGCCCTCCGACGCTGCAACCAAAGTGC
GGGTAGCGCTAGGTTGACGCGTCAATCGTCCGGGACGTCCTCCAAACGCACTCCTGGGACTGAGGGGCAGAAGGGAACACGGGAGTTGTGCGAAGGGTGCCCTCCGACGCTGCAACCAAAGTGC
GGGTAGCGCTAGGTTGACGCGTCAATCGTCCGGGACGTCCTCCAAACTTTTAGGCTCCTGTAGGCGATAGTGCACATTGGCCACGGGAGTTGTGCGAAGGGTGCCCTCCGACGCTGCAACCAAAGTGC
GGGTAGCGCTAGGTTGACGCGTCAATCGTCCGGGACGTCCTCCAAACTCAGCACCTCTACTTCTTTGTGGAGAAAACTGTTGGACACGGGAGTTGTGCGAAGGGTGCCCTCCGACGCTGCAACCAAAGTGC
GGGTAGCGCTAGGTTGACGCGTCAATCGTCCGGGACGTCCTCCAAACATGATTTCACCTAAATTCCCAGACTCCATCCTGCTGCCACGGGAGTTGTGCGAAGGGTGCCCTCCGACGCTGCAACCAAAGTGC
GGGTAGCGCTAGGTTGACGCGTCAATCGTCCGGGACGTCCTCCAAACGTGGGAGTTGGGGAGGGGCGGGAAATGGAACACGGGAGTTGTGCGAAGGGTGCCCTCCGACGCTGCAACCAAAGTGC
GGGTAGCGCTAGGTTGACGCGTCAATCGTCCGGGACGTCCTCCAAACAAAATCCAGTGAATCTCCTCGGTTCAGGCAGAAGACACGGGAGTTGTGCGAAGGGTGCCCTCCGACGCTGCAACCAAAGTGC
GGGTAGCGCTAGGTTGACGCGTCAATCGTCCGGGACGTCCTCCAAACTAAATTCACTGAGGCTGTGTTTGCCTCCGAGACACACGGGAGTTGTGCGAAGGGTGCCCTCCGACGCTGCAACCAAAGTGC
GGGTAGCGCTAGGTTGACGCGTCAATCGTCCGGGACGTCCTCCAAACTTCATACATAACTCCTATTTCCCAGGCAACCCATGCTCACGGGAGTTGTGCGAAGGGTGCCCTCCGACGCTGCAACCAAAGTGC
GGGTAGCGCTAGGTTGACGCGTCAATCGTCCGGGACGTCCTCCAAACAGTGTCACAGTAAGAGTCACAAGCCAGATTTCTCTGGCACGGGAGTTGTGCGAAGGGTGCCCTCCGACGCTGCAACCAAAGTGC
GGGTAGCGCTAGGTTGACGCGTCAATCGTCCGGGACGTCCTCCAAACTTCTTCCACTTATAGCTCAGTTTCCAGAAGACTGGCCGGAGGCTCGCACGGTGATTGCACAGGGCGACGCTGCAACCAAAGTGC
GGGTAGCGCTAGGTTGACGCGTCAATCGTCCGGGACGTCCTCCAAACTTCTATCATCCCTGAAAGGGAACATCAGTGCCTCTCAGGAGGCTCGCACGGTGATTGCACAGGGCGACGCTGCAACCAAAGTGC
GGGTAGCGCTAGGTTGACGCGTCAATCGTCCGGGACGTCCTCCAAACTGGACCTAATCCTGCAGGAACTTGGCCAACGGAGGCTCGCACGGTGATTGCACAGGGCGACGCTGCAACCAAAGTGC
GGGTAGCGCTAGGTTGACGCGTCAATCGTCCGGGACGTCCTCCAAACCCCCAGGAATGGCTCTTCATTGCTGGCATCGGAGGCTCGCACGGTGATTGCACAGGGCGACGCTGCAACCAAAGTGC
GGGTAGCGCTAGGTTGACGCGTCAATCGTCCGGGACGTCCTCCAAACATCTTGCCCATCTTCCACCTATGAGACTTCCCTATCAGGAGGCTCGCACGGTGATTGCACAGGGCGACGCTGCAACCAAAGTGC
GGGTAGCGCTAGGTTGACGCGTCAATCGTCCGGGACGTCCTCCAAACTAGGTATGACTCCCCAAAACACAGCTTTCCTTTTCCTGGAGGCTCGCACGGTGATTGCACAGGGCGACGCTGCAACCAAAGTGC
GGGTAGCGCTAGGTTGACGCGTCAATCGTCCGGGACGTCCTCCAAACTAGTGTCTTACTTTCAGGGATACTGGAGAGTGCACCTGGAGGCTCGCACGGTGATTGCACAGGGCGACGCTGCAACCAAAGTGC
GGGTAGCGCTAGGTTGACGCGTCAATCGTCCGGGACGTCCTCCAAACAAAAGTGGCATTGGTTTCCTTTGTAACTAACGCAGGGGGAGGCTCGCACGGTGATTGCACAGGGCGACGCTGCAACCAAAGTGC
GGGTAGCGCTAGGTTGACGCGTCAATCGTCCGGGACGTCCTCCAAACGTTCATTTGGAATCCACCCATCATGATGGAGTTTGGCGGAGGCTCGCACGGTGATTGCACAGGGCGACGCTGCAACCAAAGTGC
GGGTAGCGCTAGGTTGACGCGTCAATCGTCCGGGACGTCCTCCAAACTCGCTTTGGGGCATCTAATTGTTATTTCTAGCAGGGAGGAGGCTCGCACGGTGATTGCACAGGGCGACGCTGCAACCAAAGTGC
GGGTAGCGCTAGGTTGACGCGTCAATCGTCCGGGACGTCCTCCAAACTTTTCAGCTTTGCTCTGGTCAAATGCAGGCATTTCTGGAGGCTCGCACGGTGATTGCACAGGGCGACGCTGCAACCAAAGTGC
GGGTAGCGCTAGGTTGACGCGTCAATCGTCCGGGACGTCCTCCAAACCCAGTTCTCCAATTGCTTTGATCTCTCCACTCTCTCCGGAGGCTCGCACGGTGATTGCACAGGGCGACGCTGCAACCAAAGTGC
GGGTAGCGCTAGGTTGACGCGTCAATCGTCCGGGACGTCCTCCAAACATGATTTGCCAAAGAGCTTAAAATGACGGCTCTCTGGGGAGGCTCGCACGGTGATTGCACAGGGCGACGCTGCAACCAAAGTGC
GGGTAGCGCTAGGTTGACGCGTCAATCGTCCGGGACGTCCTCCAAACACTGAGAGGCCACCAGCAGGCATCAATTTCGGAGGCTCGCACGGTGATTGCACAGGGCGACGCTGCAACCAAAGTGC
GGGTAGCGCTAGGTTGACGCGTCAATCGTCCGGGACGTCCTCCAAACAGGTGCACCTCACACTAATGAAGCTGTTTAAAAGCTGGGAGGCTCGCACGGTGATTGCACAGGGCGACGCTGCAACCAAAGTGC
GGGTAGCGCTAGGTTGACGCGTCAATCGTCCGGGACGTCCTCCAAACGGCAGAGAGTTGACCACCCCTTCTTAACCAGAGGAGGCTCGCACGGTGATTGCACAGGGCGACGCTGCAACCAAAGTGC
GGGTAGCGCTAGGTTGACGCGTCAATCGTCCGGGACGTCCTCCAAACGCAAGGAGACTGAAGTGAGGCTGGGATCTGGGGAGGCTCGCACGGTGATTGCACAGGGCGACGCTGCAACCAAAGTGC
GGGTAGCGCTAGGTTGACGCGTCAATCGTCCGGGACGTCCTCCAAACGGGATCCCGAGTGCCACCCATTATGCCTTGGGAGGCTCGCACGGTGATTGCACAGGGCGACGCTGCAACCAAAGTGC
GGGTAGCGCTAGGTTGACGCGTCAATCGTCCGGGACGTCCTCCAAACCTTTCTCTCTCCAAGTCAAATGCAGATGAGGATCCCAGGAGGCTCGCACGGTGATTGCACAGGGCGACGCTGCAACCAAAGTGC
GGGTAGCGCTAGGTTGACGCGTCAATCGTCCGGGACGTCCTCCAAACTCGTCCCCTACTGTCTGTCATGCATTTTACTACCAACGGAGGCTCGCACGGTGATTGCACAGGGCGACGCTGCAACCAAAGTGC
GGGTAGCGCTAGGTTGACGCGTCAATCGTCCGGGACGTCCTCCAAACTCACACAGATCACCATGAGATTCTCCTCTCTCACACTGGAGGCTCGCACGGTGATTGCACAGGGCGACGCTGCAACCAAAGTGC
GGGTAGCGCTAGGTTGACGCGTCAATCGTCCGGGACGTCCTCCAAACTTTAAGCAAGATGTGTAAAGCATGCCTTGTCTGTGGCGGAGGCTCGCACGGTGATTGCACAGGGCGACGCTGCAACCAAAGTGC
GGGTAGCGCTAGGTTGACGCGTCAATCGTCCGGGACGTCCTCCAAACTCTGAGTATTTAGTTGTACCTGCTTGCAAGAGCGTCAGGAGGCTCGCACGGTGATTGCACAGGGCGACGCTGCAACCAAAGTGC
GGGTAGCGCTAGGTTGACGCGTCAATCGTCCGGGACGTCCTCCAAACCTTTCACTGCTCCTAATCATTCCTCCGGTTTTGGGGGGAGGCTCGCACGGTGATTGCACAGGGCGACGCTGCAACCAAAGTGC
GGGTAGCGCTAGGTTGACGCGTCAATCGTCCGGGACGTCCTCCAAACAAGCCTTCCATTGTTGTTCTTTTCACCAAATAGGCCAGGAGGCTCGCACGGTGATTGCACAGGGCGACGCTGCAACCAAAGTGC
GGGTAGCGCTAGGTTGACGCGTCAATCGTCCGGGACGTCCTCCAAACTAGAAATGTACACCAGCCCACCATGGATAAATGCTCCGGAGGCTCGCACGGTGATTGCACAGGGCGACGCTGCAACCAAAGTGC
GGGTAGCGCTAGGTTGACGCGTCAATCGTCCGGGACGTCCTCCAAACAACCTGTATAAAAGAGATCGGGGTTGTCTGCTCTTGCGGAGGCTCGCACGGTGATTGCACAGGGCGACGCTGCAACCAAAGTGC
GGGTAGCGCTAGGTTGACGCGTCAATCGTCCGGGACGTCCTCCAAACATCTACATACACAGACACCAAAGTAATCGCCCTGGTGGGAGGCTCGCACGGTGATTGCACAGGGCGACGCTGCAACCAAAGTGC
GGGTAGCGCTAGGTTGACGCGTCAATCGTCCGGGACGTCCTCCAAACTTTTCACTGTGTCCTTCAGCTTTTGCACATTCCTCTGGGAGGCTCGCACGGTGATTGCACAGGGCGACGCTGCAACCAAAGTGC
GGGTAGCGCTAGGTTGACGCGTCAATCGTCCGGGACGTCCTCCAAACATGTTGTGCTGAAACTTTATGAACCTCCACACCCATGGGAGGCTCGCACGGTGATTGCACAGGGCGACGCTGCAACCAAAGTGC
GGGTAGCGCTAGGTTGACGCGTCAATCGTCCGGGACGTCCTCCAAACGACCTAGATTTCCTGAGCTCTTGAATTCCCTTGGACGGGAGGCTCGCACGGTGATTGCACAGGGCGACGCTGCAACCAAAGTGC
GGGTAGCGCTAGGTTGACGCGTCAATCGTCCGGGACGTCCTCCAAACCCAGAATCCAGTCACTTCCCTTACAAGAGACCTCTCTGGAGGCTCGCACGGTGATTGCACAGGGCGACGCTGCAACCAAAGTGC
GGGTAGCGCTAGGTTGACGCGTCAATCGTCCGGGACGTCCTCCAAACGGGAAATCCTACTGAGGTTTGCATTTGTGGAAAGAGCGGAGGCTCGCACGGTGATTGCACAGGGCGACGCTGCAACCAAAGTGC
GGGTAGCGCTAGGTTGACGCGTCAATCGTCCGGGACGTCCTCCAAACTGTGAAAATTAAGCCCTCTTCAGTAAGTCCTAGGGCCGGAGGCTCGCACGGTGATTGCACAGGGCGACGCTGCAACCAAAGTGC
GGGTAGCGCTAGGTTGACGCGTCAATCGTCCGGGACGTCCTCCAAACATAGTTTCAAATGTTCAGCGGCATCAAGTTCACACGCGGAGGCTCGCACGGTGATTGCACAGGGCGACGCTGCAACCAAAGTGC
GGGTAGCGCTAGGTTGACGCGTCAATCGTCCGGGACGTCCTCCAAACCTCCGATTTTGTGGCTTCCCATGACATCAACAGGGGAGGCTCGCACGGTGATTGCACAGGGCGACGCTGCAACCAAAGTGC
GGGTAGCGCTAGGTTGACGCGTCAATCGTCCGGGACGTCCTCCAAACGCAACAGTCTGCCGACCCACCACCGACTTTGGAGGCTCGCACGGTGATTGCACAGGGCGACGCTGCAACCAAAGTGC
GGGTAGCGCTAGGTTGACGCGTCAATCGTCCGGGACGTCCTCCAAACTCCCACTTTCTCTTCTAATTTCTCTCCATGCCATCCCGGAGGCTCGCACGGTGATTGCACAGGGCGACGCTGCAACCAAAGTGC
GGGTAGCGCTAGGTTGACGCGTCAATCGTCCGGGACGTCCTCCAAACTTTTCCCAACACCTTTCTCATCTTACGCAACCTGAGTGGAGGCTCGCACGGTGATTGCACAGGGCGACGCTGCAACCAAAGTGC
GGGTAGCGCTAGGTTGACGCGTCAATCGTCCGGGACGTCCTCCAAACTTTTCCGAAGACAAACCAATGCGGCTTCTGTACAGGAGGCTCGCACGGTGATTGCACAGGGCGACGCTGCAACCAAAGTGC
GGGTAGCGCTAGGTTGACGCGTCAATCGTCCGGGACGTCCTCCAAACTCTATGATCCCAAATGACTCCTGATAACACTGCTGCCGGAGGCTCGCACGGTGATTGCACAGGGCGACGCTGCAACCAAAGTGC
GGGTAGCGCTAGGTTGACGCGTCAATCGTCCGGGACGTCCTCCAAACAAGACACTTCTTCCTGCTAGCTTAGGGGTAGGGGGGAGGCTCGCACGGTGATTGCACAGGGCGACGCTGCAACCAAAGTGC
GGGTAGCGCTAGGTTGACGCGTCAATCGTCCGGGACGTCCTCCAAACTAGGTGGGCATAGGCTGAGAGCTGAACTTACACGGAGGCTCGCACGGTGATTGCACAGGGCGACGCTGCAACCAAAGTGC
GGGTAGCGCTAGGTTGACGCGTCAATCGTCCGGGACGTCCTCCAAACATGTGCTTAGCCTGTTGCTGAGCCTGGCCAGGAGGCTCGCACGGTGATTGCACAGGGCGACGCTGCAACCAAAGTGC
GGGTAGCGCTAGGTTGACGCGTCAATCGTCCGGGACGTCCTCCAAACGGAAGGGCACCACCTCCTGCATATAAGGCTGGAGGCTCGCACGGTGATTGCACAGGGCGACGCTGCAACCAAAGTGC
GGGTAGCGCTAGGTTGACGCGTCAATCGTCCGGGACGTCCTCCAAACAACCTATCAGATTGAGGGAACAGCACTTCTTCAAGGGGGAGGCTCGCACGGTGATTGCACAGGGCGACGCTGCAACCAAAGTGC
GGGTAGCGCTAGGTTGACGCGTCAATCGTCCGGGACGTCCTCCAAACTGAAGTTCAGCACCTGCTTCATCAGATAGCAGCGGGAGGCTCGCACGGTGATTGCACAGGGCGACGCTGCAACCAAAGTGC
GGGTAGCGCTAGGTTGACGCGTCAATCGTCCGGGACGTCCTCCAAACCTCACTCATCTGCAGGTGGAAGGGAAACAGAAAGGGGAGGCTCGCACGGTGATTGCACAGGGCGACGCTGCAACCAAAGTGC
GGGTAGCGCTAGGTTGACGCGTCAATCGTCCGGGACGTCCTCCAAACAAGTACCCATGGACGGCACACGGCCCTGTTGGAGGCTCGCACGGTGATTGCACAGGGCGACGCTGCAACCAAAGTGC
GGGTAGCGCTAGGTTGACGCGTCAATCGTCCGGGACGTCCTCCAAACCGTCACAACTGTAGCTTACACTGACTCCGTGGAGGAGGCTCGCACGGTGATTGCACAGGGCGACGCTGCAACCAAAGTGC
GGGTAGCGCTAGGTTGACGCGTCAATCGTCCGGGACGTCCTCCAAACACAGTTTCTCCCCAATGAGACGAACGTCTGTGTGGAGGCTCGCACGGTGATTGCACAGGGCGACGCTGCAACCAAAGTGC
GGGTAGCGCTAGGTTGACGCGTCAATCGTCCGGGACGTCCTCCAAACATCAGCCAAGCTAGCCTGGAAGAGAAGAAAAGACTGGAGGCTCGCACGGTGATTGCACAGGGCGACGCTGCAACCAAAGTGC
GGGTAGCGCTAGGTTGACGCGTCAATCGTCCGGGACGTCCTCCAAACAAATTTATACATAGACATGTGCCCCATCCCGTCTCCCGGAGGCTCGCACGGTGATTGCACAGGGCGACGCTGCAACCAAAGTGC
GGGTAGCGCTAGGTTGACGCGTCAATCGTCCGGGACGTCCTCCAAACCAGATGTGTGCATGAGTTTAGAACAATGCACAGAGGCGGAGGCTCGCACGGTGATTGCACAGGGCGACGCTGCAACCAAAGTGC
GGGTAGCGCTAGGTTGACGCGTCAATCGTCCGGGACGTCCTCCAAACAATCATCAGATGGATTACTGAATGGCCGCTCTTTGGGGGAGGCTCGCACGGTGATTGCACAGGGCGACGCTGCAACCAAAGTGC
GGGTAGCGCTAGGTTGACGCGTCAATCGTCCGGGACGTCCTCCAAACATCTACCCTCAGGGATAAACAGTGGGTTCCTAAAGCTGGAGGCTCGCACGGTGATTGCACAGGGCGACGCTGCAACCAAAGTGC
GGGTAGCGCTAGGTTGACGCGTCAATCGTCCGGGACGTCCTCCAAACAAGAGCAGGATTGAGATGTATACCTCCTTAGCCAGCAGGAGGCTCGCACGGTGATTGCACAGGGCGACGCTGCAACCAAAGTGC
GGGTAGCGCTAGGTTGACGCGTCAATCGTCCGGGACGTCCTCCAAACTGAAGGTGCGGTTGGTGATATAGGGCTGCTGGAGGCTCGCACGGTGATTGCACAGGGCGACGCTGCAACCAAAGTGC
GGGTAGCGCTAGGTTGACGCGTCAATCGTCCGGGACGTCCTCCAAACGGAAGTTGGACTTGTCAAGCCTGCAGTGGGGGAGGCTCGCACGGTGATTGCACAGGGCGACGCTGCAACCAAAGTGC
GGGTAGCGCTAGGTTGACGCGTCAATCGTCCGGGACGTCCTCCAAACCTGATGGGCGCAGCTGCTCCTCCCTGTACCGGAGGCTCGCACGGTGATTGCACAGGGCGACGCTGCAACCAAAGTGC
GGGTAGCGCTAGGTTGACGCGTCAATCGTCCGGGACGTCCTCCAAACAAGAGGGCCAAGAGAAGGAGGCAGCTGGTGGGAGGCTCGCACGGTGATTGCACAGGGCGACGCTGCAACCAAAGTGC
GGGTAGCGCTAGGTTGACGCGTCAATCGTCCGGGACGTCCTCCAAACGCCAGGGTCCCCATAAGGAAAGAGCTCACAGGAGGCTCGCACGGTGATTGCACAGGGCGACGCTGCAACCAAAGTGC
GGGTAGCGCTAGGTTGACGCGTCAATCGTCCGGGACGTCCTCCAAACGATTTCTGCAGGGCGGCCATTGCAGACAATGGAGGCTCGCACGGTGATTGCACAGGGCGACGCTGCAACCAAAGTGC
GGGTAGCGCTAGGTTGACGCGTCAATCGTCCGGGACGTCCTCCAAACTCTAACTCGAGCAACTGGTGACTGGGGAAGGGGAGGCTCGCACGGTGATTGCACAGGGCGACGCTGCAACCAAAGTGC
GGGTAGCGCTAGGTTGACGCGTCAATCGTCCGGGACGTCCTCCAAACTCAAACTAACCAATTGTACCAAGTTTGCCGAAACGCTGGAGGCTCGCACGGTGATTGCACAGGGCGACGCTGCAACCAAAGTGC
GGGTAGCGCTAGGTTGACGCGTCAATCGTCCGGGACGTCCTCCAAACTACCTGTTCTGAAGATTCTGCTTGTGACGGGGAGGAGGCTCGCACGGTGATTGCACAGGGCGACGCTGCAACCAAAGTGC
GGGTAGCGCTAGGTTGACGCGTCAATCGTCCGGGACGTCCTCCAAACTTTCCAGTACTGTCTTCTGAGAACGACCTAACCACCAGGAGGCTCGCACGGTGATTGCACAGGGCGACGCTGCAACCAAAGTGC
GGGTAGCGCTAGGTTGACGCGTCAATCGTCCGGGACGTCCTCCAAACCAGGAGCCCACAAAACACCACCTCTATCCTTTCCGGAGGCTCGCACGGTGATTGCACAGGGCGACGCTGCAACCAAAGTGC
GGGTAGCGCTAGGTTGACGCGTCAATCGTCCGGGACGTCCTCCAAACTGCAAGTGTTTCCCTAAAACGTCACTATTAGAGCCCGGGAGGCTCGCACGGTGATTGCACAGGGCGACGCTGCAACCAAAGTGC
GGGTAGCGCTAGGTTGACGCGTCAATCGTCCGGGACGTCCTCCAAACATCTCCTATAGTGGCTGAGTAAGCATTTTGGTCACGGGGAGGCTCGCACGGTGATTGCACAGGGCGACGCTGCAACCAAAGTGC
GGGTAGCGCTAGGTTGACGCGTCAATCGTCCGGGACGTCCTCCAAACTACACCTAAAACTAGACTGGAAATTCTCCCGCAGAGCGGAGGCTCGCACGGTGATTGCACAGGGCGACGCTGCAACCAAAGTGC
GGGTAGCGCTAGGTTGACGCGTCAATCGTCCGGGACGTCCTCCAAACTTTTGAGATGGCACAGACCTAAGCAAGGTGCCGGAGGCTCGCACGGTGATTGCACAGGGCGACGCTGCAACCAAAGTGC
GGGTAGCGCTAGGTTGACGCGTCAATCGTCCGGGACGTCCTCCAAACACTGCAAAGGGTCGGAACCACATGAGGACAGGAGGCTCGCACGGTGATTGCACAGGGCGACGCTGCAACCAAAGTGC
GGGTAGCGCTAGGTTGACGCGTCAATCGTCCGGGACGTCCTCCAAACCTGAGCATTTGTGAAGGTGGCCAGAGGAGAAAGGAGGCTCGCACGGTGATTGCACAGGGCGACGCTGCAACCAAAGTGC
GGGTAGCGCTAGGTTGACGCGTCAATCGTCCGGGACGTCCTCCAAACAAATAGGTGTGTTCCAAATGTTTCCTTGGGGTTGACCGGAGGCTCGCACGGTGATTGCACAGGGCGACGCTGCAACCAAAGTGC
GGGTAGCGCTAGGTTGACGCGTCAATCGTCCGGGACGTCCTCCAAACTCTAAAGTTGATGTTTGACCCAGTCCTGCTTACCAGCGGAGGCTCGCACGGTGATTGCACAGGGCGACGCTGCAACCAAAGTGC
GGGTAGCGCTAGGTTGACGCGTCAATCGTCCGGGACGTCCTCCAAACATGTCAGAAAATTGCAAAGCCCTCTTTAAGAGCAGCAGGAGGCTCGCACGGTGATTGCACAGGGCGACGCTGCAACCAAAGTGC
GGGTAGCGCTAGGTTGACGCGTCAATCGTCCGGGACGTCCTCCAAACGTGTGTCTCTTATTCATTGTATGCCCCTGATGGACCAGGAGGCTCGCACGGTGATTGCACAGGGCGACGCTGCAACCAAAGTGC
GGGTAGCGCTAGGTTGACGCGTCAATCGTCCGGGACGTCCTCCAAACTCACTAAAGGGAAAATCTGCTCTGGTGTTGTATGGGGGGAGGCTCGCACGGTGATTGCACAGGGCGACGCTGCAACCAAAGTGC
GGGTAGCGCTAGGTTGACGCGTCAATCGTCCGGGACGTCCTCCAAACAGGTGATCCTGTGAAAACAGCAACCAGAGACATATGTGGAGGCTCGCACGGTGATTGCACAGGGCGACGCTGCAACCAAAGTGC
GGGTAGCGCTAGGTTGACGCGTCAATCGTCCGGGACGTCCTCCAAACTGGGCCTTTTCTGCAGTTGTTTCCTTGTGAATTTTCAGGAGGCTCGCACGGTGATTGCACAGGGCGACGCTGCAACCAAAGTGC
GGGTAGCGCTAGGTTGACGCGTCAATCGTCCGGGACGTCCTCCAAACAGTCTCTCCCAAAGCCACCGCAGATGAAGAGGAGGCTCGCACGGTGATTGCACAGGGCGACGCTGCAACCAAAGTGC
GGGTAGCGCTAGGTTGACGCGTCAATCGTCCGGGACGTCCTCCAAACTCACATTTACCTTGGTGTGAATAAGTACCCAGCTGGCGGAGGCTCGCACGGTGATTGCACAGGGCGACGCTGCAACCAAAGTGC
GGGTAGCGCTAGGTTGACGCGTCAATCGTCCGGGACGTCCTCCAAACACTCATCTCCTGAGAACACGAAGAGCAAGTGATTCACGGAGGCTCGCACGGTGATTGCACAGGGCGACGCTGCAACCAAAGTGC
GGGTAGCGCTAGGTTGACGCGTCAATCGTCCGGGACGTCCTCCAAACAGCCAGTGAGGAGAAGAGGTTAGAGGTACAGCAGGAGGCTCGCACGGTGATTGCACAGGGCGACGCTGCAACCAAAGTGC
GGGTAGCGCTAGGTTGACGCGTCAATCGTCCGGGACGTCCTCCAAACACTGCATTTACTTCCCACTTCTGCTCTAAGGTAACCCGGAGGCTCGCACGGTGATTGCACAGGGCGACGCTGCAACCAAAGTGC
GGGTAGCGCTAGGTTGACGCGTCAATCGTCCGGGACGTCCTCCAAACTGGTGGTACCCAGAGTAACTTCCTACCAGTCCCGGAGGCTCGCACGGTGATTGCACAGGGCGACGCTGCAACCAAAGTGC
GGGTAGCGCTAGGTTGACGCGTCAATCGTCCGGGACGTCCTCCAAACACCTCACCTGCCACAATCTGCCCACAAAGAGGAGGCTCGCACGGTGATTGCACAGGGCGACGCTGCAACCAAAGTGC
GGGTAGCGCTAGGTTGACGCGTCAATCGTCCGGGACGTCCTCCAAACCACTTGTCAACCATAGCCACCTTTCCCTTCTTCCGGAGGCTCGCACGGTGATTGCACAGGGCGACGCTGCAACCAAAGTGC
GGGTAGCGCTAGGTTGACGCGTCAATCGTCCGGGACGTCCTCCAAACTAGGTGTAAAGAGTCATAACCCACACTTGCTTCTGCCGGAGGCTCGCACGGTGATTGCACAGGGCGACGCTGCAACCAAAGTGC
GGGTAGCGCTAGGTTGACGCGTCAATCGTCCGGGACGTCCTCCAAACAAACTCCGTGATTCTTGGTGTTGTCTTACCAGATCCTGGAGGCTCGCACGGTGATTGCACAGGGCGACGCTGCAACCAAAGTGC
GGGTAGCGCTAGGTTGACGCGTCAATCGTCCGGGACGTCCTCCAAACCTCAGCCTTTGATGGGAACATTGTGGGCCAGGAGGCTCGCACGGTGATTGCACAGGGCGACGCTGCAACCAAAGTGC
GGGTAGCGCTAGGTTGACGCGTCAATCGTCCGGGACGTCCTCCAAACAGTAAACTAAACATTTGCTACACCCTCACGACCCTGTGGAGGCTCGCACGGTGATTGCACAGGGCGACGCTGCAACCAAAGTGC
GGGTAGCGCTAGGTTGACGCCGACGCTGCAACCAAAGTGC
GGGTAGCGCTAGGTTGACGCGTCAATCGTCCGGGACGTCCTCCAAACATCCCAAATTTGGGTTAGTTGGACAAGATGTCGCTCTGTGCGATGCGTTTGCGAGTGTGTCTGCCGACGCTGCAACCAAAGTGC
GGGTAGCGCTAGGTTGACGCGTCAATCGTCCGGGACGTCCTCCAAACGAATCAGGGCAGATCTGAAATGTAGCCTGTTGCAAGTGCGATGCGTTTGCGAGTGTGTCTGCCGACGCTGCAACCAAAGTGC
GGGTAGCGCTAGGTTGACGCGTCAATCGTCCGGGACGTCCTCCAAACAAAGTAAAAGTACTCAAATGAGTTGGCAGGGGCAAGCGTGCGATGCGTTTGCGAGTGTGTCTGCCGACGCTGCAACCAAAGTGC
GGGTAGCGCTAGGTTGACGCGTCAATCGTCCGGGACGTCCTCCAAACGCATGAGTATGAGAGGAAATATCTGAGCGAGGTCTGCGTGCGATGCGTTTGCGAGTGTGTCTGCCGACGCTGCAACCAAAGTGC
GGGTAGCGCTAGGTTGACGCGTCAATCGTCCGGGACGTCCTCCAAACAAAAGCTACACACAAGGTGCTGCATGAGAGAAAGGGTGCGATGCGTTTGCGAGTGTGTCTGCCGACGCTGCAACCAAAGTGC
GGGTAGCGCTAGGTTGACGCGTCAATCGTCCGGGACGTCCTCCAAACTTCCATTTACTAAGCTCCTACCATTCAGCAGGCATGGGTGCGATGCGTTTGCGAGTGTGTCTGCCGACGCTGCAACCAAAGTGC
GGGTAGCGCTAGGTTGACGCGTCAATCGTCCGGGACGTCCTCCAAACAGCGTTCAGGAAACACCAGCTATTAACTACAAGGAGCGTGCGATGCGTTTGCGAGTGTGTCTGCCGACGCTGCAACCAAAGTGC
GGGTAGCGCTAGGTTGACGCGTCAATCGTCCGGGACGTCCTCCAAACTTAGCATGAGTCTCCTTTTGCCTTCATCCTGTATGGTGTGCGATGCGTTTGCGAGTGTGTCTGCCGACGCTGCAACCAAAGTGC
GGGTAGCGCTAGGTTGACGCGTCAATCGTCCGGGACGTCCTCCAAACTCCCAATGTTCTCGAATTCGGGTAATAACTTCCAGGGGTGCGATGCGTTTGCGAGTGTGTCTGCCGACGCTGCAACCAAAGTGC
GGGTAGCGCTAGGTTGACGCGTCAATCGTCCGGGACGTCCTCCAAACCTTCCTTCCTCTGCTCAGTTCTGTACCTCCCAGGTGCGATGCGTTTGCGAGTGTGTCTGCCGACGCTGCAACCAAAGTGC
GGGTAGCGCTAGGTTGACGCGTCAATCGTCCGGGACGTCCTCCAAACTCAGGCCTCTCCTCTTAATTTGTGGACAAAACCCAGTGCGATGCGTTTGCGAGTGTGTCTGCCGACGCTGCAACCAAAGTGC
GGGTAGCGCTAGGTTGACGCGTCAATCGTCCGGGACGTCCTCCAAACAATACCAGCCAGATAGTCTGCACTTGATATGAAGGGCGTGCGATGCGTTTGCGAGTGTGTCTGCCGACGCTGCAACCAAAGTGC
GGGTAGCGCTAGGTTGACGCGTCAATCGTCCGGGACGTCCTCCAAACAGTAGAGACCTGTTGTGGGCAGTTAAGCATGGAGTGCGATGCGTTTGCGAGTGTGTCTGCCGACGCTGCAACCAAAGTGC
GGGTAGCGCTAGGTTGACGCGTCAATCGTCCGGGACGTCCTCCAAACTCTAAGCAGAGAGCCAGAGAGTTATGAATTGGGGAGGGTGCGATGCGTTTGCGAGTGTGTCTGCCGACGCTGCAACCAAAGTGC
GGGTAGCGCTAGGTTGACGCGTCAATCGTCCGGGACGTCCTCCAAACCAGAAATTGGCATCAGTGAGACCTGCTAGGAGGCGTGCGATGCGTTTGCGAGTGTGTCTGCCGACGCTGCAACCAAAGTGC
GGGTAGCGCTAGGTTGACGCGTCAATCGTCCGGGACGTCCTCCAAACAAAGAGTGGTCCCGTACTGTACTTGTGATCAGTCAGAGTGCGATGCGTTTGCGAGTGTGTCTGCCGACGCTGCAACCAAAGTGC
GGGTAGCGCTAGGTTGACGCGTCAATCGTCCGGGACGTCCTCCAAACATAAGGTCCCTGAGAAAGGTGCAGCCACTTAGGGTGCGATGCGTTTGCGAGTGTGTCTGCCGACGCTGCAACCAAAGTGC
GGGTAGCGCTAGGTTGACGCGTCAATCGTCCGGGACGTCCTCCAAACTTGAGGGGAATTTAAGCCGTATTCAAACACCTCAGGCGTGCGATGCGTTTGCGAGTGTGTCTGCCGACGCTGCAACCAAAGTGC
GGGTAGCGCTAGGTTGACGCGTCAATCGTCCGGGACGTCCTCCAAACAGAATCGCCAAACTGCTGTTGCCACTGATCAGTGCGATGCGTTTGCGAGTGTGTCTGCCGACGCTGCAACCAAAGTGC
GGGTAGCGCTAGGTTGACGCGTCAATCGTCCGGGACGTCCTCCAAACTATCTGCAGGTGCCCAAATGCTTCTCAATGACTTTCGTGCGATGCGTTTGCGAGTGTGTCTGCCGACGCTGCAACCAAAGTGC
GGGTAGCGCTAGGTTGACGCGTCAATCGTCCGGGACGTCCTCCAAACCATTGATTCATGGGCCCAAGAGAAATAAAGCAGTGGCGTGCGATGCGTTTGCGAGTGTGTCTGCCGACGCTGCAACCAAAGTGC
GGGTAGCGCTAGGTTGACGCGTCAATCGTCCGGGACGTCCTCCAAACCCAAAGGTCCCATCCTGTCCCCAGATGTGAGTGCGATGCGTTTGCGAGTGTGTCTGCCGACGCTGCAACCAAAGTGC
GGGTAGCGCTAGGTTGACGCGTCAATCGTCCGGGACGTCCTCCAAACCTTCCCCTGCCCTATTCCAGTTGAAATAATAGGCAGGGTGCGATGCGTTTGCGAGTGTGTCTGCCGACGCTGCAACCAAAGTGC
GGGTAGCGCTAGGTTGACGCGTCAATCGTCCGGGACGTCCTCCAAACAGCAGAGGTCAAATACTACTTCCCCTATGGAAAGGGGGTGCGATGCGTTTGCGAGTGTGTCTGCCGACGCTGCAACCAAAGTGC
GGGTAGCGCTAGGTTGACGCGTCAATCGTCCGGGACGTCCTCCAAACTGGAGTAGTGATGAGAATGGGAGTGTGGGGTGGTGCGATGCGTTTGCGAGTGTGTCTGCCGACGCTGCAACCAAAGTGC
GGGTAGCGCTAGGTTGACGCGTCAATCGTCCGGGACGTCCTCCAAACGGTGTAAATGTGGGGTAGAGTGTAAGGTGTCTGTGGGTGCGATGCGTTTGCGAGTGTGTCTGCCGACGCTGCAACCAAAGTGC
GGGTAGCGCTAGGTTGACGCGTCAATCGTCCGGGACGTCCTCCAAACAAGAGACAAAGGGAGTCAGTGGGTCATAGATCTTTGCGTGCGATGCGTTTGCGAGTGTGTCTGCCGACGCTGCAACCAAAGTGC
GGGTAGCGCTAGGTTGACGCGTCAATCGTCCGGGACGTCCTCCAAACCCTCATAGAGACAGCTGAGGCACCTAATCCAGAAAACGTGCGATGCGTTTGCGAGTGTGTCTGCCGACGCTGCAACCAAAGTGC
GGGTAGCGCTAGGTTGACGCGTCAATCGTCCGGGACGTCCTCCAAACAAACAATAAGTGGGTTGGCCAAGACTGTTTGCTTTCAGTGCGATGCGTTTGCGAGTGTGTCTGCCGACGCTGCAACCAAAGTGC
GGGTAGCGCTAGGTTGACGCGTCAATCGTCCGGGACGTCCTCCAAACTCGATGACTTCTCGACACAGCCTTAGCAAAATCATGCGTGCGATGCGTTTGCGAGTGTGTCTGCCGACGCTGCAACCAAAGTGC
GGGTAGCGCTAGGTTGACGCGTCAATCGTCCGGGACGTCCTCCAAACCTATTCCTCATCAGAAACTCAGACAACAAGGGAGGCCGTGCGATGCGTTTGCGAGTGTGTCTGCCGACGCTGCAACCAAAGTGC
GGGTAGCGCTAGGTTGACGCGTCAATCGTCCGGGACGTCCTCCAAACAATGAGAACTGATTTCTTTGGCTTCAGTGCCTGCTCGTGCGATGCGTTTGCGAGTGTGTCTGCCGACGCTGCAACCAAAGTGC
GGGTAGCGCTAGGTTGACGCGTCAATCGTCCGGGACGTCCTCCAAACCTCGCACCTCCACACACCGCCCACAGAGAGGTGCGATGCGTTTGCGAGTGTGTCTGCCGACGCTGCAACCAAAGTGC
GGGTAGCGCTAGGTTGACGCGTCAATCGTCCGGGACGTCCTCCAAACAAGGTCAAGGAAATGACCAGAGATGTTCTTGCTTGGGGTGCGATGCGTTTGCGAGTGTGTCTGCCGACGCTGCAACCAAAGTGC
GGGTAGCGCTAGGTTGACGCGTCAATCGTCCGGGACGTCCTCCAAACCCCAATTCCCAATCCTCCAGCCTCACTAGAATGTGTGCGATGCGTTTGCGAGTGTGTCTGCCGACGCTGCAACCAAAGTGC
GGGTAGCGCTAGGTTGACGCGTCAATCGTCCGGGACGTCCTCCAAACAGGCTCTTCTCAGCCAGTTATGAAAACATACTCCTGCGTGCGATGCGTTTGCGAGTGTGTCTGCCGACGCTGCAACCAAAGTGC
GGGTAGCGCTAGGTTGACGCGTCAATCGTCCGGGACGTCCTCCAAACTGGAAGAAAATGAGATGGTTTACCTATGGGCACAGCTGTGCGATGCGTTTGCGAGTGTGTCTGCCGACGCTGCAACCAAAGTGC
GGGTAGCGCTAGGTTGACGCGTCAATCGTCCGGGACGTCCTCCAAACATGACTGGCTGCATCACACGCTTTCTAGTCTTCCGTGCGATGCGTTTGCGAGTGTGTCTGCCGACGCTGCAACCAAAGTGC
GGGTAGCGCTAGGTTGACGCGTCAATCGTCCGGGACGTCCTCCAAACAAAACCATGGAATGAAACAAGCATGACTTGGGGACCGTGCGATGCGTTTGCGAGTGTGTCTGCCGACGCTGCAACCAAAGTGC
GGGTAGCGCTAGGTTGACGCGTCAATCGTCCGGGACGTCCTCCAAACTGCATCTCTACTTGCTGGATTTCGGCTATTAGGGATCGTGCGATGCGTTTGCGAGTGTGTCTGCCGACGCTGCAACCAAAGTGC
GGGTAGCGCTAGGTTGACGCGTCAATCGTCCGGGACGTCCTCCAAACATTACATGATTATTCAAGCAGAACGTGGGGAGGAGGTGTGCGATGCGTTTGCGAGTGTGTCTGCCGACGCTGCAACCAAAGTGC
GGGTAGCGCTAGGTTGACGCGTCAATCGTCCGGGACGTCCTCCAAACCCCCTCACTTTAGAAACCGAGGTTGGGAGAATTACTGTGCGATGCGTTTGCGAGTGTGTCTGCCGACGCTGCAACCAAAGTGC
GGGTAGCGCTAGGTTGACGCGTCAATCGTCCGGGACGTCCTCCAAACAGAAGAAAGAGAGTACATGTGGGACCAAGGGAGAAGGGTGCGATGCGTTTGCGAGTGTGTCTGCCGACGCTGCAACCAAAGTGC
GGGTAGCGCTAGGTTGACGCGTCAATCGTCCGGGACGTCCTCCAAACAGGGGCAAACTGCCCACTTCCTCATGTTGTGTGCGATGCGTTTGCGAGTGTGTCTGCCGACGCTGCAACCAAAGTGC
GGGTAGCGCTAGGTTGACGCGTCAATCGTCCGGGACGTCCTCCAAACGAAGGATAAAGCCTGCCCTCATGACATCAGCAGGTGCGATGCGTTTGCGAGTGTGTCTGCCGACGCTGCAACCAAAGTGC
GGGTAGCGCTAGGTTGACGCGTCAATCGTCCGGGACGTCCTCCAAACCTTTGTGCTTTATTCTTTAGGCTAAAGTCGGGCCTGGGTGCGATGCGTTTGCGAGTGTGTCTGCCGACGCTGCAACCAAAGTGC
GGGTAGCGCTAGGTTGACGCGTCAATCGTCCGGGACGTCCTCCAAACGAGACCCACTCAAGGAAGGTTGGGTCATGAAGGGTGCGATGCGTTTGCGAGTGTGTCTGCCGACGCTGCAACCAAAGTGC
GGGTAGCGCTAGGTTGACGCGTCAATCGTCCGGGACGTCCTCCAAACCCGATGCCTGTGTGTCTCAAGAGAGTTGTCCAGTGCGATGCGTTTGCGAGTGTGTCTGCCGACGCTGCAACCAAAGTGC
GGGTAGCGCTAGGTTGACGCGTCAATCGTCCGGGACGTCCTCCAAACGTTCTCCCTAACACAGCTGGCATAGATGCCTCAGTGCGATGCGTTTGCGAGTGTGTCTGCCGACGCTGCAACCAAAGTGC
GGGTAGCGCTAGGTTGACGCGTCAATCGTCCGGGACGTCCTCCAAACGGGTGACCCAATGACAATGACTACCAAGTTCACCGTGCGATGCGTTTGCGAGTGTGTCTGCCGACGCTGCAACCAAAGTGC
GGGTAGCGCTAGGTTGACGCGTCAATCGTCCGGGACGTCCTCCAAACACTGAGCAGCTCCATCCACCTCAGTTGCAGGTGCGATGCGTTTGCGAGTGTGTCTGCCGACGCTGCAACCAAAGTGC
GGGTAGCGCTAGGTTGACGCGTCAATCGTCCGGGACGTCCTCCAAACGTCCATCTTGAGGGCACTCTAGATGCAAAACCAGGGTGCGATGCGTTTGCGAGTGTGTCTGCCGACGCTGCAACCAAAGTGC
GGGTAGCGCTAGGTTGACGCGTCAATCGTCCGGGACGTCCTCCAAACTTATTAGACCTGTTCTCCTCTTGTTGTTTCGCCAGCCGTGCGATGCGTTTGCGAGTGTGTCTGCCGACGCTGCAACCAAAGTGC
GGGTAGCGCTAGGTTGACGCGTCAATCGTCCGGGACGTCCTCCAAACCTGGTTGCCCTCATTTGACTCCCAGGCTATCGTGCGATGCGTTTGCGAGTGTGTCTGCCGACGCTGCAACCAAAGTGC
GGGTAGCGCTAGGTTGACGCGTCAATCGTCCGGGACGTCCTCCAAACCAGGGTCTCCAGTGTTTCTCCCATGGAGGCGTGCGATGCGTTTGCGAGTGTGTCTGCCGACGCTGCAACCAAAGTGC
GGGTAGCGCTAGGTTGACGCGTCAATCGTCCGGGACGTCCTCCAAACACAACCTCCATAGAAGCACCTCATGCTCTGAATGGGTGCGATGCGTTTGCGAGTGTGTCTGCCGACGCTGCAACCAAAGTGC
GGGTAGCGCTAGGTTGACGCGTCAATCGTCCGGGACGTCCTCCAAACAAAATTTACCTGGCCTGTGTTGCCACTACCCAGTGCGATGCGTTTGCGAGTGTGTCTGCCGACGCTGCAACCAAAGTGC
GGGTAGCGCTAGGTTGACGCGTCAATCGTCCGGGACGTCCTCCAAACGGGGCACCAGATCACTGAGACTATAACGGCCGTGCGATGCGTTTGCGAGTGTGTCTGCCGACGCTGCAACCAAAGTGC
GGGTAGCGCTAGGTTGACGCGTCAATCGTCCGGGACGTCCTCCAAACTCTTGTGCCTCTTACACATATGCATTAGGCTCAACCCGTGCGATGCGTTTGCGAGTGTGTCTGCCGACGCTGCAACCAAAGTGC
GGGTAGCGCTAGGTTGACGCGTCAATCGTCCGGGACGTCCTCCAAACAAATTGCATCAGGTTGATTTCTGGGACATTACTGCGTGTGCGATGCGTTTGCGAGTGTGTCTGCCGACGCTGCAACCAAAGTGC
GGGTAGCGCTAGGTTGACGCGTCAATCGTCCGGGACGTCCTCCAAACCCCCGACCGAGATGTCCAGAAAACCTCTTTCAGTGCGATGCGTTTGCGAGTGTGTCTGCCGACGCTGCAACCAAAGTGC
GGGTAGCGCTAGGTTGACGCGTCAATCGTCCGGGACGTCCTCCAAACAGACCCTCTCCGAAAGCATGTTCTAAAGTCATGTTCAGTGCGATGCGTTTGCGAGTGTGTCTGCCGACGCTGCAACCAAAGTGC
GGGTAGCGCTAGGTTGACGCGTCAATCGTCCGGGACGTCCTCCAAACCCTGTGGGATTCCCCTGTATCGCCCTGGTGGTGCGATGCGTTTGCGAGTGTGTCTGCCGACGCTGCAACCAAAGTGC
GGGTAGCGCTAGGTTGACGCGTCAATCGTCCGGGACGTCCTCCAAACGGGGAAAGAAGTGGATGCTAGCATCACTTTACCTCAGTGCGATGCGTTTGCGAGTGTGTCTGCCGACGCTGCAACCAAAGTGC
GGGTAGCGCTAGGTTGACGCGTCAATCGTCCGGGACGTCCTCCAAACATCTGCAAAGAACCTTCCCATGAACTTACCAAAAGCCGTGCGATGCGTTTGCGAGTGTGTCTGCCGACGCTGCAACCAAAGTGC
GGGTAGCGCTAGGTTGACGCGTCAATCGTCCGGGACGTCCTCCAAACTTTATTGCGTTTAACTGTGTACCCAGTCCTGTGCTCAGTGCGATGCGTTTGCGAGTGTGTCTGCCGACGCTGCAACCAAAGTGC
GGGTAGCGCTAGGTTGACGCGTCAATCGTCCGGGACGTCCTCCAAACATTAGTGCCGTCAAACACAAAGGAGTGGTAATTCGGGGTGCGATGCGTTTGCGAGTGTGTCTGCCGACGCTGCAACCAAAGTGC
GGGTAGCGCTAGGTTGACGCGTCAATCGTCCGGGACGTCCTCCAAACTGGAATAACAATCCTTCTGGCTGCAGAGATTCAGACAGTGCGATGCGTTTGCGAGTGTGTCTGCCGACGCTGCAACCAAAGTGC
GGGTAGCGCTAGGTTGACGCGTCAATCGTCCGGGACGTCCTCCAAACCCCCAGATGTCCAAGCACCAAACACAGTGAGTGCGATGCGTTTGCGAGTGTGTCTGCCGACGCTGCAACCAAAGTGC
GGGTAGCGCTAGGTTGACGCGTCAATCGTCCGGGACGTCCTCCAAACAAAATTGGAGAGTTTGTTTTGGCAGAGAGTGGAAGCAGTGCGATGCGTTTGCGAGTGTGTCTGCCGACGCTGCAACCAAAGTGC
GGGTAGCGCTAGGTTGACGCGTCAATCGTCCGGGACGTCCTCCAAACGTGGCCCCTATGACAGTGGCACAAGCCCACGTGCGATGCGTTTGCGAGTGTGTCTGCCGACGCTGCAACCAAAGTGC
GGGTAGCGCTAGGTTGACGCGTCAATCGTCCGGGACGTCCTCCAAACATTAGCTTCACTGCTGGAGGCGCTCCCCATGTGCGATGCGTTTGCGAGTGTGTCTGCCGACGCTGCAACCAAAGTGC
GGGTAGCGCTAGGTTGACGCGTCAATCGTCCGGGACGTCCTCCAAACCCCCAGAGTCTCACCCATTGTCGAAGTAGCCGTGCGATGCGTTTGCGAGTGTGTCTGCCGACGCTGCAACCAAAGTGC
GGGTAGCGCTAGGTTGACGCGTCAATCGTCCGGGACGTCCTCCAAACATACATGCTAGACTTGGCTACTTCTGAGGATGTTGCGGTGCGATGCGTTTGCGAGTGTGTCTGCCGACGCTGCAACCAAAGTGC
GGGTAGCGCTAGGTTGACGCGTCAATCGTCCGGGACGTCCTCCAAACAAAATTGGTAACATTTGCTTGGACAAGGGACCAAGCTGTGCGATGCGTTTGCGAGTGTGTCTGCCGACGCTGCAACCAAAGTGC
GGGTAGCGCTAGGTTGACGCGTCAATCGTCCGGGACGTCCTCCAAACACCTGCTTGCAACCATGTTTTAAACAACTGTACCACAGTGCGATGCGTTTGCGAGTGTGTCTGCCGACGCTGCAACCAAAGTGC
GGGTAGCGCTAGGTTGACGCGTCAATCGTCCGGGACGTCCTCCAAACTTTTCTTTCCTTGGTGGCTTCAGATTGTCACCAAACGGTGCGATGCGTTTGCGAGTGTGTCTGCCGACGCTGCAACCAAAGTGC
GGGTAGCGCTAGGTTGACGCGTCAATCGTCCGGGACGTCCTCCAAACTCACTGGGCATTCAAGTCCTCCGACCGTATGTGCGATGCGTTTGCGAGTGTGTCTGCCGACGCTGCAACCAAAGTGC
GGGTAGCGCTAGGTTGACGCGTCAATCGTCCGGGACGTCCTCCAAACTAACTGCTATGGATGGTTGTTGCTGAAACTCAGAGGAGTGCGATGCGTTTGCGAGTGTGTCTGCCGACGCTGCAACCAAAGTGC
GGGTAGCGCTAGGTTGACGCGTCAATCGTCCGGGACGTCCTCCAAACCAGAAGATGCCATCACAAGTGATCCTGTCCATTGGGTGCGATGCGTTTGCGAGTGTGTCTGCCGACGCTGCAACCAAAGTGC
GGGTAGCGCTAGGTTGACGCGTCAATCGTCCGGGACGTCCTCCAAACTCAATGGTATGACTTGTGATGCTGCCATTGGTCAATCGTGCGATGCGTTTGCGAGTGTGTCTGCCGACGCTGCAACCAAAGTGC
GGGTAGCGCTAGGTTGACGCGTCAATCGTCCGGGACGTCCTCCAAACATATATACCAGGTCAACAATGCCCATGGTCAACACCTGTGCGATGCGTTTGCGAGTGTGTCTGCCGACGCTGCAACCAAAGTGC
GGGTAGCGCTAGGTTGACGCGTCAATCGTCCGGGACGTCCTCCAAACAATTGCACAGTATGCAAAGTCAGAGGCAGAGTTCTCTGTGCGATGCGTTTGCGAGTGTGTCTGCCGACGCTGCAACCAAAGTGC
GGGTAGCGCTAGGTTGACGCGTCAATCGTCCGGGACGTCCTCCAAACTAATTTGGCTTGGACCATTCTGGTACAAAGGTCCAGTGTGCGATGCGTTTGCGAGTGTGTCTGCCGACGCTGCAACCAAAGTGC
GGGTAGCGCTAGGTTGACGCGTCAATCGTCCGGGACGTCCTCCAAACAGCAGATATTAGGATAGGCAGCTGAGTAGAGGCAACTGTGCGATGCGTTTGCGAGTGTGTCTGCCGACGCTGCAACCAAAGTGC
GGGTAGCGCTAGGTTGACGCGTCAATCGTCCGGGACGTCCTCCAAACACTGACTGTAGGTAGAGGACTTGAGAAGCCAGTTCAGTGCGATGCGTTTGCGAGTGTGTCTGCCGACGCTGCAACCAAAGTGC
GGGTAGCGCTAGGTTGACGCGTCAATCGTCCGGGACGTCCTCCAAACTCACCCTAGGCCACAACCATGGGGCCAGATGTGCGATGCGTTTGCGAGTGTGTCTGCCGACGCTGCAACCAAAGTGC
GGGTAGCGCTAGGTTGACGCGTCAATCGTCCGGGACGTCCTCCAAACCTAAGGAGTAGCCATGGGAGCAGAAAGGAAGAGAGTGTGCGATGCGTTTGCGAGTGTGTCTGCCGACGCTGCAACCAAAGTGC
GGGTAGCGCTAGGTTGACGCGTCAATCGTCCGGGACGTCCTCCAAACGAGCTGAGAGACGTTAAGGAGATAGAGTCAACCACCTGTGCGATGCGTTTGCGAGTGTGTCTGCCGACGCTGCAACCAAAGTGC
GGGTAGCGCTAGGTTGACGCGTCAATCGTCCGGGACGTCCTCCAAACGGGAGCTAGAGGGAGTAGGGAAGGAATCAGAGAGTGCGATGCGTTTGCGAGTGTGTCTGCCGACGCTGCAACCAAAGTGC
GGGTAGCGCTAGGTTGACGCGTCAATCGTCCGGGACGTCCTCCAAACAGAAGGATTCTCCATGATCTGGCTTACCTACTTGGGTGTGCGATGCGTTTGCGAGTGTGTCTGCCGACGCTGCAACCAAAGTGC
GGGTAGCGCTAGGTTGACGCGTCAATCGTCCGGGACGTCCTCCAAACGGGGTAGTCTTGGAGAATTCACAGGATGAGAAGAGCGTGCGATGCGTTTGCGAGTGTGTCTGCCGACGCTGCAACCAAAGTGC
GGGTAGCGCTAGGTTGACGCGTCAATCGTCCGGGACGTCCTCCAAACAATGGGACCAAGAGGGCGTCCCAAGGAATGGTGCGATGCGTTTGCGAGTGTGTCTGCCGACGCTGCAACCAAAGTGC
GGGTAGCGCTAGGTTGACGCGTCAATCGTCCGGGACGTCCTCCAAACTTGCGATGGGACCAAAGACGAGATAAATGGAAATGGAGTGCGATGCGTTTGCGAGTGTGTCTGCCGACGCTGCAACCAAAGTGC
GGGTAGCGCTAGGTTGACGCGTCAATCGTCCGGGACGTCCTCCAAACTGCCTCATCATTACAACAGCAATTGCCACATATGGACGTGCGATGCGTTTGCGAGTGTGTCTGCCGACGCTGCAACCAAAGTGC
GGGTAGCGCTAGGTTGACGCGTCAATCGTCCGGGACGTCCTCCAAACAAAGTGGTTTTCTCTGCAGGTAGAATTACGAGGCACCGTGCGATGCGTTTGCGAGTGTGTCTGCCGACGCTGCAACCAAAGTGC
GGGTAGCGCTAGGTTGACGCGTCAATCGTCCGGGACGTCCTCCAAACTCTTTGGCCAACATGTAGAACAAGTTTTGTGAGGTCGGTGCGATGCGTTTGCGAGTGTGTCTGCCGACGCTGCAACCAAAGTGC
GGGTAGCGCTAGGTTGACGCGTCAATCGTCCGGGACGTCCTCCAAACGCCACACCCCGGAACAGCCATGGAAGCTTCGTGCGATGCGTTTGCGAGTGTGTCTGCCGACGCTGCAACCAAAGTGC
GGGTAGCGCTAGGTTGACGCGTCAATCGTCCGGGACGTCCTCCAAACAACCGCAGAGAATCGAGGGATTAATAACAAAGGCTCCGTGCGATGCGTTTGCGAGTGTGTCTGCCGACGCTGCAACCAAAGTGC
GGGTAGCGCTAGGTTGACGCGTCAATCGTCCGGGACGTCCTCCAAACTGTAGTATCAAGAATAGAGGGTTTCCTGCCCACTCCTGTGCGATGCGTTTGCGAGTGTGTCTGCCGACGCTGCAACCAAAGTGC
GGGTAGCGCTAGGTTGACGCGTCAATCGTCCGGGACGTCCTCCAAACACTCCCACCTCCTTGCTCAGCTCACAGTCAGTGCGATGCGTTTGCGAGTGTGTCTGCCGACGCTGCAACCAAAGTGC
GGGTAGCGCTAGGTTGACGCGTCAATCGTCCGGGACGTCCTCCAAACCCCAAGCACGCACACACAGCTCTGCCATGCGTGCGATGCGTTTGCGAGTGTGTCTGCCGACGCTGCAACCAAAGTGC
GGGTAGCGCTAGGTTGACGCGTCAATCGTCCGGGACGTCCTCCAAACTCCTGTGTGCAGTTTGCAAGGTATTAAACCCTCAGAGTGCGATGCGTTTGCGAGTGTGTCTGCCGACGCTGCAACCAAAGTGC
GGGTAGCGCTAGGTTGACGCGTCAATCGTCCGGGACGTCCTCCAAACGCCAACTCCATCAGGGCTGCTTGAGGATTCGTGCGATGCGTTTGCGAGTGTGTCTGCCGACGCTGCAACCAAAGTGC
GGGTAGCGCTAGGTTGACGCGTCAATCGTCCGGGACGTCCTCCAAACTGTACAATTGTCCTGCTTGAAGACAATCCAGAGAGCTGTGCGATGCGTTTGCGAGTGTGTCTGCCGACGCTGCAACCAAAGTGC
GGGTAGCGCTAGGTTGACGCGTCAATCGTCCGGGACGTCCTCCAAACCACATGCTCCTCATGCCTCCTGGCAAATTAGGGTGCGATGCGTTTGCGAGTGTGTCTGCCGACGCTGCAACCAAAGTGC
GGGTAGCGCTAGGTTGACGCGTCAATCGTCCGGGACGTCCTCCAAACGGGTGAAAAGGAGCATCGTGTATCATCCAGCTCCGTGCGATGCGTTTGCGAGTGTGTCTGCCGACGCTGCAACCAAAGTGC
GGGTAGCGCTAGGTTGACGCGTCAATCGTCCGGGACGTCCTCCAAACAAGCACGTAAGGGCCAACTGCTGCTTCCCTGTGCGATGCGTTTGCGAGTGTGTCTGCCGACGCTGCAACCAAAGTGC
GGGTAGCGCTAGGTTGACGCGTCAATCGTCCGGGACGTCCTCCAAACCAGGAATAGGAGCTCTATCGGCTCAGACACAGGGTGCGATGCGTTTGCGAGTGTGTCTGCCGACGCTGCAACCAAAGTGC
GGGTAGCGCTAGGTTGACGCGTCAATCGTCCGGGACGTCCTCCAAACTGAGATCACAGGCAGACTTCATATTTGAAGGGAAGGCGTGCGATGCGTTTGCGAGTGTGTCTGCCGACGCTGCAACCAAAGTGC
GGGTAGCGCTAGGTTGACGCGTCAATCGTCCGGGACGTCCTCCAAACAGGACATGAGAGCACTGGTGTGTGGTTGGAGTGCGATGCGTTTGCGAGTGTGTCTGCCGACGCTGCAACCAAAGTGC
GGGTAGCGCTAGGTTGACGCCGACGCTGCAACCAAAGTGC
GGGTAGCGCTAGGTTGACGCGTCAATCGTCCGGGACGTCCTCCAAACATCTGGAATATACTGTGCAGGAGAGCTGAACAAAGCAGGTACAGCGGTGGCTCCAAGTTTCCGCCGACGCTGCAACCAAAGTGC
GGGTAGCGCTAGGTTGACGCGTCAATCGTCCGGGACGTCCTCCAAACGGACTCTACAGTCAAGGGGCTGCAGCTTGCGGTACAGCGGTGGCTCCAAGTTTCCGCCGACGCTGCAACCAAAGTGC
GGGTAGCGCTAGGTTGACGCGTCAATCGTCCGGGACGTCCTCCAAACAACCATTCATGTGATTTGGCCTGTACTAAAGGGAGCCGGTACAGCGGTGGCTCCAAGTTTCCGCCGACGCTGCAACCAAAGTGC
GGGTAGCGCTAGGTTGACGCGTCAATCGTCCGGGACGTCCTCCAAACTTCTCTATCTCATCAAGGCTGCACATCATTGCAAGGTGGTACAGCGGTGGCTCCAAGTTTCCGCCGACGCTGCAACCAAAGTGC
GGGTAGCGCTAGGTTGACGCGTCAATCGTCCGGGACGTCCTCCAAACTTGAAGGAGGGATATCGGATACTTGCACTATCTCCCTGGTACAGCGGTGGCTCCAAGTTTCCGCCGACGCTGCAACCAAAGTGC
GGGTAGCGCTAGGTTGACGCGTCAATCGTCCGGGACGTCCTCCAAACCCCCATTTTCACAGCTCCTGATGGAGCCATGGTACAGCGGTGGCTCCAAGTTTCCGCCGACGCTGCAACCAAAGTGC
GGGTAGCGCTAGGTTGACGCGTCAATCGTCCGGGACGTCCTCCAAACGTGAGTGAAGGTGTGCATGTGAGTGAGGCTGGTACAGCGGTGGCTCCAAGTTTCCGCCGACGCTGCAACCAAAGTGC
GGGTAGCGCTAGGTTGACGCGTCAATCGTCCGGGACGTCCTCCAAACCCCAAGAGAACCTACTCTTCATATGCAAACCTGGAGGGGTACAGCGGTGGCTCCAAGTTTCCGCCGACGCTGCAACCAAAGTGC
GGGTAGCGCTAGGTTGACGCGTCAATCGTCCGGGACGTCCTCCAAACGGACCCCGCACAGCAGGAAACAGGCCACTTAGGTACAGCGGTGGCTCCAAGTTTCCGCCGACGCTGCAACCAAAGTGC
GGGTAGCGCTAGGTTGACGCGTCAATCGTCCGGGACGTCCTCCAAACTTCAGAAAATCTTTTCAATGTGGGTGCCAAACAGCCAGGTACAGCGGTGGCTCCAAGTTTCCGCCGACGCTGCAACCAAAGTGC
GGGTAGCGCTAGGTTGACGCGTCAATCGTCCGGGACGTCCTCCAAACAATGAGCCACTACCAGAGAAATCATTTCACTGCCACAGGTACAGCGGTGGCTCCAAGTTTCCGCCGACGCTGCAACCAAAGTGC
GGGTAGCGCTAGGTTGACGCGTCAATCGTCCGGGACGTCCTCCAAACAATTGCGCATGCTTAACTCTAGTGGTGTTTCTATGGCGGTACAGCGGTGGCTCCAAGTTTCCGCCGACGCTGCAACCAAAGTGC
GGGTAGCGCTAGGTTGACGCGTCAATCGTCCGGGACGTCCTCCAAACATACATTTGATTGGCCTAGTTTCACAAGCACCTTGGCGGTACAGCGGTGGCTCCAAGTTTCCGCCGACGCTGCAACCAAAGTGC
GGGTAGCGCTAGGTTGACGCGTCAATCGTCCGGGACGTCCTCCAAACAAAATCAGCCACATATGAAACCAGTGTGCATGCAAGGGGTACAGCGGTGGCTCCAAGTTTCCGCCGACGCTGCAACCAAAGTGC
GGGTAGCGCTAGGTTGACGCGTCAATCGTCCGGGACGTCCTCCAAACGGGGAGGCTGCTATGACTTGGAAAGGCCAGGGTACAGCGGTGGCTCCAAGTTTCCGCCGACGCTGCAACCAAAGTGC
GGGTAGCGCTAGGTTGACGCGTCAATCGTCCGGGACGTCCTCCAAACAAGGTTGCACTTTTAAGGACTAGCCCCTTAGACTGGGGTACAGCGGTGGCTCCAAGTTTCCGCCGACGCTGCAACCAAAGTGC
GGGTAGCGCTAGGTTGACGCGTCAATCGTCCGGGACGTCCTCCAAACGGTTACCACTTTTGACATTTATGTAGCTGCCACCAGGGGTACAGCGGTGGCTCCAAGTTTCCGCCGACGCTGCAACCAAAGTGC
GGGTAGCGCTAGGTTGACGCGTCAATCGTCCGGGACGTCCTCCAAACGCCTCAGGCTCCGTGGGACAGCCAACTGAGGGTACAGCGGTGGCTCCAAGTTTCCGCCGACGCTGCAACCAAAGTGC
GGGTAGCGCTAGGTTGACGCGTCAATCGTCCGGGACGTCCTCCAAACTGAGGCTCCTCAGATCTAGAGTCAGAATCTCTTGCTGGGTACAGCGGTGGCTCCAAGTTTCCGCCGACGCTGCAACCAAAGTGC
GGGTAGCGCTAGGTTGACGCGTCAATCGTCCGGGACGTCCTCCAAACTCAGTTGAACTTTGGCATGTAACTCTCAGCTGGCGGTACAGCGGTGGCTCCAAGTTTCCGCCGACGCTGCAACCAAAGTGC
GGGTAGCGCTAGGTTGACGCGTCAATCGTCCGGGACGTCCTCCAAACTACTGATTTCAGAGGAAGCTGGAGGTGCCCAGGTACAGCGGTGGCTCCAAGTTTCCGCCGACGCTGCAACCAAAGTGC
GGGTAGCGCTAGGTTGACGCGTCAATCGTCCGGGACGTCCTCCAAACTGAACTTTGGCATCTAACTAACTCTCAGCTGGTCACGGGTACAGCGGTGGCTCCAAGTTTCCGCCGACGCTGCAACCAAAGTGC
GGGTAGCGCTAGGTTGACGCGTCAATCGTCCGGGACGTCCTCCAAACGATTTGAGAGGAAGCTGGAGGTGCCCCTCAGGTACAGCGGTGGCTCCAAGTTTCCGCCGACGCTGCAACCAAAGTGC
GGGTAGCGCTAGGTTGACGCGTCAATCGTCCGGGACGTCCTCCAAACAGCTAATGTGTAGTGAGTGTTTGCTGTGTACAGGTGGGGTACAGCGGTGGCTCCAAGTTTCCGCCGACGCTGCAACCAAAGTGC
GGGTAGCGCTAGGTTGACGCGTCAATCGTCCGGGACGTCCTCCAAACAGAACTTGTACAACTAAAGGGGCTTGGAGAAGTGGTGGTACAGCGGTGGCTCCAAGTTTCCGCCGACGCTGCAACCAAAGTGC
GGGTAGCGCTAGGTTGACGCGTCAATCGTCCGGGACGTCCTCCAAACTCTCAACTGGTTCTTGCAGAGACACCTCCAATGGGGTACAGCGGTGGCTCCAAGTTTCCGCCGACGCTGCAACCAAAGTGC
GGGTAGCGCTAGGTTGACGCGTCAATCGTCCGGGACGTCCTCCAAACACTACAACTTTCCGAAGAGCTAAAGTAGTGCCCACAGGTACAGCGGTGGCTCCAAGTTTCCGCCGACGCTGCAACCAAAGTGC
GGGTAGCGCTAGGTTGACGCGTCAATCGTCCGGGACGTCCTCCAAACAAGTGCAGGCTACAAGCTCGGCTGTACCAGGGTACAGCGGTGGCTCCAAGTTTCCGCCGACGCTGCAACCAAAGTGC
GGGTAGCGCTAGGTTGACGCGTCAATCGTCCGGGACGTCCTCCAAACACTTAACTTCTCTTCAAAGTCCCATTCAGGTGGGTGGGGTACAGCGGTGGCTCCAAGTTTCCGCCGACGCTGCAACCAAAGTGC
GGGTAGCGCTAGGTTGACGCGTCAATCGTCCGGGACGTCCTCCAAACTAGAATGGGGCCAACTTCAGGCACTTGTAATCAAGAGGTACAGCGGTGGCTCCAAGTTTCCGCCGACGCTGCAACCAAAGTGC
GGGTAGCGCTAGGTTGACGCGTCAATCGTCCGGGACGTCCTCCAAACTCTATTGCTACCATTACTTTTCTGCCACCAGAGTGGGGGTACAGCGGTGGCTCCAAGTTTCCGCCGACGCTGCAACCAAAGTGC
GGGTAGCGCTAGGTTGACGCGTCAATCGTCCGGGACGTCCTCCAAACGAGGAAGGAAGCTGGTCCTGTGTCATCACCTGGTACAGCGGTGGCTCCAAGTTTCCGCCGACGCTGCAACCAAAGTGC
GGGTAGCGCTAGGTTGACGCGTCAATCGTCCGGGACGTCCTCCAAACCACCTGTTCATTCTCTCATCCACTGAGATGTGCTCCGGTACAGCGGTGGCTCCAAGTTTCCGCCGACGCTGCAACCAAAGTGC
GGGTAGCGCTAGGTTGACGCGTCAATCGTCCGGGACGTCCTCCAAACTTCCTGAATGATCTTTGACTGTCCATGCCCACAGGGGTACAGCGGTGGCTCCAAGTTTCCGCCGACGCTGCAACCAAAGTGC
GGGTAGCGCTAGGTTGACGCGTCAATCGTCCGGGACGTCCTCCAAACCATGGCTCCATTTCAATCACGTTTGAGCCTCTCTGGTACAGCGGTGGCTCCAAGTTTCCGCCGACGCTGCAACCAAAGTGC
GGGTAGCGCTAGGTTGACGCGTCAATCGTCCGGGACGTCCTCCAAACAGTACAGAACAAATTGGAGTGGTCTCCCATAACTCGCGGTACAGCGGTGGCTCCAAGTTTCCGCCGACGCTGCAACCAAAGTGC
GGGTAGCGCTAGGTTGACGCGTCAATCGTCCGGGACGTCCTCCAAACTGTGGCCATGGGAAATTCTGGATGCTGTCAGGTACAGCGGTGGCTCCAAGTTTCCGCCGACGCTGCAACCAAAGTGC
GGGTAGCGCTAGGTTGACGCGTCAATCGTCCGGGACGTCCTCCAAACTACAACCTTTCTGCCAAGATAGGTCACAGGTCACAGGTACAGCGGTGGCTCCAAGTTTCCGCCGACGCTGCAACCAAAGTGC
GGGTAGCGCTAGGTTGACGCGTCAATCGTCCGGGACGTCCTCCAAACTTTTGCCAGACATAGGGCAAGGAGGAGGCAGGTACAGCGGTGGCTCCAAGTTTCCGCCGACGCTGCAACCAAAGTGC
GGGTAGCGCTAGGTTGACGCGTCAATCGTCCGGGACGTCCTCCAAACGATTTCCAAAAGTTTGCCATCTTTCTGGACTGCACCAGGTACAGCGGTGGCTCCAAGTTTCCGCCGACGCTGCAACCAAAGTGC
GGGTAGCGCTAGGTTGACGCGTCAATCGTCCGGGACGTCCTCCAAACTCCACAGTCCTCACTCAGCCAACCCAGGGCGGTACAGCGGTGGCTCCAAGTTTCCGCCGACGCTGCAACCAAAGTGC
GGGTAGCGCTAGGTTGACGCGTCAATCGTCCGGGACGTCCTCCAAACTCCATTTAGGAGAGTCTCAGGGAATAGGCCCTCCGGTACAGCGGTGGCTCCAAGTTTCCGCCGACGCTGCAACCAAAGTGC
GGGTAGCGCTAGGTTGACGCGTCAATCGTCCGGGACGTCCTCCAAACTTAGGAACACACCAACATTTACCCCTTCTCTTTCCCAGGTACAGCGGTGGCTCCAAGTTTCCGCCGACGCTGCAACCAAAGTGC
GGGTAGCGCTAGGTTGACGCGTCAATCGTCCGGGACGTCCTCCAAACTTTTCATTCCCAGTCTGGCTGGGAGCTAGAAACAGGTACAGCGGTGGCTCCAAGTTTCCGCCGACGCTGCAACCAAAGTGC
GGGTAGCGCTAGGTTGACGCGTCAATCGTCCGGGACGTCCTCCAAACTTGGCTTTGCCTGCCCACGTTGTCATCCAAGGTACAGCGGTGGCTCCAAGTTTCCGCCGACGCTGCAACCAAAGTGC
GGGTAGCGCTAGGTTGACGCGTCAATCGTCCGGGACGTCCTCCAAACCAAAACCAAAAGCCAGGCTCTACTTCTCCAGTTATGCGGTACAGCGGTGGCTCCAAGTTTCCGCCGACGCTGCAACCAAAGTGC
GGGTAGCGCTAGGTTGACGCGTCAATCGTCCGGGACGTCCTCCAAACAGATAATCATGGCTTCTTGCCTAGTGCTGAACTGAGGGGTACAGCGGTGGCTCCAAGTTTCCGCCGACGCTGCAACCAAAGTGC
GGGTAGCGCTAGGTTGACGCGTCAATCGTCCGGGACGTCCTCCAAACTACATTACAGAGAATTCACTCCCTCTCGCATCTCCCAGGTACAGCGGTGGCTCCAAGTTTCCGCCGACGCTGCAACCAAAGTGC
GGGTAGCGCTAGGTTGACGCGTCAATCGTCCGGGACGTCCTCCAAACAAGCGCCTGCCAGCACTGTTTCCCAAGGATGGTACAGCGGTGGCTCCAAGTTTCCGCCGACGCTGCAACCAAAGTGC
GGGTAGCGCTAGGTTGACGCGTCAATCGTCCGGGACGTCCTCCAAACTCGACCACTTGTTTCCAGCACTCGCCCAATGGTACAGCGGTGGCTCCAAGTTTCCGCCGACGCTGCAACCAAAGTGC
GGGTAGCGCTAGGTTGACGCGTCAATCGTCCGGGACGTCCTCCAAACTCCTTAGGAGGTGAAGACTCAGCATGGCTTCAGGTACAGCGGTGGCTCCAAGTTTCCGCCGACGCTGCAACCAAAGTGC
GGGTAGCGCTAGGTTGACGCGTCAATCGTCCGGGACGTCCTCCAAACGTGAATGCCTCAAGAGTGGGCACAGGGCTCGGTACAGCGGTGGCTCCAAGTTTCCGCCGACGCTGCAACCAAAGTGC
GGGTAGCGCTAGGTTGACGCGTCAATCGTCCGGGACGTCCTCCAAACAGATCAAAAGATGCGAACGTGCTGTAATGCCTGTGGTACAGCGGTGGCTCCAAGTTTCCGCCGACGCTGCAACCAAAGTGC
GGGTAGCGCTAGGTTGACGCGTCAATCGTCCGGGACGTCCTCCAAACGGGTTGACCCTCCTGGCCCTTAGGCCACTGGGTACAGCGGTGGCTCCAAGTTTCCGCCGACGCTGCAACCAAAGTGC
GGGTAGCGCTAGGTTGACGCGTCAATCGTCCGGGACGTCCTCCAAACATTCTAAACACATCTGAGTTGGTGTCATGCCGTGTCTGGTACAGCGGTGGCTCCAAGTTTCCGCCGACGCTGCAACCAAAGTGC
GGGTAGCGCTAGGTTGACGCGTCAATCGTCCGGGACGTCCTCCAAACAGATTTGAGATCCCCTACAAAGGCCAAGGAAAAGGTGGTACAGCGGTGGCTCCAAGTTTCCGCCGACGCTGCAACCAAAGTGC
GGGTAGCGCTAGGTTGACGCGTCAATCGTCCGGGACGTCCTCCAAACATTCTGGAGTCCTAGAGTAACCAGTGCCTTAGACACAGGTACAGCGGTGGCTCCAAGTTTCCGCCGACGCTGCAACCAAAGTGC
GGGTAGCGCTAGGTTGACGCGTCAATCGTCCGGGACGTCCTCCAAACAGAGAATGTGCTCCATGCACATAGAAAACCAGAAGGGGGTACAGCGGTGGCTCCAAGTTTCCGCCGACGCTGCAACCAAAGTGC
GGGTAGCGCTAGGTTGACGCGTCAATCGTCCGGGACGTCCTCCAAACACAAGGCAAATATTCCTTAAAGCAGGTTGGTTTGGCAGGTACAGCGGTGGCTCCAAGTTTCCGCCGACGCTGCAACCAAAGTGC
GGGTAGCGCTAGGTTGACGCGTCAATCGTCCGGGACGTCCTCCAAACAGTGCACACAAAGGAACAGTGGTAAATGACACAATGGGGTACAGCGGTGGCTCCAAGTTTCCGCCGACGCTGCAACCAAAGTGC
GGGTAGCGCTAGGTTGACGCGTCAATCGTCCGGGACGTCCTCCAAACTGTGTTGGTGTTGTCATTAACACACATGGGAACATGTGGTACAGCGGTGGCTCCAAGTTTCCGCCGACGCTGCAACCAAAGTGC
GGGTAGCGCTAGGTTGACGCGTCAATCGTCCGGGACGTCCTCCAAACACTCATGCGCACACACAAGCCACGCAACTCGGTACAGCGGTGGCTCCAAGTTTCCGCCGACGCTGCAACCAAAGTGC
GGGTAGCGCTAGGTTGACGCGTCAATCGTCCGGGACGTCCTCCAAACAGCAACTAGGAAATAGAGTTTGCCGAAGGGAACCTGGTACAGCGGTGGCTCCAAGTTTCCGCCGACGCTGCAACCAAAGTGC
GGGTAGCGCTAGGTTGACGCGTCAATCGTCCGGGACGTCCTCCAAACAAAAGTAAGACTCGCTGGCTCTGCTGTTGTTCAGAGGTACAGCGGTGGCTCCAAGTTTCCGCCGACGCTGCAACCAAAGTGC
GGGTAGCGCTAGGTTGACGCGTCAATCGTCCGGGACGTCCTCCAAACACACAGCAGAAAATGTCTGGAATTGTTGCAGACAGTGGTACAGCGGTGGCTCCAAGTTTCCGCCGACGCTGCAACCAAAGTGC
GGGTAGCGCTAGGTTGACGCGTCAATCGTCCGGGACGTCCTCCAAACTGACAGGAACATTGAATGCTAAGGTACTCACTGTGGGGGTACAGCGGTGGCTCCAAGTTTCCGCCGACGCTGCAACCAAAGTGC
GGGTAGCGCTAGGTTGACGCGTCAATCGTCCGGGACGTCCTCCAAACTGAGTGTAAAGTGCCTGCATCTTCCCATAATGTGTGGGGTACAGCGGTGGCTCCAAGTTTCCGCCGACGCTGCAACCAAAGTGC
GGGTAGCGCTAGGTTGACGCGTCAATCGTCCGGGACGTCCTCCAAACTGCAGCAAACATAGGAAATCTTTGATATTGGGCACGCGGTACAGCGGTGGCTCCAAGTTTCCGCCGACGCTGCAACCAAAGTGC
GGGTAGCGCTAGGTTGACGCGTCAATCGTCCGGGACGTCCTCCAAACAGTTCCACCTTCTAGAGTAGCTGAGTCACAACACTGTGGTACAGCGGTGGCTCCAAGTTTCCGCCGACGCTGCAACCAAAGTGC
GGGTAGCGCTAGGTTGACGCGTCAATCGTCCGGGACGTCCTCCAAACACGGAAATAGACAAATCATTTCAGCACCCCTACCTGAGGTACAGCGGTGGCTCCAAGTTTCCGCCGACGCTGCAACCAAAGTGC
GGGTAGCGCTAGGTTGACGCGTCAATCGTCCGGGACGTCCTCCAAACAACTGCCTCTGGGTAAGCTGAATGTAGGTCACAGGTACAGCGGTGGCTCCAAGTTTCCGCCGACGCTGCAACCAAAGTGC
GGGTAGCGCTAGGTTGACGCGTCAATCGTCCGGGACGTCCTCCAAACACTGATAGGTCTGTGATGAGAGGCCACGATTTCAGGGTACAGCGGTGGCTCCAAGTTTCCGCCGACGCTGCAACCAAAGTGC
GGGTAGCGCTAGGTTGACGCGTCAATCGTCCGGGACGTCCTCCAAACACATATAGATTCCTAGGCCGTCTCTGCATAGTCTCCCGGTACAGCGGTGGCTCCAAGTTTCCGCCGACGCTGCAACCAAAGTGC
GGGTAGCGCTAGGTTGACGCGTCAATCGTCCGGGACGTCCTCCAAACGCTGGCTTTCTGAAGTAGATTGTTTTCTCTGTCAGGCGGTACAGCGGTGGCTCCAAGTTTCCGCCGACGCTGCAACCAAAGTGC
GGGTAGCGCTAGGTTGACGCGTCAATCGTCCGGGACGTCCTCCAAACTGGAAAGTTTAGGAGAGACTGAGGCAGTAGCTAGTGAGGTACAGCGGTGGCTCCAAGTTTCCGCCGACGCTGCAACCAAAGTGC
GGGTAGCGCTAGGTTGACGCGTCAATCGTCCGGGACGTCCTCCAAACTGGGCTTGTAAACCGCCTCCCAGTAAATGGGGTACAGCGGTGGCTCCAAGTTTCCGCCGACGCTGCAACCAAAGTGC
GGGTAGCGCTAGGTTGACGCGTCAATCGTCCGGGACGTCCTCCAAACATGATTGGCCCATGAGTTAGCTCCAGCATAATACTGGGGTACAGCGGTGGCTCCAAGTTTCCGCCGACGCTGCAACCAAAGTGC
GGGTAGCGCTAGGTTGACGCGTCAATCGTCCGGGACGTCCTCCAAACACTCTACCTGTTGGCCTCATGTTCTGATTTCCAAAGGGGTACAGCGGTGGCTCCAAGTTTCCGCCGACGCTGCAACCAAAGTGC
GGGTAGCGCTAGGTTGACGCGTCAATCGTCCGGGACGTCCTCCAAACATAGGGCAGAATGAAACTACGGATGGAGACTAGTGGGGGTACAGCGGTGGCTCCAAGTTTCCGCCGACGCTGCAACCAAAGTGC
GGGTAGCGCTAGGTTGACGCGTCAATCGTCCGGGACGTCCTCCAAACTAAGATGACTCATCCTTTGCTCTTACCTGCCACATGGGGTACAGCGGTGGCTCCAAGTTTCCGCCGACGCTGCAACCAAAGTGC
GGGTAGCGCTAGGTTGACGCGTCAATCGTCCGGGACGTCCTCCAAACCAGGAGTCACAGGATGGGGAGCTGCCTCCTGGTACAGCGGTGGCTCCAAGTTTCCGCCGACGCTGCAACCAAAGTGC
GGGTAGCGCTAGGTTGACGCGTCAATCGTCCGGGACGTCCTCCAAACAAGAGCCTCAGGGTGGGAATGAAACATGACATATGAGGTACAGCGGTGGCTCCAAGTTTCCGCCGACGCTGCAACCAAAGTGC
GGGTAGCGCTAGGTTGACGCGTCAATCGTCCGGGACGTCCTCCAAACTTTAAAGAAGCTTGGCTCTAAGCCTGAGAGCAAAGGGGGTACAGCGGTGGCTCCAAGTTTCCGCCGACGCTGCAACCAAAGTGC
GGGTAGCGCTAGGTTGACGCGTCAATCGTCCGGGACGTCCTCCAAACCTGGGTCTTTCTGTGCCTCCACTTGCCATGGGTACAGCGGTGGCTCCAAGTTTCCGCCGACGCTGCAACCAAAGTGC
GGGTAGCGCTAGGTTGACGCGTCAATCGTCCGGGACGTCCTCCAAACTGCAGAGTCAACATTAGCAAGAAAGTTCATCAGCACGGGTACAGCGGTGGCTCCAAGTTTCCGCCGACGCTGCAACCAAAGTGC
GGGTAGCGCTAGGTTGACGCGTCAATCGTCCGGGACGTCCTCCAAACGCTGAAGAGATCAGTAGCCTGCTTTTAGTCCATGAGTGGTACAGCGGTGGCTCCAAGTTTCCGCCGACGCTGCAACCAAAGTGC
GGGTAGCGCTAGGTTGACGCGTCAATCGTCCGGGACGTCCTCCAAACCAAGCTCATGGGGCAAGTTGGCTTCTCAGAGGTACAGCGGTGGCTCCAAGTTTCCGCCGACGCTGCAACCAAAGTGC
GGGTAGCGCTAGGTTGACGCGTCAATCGTCCGGGACGTCCTCCAAACGACCCCATGTGACCAGACCCATTGGTGCACGGTACAGCGGTGGCTCCAAGTTTCCGCCGACGCTGCAACCAAAGTGC
GGGTAGCGCTAGGTTGACGCGTCAATCGTCCGGGACGTCCTCCAAACACCCTAGCTAGTCCAATGACATAGACTGTTGTTTGGCGGTACAGCGGTGGCTCCAAGTTTCCGCCGACGCTGCAACCAAAGTGC
GGGTAGCGCTAGGTTGACGCGTCAATCGTCCGGGACGTCCTCCAAACATCAGCAGAATCACCTTGGGAAACTGAGTAATGGTGGGGTACAGCGGTGGCTCCAAGTTTCCGCCGACGCTGCAACCAAAGTGC
GGGTAGCGCTAGGTTGACGCGTCAATCGTCCGGGACGTCCTCCAAACTTTGACAGACTGGGCCCTGAGCACACTAACAGGTACAGCGGTGGCTCCAAGTTTCCGCCGACGCTGCAACCAAAGTGC
GGGTAGCGCTAGGTTGACGCGTCAATCGTCCGGGACGTCCTCCAAACAATCCATCCTTGAGCTCCCTAAGTAGCCAACTTCAACGGTACAGCGGTGGCTCCAAGTTTCCGCCGACGCTGCAACCAAAGTGC
GGGTAGCGCTAGGTTGACGCGTCAATCGTCCGGGACGTCCTCCAAACATCAACCAGAGAGAGAACTGAATCACAGTGGGACTTGGGTACAGCGGTGGCTCCAAGTTTCCGCCGACGCTGCAACCAAAGTGC
GGGTAGCGCTAGGTTGACGCGTCAATCGTCCGGGACGTCCTCCAAACTGAGTTCAGAATTCCATGGGGATCCAGAGATGAGACCGGTACAGCGGTGGCTCCAAGTTTCCGCCGACGCTGCAACCAAAGTGC
GGGTAGCGCTAGGTTGACGCGTCAATCGTCCGGGACGTCCTCCAAACTTAACATGCGAAACCTCCCATGTATGTGTTTTGGTGCGGTACAGCGGTGGCTCCAAGTTTCCGCCGACGCTGCAACCAAAGTGC
GGGTAGCGCTAGGTTGACGCGTCAATCGTCCGGGACGTCCTCCAAACAAGGGCTCTCAAACACGGATACACTGAGAATCTCAACGGTACAGCGGTGGCTCCAAGTTTCCGCCGACGCTGCAACCAAAGTGC
GGGTAGCGCTAGGTTGACGCGTCAATCGTCCGGGACGTCCTCCAAACAAAACCACTCGTTGCAGTTCTGCGGTTGGCGGTACAGCGGTGGCTCCAAGTTTCCGCCGACGCTGCAACCAAAGTGC
GGGTAGCGCTAGGTTGACGCGTCAATCGTCCGGGACGTCCTCCAAACAGCAATCCCAGCTCCTGAATACTAGCAAATCTCAAGGGGTACAGCGGTGGCTCCAAGTTTCCGCCGACGCTGCAACCAAAGTGC
GGGTAGCGCTAGGTTGACGCGTCAATCGTCCGGGACGTCCTCCAAACGGCAGTTGTCATGTAACTAAGACTACTCACCAACCCAGGTACAGCGGTGGCTCCAAGTTTCCGCCGACGCTGCAACCAAAGTGC
GGGTAGCGCTAGGTTGACGCGTCAATCGTCCGGGACGTCCTCCAAACTAAAACACTACTGGGCCCTCAACACTATTCTCTCCCCGGTACAGCGGTGGCTCCAAGTTTCCGCCGACGCTGCAACCAAAGTGC
GGGTAGCGCTAGGTTGACGCGTCAATCGTCCGGGACGTCCTCCAAACAGATCAAGTTCATGTGGTTTGATTCACTCCAGTGGGTGGTACAGCGGTGGCTCCAAGTTTCCGCCGACGCTGCAACCAAAGTGC
GGGTAGCGCTAGGTTGACGCGTCAATCGTCCGGGACGTCCTCCAAACAGACTGAGTTATGCAAAATTCCCTGCAAGCTAGCTCTGGTACAGCGGTGGCTCCAAGTTTCCGCCGACGCTGCAACCAAAGTGC
GGGTAGCGCTAGGTTGACGCGTCAATCGTCCGGGACGTCCTCCAAACTTCCCTTCTTTACCATACATCAGTGGTCAGCCATTGAGGTACAGCGGTGGCTCCAAGTTTCCGCCGACGCTGCAACCAAAGTGC
GGGTAGCGCTAGGTTGACGCGTCAATCGTCCGGGACGTCCTCCAAACTGAGTCTGCCTTGGAAATTCTTTGTCCCACATTTGTGGGTACAGCGGTGGCTCCAAGTTTCCGCCGACGCTGCAACCAAAGTGC
GGGTAGCGCTAGGTTGACGCGTCAATCGTCCGGGACGTCCTCCAAACAATATCACAGACTTGGCTCCATTCCATTCTGACAGCTGGTACAGCGGTGGCTCCAAGTTTCCGCCGACGCTGCAACCAAAGTGC
GGGTAGCGCTAGGTTGACGCGTCAATCGTCCGGGACGTCCTCCAAACAACTTTCTGGAGAAGCCAAACGCACTTGATCCAGGTACAGCGGTGGCTCCAAGTTTCCGCCGACGCTGCAACCAAAGTGC
GGGTAGCGCTAGGTTGACGCGTCAATCGTCCGGGACGTCCTCCAAACTACCCCAGAAATTCTCCTTCCTTTTCTTAGCTCGTGCGGTACAGCGGTGGCTCCAAGTTTCCGCCGACGCTGCAACCAAAGTGC
GGGTAGCGCTAGGTTGACGCGTCAATCGTCCGGGACGTCCTCCAAACCAGAGTTTGAAAAGCCCGGAGACTAGAAGCTGCGGTACAGCGGTGGCTCCAAGTTTCCGCCGACGCTGCAACCAAAGTGC
GGGTAGCGCTAGGTTGACGCGTCAATCGTCCGGGACGTCCTCCAAACAGAGCGAGCAGAAATCTCAGACAATCTGTCCTCATCGGTACAGCGGTGGCTCCAAGTTTCCGCCGACGCTGCAACCAAAGTGC
GGGTAGCGCTAGGTTGACGCGTCAATCGTCCGGGACGTCCTCCAAACTTCCTTCTTGAAATCCCGTCATTAACAGAGCACACGGGGTACAGCGGTGGCTCCAAGTTTCCGCCGACGCTGCAACCAAAGTGC
GGGTAGCGCTAGGTTGACGCGTCAATCGTCCGGGACGTCCTCCAAACAAAGATGGATGTAACACTAGGCCAAATTCCTGAGCCCGGTACAGCGGTGGCTCCAAGTTTCCGCCGACGCTGCAACCAAAGTGC
GGGTAGCGCTAGGTTGACGCGTCAATCGTCCGGGACGTCCTCCAAACAATATGCCAGGTCCTCCTTTAAATTTGCACAGCTGGGGTACAGCGGTGGCTCCAAGTTTCCGCCGACGCTGCAACCAAAGTGC
GGGTAGCGCTAGGTTGACGCGTCAATCGTCCGGGACGTCCTCCAAACGTAGTTCCCTCTTTCCCAAAGAGGCATGGAAGTTTCGGGTACAGCGGTGGCTCCAAGTTTCCGCCGACGCTGCAACCAAAGTGC
GGGTAGCGCTAGGTTGACGCGTCAATCGTCCGGGACGTCCTCCAAACATACTTTGACTGAAGGATACCAGGTTCAACTGTGGGCGGTACAGCGGTGGCTCCAAGTTTCCGCCGACGCTGCAACCAAAGTGC
GGGTAGCGCTAGGTTGACGCGTCAATCGTCCGGGACGTCCTCCAAACAAAAGTGAACTTAGGTGCAGCACAATTGGTCCCACTCACGACGGAAGACGCAGCCCAACTCCGACGCTGCAACCAAAGTGC
GGGTAGCGCTAGGTTGACGCGTCAATCGTCCGGGACGTCCTCCAAACACCATTGTGCTGAAACTCTGGATCTCTAAGAGAGCCCTCACGACGGAAGACGCAGCCCAACTCCGACGCTGCAACCAAAGTGC
GGGTAGCGCTAGGTTGACGCGTCAATCGTCCGGGACGTCCTCCAAACCTGAATTCGTCGAGAGGGATGCCAGTAGGATGGCTCACGACGGAAGACGCAGCCCAACTCCGACGCTGCAACCAAAGTGC
GGGTAGCGCTAGGTTGACGCGTCAATCGTCCGGGACGTCCTCCAAACAACATGTGGTGGAGAAGGCAACTGTCCAGGCTCACGACGGAAGACGCAGCCCAACTCCGACGCTGCAACCAAAGTGC
GGGTAGCGCTAGGTTGACGCGTCAATCGTCCGGGACGTCCTCCAAACTTTGAAACTGGAAGAGTTGCCTCAGCAAATTTGTGGACTCACGACGGAAGACGCAGCCCAACTCCGACGCTGCAACCAAAGTGC
GGGTAGCGCTAGGTTGACGCGTCAATCGTCCGGGACGTCCTCCAAACTATTGTCTTCAGAATCTTCCCGCAAAGGCAGAGGACTCACGACGGAAGACGCAGCCCAACTCCGACGCTGCAACCAAAGTGC
GGGTAGCGCTAGGTTGACGCGTCAATCGTCCGGGACGTCCTCCAAACTTATACCAGCAGCTGGAGAAGTCAGTAGGGATACAGCCTCACGACGGAAGACGCAGCCCAACTCCGACGCTGCAACCAAAGTGC
GGGTAGCGCTAGGTTGACGCGTCAATCGTCCGGGACGTCCTCCAAACTTTCTGTGATTGCAGAGCTTATTGCTTCAAACTGGCCCTCACGACGGAAGACGCAGCCCAACTCCGACGCTGCAACCAAAGTGC
GGGTAGCGCTAGGTTGACGCGTCAATCGTCCGGGACGTCCTCCAAACAAGACATGGGGTTCCCAGGTTTAACGTAACTGATTCTCTCACGACGGAAGACGCAGCCCAACTCCGACGCTGCAACCAAAGTGC
GGGTAGCGCTAGGTTGACGCGTCAATCGTCCGGGACGTCCTCCAAACTTTTGAGCCTAAATCCTCAAAAGGCCAATAGGCCTCACTCACGACGGAAGACGCAGCCCAACTCCGACGCTGCAACCAAAGTGC
GGGTAGCGCTAGGTTGACGCGTCAATCGTCCGGGACGTCCTCCAAACCTGCTCTACTCAGCCCTGTGTACAGCAGTTCTCTCACGACGGAAGACGCAGCCCAACTCCGACGCTGCAACCAAAGTGC
GGGTAGCGCTAGGTTGACGCGTCAATCGTCCGGGACGTCCTCCAAACCCACTGAGGAGCCACAGTGACTTGATTTGCCCTCACGACGGAAGACGCAGCCCAACTCCGACGCTGCAACCAAAGTGC
GGGTAGCGCTAGGTTGACGCGTCAATCGTCCGGGACGTCCTCCAAACTGCTTTGTTGCTTCTGATATTCCAGAGGTTTCCCAGTCTCACGACGGAAGACGCAGCCCAACTCCGACGCTGCAACCAAAGTGC
GGGTAGCGCTAGGTTGACGCGTCAATCGTCCGGGACGTCCTCCAAACAAGTTTAGTGACTCCTCTGCCTACCAGTAACCAAGGGCTCACGACGGAAGACGCAGCCCAACTCCGACGCTGCAACCAAAGTGC
GGGTAGCGCTAGGTTGACGCGTCAATCGTCCGGGACGTCCTCCAAACGACACTGGGAAATAACCAAATCTAGCTAGCTCCTGGTCTCACGACGGAAGACGCAGCCCAACTCCGACGCTGCAACCAAAGTGC
GGGTAGCGCTAGGTTGACGCGTCAATCGTCCGGGACGTCCTCCAAACATAGTCCCTGGTAGTGCTGGTCGCAGAAAATTCACTCACGACGGAAGACGCAGCCCAACTCCGACGCTGCAACCAAAGTGC
GGGTAGCGCTAGGTTGACGCGTCAATCGTCCGGGACGTCCTCCAAACATCCAGCCACAAATATGGATGAGTCACTCGTTTTGGCCTCACGACGGAAGACGCAGCCCAACTCCGACGCTGCAACCAAAGTGC
GGGTAGCGCTAGGTTGACGCGTCAATCGTCCGGGACGTCCTCCAAACTCAGCTGTGTGTATACAGTTGCCTAAAAGCTCACACCCTCACGACGGAAGACGCAGCCCAACTCCGACGCTGCAACCAAAGTGC
GGGTAGCGCTAGGTTGACGCGTCAATCGTCCGGGACGTCCTCCAAACTTCCAGATGGCAGCCTGGATTTCTAAGGAGGACTCACGACGGAAGACGCAGCCCAACTCCGACGCTGCAACCAAAGTGC
GGGTAGCGCTAGGTTGACGCGTCAATCGTCCGGGACGTCCTCCAAACACAATCCTGAGAGGTCATTCTTTTCCTCTGTTCTGGGCTCACGACGGAAGACGCAGCCCAACTCCGACGCTGCAACCAAAGTGC
GGGTAGCGCTAGGTTGACGCGTCAATCGTCCGGGACGTCCTCCAAACTCATCTTAGATGGAGACACTAAAACAGCACCACCTGGCTCACGACGGAAGACGCAGCCCAACTCCGACGCTGCAACCAAAGTGC
GGGTAGCGCTAGGTTGACGCGTCAATCGTCCGGGACGTCCTCCAAACAAAAGCAGGTTAAATAAGAACTGCACGGTGTTTGCCGCTCACGACGGAAGACGCAGCCCAACTCCGACGCTGCAACCAAAGTGC
GGGTAGCGCTAGGTTGACGCGTCAATCGTCCGGGACGTCCTCCAAACTACCAACAGCTGGAGTAGTGAGATCATGATGAGTCCTCTCACGACGGAAGACGCAGCCCAACTCCGACGCTGCAACCAAAGTGC
GGGTAGCGCTAGGTTGACGCGTCAATCGTCCGGGACGTCCTCCAAACCTGGATTCCACCAAGTTCTCTCAGCTTGGGAGTCTCACGACGGAAGACGCAGCCCAACTCCGACGCTGCAACCAAAGTGC
GGGTAGCGCTAGGTTGACGCGTCAATCGTCCGGGACGTCCTCCAAACAACCACCAAATCCACATGCAGTTAAAAGCGACTGACTCACGACGGAAGACGCAGCCCAACTCCGACGCTGCAACCAAAGTGC
GGGTAGCGCTAGGTTGACGCGTCAATCGTCCGGGACGTCCTCCAAACATACTGGATAATGGGGAAAATCACTGCCAAGTCAGCACTCACGACGGAAGACGCAGCCCAACTCCGACGCTGCAACCAAAGTGC
GGGTAGCGCTAGGTTGACGCGTCAATCGTCCGGGACGTCCTCCAAACCCGGCACAGCAGAGAATCCTTCCTCACATCCTCACGACGGAAGACGCAGCCCAACTCCGACGCTGCAACCAAAGTGC
GGGTAGCGCTAGGTTGACGCGTCAATCGTCCGGGACGTCCTCCAAACAAGGCACTATTATCATAGGTGGAGAAGAGCCACTCCCCTCACGACGGAAGACGCAGCCCAACTCCGACGCTGCAACCAAAGTGC
GGGTAGCGCTAGGTTGACGCGTCAATCGTCCGGGACGTCCTCCAAACAAGTCATTCTTCCAGACACATTTGCAAATCTGGCACACTCACGACGGAAGACGCAGCCCAACTCCGACGCTGCAACCAAAGTGC
GGGTAGCGCTAGGTTGACGCGTCAATCGTCCGGGACGTCCTCCAAACTATTCACCATACAGCAGTGCCTCCTTTGTGACATTGACTCACGACGGAAGACGCAGCCCAACTCCGACGCTGCAACCAAAGTGC
GGGTAGCGCTAGGTTGACGCGTCAATCGTCCGGGACGTCCTCCAAACAGATTTCTCACGTACATCCAACTTCTCTTGCTCTCCCCTCACGACGGAAGACGCAGCCCAACTCCGACGCTGCAACCAAAGTGC
GGGTAGCGCTAGGTTGACGCGTCAATCGTCCGGGACGTCCTCCAAACCCGGGCTGTTTCTGTACGTCTTCACTTGTGTCTCACGACGGAAGACGCAGCCCAACTCCGACGCTGCAACCAAAGTGC
GGGTAGCGCTAGGTTGACGCGTCAATCGTCCGGGACGTCCTCCAAACTCTCTGTATCCCAAGCCAGCCGCCTTCTAACTCACGACGGAAGACGCAGCCCAACTCCGACGCTGCAACCAAAGTGC
GGGTAGCGCTAGGTTGACGCGTCAATCGTCCGGGACGTCCTCCAAACCGGGTATGGTGGGAGCTGACACACCCAATTCTCACGACGGAAGACGCAGCCCAACTCCGACGCTGCAACCAAAGTGC
GGGTAGCGCTAGGTTGACGCGTCAATCGTCCGGGACGTCCTCCAAACTTTCTGCAAAGTCTTATGGCTTGTAGGATCTCTGCGTCTCACGACGGAAGACGCAGCCCAACTCCGACGCTGCAACCAAAGTGC
GGGTAGCGCTAGGTTGACGCGTCAATCGTCCGGGACGTCCTCCAAACTGCTTGTGTACATCTGCTGACACAAGTCATACCTAGCCTCACGACGGAAGACGCAGCCCAACTCCGACGCTGCAACCAAAGTGC
GGGTAGCGCTAGGTTGACGCGTCAATCGTCCGGGACGTCCTCCAAACAAATCATGTTCATTTTAACCCAGAACAGCAGAGCGCTCTCACGACGGAAGACGCAGCCCAACTCCGACGCTGCAACCAAAGTGC
GGGTAGCGCTAGGTTGACGCGTCAATCGTCCGGGACGTCCTCCAAACATAAATGGCTGCCACAATTCCATTCGACTAGGAGACACTCACGACGGAAGACGCAGCCCAACTCCGACGCTGCAACCAAAGTGC
GGGTAGCGCTAGGTTGACGCGTCAATCGTCCGGGACGTCCTCCAAACTTGCCATCCACAAAGAATATCTCACCCAGCAAGATCTCTCACGACGGAAGACGCAGCCCAACTCCGACGCTGCAACCAAAGTGC
GGGTAGCGCTAGGTTGACGCGTCAATCGTCCGGGACGTCCTCCAAACAATGCTCTGATGTTGCTACTAACGGTTCCTTCTGAGCCTCACGACGGAAGACGCAGCCCAACTCCGACGCTGCAACCAAAGTGC
GGGTAGCGCTAGGTTGACGCGTCAATCGTCCGGGACGTCCTCCAAACTTGTGGTTGAGGAGACATCCCAACAGCAGTTGCTCACGACGGAAGACGCAGCCCAACTCCGACGCTGCAACCAAAGTGC
GGGTAGCGCTAGGTTGACGCGTCAATCGTCCGGGACGTCCTCCAAACAAAATGCGTCCCCTGAACTCGCTTCCTATAAAACTCACTCACGACGGAAGACGCAGCCCAACTCCGACGCTGCAACCAAAGTGC
GGGTAGCGCTAGGTTGACGCGTCAATCGTCCGGGACGTCCTCCAAACAGCATATCAAAGACATTGCACAAATACAGCCAGGGACCTCACGACGGAAGACGCAGCCCAACTCCGACGCTGCAACCAAAGTGC
GGGTAGCGCTAGGTTGACGCGTCAATCGTCCGGGACGTCCTCCAAACAGGCAAAATTAGCCACATACAGTCATCAGACTGTGCACTCACGACGGAAGACGCAGCCCAACTCCGACGCTGCAACCAAAGTGC
GGGTAGCGCTAGGTTGACGCGTCAATCGTCCGGGACGTCCTCCAAACTGATGCAGTTATTTTATTTCAGACCAGCAGGCAGGGACTCACGACGGAAGACGCAGCCCAACTCCGACGCTGCAACCAAAGTGC
GGGTAGCGCTAGGTTGACGCGTCAATCGTCCGGGACGTCCTCCAAACAAAACTCAAAAGCAACCAACCTCAGCATACCACATGGCTCACGACGGAAGACGCAGCCCAACTCCGACGCTGCAACCAAAGTGC
GGGTAGCGCTAGGTTGACGCGTCAATCGTCCGGGACGTCCTCCAAACTTATCTTGAAAACCAGCCACATTCTTGCATGGCTAGGCTCACGACGGAAGACGCAGCCCAACTCCGACGCTGCAACCAAAGTGC
GGGTAGCGCTAGGTTGACGCGTCAATCGTCCGGGACGTCCTCCAAACTCCTATTTCCCTACCTCTGGAAGAGTACTTACACGCCCTCACGACGGAAGACGCAGCCCAACTCCGACGCTGCAACCAAAGTGC
GGGTAGCGCTAGGTTGACGCGTCAATCGTCCGGGACGTCCTCCAAACTGGCTTTGTATACAGCTACTACTGCTACAGAAGCCCTCTCACGACGGAAGACGCAGCCCAACTCCGACGCTGCAACCAAAGTGC
GGGTAGCGCTAGGTTGACGCGTCAATCGTCCGGGACGTCCTCCAAACCACTGGGAGATGAATGAGGTTATGAGGCTTCCCTCTCACGACGGAAGACGCAGCCCAACTCCGACGCTGCAACCAAAGTGC
GGGTAGCGCTAGGTTGACGCGTCAATCGTCCGGGACGTCCTCCAAACACCTTTCACTTTATACATCATACTGCCACCTGCTGGCCTCACGACGGAAGACGCAGCCCAACTCCGACGCTGCAACCAAAGTGC
GGGTAGCGCTAGGTTGACGCGTCAATCGTCCGGGACGTCCTCCAAACTTCTAACCAGGGTATTCTGAATGCACAGGAACCTTGTCTCACGACGGAAGACGCAGCCCAACTCCGACGCTGCAACCAAAGTGC
GGGTAGCGCTAGGTTGACGCGTCAATCGTCCGGGACGTCCTCCAAACCCCCATGCTTCAAATGTTTCAGGGCCACTCCCTCACGACGGAAGACGCAGCCCAACTCCGACGCTGCAACCAAAGTGC
GGGTAGCGCTAGGTTGACGCGTCAATCGTCCGGGACGTCCTCCAAACGCACTTAAGCACTGAGCCCACAACCTGTCCCTCACGACGGAAGACGCAGCCCAACTCCGACGCTGCAACCAAAGTGC
GGGTAGCGCTAGGTTGACGCGTCAATCGTCCGGGACGTCCTCCAAACTGAGTGCAGACTAAGTGGTATGCCTGAGCTAAACATGCTCACGACGGAAGACGCAGCCCAACTCCGACGCTGCAACCAAAGTGC
GGGTAGCGCTAGGTTGACGCGTCAATCGTCCGGGACGTCCTCCAAACGCAGCCAAAGATAAGCAAGAAACTCCCTGCACTCTCACGACGGAAGACGCAGCCCAACTCCGACGCTGCAACCAAAGTGC
GGGTAGCGCTAGGTTGACGCGTCAATCGTCCGGGACGTCCTCCAAACGGGGACCAATCAGTCCTGCACTGTGTTGGGCTCACGACGGAAGACGCAGCCCAACTCCGACGCTGCAACCAAAGTGC
GGGTAGCGCTAGGTTGACGCGTCAATCGTCCGGGACGTCCTCCAAACGGGTGGAAGGGACAGCAGAGGCAGCTGCATCTCACGACGGAAGACGCAGCCCAACTCCGACGCTGCAACCAAAGTGC
GGGTAGCGCTAGGTTGACGCGTCAATCGTCCGGGACGTCCTCCAAACAAATAGAACAATCCCTATAGCCAACTGCCAGAGCCACTCACGACGGAAGACGCAGCCCAACTCCGACGCTGCAACCAAAGTGC
GGGTAGCGCTAGGTTGACGCGTCAATCGTCCGGGACGTCCTCCAAACCCATTCCCAACTCAACAACATACACACACCTTTCTGGCTCACGACGGAAGACGCAGCCCAACTCCGACGCTGCAACCAAAGTGC
GGGTAGCGCTAGGTTGACGCGTCAATCGTCCGGGACGTCCTCCAAACTCATAACCTCAACCTAGTGTCACGCCTAAACACAACACTCACGACGGAAGACGCAGCCCAACTCCGACGCTGCAACCAAAGTGC
GGGTAGCGCTAGGTTGACGCGTCAATCGTCCGGGACGTCCTCCAAACGGCCAGCGGCTGACATCAATTTACCAGCCACTCACGACGGAAGACGCAGCCCAACTCCGACGCTGCAACCAAAGTGC
GGGTAGCGCTAGGTTGACGCGTCAATCGTCCGGGACGTCCTCCAAACCACATACTGTTCTGCCTCTGTCCTGCTTTTCCTCACTCACGACGGAAGACGCAGCCCAACTCCGACGCTGCAACCAAAGTGC
GGGTAGCGCTAGGTTGACGCGTCAATCGTCCGGGACGTCCTCCAAACCTCCCACTATCAGACTCCTCAGTCAGGGAGATCTCTCACGACGGAAGACGCAGCCCAACTCCGACGCTGCAACCAAAGTGC
GGGTAGCGCTAGGTTGACGCGTCAATCGTCCGGGACGTCCTCCAAACTTGCCAAGACTTGGGATGGTCATAAACTGCTCAAGACTCACGACGGAAGACGCAGCCCAACTCCGACGCTGCAACCAAAGTGC
GGGTAGCGCTAGGTTGACGCGTCAATCGTCCGGGACGTCCTCCAAACGTTTAGCTGACTCACTGCCTTTCTTCCATCACGGCTCACGACGGAAGACGCAGCCCAACTCCGACGCTGCAACCAAAGTGC
GGGTAGCGCTAGGTTGACGCGTCAATCGTCCGGGACGTCCTCCAAACATATGAACATTGCCCCAGATAATATCCGGGACAGCTCTCACGACGGAAGACGCAGCCCAACTCCGACGCTGCAACCAAAGTGC
GGGTAGCGCTAGGTTGACGCGTCAATCGTCCGGGACGTCCTCCAAACTGAGCTTTGTCTTTTACTTTGCCTGTGCTGTCTTCAGCTCACGACGGAAGACGCAGCCCAACTCCGACGCTGCAACCAAAGTGC
GGGTAGCGCTAGGTTGACGCGTCAATCGTCCGGGACGTCCTCCAAACTCAAGTGACCTCCTGAAACAATATGCAGACAGCATGGCTCACGACGGAAGACGCAGCCCAACTCCGACGCTGCAACCAAAGTGC
GGGTAGCGCTAGGTTGACGCCGACGCTGCAACCAAAGTGC
GGGTAGCGCTAGGTTGACGCGTCAATCGTCCGGGACGTCCTCCAAACAGCTCAAAGAACCAGCAGCTCAGCGCACCCGATTGGCGCTAGCCCACACCGATTCCGCGACGCTGCAACCAAAGTGC
GGGTAGCGCTAGGTTGACGCGTCAATCGTCCGGGACGTCCTCCAAACCCCCAGAGGCTGATTATATATAATTGTGGGCCATGGTGATTGGCGCTAGCCCACACCGATTCCGCGACGCTGCAACCAAAGTGC
GGGTAGCGCTAGGTTGACGCGTCAATCGTCCGGGACGTCCTCCAAACTTACCCTTCCCTTCAAACCTATCTTCAGATCCCCAGAGATTGGCGCTAGCCCACACCGATTCCGCGACGCTGCAACCAAAGTGC
GGGTAGCGCTAGGTTGACGCGTCAATCGTCCGGGACGTCCTCCAAACGTTTCTCCCAAGTCAGAGTACCCCAAAACTGTAGCTGATTGGCGCTAGCCCACACCGATTCCGCGACGCTGCAACCAAAGTGC
GGGTAGCGCTAGGTTGACGCGTCAATCGTCCGGGACGTCCTCCAAACATCTTCAGTTGAGACAGTGGAGGTCTGGAGGTTATGAGATTGGCGCTAGCCCACACCGATTCCGCGACGCTGCAACCAAAGTGC
GGGTAGCGCTAGGTTGACGCGTCAATCGTCCGGGACGTCCTCCAAACAGGCTTATTGAGGTCATGTACACTCACCTGATTTGGCGATTGGCGCTAGCCCACACCGATTCCGCGACGCTGCAACCAAAGTGC
GGGTAGCGCTAGGTTGACGCGTCAATCGTCCGGGACGTCCTCCAAACATGTTTCCCTTTACATGTGTCCAAGCCCCAGCGATTGGCGCTAGCCCACACCGATTCCGCGACGCTGCAACCAAAGTGC
GGGTAGCGCTAGGTTGACGCGTCAATCGTCCGGGACGTCCTCCAAACACTGAGCTGGGCTCAGAAATTTTGCTCTATATTCGGAGATTGGCGCTAGCCCACACCGATTCCGCGACGCTGCAACCAAAGTGC
GGGTAGCGCTAGGTTGACGCGTCAATCGTCCGGGACGTCCTCCAAACACATACCCAAGCCTTTGATGTTTCCAAGGAGTAAGCTGATTGGCGCTAGCCCACACCGATTCCGCGACGCTGCAACCAAAGTGC
GGGTAGCGCTAGGTTGACGCGTCAATCGTCCGGGACGTCCTCCAAACAAACTCCCAGGTGGTAGTAAGTAAACGAAAACGTGGAGATTGGCGCTAGCCCACACCGATTCCGCGACGCTGCAACCAAAGTGC
GGGTAGCGCTAGGTTGACGCGTCAATCGTCCGGGACGTCCTCCAAACTGACTGAGTTACCTTTGAATGGTGGAACAAACTGGCTGATTGGCGCTAGCCCACACCGATTCCGCGACGCTGCAACCAAAGTGC
GGGTAGCGCTAGGTTGACGCGTCAATCGTCCGGGACGTCCTCCAAACTAAGCCCAAAGCTGCCACAATTTATAGGATCACTGGTGATTGGCGCTAGCCCACACCGATTCCGCGACGCTGCAACCAAAGTGC
GGGTAGCGCTAGGTTGACGCGTCAATCGTCCGGGACGTCCTCCAAACTGTTGACGTACAGGAGAAAATGAATGTGAGGGTGTGTGATTGGCGCTAGCCCACACCGATTCCGCGACGCTGCAACCAAAGTGC
GGGTAGCGCTAGGTTGACGCGTCAATCGTCCGGGACGTCCTCCAAACACAGACTAAGCCATTACAGGTCTCTGGGGATATTCCAGATTGGCGCTAGCCCACACCGATTCCGCGACGCTGCAACCAAAGTGC
GGGTAGCGCTAGGTTGACGCGTCAATCGTCCGGGACGTCCTCCAAACAGCAGTTACGCCTTTCTTAGAATACAGGAAACACGCAGATTGGCGCTAGCCCACACCGATTCCGCGACGCTGCAACCAAAGTGC
GGGTAGCGCTAGGTTGACGCGTCAATCGTCCGGGACGTCCTCCAAACATATGTGCTGCATCTGGCAACAATGATCATCAGAAGCGATTGGCGCTAGCCCACACCGATTCCGCGACGCTGCAACCAAAGTGC
GGGTAGCGCTAGGTTGACGCGTCAATCGTCCGGGACGTCCTCCAAACACATCCATTAAGCTACCTGATTGGCTGCAAAAGCTGGATTGGCGCTAGCCCACACCGATTCCGCGACGCTGCAACCAAAGTGC
GGGTAGCGCTAGGTTGACGCGTCAATCGTCCGGGACGTCCTCCAAACTGAAGGAACAACAGTCAATCCAGCTTTCTTACGCAGAGATTGGCGCTAGCCCACACCGATTCCGCGACGCTGCAACCAAAGTGC
GGGTAGCGCTAGGTTGACGCGTCAATCGTCCGGGACGTCCTCCAAACAAAAGTCCCAGCACTTTGCCTCACCTGCACGATTGGCGCTAGCCCACACCGATTCCGCGACGCTGCAACCAAAGTGC
GGGTAGCGCTAGGTTGACGCGTCAATCGTCCGGGACGTCCTCCAAACACTGCTTCTATGAACACCCCTTCTCCTGCCTGATTGGCGCTAGCCCACACCGATTCCGCGACGCTGCAACCAAAGTGC
GGGTAGCGCTAGGTTGACGCGTCAATCGTCCGGGACGTCCTCCAAACGCCAGACTCACACATCACCTTCCTTGTTCCCGATTGGCGCTAGCCCACACCGATTCCGCGACGCTGCAACCAAAGTGC
GGGTAGCGCTAGGTTGACGCGTCAATCGTCCGGGACGTCCTCCAAACAGATTCTTCTCCAACACTCTGAAATGCCTCTTCAGGGGATTGGCGCTAGCCCACACCGATTCCGCGACGCTGCAACCAAAGTGC
GGGTAGCGCTAGGTTGACGCGTCAATCGTCCGGGACGTCCTCCAAACTCCCAGTCAGTGGTGGACATGAACCAGAGAGATTGGCGCTAGCCCACACCGATTCCGCGACGCTGCAACCAAAGTGC
GGGTAGCGCTAGGTTGACGCGTCAATCGTCCGGGACGTCCTCCAAACATTGAGATCCCCACACAAGTTCCTGCAGCCGATTGGCGCTAGCCCACACCGATTCCGCGACGCTGCAACCAAAGTGC
GGGTAGCGCTAGGTTGACGCGTCAATCGTCCGGGACGTCCTCCAAACTCTGCTTATGTGCTCACAGGGACCTGCTGCGATTGGCGCTAGCCCACACCGATTCCGCGACGCTGCAACCAAAGTGC
GGGTAGCGCTAGGTTGACGCGTCAATCGTCCGGGACGTCCTCCAAACAGGCCAGCTGTGACATAAGAGAGCAGAAATGCGATTGGCGCTAGCCCACACCGATTCCGCGACGCTGCAACCAAAGTGC
GGGTAGCGCTAGGTTGACGCGTCAATCGTCCGGGACGTCCTCCAAACAAGAAACTGAAAAGGGGCTAGGTAGAAGTCAGCTCAGGATTGGCGCTAGCCCACACCGATTCCGCGACGCTGCAACCAAAGTGC
GGGTAGCGCTAGGTTGACGCGTCAATCGTCCGGGACGTCCTCCAAACCACCCTGCCAGAAGTAAGGGCCTACTTCCCGATTGGCGCTAGCCCACACCGATTCCGCGACGCTGCAACCAAAGTGC
GGGTAGCGCTAGGTTGACGCGTCAATCGTCCGGGACGTCCTCCAAACTCTCTGTCTCAACTTGATCTCTCCCTTAGGACTCAGGGATTGGCGCTAGCCCACACCGATTCCGCGACGCTGCAACCAAAGTGC
GGGTAGCGCTAGGTTGACGCGTCAATCGTCCGGGACGTCCTCCAAACATGATGAATAAAATCCAGACGCAGGAGGTCCATCCAGATTGGCGCTAGCCCACACCGATTCCGCGACGCTGCAACCAAAGTGC
GGGTAGCGCTAGGTTGACGCGTCAATCGTCCGGGACGTCCTCCAAACTGTTACACCCTCATTATTTTCCACATCTGAAGCCCCTGATTGGCGCTAGCCCACACCGATTCCGCGACGCTGCAACCAAAGTGC
GGGTAGCGCTAGGTTGACGCGTCAATCGTCCGGGACGTCCTCCAAACTCAGCTCTGGAGTCTGCAGAGTGAGATCTGGTGATTGGCGCTAGCCCACACCGATTCCGCGACGCTGCAACCAAAGTGC
GGGTAGCGCTAGGTTGACGCGTCAATCGTCCGGGACGTCCTCCAAACTCTTTTGGGAACCCTGGAAGCTTCTAGTGAGTGAAGATTGGCGCTAGCCCACACCGATTCCGCGACGCTGCAACCAAAGTGC
GGGTAGCGCTAGGTTGACGCGTCAATCGTCCGGGACGTCCTCCAAACTTTTGTTCTGCTTCTTGTGATTTTGGTGTTTCCGGGGGATTGGCGCTAGCCCACACCGATTCCGCGACGCTGCAACCAAAGTGC
GGGTAGCGCTAGGTTGACGCGTCAATCGTCCGGGACGTCCTCCAAACCTTCTGGTTCTGGTGATGCAACCACATTGCTCTGATTGGCGCTAGCCCACACCGATTCCGCGACGCTGCAACCAAAGTGC
GGGTAGCGCTAGGTTGACGCGTCAATCGTCCGGGACGTCCTCCAAACAGCTCCATTCCACTCCAGAGATTTTGAAATCTGTGGGGATTGGCGCTAGCCCACACCGATTCCGCGACGCTGCAACCAAAGTGC
GGGTAGCGCTAGGTTGACGCGTCAATCGTCCGGGACGTCCTCCAAACTAAAACTTGGCTCTTTCGTGATGCCTACAAAACACGGGATTGGCGCTAGCCCACACCGATTCCGCGACGCTGCAACCAAAGTGC
GGGTAGCGCTAGGTTGACGCGTCAATCGTCCGGGACGTCCTCCAAACAAAGTCACTAGAATTGCAACGTGATAGACCTGGCAGGGATTGGCGCTAGCCCACACCGATTCCGCGACGCTGCAACCAAAGTGC
GGGTAGCGCTAGGTTGACGCGTCAATCGTCCGGGACGTCCTCCAAACAGGCAGTACATGCTGCCTCGTTTCTAATTACTTTCCTGATTGGCGCTAGCCCACACCGATTCCGCGACGCTGCAACCAAAGTGC
GGGTAGCGCTAGGTTGACGCGTCAATCGTCCGGGACGTCCTCCAAACGTGCTACTTAACAGAACAATGGGCCCTGGTACTGTGATTGGCGCTAGCCCACACCGATTCCGCGACGCTGCAACCAAAGTGC
GGGTAGCGCTAGGTTGACGCGTCAATCGTCCGGGACGTCCTCCAAACTCACAAAGCTTCTCTTATGTGGAGCAGACCAAGATGAGATTGGCGCTAGCCCACACCGATTCCGCGACGCTGCAACCAAAGTGC
GGGTAGCGCTAGGTTGACGCGTCAATCGTCCGGGACGTCCTCCAAACGAAGGGATGAGATGTCACTGTGCTGGATCTTGGTGATTGGCGCTAGCCCACACCGATTCCGCGACGCTGCAACCAAAGTGC
GGGTAGCGCTAGGTTGACGCGTCAATCGTCCGGGACGTCCTCCAAACACCTTCTATGAAGGTAAGAGCAGCTCTGCAGAATGACGATTGGCGCTAGCCCACACCGATTCCGCGACGCTGCAACCAAAGTGC
GGGTAGCGCTAGGTTGACGCGTCAATCGTCCGGGACGTCCTCCAAACAGCCACTGAGAGACTGCCCTAGTTTAGGGCGATTGGCGCTAGCCCACACCGATTCCGCGACGCTGCAACCAAAGTGC
GGGTAGCGCTAGGTTGACGCGTCAATCGTCCGGGACGTCCTCCAAACTAAGACAGTTGCAGGGTGCAGAAGGAAGATTAAGACCGATTGGCGCTAGCCCACACCGATTCCGCGACGCTGCAACCAAAGTGC
GGGTAGCGCTAGGTTGACGCGTCAATCGTCCGGGACGTCCTCCAAACAGAATGGAAAGGGAAGGTGGAAAGAAAATTGGGCATGGATTGGCGCTAGCCCACACCGATTCCGCGACGCTGCAACCAAAGTGC
GGGTAGCGCTAGGTTGACGCGTCAATCGTCCGGGACGTCCTCCAAACAGGTAAAACCCAGGGCTCCTTAGCCTCTGTGATTGGCGCTAGCCCACACCGATTCCGCGACGCTGCAACCAAAGTGC
GGGTAGCGCTAGGTTGACGCGTCAATCGTCCGGGACGTCCTCCAAACTGTAGATGTCTTGGCCATGTCACCCCGGGTGATTGGCGCTAGCCCACACCGATTCCGCGACGCTGCAACCAAAGTGC
GGGTAGCGCTAGGTTGACGCGTCAATCGTCCGGGACGTCCTCCAAACCCCTGAGGGAGAATATTTGACAGCAAAACAAAGCAGGGATTGGCGCTAGCCCACACCGATTCCGCGACGCTGCAACCAAAGTGC
GGGTAGCGCTAGGTTGACGCGTCAATCGTCCGGGACGTCCTCCAAACAGCACAAAATGAAAGAAGATTCTCAAGTGGTCTGCCGGATTGGCGCTAGCCCACACCGATTCCGCGACGCTGCAACCAAAGTGC
GGGTAGCGCTAGGTTGACGCGTCAATCGTCCGGGACGTCCTCCAAACCTGTCTCCCAGCACCAGCAAATCCCCAGGGGATTGGCGCTAGCCCACACCGATTCCGCGACGCTGCAACCAAAGTGC
GGGTAGCGCTAGGTTGACGCGTCAATCGTCCGGGACGTCCTCCAAACATACACTACTCTAAAAGAAGGGACAGCCATCCTCGGTGATTGGCGCTAGCCCACACCGATTCCGCGACGCTGCAACCAAAGTGC
GGGTAGCGCTAGGTTGACGCGTCAATCGTCCGGGACGTCCTCCAAACTTTTGCTAACCTCCCACCTCCCATTCTGAGCAGATTGGCGCTAGCCCACACCGATTCCGCGACGCTGCAACCAAAGTGC
GGGTAGCGCTAGGTTGACGCGTCAATCGTCCGGGACGTCCTCCAAACTTCTGGAATTCTTGCTCAGTCCCTCCCCATGAGATTGGCGCTAGCCCACACCGATTCCGCGACGCTGCAACCAAAGTGC
GGGTAGCGCTAGGTTGACGCGTCAATCGTCCGGGACGTCCTCCAAACCCTAAAATTCCCCACTAACGTTCCTCCCCTAGTCCGATTGGCGCTAGCCCACACCGATTCCGCGACGCTGCAACCAAAGTGC
GGGTAGCGCTAGGTTGACGCGTCAATCGTCCGGGACGTCCTCCAAACATATACCATGCTCTAAGGTGGCTTTGCTCTCATGGTGATTGGCGCTAGCCCACACCGATTCCGCGACGCTGCAACCAAAGTGC
GGGTAGCGCTAGGTTGACGCGTCAATCGTCCGGGACGTCCTCCAAACCTCATTTCATCACCTTCCCCTCAAATGCAGCTGATCGATTGGCGCTAGCCCACACCGATTCCGCGACGCTGCAACCAAAGTGC
GGGTAGCGCTAGGTTGACGCGTCAATCGTCCGGGACGTCCTCCAAACATGAATTTTCCAGTGTCATAATAGCCCTGTAGGCGCTGATTGGCGCTAGCCCACACCGATTCCGCGACGCTGCAACCAAAGTGC
GGGTAGCGCTAGGTTGACGCGTCAATCGTCCGGGACGTCCTCCAAACAAAGAGGATTATGAGCAGAGGGATTTTCCTAGCACCCGATTGGCGCTAGCCCACACCGATTCCGCGACGCTGCAACCAAAGTGC
GGGTAGCGCTAGGTTGACGCGTCAATCGTCCGGGACGTCCTCCAAACTGCCGGAGAAGCAGGGACACCCAGTCTCTGGATTGGCGCTAGCCCACACCGATTCCGCGACGCTGCAACCAAAGTGC
GGGTAGCGCTAGGTTGACGCGTCAATCGTCCGGGACGTCCTCCAAACAAGTTTGCCGCTGGGTCAGATCATGATGCTGATTGGCGCTAGCCCACACCGATTCCGCGACGCTGCAACCAAAGTGC
GGGTAGCGCTAGGTTGACGCGTCAATCGTCCGGGACGTCCTCCAAACTCAGAGGAACTCTAAAAGAGACACTCACTCTTGCCCAGATTGGCGCTAGCCCACACCGATTCCGCGACGCTGCAACCAAAGTGC
GGGTAGCGCTAGGTTGACGCGTCAATCGTCCGGGACGTCCTCCAAACTACCTCGTCGTCTTACTAACTTTCCAGGCTTGGTACCGATTGGCGCTAGCCCACACCGATTCCGCGACGCTGCAACCAAAGTGC
GGGTAGCGCTAGGTTGACGCGTCAATCGTCCGGGACGTCCTCCAAACAACATTTATGTGACTTACATGCCATGCTCGCACACAGATTGGCGCTAGCCCACACCGATTCCGCGACGCTGCAACCAAAGTGC
GGGTAGCGCTAGGTTGACGCGTCAATCGTCCGGGACGTCCTCCAAACTCACATGTGGGACACTAAGCACTGATCTGTGTACTCGATTGGCGCTAGCCCACACCGATTCCGCGACGCTGCAACCAAAGTGC
GGGTAGCGCTAGGTTGACGCGTCAATCGTCCGGGACGTCCTCCAAACACCAGGCCCTTAATAGGCAACATCTCATTTAAACCCTGATTGGCGCTAGCCCACACCGATTCCGCGACGCTGCAACCAAAGTGC
GGGTAGCGCTAGGTTGACGCGTCAATCGTCCGGGACGTCCTCCAAACCTCACTTGGTGAAACTAGCTCAATTTGCCCAACATCAGATTGGCGCTAGCCCACACCGATTCCGCGACGCTGCAACCAAAGTGC
GGGTAGCGCTAGGTTGACGCGTCAATCGTCCGGGACGTCCTCCAAACTCTATCACCCTCCGGGAAACTCTGGCCCAGGATTGGCGCTAGCCCACACCGATTCCGCGACGCTGCAACCAAAGTGC
GGGTAGCGCTAGGTTGACGCGTCAATCGTCCGGGACGTCCTCCAAACTTAGCCCAAGGTTTACTTAGCCCAAGTTATAACGGCTGATTGGCGCTAGCCCACACCGATTCCGCGACGCTGCAACCAAAGTGC
GGGTAGCGCTAGGTTGACGCGTCAATCGTCCGGGACGTCCTCCAAACTGGCCCAAGTTATAAACTTAGCCCAGGTTAGAATGGCGATTGGCGCTAGCCCACACCGATTCCGCGACGCTGCAACCAAAGTGC
GGGTAGCGCTAGGTTGACGCGTCAATCGTCCGGGACGTCCTCCAAACATTGATCTGATCTAAGTCCAGCCCATGGGTACTTTCGGATTGGCGCTAGCCCACACCGATTCCGCGACGCTGCAACCAAAGTGC
GGGTAGCGCTAGGTTGACGCGTCAATCGTCCGGGACGTCCTCCAAACCCCCACGGAGGAATTACAAGACTCGGACAAATAAGAGATTGGCGCTAGCCCACACCGATTCCGCGACGCTGCAACCAAAGTGC
GGGTAGCGCTAGGTTGACGCGTCAATCGTCCGGGACGTCCTCCAAACTTTTCCACAGGAAGTTCCTCTGGTATTCACTCAGCCGATTGGCGCTAGCCCACACCGATTCCGCGACGCTGCAACCAAAGTGC
GGGTAGCGCTAGGTTGACGCGTCAATCGTCCGGGACGTCCTCCAAACACCAGGAATTCCAGGCTCAGAGGTTACCCTGATTGGCGCTAGCCCACACCGATTCCGCGACGCTGCAACCAAAGTGC
GGGTAGCGCTAGGTTGACGCGTCAATCGTCCGGGACGTCCTCCAAACAACAAAAGGCAAACTCCCCTTCCATTCTGAATACACGGATTGGCGCTAGCCCACACCGATTCCGCGACGCTGCAACCAAAGTGC
GGGTAGCGCTAGGTTGACGCGTCAATCGTCCGGGACGTCCTCCAAACTTAAGATAAATGAGTCAGGAGATGTGGGACGCTGTGGGATTGGCGCTAGCCCACACCGATTCCGCGACGCTGCAACCAAAGTGC
GGGTAGCGCTAGGTTGACGCGTCAATCGTCCGGGACGTCCTCCAAACCCACCTGTGAAGTTGCAGGGTGCTAGTCCCGATTGGCGCTAGCCCACACCGATTCCGCGACGCTGCAACCAAAGTGC
GGGTAGCGCTAGGTTGACGCGTCAATCGTCCGGGACGTCCTCCAAACTGACAGCTACCAGCTACCTGGAACTTTTAACATACGCGATTGGCGCTAGCCCACACCGATTCCGCGACGCTGCAACCAAAGTGC
GGGTAGCGCTAGGTTGACGCGTCAATCGTCCGGGACGTCCTCCAAACGGGGTTAAATGCTAAGCTAAATGGGCCACAGGTGATTGGCGCTAGCCCACACCGATTCCGCGACGCTGCAACCAAAGTGC
GGGTAGCGCTAGGTTGACGCGTCAATCGTCCGGGACGTCCTCCAAACGTCCCAATCTGAAGTCGCCTTTAGTTCTCTTCGCAGATTGGCGCTAGCCCACACCGATTCCGCGACGCTGCAACCAAAGTGC
GGGTAGCGCTAGGTTGACGCGTCAATCGTCCGGGACGTCCTCCAAACAAGGGACCTCCTCCCATCTCCACTCCTCTTGATTGGCGCTAGCCCACACCGATTCCGCGACGCTGCAACCAAAGTGC
GGGTAGCGCTAGGTTGACGCGTCAATCGTCCGGGACGTCCTCCAAACCCCCTAAGTAAATGTGTCTCGCACCATCTGACTCTGATTGGCGCTAGCCCACACCGATTCCGCGACGCTGCAACCAAAGTGC
GGGTAGCGCTAGGTTGACGCGTCAATCGTCCGGGACGTCCTCCAAACTCGACACACTGCAGCTTGCAAATGTGAGTGAGATTGGCGCTAGCCCACACCGATTCCGCGACGCTGCAACCAAAGTGC
GGGTAGCGCTAGGTTGACGCGTCAATCGTCCGGGACGTCCTCCAAACGCGGAGAGGGAACTAGGTTAAGAGGCGGCGGATTGGCGCTAGCCCACACCGATTCCGCGACGCTGCAACCAAAGTGC
GGGTAGCGCTAGGTTGACGCGTCAATCGTCCGGGACGTCCTCCAAACCAGAGGGCTGCAGCGCAGAAAAGCAGCGTGGATTGGCGCTAGCCCACACCGATTCCGCGACGCTGCAACCAAAGTGC
GGGTAGCGCTAGGTTGACGCGTCAATCGTCCGGGACGTCCTCCAAACCAGCCTCACCTTGAAGCGCACCGGCATGTCGATTGGCGCTAGCCCACACCGATTCCGCGACGCTGCAACCAAAGTGC
GGGTAGCGCTAGGTTGACGCGTCAATCGTCCGGGACGTCCTCCAAACGGGGCGGGGCGATAACAGTGTTCCCTAGCAGATTGGCGCTAGCCCACACCGATTCCGCGACGCTGCAACCAAAGTGC
GGGTAGCGCTAGGTTGACGCGTCAATCGTCCGGGACGTCCTCCAAACGCTTCCCGCCTAGAGGCCTGTCGGTCTGTTGATTGGCGCTAGCCCACACCGATTCCGCGACGCTGCAACCAAAGTGC
GGGTAGCGCTAGGTTGACGCGTCAATCGTCCGGGACGTCCTCCAAACTTTTGGAGCCTAGGGACCAATAGAGACTCGCAGATTGGCGCTAGCCCACACCGATTCCGCGACGCTGCAACCAAAGTGC
GGGTAGCGCTAGGTTGACGCGTCAATCGTCCGGGACGTCCTCCAAACAGTGCCTTACCTCCATTAGGATTTGACCAATGAGTGGGATTGGCGCTAGCCCACACCGATTCCGCGACGCTGCAACCAAAGTGC
GGGTAGCGCTAGGTTGACGCGTCAATCGTCCGGGACGTCCTCCAAACCGAAAGGGAGCCGCCTACCTCCCTTGCCAAGATTGGCGCTAGCCCACACCGATTCCGCGACGCTGCAACCAAAGTGC
GGGTAGCGCTAGGTTGACGCGTCAATCGTCCGGGACGTCCTCCAAACCCTGGGGCTGATAGAGATGGCGGGCGGAAGGATTGGCGCTAGCCCACACCGATTCCGCGACGCTGCAACCAAAGTGC
GGGTAGCGCTAGGTTGACGCGTCAATCGTCCGGGACGTCCTCCAAACGCGCAGCAATGCGTCTGCTTGCTGGTGGAAGATTGGCGCTAGCCCACACCGATTCCGCGACGCTGCAACCAAAGTGC
GGGTAGCGCTAGGTTGACGCGTCAATCGTCCGGGACGTCCTCCAAACCCTCGCTGGCCCAGGTGCTTGACAGCATCAAAGATTGGCGCTAGCCCACACCGATTCCGCGACGCTGCAACCAAAGTGC
GGGTAGCGCTAGGTTGACGCGTCAATCGTCCGGGACGTCCTCCAAACTATTCTGCTGAATATCGGTTCGTACAAACGACAGCCGGATTGGCGCTAGCCCACACCGATTCCGCGACGCTGCAACCAAAGTGC
GGGTAGCGCTAGGTTGACGCGTCAATCGTCCGGGACGTCCTCCAAACTTGAAACTCGAAAGACAAACTGCTGTCTCTTCCTCCAGATTGGCGCTAGCCCACACCGATTCCGCGACGCTGCAACCAAAGTGC
GGGTAGCGCTAGGTTGACGCGTCAATCGTCCGGGACGTCCTCCAAACTTGAAGATGGTTGTCTCAACTTCCAAACCTTCAGCCTGATTGGCGCTAGCCCACACCGATTCCGCGACGCTGCAACCAAAGTGC
GGGTAGCGCTAGGTTGACGCGTCAATCGTCCGGGACGTCCTCCAAACAAAGGTGTCAATAATAAGGGCTACAGGATCTGGGAGCGATTGGCGCTAGCCCACACCGATTCCGCGACGCTGCAACCAAAGTGC
GGGTAGCGCTAGGTTGACGCGTCAATCGTCCGGGACGTCCTCCAAACAGGGAGTCATTTCGGACGGCAGAAGATGCGGATTGGCGCTAGCCCACACCGATTCCGCGACGCTGCAACCAAAGTGC
GGGTAGCGCTAGGTTGACGCGTCAATCGTCCGGGACGTCCTCCAAACAAAAGTGGGACGATGAAAGGGCAGATGTCTGAATGGGATTGGCGCTAGCCCACACCGATTCCGCGACGCTGCAACCAAAGTGC
GGGTAGCGCTAGGTTGACGCGTCAATCGTCCGGGACGTCCTCCAAACAATGCTGCCAGGCTTCTTCCAGGAACAACAGATTGGCGCTAGCCCACACCGATTCCGCGACGCTGCAACCAAAGTGC
GGGTAGCGCTAGGTTGACGCGTCAATCGTCCGGGACGTCCTCCAAACACACCAATCCTTGATGCTTCCCTTTAAGCATTTTCCGGATTGGCGCTAGCCCACACCGATTCCGCGACGCTGCAACCAAAGTGC
GGGTAGCGCTAGGTTGACGCGTCAATCGTCCGGGACGTCCTCCAAACTATTAAATTAGTCCCAATGCAGCCATGCATCCAGGGGGATTGGCGCTAGCCCACACCGATTCCGCGACGCTGCAACCAAAGTGC
GGGTAGCGCTAGGTTGACGCGTCAATCGTCCGGGACGTCCTCCAAACCAGTGGAACATAGAACAAAAGTCATCTGCAGGAAGGCGATTGGCGCTAGCCCACACCGATTCCGCGACGCTGCAACCAAAGTGC
GGGTAGCGCTAGGTTGACGCGTCAATCGTCCGGGACGTCCTCCAAACAGCCCATCTTACAGAGTAAGAAAGGCACAACTTTGGTGATTGGCGCTAGCCCACACCGATTCCGCGACGCTGCAACCAAAGTGC
GGGTAGCGCTAGGTTGACGCGTCAATCGTCCGGGACGTCCTCCAAACAACTCAGTCACATCCCAGGCTTGCTAGAGAAGTGATTGGCGCTAGCCCACACCGATTCCGCGACGCTGCAACCAAAGTGC
GGGTAGCGCTAGGTTGACGCGTCAATCGTCCGGGACGTCCTCCAAACCACTGCCCCTTGTTCCAATAGCCATGCATCTGATTGGCGCTAGCCCACACCGATTCCGCGACGCTGCAACCAAAGTGC
GGGTAGCGCTAGGTTGACGCGTCAATCGTCCGGGACGTCCTCCAAACGTAGGTGTCACTCTTGCTGCTGGCTATCACAGCGATTGGCGCTAGCCCACACCGATTCCGCGACGCTGCAACCAAAGTGC
GGGTAGCGCTAGGTTGACGCGTCAATCGTCCGGGACGTCCTCCAAACCACTTTAGCTTGGTACTGAGTCTTCACTGGGCACAGATTGGCGCTAGCCCACACCGATTCCGCGACGCTGCAACCAAAGTGC
GGGTAGCGCTAGGTTGACGCGTCAATCGTCCGGGACGTCCTCCAAACGCAACTGGGTACAGCCACTCCTCAAACTGCGATTGGCGCTAGCCCACACCGATTCCGCGACGCTGCAACCAAAGTGC
GGGTAGCGCTAGGTTGACGCGTCAATCGTCCGGGACGTCCTCCAAACCTGGCATTGGTGGTAATCTATGGCAAAGCACCTGATTGGCGCTAGCCCACACCGATTCCGCGACGCTGCAACCAAAGTGC
GGGTAGCGCTAGGTTGACGCGTCAATCGTCCGGGACGTCCTCCAAACTCTGCTCCTTTGGGCCTTCTGATCCTGCATGATTGGCGCTAGCCCACACCGATTCCGCGACGCTGCAACCAAAGTGC
GGGTAGCGCTAGGTTGACGCGTCAATCGTCCGGGACGTCCTCCAAACTAGAAGATCACTGTTCAGGTGCTGCGGGGAGATTGGCGCTAGCCCACACCGATTCCGCGACGCTGCAACCAAAGTGC
GGGTAGCGCTAGGTTGACGCGTCAATCGTCCGGGACGTCCTCCAAACAACTTGCACACTTCCATACAACCCCTAACAAGCAAGGATTGGCGCTAGCCCACACCGATTCCGCGACGCTGCAACCAAAGTGC
GGGTAGCGCTAGGTTGACGCGTCAATCGTCCGGGACGTCCTCCAAACTGTCGCATAATGATGTCATTCACAGGCACTTTCTCCCGATTGGCGCTAGCCCACACCGATTCCGCGACGCTGCAACCAAAGTGC
GGGTAGCGCTAGGTTGACGCGTCAATCGTCCGGGACGTCCTCCAAACTCACTCATGAGTCCAACTCCATTAGCGGCAGCGATTGGCGCTAGCCCACACCGATTCCGCGACGCTGCAACCAAAGTGC
GGGTAGCGCTAGGTTGACGCGTCAATCGTCCGGGACGTCCTCCAAACACCTCACGATAAGGCTGTTGCTCCTTTTAGAGACAGATTGGCGCTAGCCCACACCGATTCCGCGACGCTGCAACCAAAGTGC
GGGTAGCGCTAGGTTGACGCGTCAATCGTCCGGGACGTCCTCCAAACAGAAAGGAGAAAGTGAGAAAGGGGCTAAATGTGAGCAGATTGGCGCTAGCCCACACCGATTCCGCGACGCTGCAACCAAAGTGC
GGGTAGCGCTAGGTTGACGCGTCAATCGTCCGGGACGTCCTCCAAACTACCTTACAAGGTAACTGAAATGCCAGTCTTTGGGCTGATTGGCGCTAGCCCACACCGATTCCGCGACGCTGCAACCAAAGTGC
GGGTAGCGCTAGGTTGACGCGTCAATCGTCCGGGACGTCCTCCAAACTTGGGCTTTCATTGGTAAATCTTGAGCTCAGCCTTTGGATTGGCGCTAGCCCACACCGATTCCGCGACGCTGCAACCAAAGTGC
GGGTAGCGCTAGGTTGACGCGTCAATCGTCCGGGACGTCCTCCAAACATTAAGACTTAGCAATGAGCCAAGTGCAATTTGCCCTGATTGGCGCTAGCCCACACCGATTCCGCGACGCTGCAACCAAAGTGC
GGGTAGCGCTAGGTTGACGCGTCAATCGTCCGGGACGTCCTCCAAACCCAGACTTTTAGCCGTGAGATGCCTTTGTTGACAGATTGGCGCTAGCCCACACCGATTCCGCGACGCTGCAACCAAAGTGC
GGGTAGCGCTAGGTTGACGCGTCAATCGTCCGGGACGTCCTCCAAACAGGGAGTGTCTGGCTTTTGAATCAGTGGGGCGATTGGCGCTAGCCCACACCGATTCCGCGACGCTGCAACCAAAGTGC
GGGTAGCGCTAGGTTGACGCGTCAATCGTCCGGGACGTCCTCCAAACACCTTTTGGAGGGACTCCAGGTTCTCTTGACAGATTGGCGCTAGCCCACACCGATTCCGCGACGCTGCAACCAAAGTGC
GGGTAGCGCTAGGTTGACGCGTCAATCGTCCGGGACGTCCTCCAAACTTTTGGTGAGCCGAAAGGACTCCTCACCATACAGATTGGCGCTAGCCCACACCGATTCCGCGACGCTGCAACCAAAGTGC
GGGTAGCGCTAGGTTGACGCGTCAATCGTCCGGGACGTCCTCCAAACAGGCCACGGCTGAGTAAAGTAATTCTCAGTAAGGCGATTGGCGCTAGCCCACACCGATTCCGCGACGCTGCAACCAAAGTGC
GGGTAGCGCTAGGTTGACGCGTCAATCGTCCGGGACGTCCTCCAAACATAATAATGTTGTACTGCAGCTGCACAAGGTCCAGGGGATTGGCGCTAGCCCACACCGATTCCGCGACGCTGCAACCAAAGTGC
GGGTAGCGCTAGGTTGACGCGTCAATCGTCCGGGACGTCCTCCAAACAAATCACCATCTCTTTGAAAAGTCCTCACAGGGACGCGATTGGCGCTAGCCCACACCGATTCCGCGACGCTGCAACCAAAGTGC
GGGTAGCGCTAGGTTGACGCGTCAATCGTCCGGGACGTCCTCCAAACAGTTAATCATGCTGTGGTGATGCTGAGACTGACTCAGATTGGCGCTAGCCCACACCGATTCCGCGACGCTGCAACCAAAGTGC
GGGTAGCGCTAGGTTGACGCGTCAATCGTCCGGGACGTCCTCCAAACTTGGCAGCTCTACCAGCAGCTTCCTGGTCAGATTGGCGCTAGCCCACACCGATTCCGCGACGCTGCAACCAAAGTGC
GGGTAGCGCTAGGTTGACGCGTCAATCGTCCGGGACGTCCTCCAAACTAGCAGAGGTGAAGTCGGAGCTTGTAGCAAAGGGATTGGCGCTAGCCCACACCGATTCCGCGACGCTGCAACCAAAGTGC
GGGTAGCGCTAGGTTGACGCGTCAATCGTCCGGGACGTCCTCCAAACTGTCTCAACTTAGCAGGCAGATTCTTGGTTCCACGGATTGGCGCTAGCCCACACCGATTCCGCGACGCTGCAACCAAAGTGC
GGGTAGCGCTAGGTTGACGCGTCAATCGTCCGGGACGTCCTCCAAACACTTCCTGACTGTAGGCTCCTTTAGTGAGTCTGTTCTGATTGGCGCTAGCCCACACCGATTCCGCGACGCTGCAACCAAAGTGC
GGGTAGCGCTAGGTTGACGCGTCAATCGTCCGGGACGTCCTCCAAACGTGATGTGGCCCTAGAGTCTACTTCTTCAGCTCTCAGATTGGCGCTAGCCCACACCGATTCCGCGACGCTGCAACCAAAGTGC
GGGTAGCGCTAGGTTGACGCGTCAATCGTCCGGGACGTCCTCCAAACATTCTTTAAGCCACTTGTATCAATCGTCGGTTGCCACGATTGGCGCTAGCCCACACCGATTCCGCGACGCTGCAACCAAAGTGC
GGGTAGCGCTAGGTTGACGCGTCAATCGTCCGGGACGTCCTCCAAACAGTCAGTGTACCTCACAAGCAGCACATACTTGAAGGCCGTTGCGGAGACCACGAACTGGCTCGCGACGCTGCAACCAAAGTGC
GGGTAGCGCTAGGTTGACGCGTCAATCGTCCGGGACGTCCTCCAAACAAACTCTGGTCCTATTGGGAGCTAGTTTCAATGCAGCCCGTTGCGGAGACCACGAACTGGCTCGCGACGCTGCAACCAAAGTGC
GGGTAGCGCTAGGTTGACGCGTCAATCGTCCGGGACGTCCTCCAAACTTCAAACCTTCAGGAGTGAAGAAGAGTACCTGTCAGCCCGTTGCGGAGACCACGAACTGGCTCGCGACGCTGCAACCAAAGTGC
GGGTAGCGCTAGGTTGACGCGTCAATCGTCCGGGACGTCCTCCAAACATGAGTTCCTTTTGCCACAGTGTAGAGTCCCAGACCGTTGCGGAGACCACGAACTGGCTCGCGACGCTGCAACCAAAGTGC
GGGTAGCGCTAGGTTGACGCGTCAATCGTCCGGGACGTCCTCCAAACTGGAACATTGCCACATCCTGTCCGGTTCCTCCGTTGCGGAGACCACGAACTGGCTCGCGACGCTGCAACCAAAGTGC
GGGTAGCGCTAGGTTGACGCGTCAATCGTCCGGGACGTCCTCCAAACGCCTTAGCAAAGAACTGACTCCTCCTACTGCCACCGTTGCGGAGACCACGAACTGGCTCGCGACGCTGCAACCAAAGTGC
GGGTAGCGCTAGGTTGACGCGTCAATCGTCCGGGACGTCCTCCAAACAAGCTTTCCAGCCTACTTCTGGTTCAAAACTCTCAGACCGTTGCGGAGACCACGAACTGGCTCGCGACGCTGCAACCAAAGTGC
GGGTAGCGCTAGGTTGACGCGTCAATCGTCCGGGACGTCCTCCAAACGACAAAACACTGGATCTGCATCTCCTCCTTTCCCTCCGTTGCGGAGACCACGAACTGGCTCGCGACGCTGCAACCAAAGTGC
GGGTAGCGCTAGGTTGACGCGTCAATCGTCCGGGACGTCCTCCAAACTCCCTAGACTGGTCTCCCCTTCCTTGCTTTGCCGTTGCGGAGACCACGAACTGGCTCGCGACGCTGCAACCAAAGTGC
GGGTAGCGCTAGGTTGACGCGTCAATCGTCCGGGACGTCCTCCAAACTGGCAAAGTGGTTATGTTTTGCTCCTGGGGCCCGTTGCGGAGACCACGAACTGGCTCGCGACGCTGCAACCAAAGTGC
GGGTAGCGCTAGGTTGACGCGTCAATCGTCCGGGACGTCCTCCAAACGGATCATCCACAGTCCTGTGCTTCCAGACATTCTCCGTTGCGGAGACCACGAACTGGCTCGCGACGCTGCAACCAAAGTGC
GGGTAGCGCTAGGTTGACGCGTCAATCGTCCGGGACGTCCTCCAAACGGTAACGTTGGTGCCATTGAAACAATGAGGAAAGCCCCGTTGCGGAGACCACGAACTGGCTCGCGACGCTGCAACCAAAGTGC
GGGTAGCGCTAGGTTGACGCGTCAATCGTCCGGGACGTCCTCCAAACAGATCCAGGAACCAACAGGACATCTGCTTATGACGCCGTTGCGGAGACCACGAACTGGCTCGCGACGCTGCAACCAAAGTGC
GGGTAGCGCTAGGTTGACGCGTCAATCGTCCGGGACGTCCTCCAAACAGCCAAAGGAAGGATGGGAATTGGGTATAGAGAAACCCCGTTGCGGAGACCACGAACTGGCTCGCGACGCTGCAACCAAAGTGC
GGGTAGCGCTAGGTTGACGCGTCAATCGTCCGGGACGTCCTCCAAACAAAGGAACTGGATTTGAGGAGCTATGCAGACTTGTCTCCGTTGCGGAGACCACGAACTGGCTCGCGACGCTGCAACCAAAGTGC
GGGTAGCGCTAGGTTGACGCGTCAATCGTCCGGGACGTCCTCCAAACATTGGAAAGCTAAACTCTGCAACTATAGGGACAGCCGCCGTTGCGGAGACCACGAACTGGCTCGCGACGCTGCAACCAAAGTGC
GGGTAGCGCTAGGTTGACGCGTCAATCGTCCGGGACGTCCTCCAAACAAGTCCTTGCTACATGTCTTTAGGTTGTCCATGCTGTCCGTTGCGGAGACCACGAACTGGCTCGCGACGCTGCAACCAAAGTGC
GGGTAGCGCTAGGTTGACGCGTCAATCGTCCGGGACGTCCTCCAAACTGCCATCACTACAGAGTGAGAGCTCATAGAAAGGACTCCGTTGCGGAGACCACGAACTGGCTCGCGACGCTGCAACCAAAGTGC
GGGTAGCGCTAGGTTGACGCGTCAATCGTCCGGGACGTCCTCCAAACATGGACTCCCACATCTGGTGACCCTGTCTGCCGTTGCGGAGACCACGAACTGGCTCGCGACGCTGCAACCAAAGTGC
GGGTAGCGCTAGGTTGACGCGTCAATCGTCCGGGACGTCCTCCAAACTGGACAGGCATGGCACTGATGGTGTGGAGTCCGTTGCGGAGACCACGAACTGGCTCGCGACGCTGCAACCAAAGTGC
GGGTAGCGCTAGGTTGACGCGTCAATCGTCCGGGACGTCCTCCAAACATAGATCTTGGGAGTAAAGCAACATGTCAGGGATGCACCGTTGCGGAGACCACGAACTGGCTCGCGACGCTGCAACCAAAGTGC
GGGTAGCGCTAGGTTGACGCGTCAATCGTCCGGGACGTCCTCCAAACTTCCTACTCTGGGGCCAGAGCTGGGACATTCCGTTGCGGAGACCACGAACTGGCTCGCGACGCTGCAACCAAAGTGC
GGGTAGCGCTAGGTTGACGCGTCAATCGTCCGGGACGTCCTCCAAACTCTGCTGCCCTCAGTAGCAGGTGAACTGTTCCGTTGCGGAGACCACGAACTGGCTCGCGACGCTGCAACCAAAGTGC
GGGTAGCGCTAGGTTGACGCGTCAATCGTCCGGGACGTCCTCCAAACAGGCAGCTTACAGGGCTGCATTATTAGAAAGTCCTCCGTTGCGGAGACCACGAACTGGCTCGCGACGCTGCAACCAAAGTGC
GGGTAGCGCTAGGTTGACGCGTCAATCGTCCGGGACGTCCTCCAAACCAGTCCTCAATTCTCCAGTCTCTTCCAAGTACTGTGCCCGTTGCGGAGACCACGAACTGGCTCGCGACGCTGCAACCAAAGTGC
GGGTAGCGCTAGGTTGACGCGTCAATCGTCCGGGACGTCCTCCAAACGGGGAAATGCAATGGGGAAAGTTTGCAGCTCCGTTGCGGAGACCACGAACTGGCTCGCGACGCTGCAACCAAAGTGC
GGGTAGCGCTAGGTTGACGCGTCAATCGTCCGGGACGTCCTCCAAACGGAGTTGGTTTAACAGCAGAATGAAGAGAGGAGGGTCCGTTGCGGAGACCACGAACTGGCTCGCGACGCTGCAACCAAAGTGC
GGGTAGCGCTAGGTTGACGCGTCAATCGTCCGGGACGTCCTCCAAACTGCATAACAGGGCAAGAATGTATGAACTCTCATGGGCCCGTTGCGGAGACCACGAACTGGCTCGCGACGCTGCAACCAAAGTGC
GGGTAGCGCTAGGTTGACGCGTCAATCGTCCGGGACGTCCTCCAAACCAAGCTAGACAGATGGAGAGGACCAACCTGGACCGTTGCGGAGACCACGAACTGGCTCGCGACGCTGCAACCAAAGTGC
GGGTAGCGCTAGGTTGACGCGTCAATCGTCCGGGACGTCCTCCAAACCCTACCTAACAGTATTCCCTGAAGGGGAAATGTGACCCCGTTGCGGAGACCACGAACTGGCTCGCGACGCTGCAACCAAAGTGC
GGGTAGCGCTAGGTTGACGCGTCAATCGTCCGGGACGTCCTCCAAACCAACTGTGGATTGCCAGAAGTTCAGGTGTTGAGAGCCGTTGCGGAGACCACGAACTGGCTCGCGACGCTGCAACCAAAGTGC
GGGTAGCGCTAGGTTGACGCGTCAATCGTCCGGGACGTCCTCCAAACTGAGATCAATGTGGTCCCTGAAGTGCAGCCCCGTTGCGGAGACCACGAACTGGCTCGCGACGCTGCAACCAAAGTGC
GGGTAGCGCTAGGTTGACGCGTCAATCGTCCGGGACGTCCTCCAAACAAAAGGGAGCTGCAGTCAGAGGTCCTCACTCCGTTGCGGAGACCACGAACTGGCTCGCGACGCTGCAACCAAAGTGC
GGGTAGCGCTAGGTTGACGCGTCAATCGTCCGGGACGTCCTCCAAACATAGTGTATCTATCTCAAGGGCCACACGAGTGACCTCCGTTGCGGAGACCACGAACTGGCTCGCGACGCTGCAACCAAAGTGC
GGGTAGCGCTAGGTTGACGCGTCAATCGTCCGGGACGTCCTCCAAACAGGCTCATTTCCAACATTGACAATGCAGTAGTCCTCCCCGTTGCGGAGACCACGAACTGGCTCGCGACGCTGCAACCAAAGTGC
GGGTAGCGCTAGGTTGACGCGTCAATCGTCCGGGACGTCCTCCAAACGTAAAAGCTGTTGATTCTCTCCTTTTACGGTGCCTGCCCGTTGCGGAGACCACGAACTGGCTCGCGACGCTGCAACCAAAGTGC
GGGTAGCGCTAGGTTGACGCGTCAATCGTCCGGGACGTCCTCCAAACACATGTACACCCTTCCTTTTCCACATTACATCCTCCCCCGTTGCGGAGACCACGAACTGGCTCGCGACGCTGCAACCAAAGTGC
GGGTAGCGCTAGGTTGACGCGTCAATCGTCCGGGACGTCCTCCAAACATTCTTGGGGCATAGGTCCCTCTTATTTTGTGTGTGTCCGTTGCGGAGACCACGAACTGGCTCGCGACGCTGCAACCAAAGTGC
GGGTAGCGCTAGGTTGACGCGTCAATCGTCCGGGACGTCCTCCAAACTGCAGGGGAGGTAAAGGGAAGACAAGCAAACCCGTTGCGGAGACCACGAACTGGCTCGCGACGCTGCAACCAAAGTGC
GGGTAGCGCTAGGTTGACGCGTCAATCGTCCGGGACGTCCTCCAAACTTCATTTGGCCATTCTGCTCTTTCTCCTTCATTTCCCCCGTTGCGGAGACCACGAACTGGCTCGCGACGCTGCAACCAAAGTGC
GGGTAGCGCTAGGTTGACGCGTCAATCGTCCGGGACGTCCTCCAAACTGACTAAACTTTGTCGCTTCTCCCTCCAATCACGGCCGTTGCGGAGACCACGAACTGGCTCGCGACGCTGCAACCAAAGTGC
GGGTAGCGCTAGGTTGACGCGTCAATCGTCCGGGACGTCCTCCAAACTTCTTAACCCTGACTTCCATCTTCAAACCCATCACCACCGTTGCGGAGACCACGAACTGGCTCGCGACGCTGCAACCAAAGTGC
GGGTAGCGCTAGGTTGACGCGTCAATCGTCCGGGACGTCCTCCAAACTCACTTAAATCTTTTGCTTTCCTCTTTCGCCCTCTGCCCGTTGCGGAGACCACGAACTGGCTCGCGACGCTGCAACCAAAGTGC
GGGTAGCGCTAGGTTGACGCGTCAATCGTCCGGGACGTCCTCCAAACTATGCCTCAGTACAGCCCCAGCTCCCCACACCGTTGCGGAGACCACGAACTGGCTCGCGACGCTGCAACCAAAGTGC
GGGTAGCGCTAGGTTGACGCGTCAATCGTCCGGGACGTCCTCCAAACCCAAGGCAGCCAGGGCTACAGCCTCTTTGTCCGTTGCGGAGACCACGAACTGGCTCGCGACGCTGCAACCAAAGTGC
GGGTAGCGCTAGGTTGACGCGTCAATCGTCCGGGACGTCCTCCAAACGAGTCTCCGTGGACTCAGCTCTTCAGCCCCCCGTTGCGGAGACCACGAACTGGCTCGCGACGCTGCAACCAAAGTGC
GGGTAGCGCTAGGTTGACGCGTCAATCGTCCGGGACGTCCTCCAAACTGTTCAGTATTCCCAGTTTCCATTCCCATCAAGTGCACCGTTGCGGAGACCACGAACTGGCTCGCGACGCTGCAACCAAAGTGC
GGGTAGCGCTAGGTTGACGCGTCAATCGTCCGGGACGTCCTCCAAACAATCCTTCAGCTAGAGAGCACTTTCTAGAACTTCCGCCCGTTGCGGAGACCACGAACTGGCTCGCGACGCTGCAACCAAAGTGC
GGGTAGCGCTAGGTTGACGCGTCAATCGTCCGGGACGTCCTCCAAACTGGCTCCACTCTGTACAACCTTATTTCCTTCCACTTCCGTTGCGGAGACCACGAACTGGCTCGCGACGCTGCAACCAAAGTGC
GGGTAGCGCTAGGTTGACGCGTCAATCGTCCGGGACGTCCTCCAAACTGCCTGCCCTGTCTCCCTACTGCACCAAGACCGTTGCGGAGACCACGAACTGGCTCGCGACGCTGCAACCAAAGTGC
GGGTAGCGCTAGGTTGACGCGTCAATCGTCCGGGACGTCCTCCAAACCCACGTCACATTGTTTCTGGTCTCTGCTTCTTGCCCGTTGCGGAGACCACGAACTGGCTCGCGACGCTGCAACCAAAGTGC
GGGTAGCGCTAGGTTGACGCGTCAATCGTCCGGGACGTCCTCCAAACTTCTCGCCTAAATTTCCCTCCTCACTCTTCTCTACCACCGTTGCGGAGACCACGAACTGGCTCGCGACGCTGCAACCAAAGTGC
GGGTAGCGCTAGGTTGACGCGTCAATCGTCCGGGACGTCCTCCAAACTCTACTTGTTATTTAGCCCGGCTCAATCTCAGCTTCCCCGTTGCGGAGACCACGAACTGGCTCGCGACGCTGCAACCAAAGTGC
GGGTAGCGCTAGGTTGACGCGTCAATCGTCCGGGACGTCCTCCAAACTATTACTGTAGCACCTGAAACCAACATTTGACCCCGACCGTTGCGGAGACCACGAACTGGCTCGCGACGCTGCAACCAAAGTGC
GGGTAGCGCTAGGTTGACGCGTCAATCGTCCGGGACGTCCTCCAAACTAAAATCCGTTTTCTAAAGTTCAGTGTCCCTGCCCCACCGTTGCGGAGACCACGAACTGGCTCGCGACGCTGCAACCAAAGTGC
GGGTAGCGCTAGGTTGACGCGTCAATCGTCCGGGACGTCCTCCAAACCCCTTCCCTACTGCACACCTGGAAAAGCCACCGTTGCGGAGACCACGAACTGGCTCGCGACGCTGCAACCAAAGTGC
GGGTAGCGCTAGGTTGACGCGTCAATCGTCCGGGACGTCCTCCAAACACACTGAAGACCCAAGGAAGAGAAATCCAAAACCTCACCGTTGCGGAGACCACGAACTGGCTCGCGACGCTGCAACCAAAGTGC
GGGTAGCGCTAGGTTGACGCGTCAATCGTCCGGGACGTCCTCCAAACTTTAGGTGAGGTCAATAGGACTGCTTTGAGAGCTCACCCGTTGCGGAGACCACGAACTGGCTCGCGACGCTGCAACCAAAGTGC
GGGTAGCGCTAGGTTGACGCGTCAATCGTCCGGGACGTCCTCCAAACTATCCCTGTAAATTGGCAACTACCCAACTAACTGCCCCCGTTGCGGAGACCACGAACTGGCTCGCGACGCTGCAACCAAAGTGC
GGGTAGCGCTAGGTTGACGCGTCAATCGTCCGGGACGTCCTCCAAACTATCCCGAAAAGGGACAAGTGCTATGTGCTGTGCCCGTTGCGGAGACCACGAACTGGCTCGCGACGCTGCAACCAAAGTGC
GGGTAGCGCTAGGTTGACGCGTCAATCGTCCGGGACGTCCTCCAAACTCTGAAAGCCGCACTTTCTTTGCCTTGTTACAAAGGCCGTTGCGGAGACCACGAACTGGCTCGCGACGCTGCAACCAAAGTGC
GGGTAGCGCTAGGTTGACGCGTCAATCGTCCGGGACGTCCTCCAAACCCCCAAAACAGCAGCTAGCCTTCACCTACCCCGTTGCGGAGACCACGAACTGGCTCGCGACGCTGCAACCAAAGTGC
GGGTAGCGCTAGGTTGACGCGTCAATCGTCCGGGACGTCCTCCAAACTGAGCTCCAGGTCCTGTCCATCCTCAGAAGCCGTTGCGGAGACCACGAACTGGCTCGCGACGCTGCAACCAAAGTGC
GGGTAGCGCTAGGTTGACGCGTCAATCGTCCGGGACGTCCTCCAAACGGAGTGCGAAGGGGCTGGATGATCCCTTGACCGTTGCGGAGACCACGAACTGGCTCGCGACGCTGCAACCAAAGTGC
GGGTAGCGCTAGGTTGACGCGTCAATCGTCCGGGACGTCCTCCAAACTGTCTGGCTGAGCGGCCAACACCCTAATGCCCGTTGCGGAGACCACGAACTGGCTCGCGACGCTGCAACCAAAGTGC
GGGTAGCGCTAGGTTGACGCGTCAATCGTCCGGGACGTCCTCCAAACTCAAGGCGACAGCCCCAAATGCTGGGCTCTCCGTTGCGGAGACCACGAACTGGCTCGCGACGCTGCAACCAAAGTGC
GGGTAGCGCTAGGTTGACGCGTCAATCGTCCGGGACGTCCTCCAAACTGCCCCAACACTCATCACCTCCCTTGTGTGCCGTTGCGGAGACCACGAACTGGCTCGCGACGCTGCAACCAAAGTGC
GGGTAGCGCTAGGTTGACGCGTCAATCGTCCGGGACGTCCTCCAAACAAGGAAAGACTACAGCCCATCTCCAGACTGAGGTCCGTTGCGGAGACCACGAACTGGCTCGCGACGCTGCAACCAAAGTGC
GGGTAGCGCTAGGTTGACGCGTCAATCGTCCGGGACGTCCTCCAAACTTGGCTTTTAGTTTGAGAAGAGAAAACCAGTGGCCTGCCGTTGCGGAGACCACGAACTGGCTCGCGACGCTGCAACCAAAGTGC
GGGTAGCGCTAGGTTGACGCGTCAATCGTCCGGGACGTCCTCCAAACTTACCTCAGAAAACTCTTCCCGGTGAGAGGCCCCGTTGCGGAGACCACGAACTGGCTCGCGACGCTGCAACCAAAGTGC
GGGTAGCGCTAGGTTGACGCGTCAATCGTCCGGGACGTCCTCCAAACAGCTCTTCTGCTCTGATTGCCACATGGAGATTTTGCCCGTTGCGGAGACCACGAACTGGCTCGCGACGCTGCAACCAAAGTGC
GGGTAGCGCTAGGTTGACGCGTCAATCGTCCGGGACGTCCTCCAAACTCCAGCAAAATATTTGCGTGAGAGGATGTTTCAGCTGCCGTTGCGGAGACCACGAACTGGCTCGCGACGCTGCAACCAAAGTGC
GGGTAGCGCTAGGTTGACGCGTCAATCGTCCGGGACGTCCTCCAAACTGGATTATTAGCTGTCTTGCCCCAGCATCTATTCTGCCCGTTGCGGAGACCACGAACTGGCTCGCGACGCTGCAACCAAAGTGC
GGGTAGCGCTAGGTTGACGCGTCAATCGTCCGGGACGTCCTCCAAACTTTAGTGGCTTCTATCCTCCAACCCCGCTGACCGTTGCGGAGACCACGAACTGGCTCGCGACGCTGCAACCAAAGTGC
GGGTAGCGCTAGGTTGACGCGTCAATCGTCCGGGACGTCCTCCAAACAAGTGACTCAAGGCACTACAGATTCCAAATGCAGCCCGTTGCGGAGACCACGAACTGGCTCGCGACGCTGCAACCAAAGTGC
GGGTAGCGCTAGGTTGACGCGTCAATCGTCCGGGACGTCCTCCAAACCTGCCAGATTAAGCAGAGAAACTGCAGGAAGCACCGTTGCGGAGACCACGAACTGGCTCGCGACGCTGCAACCAAAGTGC
GGGTAGCGCTAGGTTGACGCGTCAATCGTCCGGGACGTCCTCCAAACTCCCTACATTGTGAGAGGAAAGTCAGTGCAGTTCCCCGTTGCGGAGACCACGAACTGGCTCGCGACGCTGCAACCAAAGTGC
GGGTAGCGCTAGGTTGACGCGTCAATCGTCCGGGACGTCCTCCAAACATCTCCTTGGATGCTCTCTCTGTACCTATGCATACCACCGTTGCGGAGACCACGAACTGGCTCGCGACGCTGCAACCAAAGTGC
GGGTAGCGCTAGGTTGACGCGTCAATCGTCCGGGACGTCCTCCAAACTTCTTATCAAGTGCCTCATAGTTTGCAGCTTCCCAGACCGTTGCGGAGACCACGAACTGGCTCGCGACGCTGCAACCAAAGTGC
GGGTAGCGCTAGGTTGACGCGTCAATCGTCCGGGACGTCCTCCAAACAAAGAGTGTCTCTGAGGCTTAAGCCCAGAAGCTCCGTTGCGGAGACCACGAACTGGCTCGCGACGCTGCAACCAAAGTGC
GGGTAGCGCTAGGTTGACGCGTCAATCGTCCGGGACGTCCTCCAAACACTGGAACTTTCCATTTGTTAACTGTCTCTCAGCCCTCCGTTGCGGAGACCACGAACTGGCTCGCGACGCTGCAACCAAAGTGC
GGGTAGCGCTAGGTTGACGCGTCAATCGTCCGGGACGTCCTCCAAACATTTCAATAGCTGCCATTTAGCAAGCTGCCATGAAGACCGTTGCGGAGACCACGAACTGGCTCGCGACGCTGCAACCAAAGTGC
GGGTAGCGCTAGGTTGACGCGTCAATCGTCCGGGACGTCCTCCAAACAGCCATCTCCATCTGATTCATTTGGGGCTACAATTCACCGTTGCGGAGACCACGAACTGGCTCGCGACGCTGCAACCAAAGTGC
GGGTAGCGCTAGGTTGACGCGTCAATCGTCCGGGACGTCCTCCAAACCAATCCTTCTGGAATCCACAAATGCCAAAGCATTTGCCCGTTGCGGAGACCACGAACTGGCTCGCGACGCTGCAACCAAAGTGC
GGGTAGCGCTAGGTTGACGCGTCAATCGTCCGGGACGTCCTCCAAACAAAAGCAGCCTGGAACCAAGGTGTAATGAAGCACCGTTGCGGAGACCACGAACTGGCTCGCGACGCTGCAACCAAAGTGC
GGGTAGCGCTAGGTTGACGCGTCAATCGTCCGGGACGTCCTCCAAACTTTCACCGGTCCCACTGGACAGGGCTGTGACCGTTGCGGAGACCACGAACTGGCTCGCGACGCTGCAACCAAAGTGC
GGGTAGCGCTAGGTTGACGCGTCAATCGTCCGGGACGTCCTCCAAACTCTTACCCAGTTGGCACAGATACATAGCAACTGAACACCGTTGCGGAGACCACGAACTGGCTCGCGACGCTGCAACCAAAGTGC
GGGTAGCGCTAGGTTGACGCGTCAATCGTCCGGGACGTCCTCCAAACTACTAGTGTTGTTTTCACTAGCAGCTTGTACAGGGCCCCGTTGCGGAGACCACGAACTGGCTCGCGACGCTGCAACCAAAGTGC
GGGTAGCGCTAGGTTGACGCGTCAATCGTCCGGGACGTCCTCCAAACATCTCAGGGAGACCAAACAAATCTTCAGAAGCAACCCCCGTTGCGGAGACCACGAACTGGCTCGCGACGCTGCAACCAAAGTGC
GGGTAGCGCTAGGTTGACGCGTCAATCGTCCGGGACGTCCTCCAAACGCATGTGGAGAAACCATGTTGCAGAGTTTGAAACCTCCGTTGCGGAGACCACGAACTGGCTCGCGACGCTGCAACCAAAGTGC
GGGTAGCGCTAGGTTGACGCGTCAATCGTCCGGGACGTCCTCCAAACAGATGGAGTAAGCAAAATCATCCTCCTAGCTCAGCTGCCGTTGCGGAGACCACGAACTGGCTCGCGACGCTGCAACCAAAGTGC
GGGTAGCGCTAGGTTGACGCGTCAATCGTCCGGGACGTCCTCCAAACCCTGGGAAACTTGAGCCCCTGGCACCTGAACCGTTGCGGAGACCACGAACTGGCTCGCGACGCTGCAACCAAAGTGC
GGGTAGCGCTAGGTTGACGCGTCAATCGTCCGGGACGTCCTCCAAACCATCACCACGGCTCCAAGCAATGACACCATCCGTTGCGGAGACCACGAACTGGCTCGCGACGCTGCAACCAAAGTGC
GGGTAGCGCTAGGTTGACGCGTCAATCGTCCGGGACGTCCTCCAAACTTTTCTGCCTAACTCCTTCTGTCACCTGCCTCTCCGTTGCGGAGACCACGAACTGGCTCGCGACGCTGCAACCAAAGTGC
GGGTAGCGCTAGGTTGACGCGTCAATCGTCCGGGACGTCCTCCAAACTAGAAGATTGGTACCTCTCTCAGCAAGTCCATCTGGTCCGTTGCGGAGACCACGAACTGGCTCGCGACGCTGCAACCAAAGTGC
GGGTAGCGCTAGGTTGACGCGTCAATCGTCCGGGACGTCCTCCAAACTAGCAATTTGAAAGATGGGAAGAGTGGCACAAAGTGGCCGTTGCGGAGACCACGAACTGGCTCGCGACGCTGCAACCAAAGTGC
GGGTAGCGCTAGGTTGACGCGTCAATCGTCCGGGACGTCCTCCAAACAAAAGCAACAGCTTCCCTTTCACTGCAGCAGCCCGTTGCGGAGACCACGAACTGGCTCGCGACGCTGCAACCAAAGTGC
GGGTAGCGCTAGGTTGACGCGTCAATCGTCCGGGACGTCCTCCAAACAAGGTAATGGATCATTTCAGGGCATTCAGATCTGGCCCCGTTGCGGAGACCACGAACTGGCTCGCGACGCTGCAACCAAAGTGC
GGGTAGCGCTAGGTTGACGCGTCAATCGTCCGGGACGTCCTCCAAACTTCTTAATGTTCACAACCTGGAGGGAGTGAACAAGGCCCGTTGCGGAGACCACGAACTGGCTCGCGACGCTGCAACCAAAGTGC
GGGTAGCGCTAGGTTGACGCGTCAATCGTCCGGGACGTCCTCCAAACGATTCCTGCTATTTTAAGAAGCAGTGGTGGTTGTGCCCCGTTGCGGAGACCACGAACTGGCTCGCGACGCTGCAACCAAAGTGC
GGGTAGCGCTAGGTTGACGCGTCAATCGTCCGGGACGTCCTCCAAACTTTTAGCTATGAGTCGGATTTGCAGCATTCTCCTCCCCCGTTGCGGAGACCACGAACTGGCTCGCGACGCTGCAACCAAAGTGC
GGGTAGCGCTAGGTTGACGCGTCAATCGTCCGGGACGTCCTCCAAACAGTCTGTGGCTAGAATAGCGTTTTCCAAACTATGGGCCCGTTGCGGAGACCACGAACTGGCTCGCGACGCTGCAACCAAAGTGC
GGGTAGCGCTAGGTTGACGCGTCAATCGTCCGGGACGTCCTCCAAACCAAGCAGCTATATAGTCAACCAGGAAGACTGACCTGGCCGTTGCGGAGACCACGAACTGGCTCGCGACGCTGCAACCAAAGTGC
GGGTAGCGCTAGGTTGACGCGTCAATCGTCCGGGACGTCCTCCAAACTGGAGCCCTTGATATACATTAAGTCCTGAGCTCAGCACCGTTGCGGAGACCACGAACTGGCTCGCGACGCTGCAACCAAAGTGC
GGGTAGCGCTAGGTTGACGCGTCAATCGTCCGGGACGTCCTCCAAACGTTGCAAGTGTCATTCCAGTGAGGAAGATGGAAGGCCGTTGCGGAGACCACGAACTGGCTCGCGACGCTGCAACCAAAGTGC
GGGTAGCGCTAGGTTGACGCGTCAATCGTCCGGGACGTCCTCCAAACGAAATGTAGGAAATGCCGAAGAAGCACGAGCCACCGTTGCGGAGACCACGAACTGGCTCGCGACGCTGCAACCAAAGTGC
GGGTAGCGCTAGGTTGACGCGTCAATCGTCCGGGACGTCCTCCAAACGGGGCCACTGTCATTCCCCTGTCCCTTATTCCGTTGCGGAGACCACGAACTGGCTCGCGACGCTGCAACCAAAGTGC
GGGTAGCGCTAGGTTGACGCGTCAATCGTCCGGGACGTCCTCCAAACATAAGAGCGATTGCTATAGAGGCTGCTGAGCAAATGGCCGTTGCGGAGACCACGAACTGGCTCGCGACGCTGCAACCAAAGTGC
GGGTAGCGCTAGGTTGACGCGTCAATCGTCCGGGACGTCCTCCAAACTTTTGTGCCCACAAAATCACAAGAATGAAGTGAGGCTCCGTTGCGGAGACCACGAACTGGCTCGCGACGCTGCAACCAAAGTGC
GGGTAGCGCTAGGTTGACGCGTCAATCGTCCGGGACGTCCTCCAAACTTAGCTGGGCTGGCATCAGTCATCTGTCACCCCGTTGCGGAGACCACGAACTGGCTCGCGACGCTGCAACCAAAGTGC
GGGTAGCGCTAGGTTGACGCGTCAATCGTCCGGGACGTCCTCCAAACTGCATAGGCTGGGGTTCAGCAGTGCACAGCCCGTTGCGGAGACCACGAACTGGCTCGCGACGCTGCAACCAAAGTGC
GGGTAGCGCTAGGTTGACGCGTCAATCGTCCGGGACGTCCTCCAAACGAGAGGGAGATCATTTGGCAAGGGCAGGGACCGTTGCGGAGACCACGAACTGGCTCGCGACGCTGCAACCAAAGTGC
GGGTAGCGCTAGGTTGACGCGTCAATCGTCCGGGACGTCCTCCAAACGGGGCATATAAGCATCGGGAGGTGAGCCAGCCGTTGCGGAGACCACGAACTGGCTCGCGACGCTGCAACCAAAGTGC
GGGTAGCGCTAGGTTGACGCGTCAATCGTCCGGGACGTCCTCCAAACAGTCAGAAGTCAGCTCAGAGGCCTTCACATCCCCGTTGCGGAGACCACGAACTGGCTCGCGACGCTGCAACCAAAGTGC
GGGTAGCGCTAGGTTGACGCGTCAATCGTCCGGGACGTCCTCCAAACAGCCCAGATCAGGAGCTAAGTAAAGGTGGCACCGTTGCGGAGACCACGAACTGGCTCGCGACGCTGCAACCAAAGTGC
GGGTAGCGCTAGGTTGACGCGTCAATCGTCCGGGACGTCCTCCAAACGGGGCCATCCAGGACTTCATGAGACATCCACCGTTGCGGAGACCACGAACTGGCTCGCGACGCTGCAACCAAAGTGC
GGGTAGCGCTAGGTTGACGCGTCAATCGTCCGGGACGTCCTCCAAACGGCCCACTTTAACTGGGCCCTTAACTGGAGCCGTTGCGGAGACCACGAACTGGCTCGCGACGCTGCAACCAAAGTGC
GGGTAGCGCTAGGTTGACGCGTCAATCGTCCGGGACGTCCTCCAAACAGAGCCACACTAGGTACACAGATTCTAAAGACAGGGACCGTTGCGGAGACCACGAACTGGCTCGCGACGCTGCAACCAAAGTGC
GGGTAGCGCTAGGTTGACGCGTCAATCGTCCGGGACGTCCTCCAAACTACTTGTACCCAGGGTACCCACTTCACAGCCCCGTTGCGGAGACCACGAACTGGCTCGCGACGCTGCAACCAAAGTGC
GGGTAGCGCTAGGTTGACGCGTCAATCGTCCGGGACGTCCTCCAAACACACTCCCAGTTCTTTCTCCCTGTCCAAGAGGCCGTTGCGGAGACCACGAACTGGCTCGCGACGCTGCAACCAAAGTGC
GGGTAGCGCTAGGTTGACGCGTCAATCGTCCGGGACGTCCTCCAAACAACTAGTCACTCCTACTGTACTGCAGTGCTTCTCACACCGTTGCGGAGACCACGAACTGGCTCGCGACGCTGCAACCAAAGTGC
GGGTAGCGCTAGGTTGACGCGTCAATCGTCCGGGACGTCCTCCAAACCTCACAGCCACTCGGCGGGAATATGTCAGGCCGTTGCGGAGACCACGAACTGGCTCGCGACGCTGCAACCAAAGTGC
GGGTAGCGCTAGGTTGACGCGTCAATCGTCCGGGACGTCCTCCAAACAGCTTAAACACTCAGCCTCCTGCTAGGAAAGAGAAACCCGTTGCGGAGACCACGAACTGGCTCGCGACGCTGCAACCAAAGTGC
GGGTAGCGCTAGGTTGACGCGTCAATCGTCCGGGACGTCCTCCAAACTGTAGGTGAAGGGACAGGGACATATTCAAGGAAAAGCCCGTTGCGGAGACCACGAACTGGCTCGCGACGCTGCAACCAAAGTGC
GGGTAGCGCTAGGTTGACGCGTCAATCGTCCGGGACGTCCTCCAAACACCAGTGAGGGAACTTAAAGATGACCAGAAAAGGGAGCCGTTGCGGAGACCACGAACTGGCTCGCGACGCTGCAACCAAAGTGC
GGGTAGCGCTAGGTTGACGCGTCAATCGTCCGGGACGTCCTCCAAACTTTTGTGGCAGCATCTGGAACTGCCTGGAGCCGTTGCGGAGACCACGAACTGGCTCGCGACGCTGCAACCAAAGTGC
GGGTAGCGCTAGGTTGACGCGTCAATCGTCCGGGACGTCCTCCAAACTGCTGCTAATCTCTCACCCTGCACTATAAACTTGTGGCCGTTGCGGAGACCACGAACTGGCTCGCGACGCTGCAACCAAAGTGC
GGGTAGCGCTAGGTTGACGCGTCAATCGTCCGGGACGTCCTCCAAACTTTGCATCAAAGATTACCTGTCTGTCTTCCCCATGGGCCGTTGCGGAGACCACGAACTGGCTCGCGACGCTGCAACCAAAGTGC
GGGTAGCGCTAGGTTGACGCGTCAATCGTCCGGGACGTCCTCCAAACCCCCTTCAAACACACCCTCAAAACCAGGGACCGTTGCGGAGACCACGAACTGGCTCGCGACGCTGCAACCAAAGTGC
GGGTAGCGCTAGGTTGACGCGTCAATCGTCCGGGACGTCCTCCAAACTCCTTCCACTTTCTCATACCCTATTTTGCAATCCCCACCGTTGCGGAGACCACGAACTGGCTCGCGACGCTGCAACCAAAGTGC
GGGTAGCGCTAGGTTGACGCGTCAATCGTCCGGGACGTCCTCCAAACACACTAATCTCCTTTCAAGGGTCTCTCTCTGTTCCCACCGTTGCGGAGACCACGAACTGGCTCGCGACGCTGCAACCAAAGTGC
GGGTAGCGCTAGGTTGACGCGTCAATCGTCCGGGACGTCCTCCAAACTCACATTCAGTATCTATTGGGACCTCAGGAAGTGGCTCCGTTGCGGAGACCACGAACTGGCTCGCGACGCTGCAACCAAAGTGC
GGGTAGCGCTAGGTTGACGCGTCAATCGTCCGGGACGTCCTCCAAACAGTATTGTATGGTGGGTCCATCAAGCATGACAATGGACCGTTGCGGAGACCACGAACTGGCTCGCGACGCTGCAACCAAAGTGC
GGGTAGCGCTAGGTTGACGCGTCAATCGTCCGGGACGTCCTCCAAACGTGAGGACGAGGTAAGTCAGGGCTCAGAGTCCGTTGCGGAGACCACGAACTGGCTCGCGACGCTGCAACCAAAGTGC
GGGTAGCGCTAGGTTGACGCGTCAATCGTCCGGGACGTCCTCCAAACCAGAGGAGCCTTGTCTTCCATGCGTTTGTTGCCCGTTGCGGAGACCACGAACTGGCTCGCGACGCTGCAACCAAAGTGC
GGGTAGCGCTAGGTTGACGCGTCAATCGTCCGGGACGTCCTCCAAACTGGGATTGCCAAAATGCCTGCGGAGATACACCGTTGCGGAGACCACGAACTGGCTCGCGACGCTGCAACCAAAGTGC
GGGTAGCGCTAGGTTGACGCGTCAATCGTCCGGGACGTCCTCCAAACGGTCGCGTCTCAGCCATGCAGGCCACAAACCCGTTGCGGAGACCACGAACTGGCTCGCGACGCTGCAACCAAAGTGC
GGGTAGCGCTAGGTTGACGCGTCAATCGTCCGGGACGTCCTCCAAACGGGGAACTGGGAGCCGGAGGAATTCTGAGCCCGTTGCGGAGACCACGAACTGGCTCGCGACGCTGCAACCAAAGTGC
GGGTAGCGCTAGGTTGACGCGTCAATCGTCCGGGACGTCCTCCAAACTCTGTCTCAGATCCACAGAAAGGGTGATTTACTTGCCCCGTTGCGGAGACCACGAACTGGCTCGCGACGCTGCAACCAAAGTGC
GGGTAGCGCTAGGTTGACGCGTCAATCGTCCGGGACGTCCTCCAAACTGCTTACGCAAAAGCTAACAGATGACCTAGATGGCCCCGTTGCGGAGACCACGAACTGGCTCGCGACGCTGCAACCAAAGTGC
GGGTAGCGCTAGGTTGACGCGTCAATCGTCCGGGACGTCCTCCAAACTCTCCTCCAATGAGCAAGAAACCAAAAGCTATCACCGCCGTTGCGGAGACCACGAACTGGCTCGCGACGCTGCAACCAAAGTGC
GGGTAGCGCTAGGTTGACGCGTCAATCGTCCGGGACGTCCTCCAAACAACTGGCAGAAAAGTTGGTATCTCAGGGAATCACACACCGTTGCGGAGACCACGAACTGGCTCGCGACGCTGCAACCAAAGTGC
GGGTAGCGCTAGGTTGACGCGTCAATCGTCCGGGACGTCCTCCAAACTTAAATGCGTTTCTCATGGACACATCCTGGAATCCCCCCGTTGCGGAGACCACGAACTGGCTCGCGACGCTGCAACCAAAGTGC
GGGTAGCGCTAGGTTGACGCGTCAATCGTCCGGGACGTCCTCCAAACCCCCATACCCCTATCAGTGCCTATAACAATCTCCTCCCCGTTGCGGAGACCACGAACTGGCTCGCGACGCTGCAACCAAAGTGC
GGGTAGCGCTAGGTTGACGCGTCAATCGTCCGGGACGTCCTCCAAACAGTGTCCCCTATCATATGCCAAAAGCAGAAGTAGGTCCCGTTGCGGAGACCACGAACTGGCTCGCGACGCTGCAACCAAAGTGC
GGGTAGCGCTAGGTTGACGCGTCAATCGTCCGGGACGTCCTCCAAACTTTGCATGAGCTGAAGTAGGACAAGAAATTCCCCACACCGTTGCGGAGACCACGAACTGGCTCGCGACGCTGCAACCAAAGTGC
GGGTAGCGCTAGGTTGACGCGTCAATCGTCCGGGACGTCCTCCAAACCTATTATGGTCGAGAAAGGACAAGAATGGGACCCAGGCCGTTGCGGAGACCACGAACTGGCTCGCGACGCTGCAACCAAAGTGC
GGGTAGCGCTAGGTTGACGCGTCAATCGTCCGGGACGTCCTCCAAACTGGATTACTTTTCTCTGCTGTCTTTTCTCCGGAACGTCCGTTGCGGAGACCACGAACTGGCTCGCGACGCTGCAACCAAAGTGC
GGGTAGCGCTAGGTTGACGCGTCAATCGTCCGGGACGTCCTCCAAACTTTAGAGCACATGAAAGGAGTACCCAGAAAGGACAGGCCGTTGCGGAGACCACGAACTGGCTCGCGACGCTGCAACCAAAGTGC
GGGTAGCGCTAGGTTGACGCGTCAATCGTCCGGGACGTCCTCCAAACACAGGGTAGGGCCTTGAACTTGAGGACTCTCCGTTGCGGAGACCACGAACTGGCTCGCGACGCTGCAACCAAAGTGC
GGGTAGCGCTAGGTTGACGCGTCAATCGTCCGGGACGTCCTCCAAACGCATATGGCTGCAGAGGGTCACCAAGCTCTCCGTTGCGGAGACCACGAACTGGCTCGCGACGCTGCAACCAAAGTGC
GGGTAGCGCTAGGTTGACGCGTCAATCGTCCGGGACGTCCTCCAAACATTAAAGGGAAGTGCTGAAAGAAAGGGATGTGGCAAGCCGTTGCGGAGACCACGAACTGGCTCGCGACGCTGCAACCAAAGTGC
GGGTAGCGCTAGGTTGACGCGTCAATCGTCCGGGACGTCCTCCAAACAGTAGTGGCAACAGCAATAATAGTAGAAGTGGCAGCAGAACGGCCCTAAGCCTCACCGAGCAGCCGACGCTGCAACCAAAGTGC
GGGTAGCGCTAGGTTGACGCGTCAATCGTCCGGGACGTCCTCCAAACGCCACAGTAATATGTGGCTTGTAAACCTAAGGAGGCAGAACGGCCCTAAGCCTCACCGAGCAGCCGACGCTGCAACCAAAGTGC
GGGTAGCGCTAGGTTGACGCGTCAATCGTCCGGGACGTCCTCCAAACTGTAGCCTCCCAACTAGCAACTTTCAATAACTGCACCGAACGGCCCTAAGCCTCACCGAGCAGCCGACGCTGCAACCAAAGTGC
GGGTAGCGCTAGGTTGACGCGTCAATCGTCCGGGACGTCCTCCAAACACTCAGATGGCACATATTTTCCAAAGAGTTCCCTCCAGAACGGCCCTAAGCCTCACCGAGCAGCCGACGCTGCAACCAAAGTGC
GGGTAGCGCTAGGTTGACGCGTCAATCGTCCGGGACGTCCTCCAAACTGACCATAAATTTTGGGCTGTATGGTCTGGTCTCTGGGAACGGCCCTAAGCCTCACCGAGCAGCCGACGCTGCAACCAAAGTGC
GGGTAGCGCTAGGTTGACGCGTCAATCGTCCGGGACGTCCTCCAAACACGGATGAACCAAACAGATATAGCAGACCAACAGGAGAACGGCCCTAAGCCTCACCGAGCAGCCGACGCTGCAACCAAAGTGC
GGGTAGCGCTAGGTTGACGCGTCAATCGTCCGGGACGTCCTCCAAACTTGGATTCTCGAAACTACTTCCAGCTAAGGGACACACGAACGGCCCTAAGCCTCACCGAGCAGCCGACGCTGCAACCAAAGTGC
GGGTAGCGCTAGGTTGACGCGTCAATCGTCCGGGACGTCCTCCAAACTTTCCCTTGTAAGCACATAATAACAGCTGTGCAACCCGAACGGCCCTAAGCCTCACCGAGCAGCCGACGCTGCAACCAAAGTGC
GGGTAGCGCTAGGTTGACGCGTCAATCGTCCGGGACGTCCTCCAAACATCAGTCCACATGCCACGGTGATGGCCTGTGAACGGCCCTAAGCCTCACCGAGCAGCCGACGCTGCAACCAAAGTGC
GGGTAGCGCTAGGTTGACGCGTCAATCGTCCGGGACGTCCTCCAAACTGTCATCTTTCTGGGTAACCATTTCCAAAGCTGGTGAGAACGGCCCTAAGCCTCACCGAGCAGCCGACGCTGCAACCAAAGTGC
GGGTAGCGCTAGGTTGACGCGTCAATCGTCCGGGACGTCCTCCAAACGCAGAGTCTAAAGCCAACTCAGCATAGCCATCCAGAACGGCCCTAAGCCTCACCGAGCAGCCGACGCTGCAACCAAAGTGC
GGGTAGCGCTAGGTTGACGCGTCAATCGTCCGGGACGTCCTCCAAACGCATCCTCCTCATCCATCAGCTGCATGTCTTCGAACGGCCCTAAGCCTCACCGAGCAGCCGACGCTGCAACCAAAGTGC
GGGTAGCGCTAGGTTGACGCGTCAATCGTCCGGGACGTCCTCCAAACCCAAGGTGCTAAGCAATGACCTTCCTCCATGAACGAACGGCCCTAAGCCTCACCGAGCAGCCGACGCTGCAACCAAAGTGC
GGGTAGCGCTAGGTTGACGCGTCAATCGTCCGGGACGTCCTCCAAACTCAAGCTTTGTCTTCCCAATATATACCACGATCCCCGGAACGGCCCTAAGCCTCACCGAGCAGCCGACGCTGCAACCAAAGTGC
GGGTAGCGCTAGGTTGACGCGTCAATCGTCCGGGACGTCCTCCAAACAAAGTGCCTGTACTACAGTGTAGAGATGGAAGAGCCCGAACGGCCCTAAGCCTCACCGAGCAGCCGACGCTGCAACCAAAGTGC
GGGTAGCGCTAGGTTGACGCGTCAATCGTCCGGGACGTCCTCCAAACAAGCTGGTGAGACGACCATTCTGTGTTGTGCGAACGGCCCTAAGCCTCACCGAGCAGCCGACGCTGCAACCAAAGTGC
GGGTAGCGCTAGGTTGACGCGTCAATCGTCCGGGACGTCCTCCAAACTCTGGTTACCTGCTCATCTCAGTACAGGTATACAGCAGAACGGCCCTAAGCCTCACCGAGCAGCCGACGCTGCAACCAAAGTGC
GGGTAGCGCTAGGTTGACGCGTCAATCGTCCGGGACGTCCTCCAAACTGGTCCTGGAAGTGCAGAGGTGCTTTAGGGGAACGGCCCTAAGCCTCACCGAGCAGCCGACGCTGCAACCAAAGTGC
GGGTAGCGCTAGGTTGACGCGTCAATCGTCCGGGACGTCCTCCAAACACCAGCCAACCCATGAATAAGTGGGCTCTTCGAACGGCCCTAAGCCTCACCGAGCAGCCGACGCTGCAACCAAAGTGC
GGGTAGCGCTAGGTTGACGCGTCAATCGTCCGGGACGTCCTCCAAACTTGGGAGGCAGTATTCCTGCACATACAATAGGAAAGGGAACGGCCCTAAGCCTCACCGAGCAGCCGACGCTGCAACCAAAGTGC
GGGTAGCGCTAGGTTGACGCGTCAATCGTCCGGGACGTCCTCCAAACATGGGCCAAACATCTCCAAGCCTTATATCTTCTCAGGGAACGGCCCTAAGCCTCACCGAGCAGCCGACGCTGCAACCAAAGTGC
GGGTAGCGCTAGGTTGACGCGTCAATCGTCCGGGACGTCCTCCAAACATTCTTGGTGTATGTCAGTGGCCCATCATACAAGACCGAACGGCCCTAAGCCTCACCGAGCAGCCGACGCTGCAACCAAAGTGC
GGGTAGCGCTAGGTTGACGCGTCAATCGTCCGGGACGTCCTCCAAACCACATGTGGCATAGCACATGATATTGTGGAGGCAGAACGGCCCTAAGCCTCACCGAGCAGCCGACGCTGCAACCAAAGTGC
GGGTAGCGCTAGGTTGACGCGTCAATCGTCCGGGACGTCCTCCAAACAAAGAGAGGAAAAGAGGGTCTATAATGGCCCTCCAGAGAACGGCCCTAAGCCTCACCGAGCAGCCGACGCTGCAACCAAAGTGC
GGGTAGCGCTAGGTTGACGCGTCAATCGTCCGGGACGTCCTCCAAACTGAACACTAACTGCATGCTAGCAGCTTGATAAACGGAGAACGGCCCTAAGCCTCACCGAGCAGCCGACGCTGCAACCAAAGTGC
GGGTAGCGCTAGGTTGACGCGTCAATCGTCCGGGACGTCCTCCAAACAAAGCACTGGAAAACACGTACCAAACTGTTAGCAAGTGAACGGCCCTAAGCCTCACCGAGCAGCCGACGCTGCAACCAAAGTGC
GGGTAGCGCTAGGTTGACGCGTCAATCGTCCGGGACGTCCTCCAAACGGGAGTGAGGTTTGAGGGACTTGAGAGAAGACTAGCGAACGGCCCTAAGCCTCACCGAGCAGCCGACGCTGCAACCAAAGTGC
GGGTAGCGCTAGGTTGACGCGTCAATCGTCCGGGACGTCCTCCAAACAACTTCTCACAGAATCCTTTCCTTTGGACTTGAGGCCGAACGGCCCTAAGCCTCACCGAGCAGCCGACGCTGCAACCAAAGTGC
GGGTAGCGCTAGGTTGACGCGTCAATCGTCCGGGACGTCCTCCAAACTCTGAACCTGTGCTAATTGCACTCTGTCAGGAATTCGGAACGGCCCTAAGCCTCACCGAGCAGCCGACGCTGCAACCAAAGTGC
GGGTAGCGCTAGGTTGACGCGTCAATCGTCCGGGACGTCCTCCAAACATATTACAGGTGTCTGTGCTACCCAGAAAGCAAAGGGGAACGGCCCTAAGCCTCACCGAGCAGCCGACGCTGCAACCAAAGTGC
GGGTAGCGCTAGGTTGACGCGTCAATCGTCCGGGACGTCCTCCAAACTCTATCGCCTCAGTATTGTCGATTTCCACATCCACAGGAACGGCCCTAAGCCTCACCGAGCAGCCGACGCTGCAACCAAAGTGC
GGGTAGCGCTAGGTTGACGCGTCAATCGTCCGGGACGTCCTCCAAACCCTAACAACGTGGTGCAATCGCCCTTTGCGGAACGGCCCTAAGCCTCACCGAGCAGCCGACGCTGCAACCAAAGTGC
GGGTAGCGCTAGGTTGACGCGTCAATCGTCCGGGACGTCCTCCAAACGCAGACCAACAGACGGATGCTGCCCTGCTGGAACGGCCCTAAGCCTCACCGAGCAGCCGACGCTGCAACCAAAGTGC
GGGTAGCGCTAGGTTGACGCGTCAATCGTCCGGGACGTCCTCCAAACCAGTTTCACAGCACACCGGGTCTTTCCGCTGAACGGCCCTAAGCCTCACCGAGCAGCCGACGCTGCAACCAAAGTGC
GGGTAGCGCTAGGTTGACGCGTCAATCGTCCGGGACGTCCTCCAAACCCCAGCCAGGCCGTAGGGAGGATTCCGAAGGAACGGCCCTAAGCCTCACCGAGCAGCCGACGCTGCAACCAAAGTGC
GGGTAGCGCTAGGTTGACGCGTCAATCGTCCGGGACGTCCTCCAAACGTCTCTCTGCAGAGGACCGGCCTCTCAGACGAACGGCCCTAAGCCTCACCGAGCAGCCGACGCTGCAACCAAAGTGC
GGGTAGCGCTAGGTTGACGCGTCAATCGTCCGGGACGTCCTCCAAACCGAGAAGGCTCCACCCAGGCAGGAAAGGACGAACGGCCCTAAGCCTCACCGAGCAGCCGACGCTGCAACCAAAGTGC
GGGTAGCGCTAGGTTGACGCGTCAATCGTCCGGGACGTCCTCCAAACCCTGGGCCCCATGGCTCGTGTTTGTTGCTGGAACGGCCCTAAGCCTCACCGAGCAGCCGACGCTGCAACCAAAGTGC
GGGTAGCGCTAGGTTGACGCGTCAATCGTCCGGGACGTCCTCCAAACAATTGGGCAACGTGGGCTGCGGTTCACAGGGAACGGCCCTAAGCCTCACCGAGCAGCCGACGCTGCAACCAAAGTGC
GGGTAGCGCTAGGTTGACGCGTCAATCGTCCGGGACGTCCTCCAAACGCAACAGAGACTTCACCACCTAACACATCGGGGAACGGCCCTAAGCCTCACCGAGCAGCCGACGCTGCAACCAAAGTGC
GGGTAGCGCTAGGTTGACGCGTCAATCGTCCGGGACGTCCTCCAAACGTGCAGCTGAGGAGGGCTGCTTCTGCCTCTGAACGGCCCTAAGCCTCACCGAGCAGCCGACGCTGCAACCAAAGTGC
GGGTAGCGCTAGGTTGACGCGTCAATCGTCCGGGACGTCCTCCAAACCCTTTCCCAGGCTGGGCCCACAGGAAGTCTGAACGGCCCTAAGCCTCACCGAGCAGCCGACGCTGCAACCAAAGTGC
GGGTAGCGCTAGGTTGACGCGTCAATCGTCCGGGACGTCCTCCAAACGGAAGGGAGGAGGCACTGCAAGCTGTGGGAGAACGGCCCTAAGCCTCACCGAGCAGCCGACGCTGCAACCAAAGTGC
GGGTAGCGCTAGGTTGACGCGTCAATCGTCCGGGACGTCCTCCAAACACCACACCGGCTCCTTCACTGCTGACAAAGGAACGGCCCTAAGCCTCACCGAGCAGCCGACGCTGCAACCAAAGTGC
GGGTAGCGCTAGGTTGACGCGTCAATCGTCCGGGACGTCCTCCAAACCCCCACCGAGAAACTAGCTCAGAACCAGCTGAACGGCCCTAAGCCTCACCGAGCAGCCGACGCTGCAACCAAAGTGC
GGGTAGCGCTAGGTTGACGCGTCAATCGTCCGGGACGTCCTCCAAACCTCCTCCTCCGCAGCCCTCATGCCCTGAATGAACGGCCCTAAGCCTCACCGAGCAGCCGACGCTGCAACCAAAGTGC
GGGTAGCGCTAGGTTGACGCGTCAATCGTCCGGGACGTCCTCCAAACGGGGTGTGGGTGCCAGATCAACTTGCTCACGAACGGCCCTAAGCCTCACCGAGCAGCCGACGCTGCAACCAAAGTGC
GGGTAGCGCTAGGTTGACGCGTCAATCGTCCGGGACGTCCTCCAAACCACTCAGACCGCACACAAGAAGCCTTATGTTGAAGAACGGCCCTAAGCCTCACCGAGCAGCCGACGCTGCAACCAAAGTGC
GGGTAGCGCTAGGTTGACGCGTCAATCGTCCGGGACGTCCTCCAAACACTTGTTCAACCTCCAGTAACCAAGTCATGCAAGTGGGAACGGCCCTAAGCCTCACCGAGCAGCCGACGCTGCAACCAAAGTGC
GGGTAGCGCTAGGTTGACGCGTCAATCGTCCGGGACGTCCTCCAAACACAGGTTTCAGGTTGACAGGGTAGGAGTTTAGCTTGAACGGCCCTAAGCCTCACCGAGCAGCCGACGCTGCAACCAAAGTGC
GGGTAGCGCTAGGTTGACGCGTCAATCGTCCGGGACGTCCTCCAAACCCATGAATCAGCCCTGACAAACCAATACCAAGCAGAACGGCCCTAAGCCTCACCGAGCAGCCGACGCTGCAACCAAAGTGC
GGGTAGCGCTAGGTTGACGCGTCAATCGTCCGGGACGTCCTCCAAACAGCTACAGAGCAGTAATGAGTTCCCAACCTCCAAGAACGGCCCTAAGCCTCACCGAGCAGCCGACGCTGCAACCAAAGTGC
GGGTAGCGCTAGGTTGACGCGTCAATCGTCCGGGACGTCCTCCAAACAGGCAGCAGCAAGAAGCAAGGAAGAATGTCCGAACGGCCCTAAGCCTCACCGAGCAGCCGACGCTGCAACCAAAGTGC
GGGTAGCGCTAGGTTGACGCGTCAATCGTCCGGGACGTCCTCCAAACGAGCCCTGGTCTCCTCATGGCCACACTCCCGAACGGCCCTAAGCCTCACCGAGCAGCCGACGCTGCAACCAAAGTGC
GGGTAGCGCTAGGTTGACGCGTCAATCGTCCGGGACGTCCTCCAAACCTGTGCTTTTCTGTGGTTCCCATAAACCTCTGCAGAACGGCCCTAAGCCTCACCGAGCAGCCGACGCTGCAACCAAAGTGC
GGGTAGCGCTAGGTTGACGCGTCAATCGTCCGGGACGTCCTCCAAACGGCTCTGAAAGAGGTCAGAACCTCACATCCCAGAACGGCCCTAAGCCTCACCGAGCAGCCGACGCTGCAACCAAAGTGC
GGGTAGCGCTAGGTTGACGCGTCAATCGTCCGGGACGTCCTCCAAACGCAGAGGTAAATGTAGGGGCCAAGGATAGCACCGAACGGCCCTAAGCCTCACCGAGCAGCCGACGCTGCAACCAAAGTGC
GGGTAGCGCTAGGTTGACGCGTCAATCGTCCGGGACGTCCTCCAAACAAACCTGGACAGAGATGGGCCACAAGTGATGCGAACGGCCCTAAGCCTCACCGAGCAGCCGACGCTGCAACCAAAGTGC
GGGTAGCGCTAGGTTGACGCGTCAATCGTCCGGGACGTCCTCCAAACTTTCATAACAAAAGCCATCATCCTCTTCAGGGGCAGGGAACGGCCCTAAGCCTCACCGAGCAGCCGACGCTGCAACCAAAGTGC
GGGTAGCGCTAGGTTGACGCGTCAATCGTCCGGGACGTCCTCCAAACCCTCTAGAAGCCAAACATGTTTGTTGGTCACCATAGCGAACGGCCCTAAGCCTCACCGAGCAGCCGACGCTGCAACCAAAGTGC
GGGTAGCGCTAGGTTGACGCGTCAATCGTCCGGGACGTCCTCCAAACAACCATGAACTGCCTGCCACCCCTCCATTTGAACGGCCCTAAGCCTCACCGAGCAGCCGACGCTGCAACCAAAGTGC
GGGTAGCGCTAGGTTGACGCGTCAATCGTCCGGGACGTCCTCCAAACTTTTAAGGACTCCCAAGCCTGCAAAGAACAGATTGCGAACGGCCCTAAGCCTCACCGAGCAGCCGACGCTGCAACCAAAGTGC
GGGTAGCGCTAGGTTGACGCGTCAATCGTCCGGGACGTCCTCCAAACAATTGGCTTTAGCATCTTTTCACCCTTTGCTGTTCCCGAACGGCCCTAAGCCTCACCGAGCAGCCGACGCTGCAACCAAAGTGC
GGGTAGCGCTAGGTTGACGCGTCAATCGTCCGGGACGTCCTCCAAACTTCTCTGCGGTTGTACACAGGTTCAATGCCCGAACGGCCCTAAGCCTCACCGAGCAGCCGACGCTGCAACCAAAGTGC
GGGTAGCGCTAGGTTGACGCGTCAATCGTCCGGGACGTCCTCCAAACATGAAGTATCCACATGACCGCCATGAAGCAGAATTCAGAACGGCCCTAAGCCTCACCGAGCAGCCGACGCTGCAACCAAAGTGC
GGGTAGCGCTAGGTTGACGCGTCAATCGTCCGGGACGTCCTCCAAACAATTTCCACTGCTGTCCCATCTGCCTGAAGTAAGCGAACGGCCCTAAGCCTCACCGAGCAGCCGACGCTGCAACCAAAGTGC
GGGTAGCGCTAGGTTGACGCGTCAATCGTCCGGGACGTCCTCCAAACTAATTGCTGTCAGAGATAGTTTGACCCCTGTCCTTGGGAACGGCCCTAAGCCTCACCGAGCAGCCGACGCTGCAACCAAAGTGC
GGGTAGCGCTAGGTTGACGCGTCAATCGTCCGGGACGTCCTCCAAACTGGAGAAAACTCATATTCCCAAAGGAATGGGTGTGGTGAACGGCCCTAAGCCTCACCGAGCAGCCGACGCTGCAACCAAAGTGC
GGGTAGCGCTAGGTTGACGCGTCAATCGTCCGGGACGTCCTCCAAACAGGAAGATTCCTTTCTGTAACATACAGGACCACGTGGGAACGGCCCTAAGCCTCACCGAGCAGCCGACGCTGCAACCAAAGTGC
GGGTAGCGCTAGGTTGACGCGTCAATCGTCCGGGACGTCCTCCAAACTCAGCAATTGGAGAAGTTTGTCTTCTCTTCAGTCCCTGAACGGCCCTAAGCCTCACCGAGCAGCCGACGCTGCAACCAAAGTGC
GGGTAGCGCTAGGTTGACGCGTCAATCGTCCGGGACGTCCTCCAAACGCTTTGACTTCCTTCCCCTCACACATACACCTCAGAACGGCCCTAAGCCTCACCGAGCAGCCGACGCTGCAACCAAAGTGC
GGGTAGCGCTAGGTTGACGCGTCAATCGTCCGGGACGTCCTCCAAACCCCTCCCATTGATTGCTCCACCTGCTCCCCGAACGGCCCTAAGCCTCACCGAGCAGCCGACGCTGCAACCAAAGTGC
GGGTAGCGCTAGGTTGACGCGTCAATCGTCCGGGACGTCCTCCAAACCCCCTAAGGCATTCTCTGCCTCCCCTCTTCGAACGGCCCTAAGCCTCACCGAGCAGCCGACGCTGCAACCAAAGTGC
GGGTAGCGCTAGGTTGACGCGTCAATCGTCCGGGACGTCCTCCAAACACTCTGTCTCTTTGGTGGATATGCAAGTGAGAGAGCGAACGGCCCTAAGCCTCACCGAGCAGCCGACGCTGCAACCAAAGTGC
GGGTAGCGCTAGGTTGACGCGTCAATCGTCCGGGACGTCCTCCAAACATATCTTTGATGCAGGGGTGGAGTAGGGGTACAGGGAACGGCCCTAAGCCTCACCGAGCAGCCGACGCTGCAACCAAAGTGC
GGGTAGCGCTAGGTTGACGCGTCAATCGTCCGGGACGTCCTCCAAACAAATGTAGAGTCCCTGGATCGTGCTGCCAGCGAACGGCCCTAAGCCTCACCGAGCAGCCGACGCTGCAACCAAAGTGC
GGGTAGCGCTAGGTTGACGCGTCAATCGTCCGGGACGTCCTCCAAACCCCCATCTGCCTTAAGACCACAGACCTCAGGGAACGGCCCTAAGCCTCACCGAGCAGCCGACGCTGCAACCAAAGTGC
GGGTAGCGCTAGGTTGACGCGTCAATCGTCCGGGACGTCCTCCAAACTCCAGAGAACTTTGCTCCAAGTATGTCTTTACCCTGCGAACGGCCCTAAGCCTCACCGAGCAGCCGACGCTGCAACCAAAGTGC
GGGTAGCGCTAGGTTGACGCGTCAATCGTCCGGGACGTCCTCCAAACCCCCAGCCACTCCACCCACCCCTACTCTTGGAACGGCCCTAAGCCTCACCGAGCAGCCGACGCTGCAACCAAAGTGC
GGGTAGCGCTAGGTTGACGCGTCAATCGTCCGGGACGTCCTCCAAACGCAAAGGACAGCCTAAGACCTTCAGATGTGCTGGAACGGCCCTAAGCCTCACCGAGCAGCCGACGCTGCAACCAAAGTGC
GGGTAGCGCTAGGTTGACGCGTCAATCGTCCGGGACGTCCTCCAAACGGTGACAGTGATTACACCGTAGCGCATACCACGAACGGCCCTAAGCCTCACCGAGCAGCCGACGCTGCAACCAAAGTGC
GGGTAGCGCTAGGTTGACGCGTCAATCGTCCGGGACGTCCTCCAAACTGCCGAATAAATGATGGGCTGAAGTCTGAATCCCAGAACGGCCCTAAGCCTCACCGAGCAGCCGACGCTGCAACCAAAGTGC
GGGTAGCGCTAGGTTGACGCGTCAATCGTCCGGGACGTCCTCCAAACGGACTGGAACACCATGCTGGTCCTCCCACTGAACGGCCCTAAGCCTCACCGAGCAGCCGACGCTGCAACCAAAGTGC
GGGTAGCGCTAGGTTGACGCGTCAATCGTCCGGGACGTCCTCCAAACAAAAGGACACCCTTCCTCCCCATTCCAGGAGAACGGCCCTAAGCCTCACCGAGCAGCCGACGCTGCAACCAAAGTGC
GGGTAGCGCTAGGTTGACGCGTCAATCGTCCGGGACGTCCTCCAAACATGGTATCGCTAACATGCCTCATGTTACAGTCTCCTGGAACGGCCCTAAGCCTCACCGAGCAGCCGACGCTGCAACCAAAGTGC
GGGTAGCGCTAGGTTGACGCGTCAATCGTCCGGGACGTCCTCCAAACTATTACTCTGTGCTACTCACAAACCTCTCAGCTCCGTGAACGGCCCTAAGCCTCACCGAGCAGCCGACGCTGCAACCAAAGTGC
GGGTAGCGCTAGGTTGACGCGTCAATCGTCCGGGACGTCCTCCAAACGGATCCCATAAATTCCCAGGTTTGCTCAAGGGCGAACGGCCCTAAGCCTCACCGAGCAGCCGACGCTGCAACCAAAGTGC
GGGTAGCGCTAGGTTGACGCGTCAATCGTCCGGGACGTCCTCCAAACCCGGACTGGGCAAAGGGAAATAGGTCCCTCGAACGGCCCTAAGCCTCACCGAGCAGCCGACGCTGCAACCAAAGTGC
GGGTAGCGCTAGGTTGACGCGTCAATCGTCCGGGACGTCCTCCAAACTGGGCAAACAATGATGTGGCTTAACTGCGCGAACGGCCCTAAGCCTCACCGAGCAGCCGACGCTGCAACCAAAGTGC
GGGTAGCGCTAGGTTGACGCGTCAATCGTCCGGGACGTCCTCCAAACTGACAAATGCTGATCAAATGGCTGGCATTCCCCGAACGGCCCTAAGCCTCACCGAGCAGCCGACGCTGCAACCAAAGTGC
GGGTAGCGCTAGGTTGACGCGTCAATCGTCCGGGACGTCCTCCAAACAGGCAGCAAGCAGGTGGGTGAGAAGGAAGTGAACGGCCCTAAGCCTCACCGAGCAGCCGACGCTGCAACCAAAGTGC
GGGTAGCGCTAGGTTGACGCGTCAATCGTCCGGGACGTCCTCCAAACTGTTTGCACTTGAAATGGTCGGTGACAAGATATTCCCGAACGGCCCTAAGCCTCACCGAGCAGCCGACGCTGCAACCAAAGTGC
GGGTAGCGCTAGGTTGACGCGTCAATCGTCCGGGACGTCCTCCAAACAAAATGGCAGCTCCAGAGCCTGCCTGTTTCGAACGGCCCTAAGCCTCACCGAGCAGCCGACGCTGCAACCAAAGTGC
GGGTAGCGCTAGGTTGACGCGTCAATCGTCCGGGACGTCCTCCAAACAGCAGCGAGGTTTCACATCTGGGTCAGCCAGAACGGCCCTAAGCCTCACCGAGCAGCCGACGCTGCAACCAAAGTGC
GGGTAGCGCTAGGTTGACGCGTCAATCGTCCGGGACGTCCTCCAAACTGCTGACTGATAATCATAGGGTCCCAAAACAACAGGCGAACGGCCCTAAGCCTCACCGAGCAGCCGACGCTGCAACCAAAGTGC
GGGTAGCGCTAGGTTGACGCGTCAATCGTCCGGGACGTCCTCCAAACCCCCACACCCAGCAGGGAGTATTCGGTCATGAACGGCCCTAAGCCTCACCGAGCAGCCGACGCTGCAACCAAAGTGC
GGGTAGCGCTAGGTTGACGCGTCAATCGTCCGGGACGTCCTCCAAACAGGGTTAAGACAAAACCATGCACAAGAACTCACCATGGAACGGCCCTAAGCCTCACCGAGCAGCCGACGCTGCAACCAAAGTGC
GGGTAGCGCTAGGTTGACGCGTCAATCGTCCGGGACGTCCTCCAAACTGGATTCCCCACTCCCAACTCCACTCCCACGAACGGCCCTAAGCCTCACCGAGCAGCCGACGCTGCAACCAAAGTGC
GGGTAGCGCTAGGTTGACGCGTCAATCGTCCGGGACGTCCTCCAAACTCACAAATATCTTAGACATACTCTGCCAGGGCACGGGAACGGCCCTAAGCCTCACCGAGCAGCCGACGCTGCAACCAAAGTGC
GGGTAGCGCTAGGTTGACGCGTCAATCGTCCGGGACGTCCTCCAAACAGGCGTATCCCAGTGTCCCATCGAAGCAAAGAACGGCCCTAAGCCTCACCGAGCAGCCGACGCTGCAACCAAAGTGC
GGGTAGCGCTAGGTTGACGCGTCAATCGTCCGGGACGTCCTCCAAACACTATCATGGGCCTCCTACTGCCCTAAGAGTGAGAACGGCCCTAAGCCTCACCGAGCAGCCGACGCTGCAACCAAAGTGC
GGGTAGCGCTAGGTTGACGCGTCAATCGTCCGGGACGTCCTCCAAACAATCCAAACCCATGACCAGGGCCTGCAAAGGAACGGCCCTAAGCCTCACCGAGCAGCCGACGCTGCAACCAAAGTGC
GGGTAGCGCTAGGTTGACGCGTCAATCGTCCGGGACGTCCTCCAAACCCCCTTGTTCACCTGACTCAGCCCCTCTGGGAACGGCCCTAAGCCTCACCGAGCAGCCGACGCTGCAACCAAAGTGC
GGGTAGCGCTAGGTTGACGCGTCAATCGTCCGGGACGTCCTCCAAACGCTCCTTTCCACCCCTTTTCCCTTTCTCAGAGCGAACGGCCCTAAGCCTCACCGAGCAGCCGACGCTGCAACCAAAGTGC
GGGTAGCGCTAGGTTGACGCGTCAATCGTCCGGGACGTCCTCCAAACCTCTGCACATGACGTTCCCTCCGCCTATACAGAACGGCCCTAAGCCTCACCGAGCAGCCGACGCTGCAACCAAAGTGC
GGGTAGCGCTAGGTTGACGCGTCAATCGTCCGGGACGTCCTCCAAACCCTCTGACACCACCTATCCTCACAAACAGCCCGAACGGCCCTAAGCCTCACCGAGCAGCCGACGCTGCAACCAAAGTGC
GGGTAGCGCTAGGTTGACGCGTCAATCGTCCGGGACGTCCTCCAAACCAGTTCTGCACACATGTCCCAGGGCCTTCCGAACGGCCCTAAGCCTCACCGAGCAGCCGACGCTGCAACCAAAGTGC
GGGTAGCGCTAGGTTGACGCGTCAATCGTCCGGGACGTCCTCCAAACACTCCTTCAGTCACCCAGCTAATGCTATGGAGGGAACGGCCCTAAGCCTCACCGAGCAGCCGACGCTGCAACCAAAGTGC
GGGTAGCGCTAGGTTGACGCGTCAATCGTCCGGGACGTCCTCCAAACGAGAACTACAGGGAGAAGCAAAGAAATCAGAGAGCCAGAACGGCCCTAAGCCTCACCGAGCAGCCGACGCTGCAACCAAAGTGC
GGGTAGCGCTAGGTTGACGCGTCAATCGTCCGGGACGTCCTCCAAACAGGACAGGACAAGGTGAGTGGGAAGATGGTGAACGGCCCTAAGCCTCACCGAGCAGCCGACGCTGCAACCAAAGTGC
GGGTAGCGCTAGGTTGACGCGTCAATCGTCCGGGACGTCCTCCAAACCTTGGTGGACAGCCCTCAGAGAGCGGTATGGAACGGCCCTAAGCCTCACCGAGCAGCCGACGCTGCAACCAAAGTGC
GGGTAGCGCTAGGTTGACGCGTCAATCGTCCGGGACGTCCTCCAAACGGAGCTGAAACACTGCCCTTGGAAGGGAGTGAACGGCCCTAAGCCTCACCGAGCAGCCGACGCTGCAACCAAAGTGC
GGGTAGCGCTAGGTTGACGCGTCAATCGTCCGGGACGTCCTCCAAACGAGAACAGGGGCAAGTGTTGGCCTGAGTACGAACGGCCCTAAGCCTCACCGAGCAGCCGACGCTGCAACCAAAGTGC
GGGTAGCGCTAGGTTGACGCGTCAATCGTCCGGGACGTCCTCCAAACTCAGTGCTGCTGCCTTTGGGATGTCCAGGTGAACGGCCCTAAGCCTCACCGAGCAGCCGACGCTGCAACCAAAGTGC
GGGTAGCGCTAGGTTGACGCGTCAATCGTCCGGGACGTCCTCCAAACTTGAAGCACACAAGAGGACCTCCAAACTCAGATTTGGGAACGGCCCTAAGCCTCACCGAGCAGCCGACGCTGCAACCAAAGTGC
GGGTAGCGCTAGGTTGACGCGTCAATCGTCCGGGACGTCCTCCAAACAAAGAGAGAAAGAATAGACCCAAGAAAGGTCGCGAGGGAACGGCCCTAAGCCTCACCGAGCAGCCGACGCTGCAACCAAAGTGC
GGGTAGCGCTAGGTTGACGCGTCAATCGTCCGGGACGTCCTCCAAACTTTCCAAGCAGAGTGAACCTGAGAAGGTGCAGCGAACGGCCCTAAGCCTCACCGAGCAGCCGACGCTGCAACCAAAGTGC
GGGTAGCGCTAGGTTGACGCGTCAATCGTCCGGGACGTCCTCCAAACTTGAAGAATTGAGGGAAATTCCATTTGGCACAAGCGTGAACGGCCCTAAGCCTCACCGAGCAGCCGACGCTGCAACCAAAGTGC
GGGTAGCGCTAGGTTGACGCGTCAATCGTCCGGGACGTCCTCCAAACGGGTCGGGGTGGGGCTAGGAAGCTGAAGACGAACGGCCCTAAGCCTCACCGAGCAGCCGACGCTGCAACCAAAGTGC
GGGTAGCGCTAGGTTGACGCGTCAATCGTCCGGGACGTCCTCCAAACATAAGCAGAACCAATCCTGTGGAGCAGTTTGGACAGAACGGCCCTAAGCCTCACCGAGCAGCCGACGCTGCAACCAAAGTGC
GGGTAGCGCTAGGTTGACGCGTCAATCGTCCGGGACGTCCTCCAAACAAGGCAACAGGAAGCCTTTGAAGTGTTTTCAGATCTGGAACGGCCCTAAGCCTCACCGAGCAGCCGACGCTGCAACCAAAGTGC
GGGTAGCGCTAGGTTGACGCGTCAATCGTCCGGGACGTCCTCCAAACTGCTTTAGAAAGATCTCTTCCTGGCACCGTGACTGAACGGCCCTAAGCCTCACCGAGCAGCCGACGCTGCAACCAAAGTGC
GGGTAGCGCTAGGTTGACGCGTCAATCGTCCGGGACGTCCTCCAAACGGATTGGATGCAAGGCTGGAGAGAATGGTGCGAACGGCCCTAAGCCTCACCGAGCAGCCGACGCTGCAACCAAAGTGC
GGGTAGCGCTAGGTTGACGCGTCAATCGTCCGGGACGTCCTCCAAACGGAAGATGAGCCTTATAGTGTTCTGCCTGAAAGTCCCGAACGGCCCTAAGCCTCACCGAGCAGCCGACGCTGCAACCAAAGTGC
GGGTAGCGCTAGGTTGACGCGTCAATCGTCCGGGACGTCCTCCAAACTCAGAGCCTTTGGGACTTGCTAAGCCAGAGGGAACGGCCCTAAGCCTCACCGAGCAGCCGACGCTGCAACCAAAGTGC
GGGTAGCGCTAGGTTGACGCGTCAATCGTCCGGGACGTCCTCCAAACCCTCTGTGTCTGTACAAGAACTCACACCCACGTGAACGGCCCTAAGCCTCACCGAGCAGCCGACGCTGCAACCAAAGTGC
GGGTAGCGCTAGGTTGACGCGTCAATCGTCCGGGACGTCCTCCAAACGCTGACCTATAATGTCCCAGGTTCTGCCCACAGAACGGCCCTAAGCCTCACCGAGCAGCCGACGCTGCAACCAAAGTGC
GGGTAGCGCTAGGTTGACGCGTCAATCGTCCGGGACGTCCTCCAAACGTCTACACTGAGAGGGTGTAATTTTCCATAGGCCAGGGAACGGCCCTAAGCCTCACCGAGCAGCCGACGCTGCAACCAAAGTGC
GGGTAGCGCTAGGTTGACGCGTCAATCGTCCGGGACGTCCTCCAAACAAAAGCAGAAGTTGGCAGATGTAACAGCAACTGAGTGGAACGGCCCTAAGCCTCACCGAGCAGCCGACGCTGCAACCAAAGTGC
GGGTAGCGCTAGGTTGACGCGTCAATCGTCCGGGACGTCCTCCAAACAGAGATGGCCTCCAACTCATACATAAAATCCAAGCGTGAACGGCCCTAAGCCTCACCGAGCAGCCGACGCTGCAACCAAAGTGC
GGGTAGCGCTAGGTTGACGCGTCAATCGTCCGGGACGTCCTCCAAACAACTGTACTCCCTCCCTCATTTGAAGAAGTAGAGCCGGAACGGCCCTAAGCCTCACCGAGCAGCCGACGCTGCAACCAAAGTGC
GGGTAGCGCTAGGTTGACGCGTCAATCGTCCGGGACGTCCTCCAAACTAAATGTGGCACCTGTAAACAGATACCTATGCGTGCCGAACGGCCCTAAGCCTCACCGAGCAGCCGACGCTGCAACCAAAGTGC
GGGTAGCGCTAGGTTGACGCGTCAATCGTCCGGGACGTCCTCCAAACATGGTGTTTGTGACTGGGTTGGCTGGGTTGGAACGGCCCTAAGCCTCACCGAGCAGCCGACGCTGCAACCAAAGTGC
GGGTAGCGCTAGGTTGACGCGTCAATCGTCCGGGACGTCCTCCAAACTGTTCTAGCAACCCAGCTACAGAAATAGCCATTTGGAGAACGGCCCTAAGCCTCACCGAGCAGCCGACGCTGCAACCAAAGTGC
GGGTAGCGCTAGGTTGACGCGTCAATCGTCCGGGACGTCCTCCAAACGCAGCTTCTCAGCCCAGCCCTTCGTAGGCAGAACGGCCCTAAGCCTCACCGAGCAGCCGACGCTGCAACCAAAGTGC
GGGTAGCGCTAGGTTGACGCGTCAATCGTCCGGGACGTCCTCCAAACTTCTGTTTTCTTGCCCAGGAAGCGGTTTAAGAAATCCGAACGGCCCTAAGCCTCACCGAGCAGCCGACGCTGCAACCAAAGTGC
GGGTAGCGCTAGGTTGACGCGTCAATCGTCCGGGACGTCCTCCAAACTCTGTGGAGAAAGTATCCCTTTCCCCTAACACTGTGGGAACGGCCCTAAGCCTCACCGAGCAGCCGACGCTGCAACCAAAGTGC
GGGTAGCGCTAGGTTGACGCGTCAATCGTCCGGGACGTCCTCCAAACAAAGACCGAGCTGAGCCAGTTCAGGTCAAGTGAACGGCCCTAAGCCTCACCGAGCAGCCGACGCTGCAACCAAAGTGC
GGGTAGCGCTAGGTTGACGCGTCAATCGTCCGGGACGTCCTCCAAACGGCACAAATCTCCCCTCGGGTCACCAGACAGAACGGCCCTAAGCCTCACCGAGCAGCCGACGCTGCAACCAAAGTGC
GGGTAGCGCTAGGTTGACGCGTCAATCGTCCGGGACGTCCTCCAAACGGCCTGGGCATGGCTAAATCTCAATTAAAGGCAGAACGGCCCTAAGCCTCACCGAGCAGCCGACGCTGCAACCAAAGTGC
GGGTAGCGCTAGGTTGACGCGTCAATCGTCCGGGACGTCCTCCAAACGAGAAAGGAGGAATTTACAGAGAAGAGAGCAGGCTGGGAACGGCCCTAAGCCTCACCGAGCAGCCGACGCTGCAACCAAAGTGC
GGGTAGCGCTAGGTTGACGCGTCAATCGTCCGGGACGTCCTCCAAACAAACAGCATTAAGCCACTCAGGACACAGTGAATCAGAGAACGGCCCTAAGCCTCACCGAGCAGCCGACGCTGCAACCAAAGTGC
GGGTAGCGCTAGGTTGACGCGTCAATCGTCCGGGACGTCCTCCAAACATGCAAATGGACCGACCCAAATAGGTACCTCCTGAACGGCCCTAAGCCTCACCGAGCAGCCGACGCTGCAACCAAAGTGC
GGGTAGCGCTAGGTTGACGCGTCAATCGTCCGGGACGTCCTCCAAACCCCCATGCTGCTGGGTCCACTCTGTCTCACGAACGGCCCTAAGCCTCACCGAGCAGCCGACGCTGCAACCAAAGTGC
GGGTAGCGCTAGGTTGACGCGTCAATCGTCCGGGACGTCCTCCAAACACCCTCTGTCTTAGAACTGCTATAGAGGACAGAAGGCGAACGGCCCTAAGCCTCACCGAGCAGCCGACGCTGCAACCAAAGTGC
GGGTAGCGCTAGGTTGACGCGTCAATCGTCCGGGACGTCCTCCAAACCAGAGAACCAGGAATGGAAGACAGAAGAGAGATTGCCGAACGGCCCTAAGCCTCACCGAGCAGCCGACGCTGCAACCAAAGTGC
GGGTAGCGCTAGGTTGACGCGTCAATCGTCCGGGACGTCCTCCAAACTTTCTTTGATAGCAAGTTTTCCCCTGGAGAGACAGGTGAACGGCCCTAAGCCTCACCGAGCAGCCGACGCTGCAACCAAAGTGC
GGGTAGCGCTAGGTTGACGCGTCAATCGTCCGGGACGTCCTCCAAACTAAGGGACCTTTCAGATGACACCTTCTGTCCCTTTCGAACGGCCCTAAGCCTCACCGAGCAGCCGACGCTGCAACCAAAGTGC
GGGTAGCGCTAGGTTGACGCGTCAATCGTCCGGGACGTCCTCCAAACTCAGCGCTAGAAGGTCAGTTCAGGAACCTACTGGAACGGCCCTAAGCCTCACCGAGCAGCCGACGCTGCAACCAAAGTGC
GGGTAGCGCTAGGTTGACGCGTCAATCGTCCGGGACGTCCTCCAAACCCCCTTCAAGCTGGAGATCCTGGAGAGAATGCGAACGGCCCTAAGCCTCACCGAGCAGCCGACGCTGCAACCAAAGTGC
GGGTAGCGCTAGGTTGACGCGTCAATCGTCCGGGACGTCCTCCAAACCCAGAGACAGAATGGGCCATCTCCAAGGCCGAACGGCCCTAAGCCTCACCGAGCAGCCGACGCTGCAACCAAAGTGC
GGGTAGCGCTAGGTTGACGCGTCAATCGTCCGGGACGTCCTCCAAACAACTCAAATGCTGCCTGCTCCATGAAGCCCGAACGGCCCTAAGCCTCACCGAGCAGCCGACGCTGCAACCAAAGTGC
GGGTAGCGCTAGGTTGACGCGTCAATCGTCCGGGACGTCCTCCAAACTTTTGGCTCCCTTCACCCTCTGGTGTAGTGAGAACGGCCCTAAGCCTCACCGAGCAGCCGACGCTGCAACCAAAGTGC
GGGTAGCGCTAGGTTGACGCGTCAATCGTCCGGGACGTCCTCCAAACTTAACCTCTCCTGTGGCAGATGGCAGACCTGAACGGCCCTAAGCCTCACCGAGCAGCCGACGCTGCAACCAAAGTGC
GGGTAGCGCTAGGTTGACGCGTCAATCGTCCGGGACGTCCTCCAAACCATTGCAGCATCCCTGCAGCCCCATGCAAAGAACGGCCCTAAGCCTCACCGAGCAGCCGACGCTGCAACCAAAGTGC
GGGTAGCGCTAGGTTGACGCGTCAATCGTCCGGGACGTCCTCCAAACGCCTCCCTCCTGTAACAGACACTCAGTAGGCGAACGGCCCTAAGCCTCACCGAGCAGCCGACGCTGCAACCAAAGTGC
GGGTAGCGCTAGGTTGACGCGTCAATCGTCCGGGACGTCCTCCAAACACTTATGAAGATGACTCCTGCAAAAGTGGTGAGGGAGAACGGCCCTAAGCCTCACCGAGCAGCCGACGCTGCAACCAAAGTGC
GGGTAGCGCTAGGTTGACGCGTCAATCGTCCGGGACGTCCTCCAAACTTTTCTGGCACTGTCTTTTCTGAAGTCCCTGCTAGCGAACGGCCCTAAGCCTCACCGAGCAGCCGACGCTGCAACCAAAGTGC
GGGTAGCGCTAGGTTGACGCGTCAATCGTCCGGGACGTCCTCCAAACTGTCAGGATGTTCTCCAAAAGGGATAATGGCCTATCCGAACGGCCCTAAGCCTCACCGAGCAGCCGACGCTGCAACCAAAGTGC
GGGTAGCGCTAGGTTGACGCGTCAATCGTCCGGGACGTCCTCCAAACAGAGCTGATACCCAGCCAGTTCAAATCTCTGCTGAACGGCCCTAAGCCTCACCGAGCAGCCGACGCTGCAACCAAAGTGC
GGGTAGCGCTAGGTTGACGCGTCAATCGTCCGGGACGTCCTCCAAACGCATAAAGGCCTACACCTGTTCTGATTAGCCAGGGGAACGGCCCTAAGCCTCACCGAGCAGCCGACGCTGCAACCAAAGTGC
GGGTAGCGCTAGGTTGACGCGTCAATCGTCCGGGACGTCCTCCAAACCCTTCTCCTTGGCCACTCCCACACACTCCTGAACGGCCCTAAGCCTCACCGAGCAGCCGACGCTGCAACCAAAGTGC
GGGTAGCGCTAGGTTGACGCGTCAATCGTCCGGGACGTCCTCCAAACTTTCTAACTCTATCCCTCATCTGTCACCCACAGCTCTGAACGGCCCTAAGCCTCACCGAGCAGCCGACGCTGCAACCAAAGTGC
GGGTAGCGCTAGGTTGACGCGTCAATCGTCCGGGACGTCCTCCAAACAAAAGGGCAACCGTCATGTCGGAAGACTAAGAGGGAACGGCCCTAAGCCTCACCGAGCAGCCGACGCTGCAACCAAAGTGC
GGGTAGCGCTAGGTTGACGCGTCAATCGTCCGGGACGTCCTCCAAACGAAAGAGCATCCCAGTGAGACCCAGATTTCAGCTGAACGGCCCTAAGCCTCACCGAGCAGCCGACGCTGCAACCAAAGTGC
GGGTAGCGCTAGGTTGACGCGTCAATCGTCCGGGACGTCCTCCAAACGAGGCCTGAAGGCTGAGGGAATCTACCATGGGAACGGCCCTAAGCCTCACCGAGCAGCCGACGCTGCAACCAAAGTGC
GGGTAGCGCTAGGTTGACGCGTCAATCGTCCGGGACGTCCTCCAAACGGGGTGAACATGAGGTGTGGTAAGGCAGGGGAACGGCCCTAAGCCTCACCGAGCAGCCGACGCTGCAACCAAAGTGC
GGGTAGCGCTAGGTTGACGCGTCAATCGTCCGGGACGTCCTCCAAACACATGAGAGTAGAGGAGAGTGTGGATGACTTTGGAGGGAACGGCCCTAAGCCTCACCGAGCAGCCGACGCTGCAACCAAAGTGC
GGGTAGCGCTAGGTTGACGCGTCAATCGTCCGGGACGTCCTCCAAACCGGCTCCTCAAAGGTAAGCGTGGAAGTCTGGAACGGCCCTAAGCCTCACCGAGCAGCCGACGCTGCAACCAAAGTGC
GGGTAGCGCTAGGTTGACGCGTCAATCGTCCGGGACGTCCTCCAAACGCCAAGGCCAAGGATGAAAGATCAGTGCAGGGAACGGCCCTAAGCCTCACCGAGCAGCCGACGCTGCAACCAAAGTGC
GGGTAGCGCTAGGTTGACGCGTCAATCGTCCGGGACGTCCTCCAAACTTTTGCCCACAAAGCCTCAATTTTCTTAAGGCTGCGAACGGCCCTAAGCCTCACCGAGCAGCCGACGCTGCAACCAAAGTGC
GGGTAGCGCTAGGTTGACGCGTCAATCGTCCGGGACGTCCTCCAAACTGCAAGCTGAAGGGTTGGGTGGTATCCACGGAACGGCCCTAAGCCTCACCGAGCAGCCGACGCTGCAACCAAAGTGC
GGGTAGCGCTAGGTTGACGCGTCAATCGTCCGGGACGTCCTCCAAACTTGACAGACTTTTCCTAATGTCTCCAAGCTGTGAGGGGAACGGCCCTAAGCCTCACCGAGCAGCCGACGCTGCAACCAAAGTGC
GGGTAGCGCTAGGTTGACGCGTCAATCGTCCGGGACGTCCTCCAAACACTAGCTCTCTATCCTGAAATGGAAGCTGTAGCTGCCGAACGGCCCTAAGCCTCACCGAGCAGCCGACGCTGCAACCAAAGTGC
GGGTAGCGCTAGGTTGACGCGTCAATCGTCCGGGACGTCCTCCAAACATTCCGATCCTTTGAGAAAGACTGCCTCTGTGAATGAGAACGGCCCTAAGCCTCACCGAGCAGCCGACGCTGCAACCAAAGTGC
GGGTAGCGCTAGGTTGACGCGTCAATCGTCCGGGACGTCCTCCAAACGACAACTCAAGCCTCTGGAAGGAGTTAGCTGCAGAACGGCCCTAAGCCTCACCGAGCAGCCGACGCTGCAACCAAAGTGC
GGGTAGCGCTAGGTTGACGCGTCAATCGTCCGGGACGTCCTCCAAACTGGGTGAAGGTTTTCTGTTTTCTGGAGCTGTGTAAGAGAACGGCCCTAAGCCTCACCGAGCAGCCGACGCTGCAACCAAAGTGC
GGGTAGCGCTAGGTTGACGCGTCAATCGTCCGGGACGTCCTCCAAACGGGGCAAGCAGAATGCTGCAGGCATCTGAGGAACGGCCCTAAGCCTCACCGAGCAGCCGACGCTGCAACCAAAGTGC
GGGTAGCGCTAGGTTGACGCGTCAATCGTCCGGGACGTCCTCCAAACAAACCTGCAGAAAGGCATTAGCTAACAGAGGTGTCTGAACGGCCCTAAGCCTCACCGAGCAGCCGACGCTGCAACCAAAGTGC
GGGTAGCGCTAGGTTGACGCGTCAATCGTCCGGGACGTCCTCCAAACGAGGAGCTTAGGACTGACACTAAGGGTCCTAATCCAGAACGGCCCTAAGCCTCACCGAGCAGCCGACGCTGCAACCAAAGTGC
GGGTAGCGCTAGGTTGACGCGTCAATCGTCCGGGACGTCCTCCAAACAAGAATGCCATCAAGTAAGATGTGGAGCACACGATGGGAACGGCCCTAAGCCTCACCGAGCAGCCGACGCTGCAACCAAAGTGC
GGGTAGCGCTAGGTTGACGCGTCAATCGTCCGGGACGTCCTCCAAACACCTGCCTCTCCCTAATGATGTGAAGATCTCAAGTGAGAACGGCCCTAAGCCTCACCGAGCAGCCGACGCTGCAACCAAAGTGC
GGGTAGCGCTAGGTTGACGCGTCAATCGTCCGGGACGTCCTCCAAACACTTAACATATTGGGGTGCTCAGAGTTCAGGGTCACGAACGGCCCTAAGCCTCACCGAGCAGCCGACGCTGCAACCAAAGTGC
GGGTAGCGCTAGGTTGACGCGTCAATCGTCCGGGACGTCCTCCAAACCCTAGGCAGGTGGCAGATCTCATATGTACTTGCAGAACGGCCCTAAGCCTCACCGAGCAGCCGACGCTGCAACCAAAGTGC
GGGTAGCGCTAGGTTGACGCGTCAATCGTCCGGGACGTCCTCCAAACTTTGTTACATTTCATCCCTACTCCCACCATTCCCACAGAACGGCCCTAAGCCTCACCGAGCAGCCGACGCTGCAACCAAAGTGC
GGGTAGCGCTAGGTTGACGCGTCAATCGTCCGGGACGTCCTCCAAACGGGGCTTGGTACCAAGTAAATTATGACATGGGACCCGAACGGCCCTAAGCCTCACCGAGCAGCCGACGCTGCAACCAAAGTGC
GGGTAGCGCTAGGTTGACGCGTCAATCGTCCGGGACGTCCTCCAAACCAAGGAATCTCTGACACAGGAGAGACACACAATGACAGAACGGCCCTAAGCCTCACCGAGCAGCCGACGCTGCAACCAAAGTGC
GGGTAGCGCTAGGTTGACGCGTCAATCGTCCGGGACGTCCTCCAAACAAAAGATGGATAGGCGAAAGAAGGACAGGATGGGAGAACGGCCCTAAGCCTCACCGAGCAGCCGACGCTGCAACCAAAGTGC
GGGTAGCGCTAGGTTGACGCGTCAATCGTCCGGGACGTCCTCCAAACTTAGTGCTTGTTTTAATCTGCTTTGGAGCTGCCAAGGGAACGGCCCTAAGCCTCACCGAGCAGCCGACGCTGCAACCAAAGTGC
GGGTAGCGCTAGGTTGACGCGTCAATCGTCCGGGACGTCCTCCAAACTTTTCTGTGCTTCCTGGAAATCATGCTGGAAGCAGAACGGCCCTAAGCCTCACCGAGCAGCCGACGCTGCAACCAAAGTGC
GGGTAGCGCTAGGTTGACGCGTCAATCGTCCGGGACGTCCTCCAAACACCAGATTTGAGGCGCAGCATGAAACATCTGTGAACGGCCCTAAGCCTCACCGAGCAGCCGACGCTGCAACCAAAGTGC
[truncated: 7,078 more rows]
