# Supplementary material for: Reconstructing the three-dimensional architecture of extrachromosomal DNA with ec3D
Source: Nat Commun. 2025 Dec 20;17:894. doi: 10.1038/s41467-025-67614-7 (PMC12830899; doi:10.1038/s41467-025-67614-7)
Supplement: Supplementary file 13 — Supplementary Data 11 [file 41467_2025_67614_MOESM13_ESM.xlsx]

## Sheet: Sheet1
Supplementary Data 11 - MDM2 IDT Oligos
Well Position	Name	Sequence
A1	Bridge1Sec6	GATCGGGTCCCACAACCACGGGTCTTACAGCGGCGCAATGTTCACACGCTCTCCGTCTTGGCCGTGGTCGATCA
A2	Bridge2Sec6	GGACGTCCCGGACGATTGACGGTCTTACAGCGGCGCAATGTTCACACGCTCTCCGTCTTGGCCGTGGTCGATCA
A3	Bridge3Sec6	GTGCCAGGCAACCCGTACAGGGTCTTACAGCGGCGCAATGTTCACACGCTCTCCGTCTTGGCCGTGGTCGATCA
A4	Bridge4Sec6	GAACGGCGTCACGCTGAGAGGGTCTTACAGCGGCGCAATGTTCACACGCTCTCCGTCTTGGCCGTGGTCGATCA
A5	Bridge5Sec6	GTGTCGCACGCAGGCCTATCGGTCTTACAGCGGCGCAATGTTCACACGCTCTCCGTCTTGGCCGTGGTCGATCA
A6	Bridge6Sec6	GAATGCGGACACCCAGGCACGGTCTTACAGCGGCGCAATGTTCACACGCTCTCCGTCTTGGCCGTGGTCGATCA
A7	Bridge7Sec6	CGACCGGACACACCTCCTCCGGTCTTACAGCGGCGCAATGTTCACACGCTCTCCGTCTTGGCCGTGGTCGATCA
A8	Bridge8Sec6	GCCATGAACCGACCACGGACGGTCTTACAGCGGCGCAATGTTCACACGCTCTCCGTCTTGGCCGTGGTCGATCA
A9	Bridge9Sec6	CTATCAGGGCAACCCGCAGGGGTCTTACAGCGGCGCAATGTTCACACGCTCTCCGTCTTGGCCGTGGTCGATCA
A10	Bridge10Sec6	GAAGCACGACCACCACAGGGGGTCTTACAGCGGCGCAATGTTCACACGCTCTCCGTCTTGGCCGTGGTCGATCA
A11	Bridge11Sec5	GGTCTTACAGCGGCGCAATGTTTAGCGCAGGAGGTCCACGACGTGCAAGGGTGTCTTCCGGTTAGGCGTCTGCG
A12	Bridge12Sec5	GGTCTTACAGCGGCGCAATGTTTAGCGCAGGAGGTCCACGACGTGCAAGGGTGTCCCTTCGCACAACTCCCGTG
B1	Bridge13Sec5	GGTCTTACAGCGGCGCAATGTTTAGCGCAGGAGGTCCACGACGTGCAAGGGTGTCAATCACCGTGCGAGCCTCC
B2	Bridge14Sec5	GGTCTTACAGCGGCGCAATGTTTAGCGCAGGAGGTCCACGACGTGCAAGGGTGTCACTCGCAAACGCATCGCAC
B3	Bridge15Sec5	GGTCTTACAGCGGCGCAATGTTTAGCGCAGGAGGTCCACGACGTGCAAGGGTGTCTTGGAGCCACCGCTGTACC
B4	Bridge16Sec5	GGTCTTACAGCGGCGCAATGTTTAGCGCAGGAGGTCCACGACGTGCAAGGGTGTGCTGCGTCTTCCGTCGTGAG
B5	Bridge17Sec5	GGTCTTACAGCGGCGCAATGTTTAGCGCAGGAGGTCCACGACGTGCAAGGGTGTGGTGTGGGCTAGCGCCAATC
B6	Bridge18Sec5	GGTCTTACAGCGGCGCAATGTTTAGCGCAGGAGGTCCACGACGTGCAAGGGTGTGTTCGTGGTCTCCGCAACGG
B7	Bridge19Sec5	GGTCTTACAGCGGCGCAATGTTTAGCGCAGGAGGTCCACGACGTGCAAGGGTGTGGTGAGGCTTAGGGCCGTTC
B8	Bridge20Sec5	GGTCTTACAGCGGCGCAATGTTTAGCGCAGGAGGTCCACGACGTGCAAGGGTGTCGCTAAGGACCTGCGCTCTC
B9	Toes1	GGTCGTCGATCGGGTCCCACAACCACG
B10	Toes2	GTTTGGAGGACGTCCCGGACGATTGAC
B11	Toes3	GAGGTCTGTGCCAGGCAACCCGTACAG
B12	Toes4	GGCACATGAACGGCGTCACGCTGAGAG
C1	Toes5	CTATCCGGTGTCGCACGCAGGCCTATC
C2	Toes6	CACTCGGGAATGCGGACACCCAGGCAC
C3	Toes7	GCTGCATCGACCGGACACACCTCCTCC
C4	Toes8	GACGAGCGCCATGAACCGACCACGGAC
C5	Toes9	GCCGGTCCTATCAGGGCAACCCGCAGG
C6	Toes10	GCTTCCCGAAGCACGACCACCACAGGG
C7	Toes11	GAGGGTGCTTCCGGTTAGGCGTCTGCG
C8	Toes12	GAGGGCACCCTTCGCACAACTCCCGTG
C9	Toes13	CCCTGTGCAATCACCGTGCGAGCCTCC
C10	Toes14	GCAGACACACTCGCAAACGCATCGCAC
C11	Toes15	GCGGAAACTTGGAGCCACCGCTGTACC
C12	Toes16	GAGTTGGGCTGCGTCTTCCGTCGTGAG
D1	Toes17	CGGAATCGGTGTGGGCTAGCGCCAATC
D2	Toes18	CGAGCCAGTTCGTGGTCTCCGCAACGG
D3	Toes19	GCTGCTCGGTGAGGCTTAGGGCCGTTC
D4	Toes20	CAGCGCTCGCTAAGGACCTGCGCTCTC
D5	Unversal Forward Primer21	GGGTAGCGCTAGGTTGACGC
D6	Unversal Reverse Primer22	TAATACGACTCACTATAGGGGCACTTTGGTTGCAGCGTCG
	Alexa647- Sec6	/5Alex647N/TGATCGACCACGGCCAAGACGGAGAGCGTGTG/3AlexF647N/
	Alexa647- Sec5	/5Alex647N/ACACCCTTGCACGTCGTGGACCTCCTGCGCTA/3AlexF647N/
